# Supplementary material for: Comparative transcriptome analysis of papilla and skin in the sea cucumber, Apostichopus japonicus
Source: PeerJ. 2016 Mar 7;4:e1779. doi: 10.7717/peerj.1779 (PMC4793329; doi:10.7717/peerj.1779)
Supplement: Supplemental Information 2 [file peerj-04-1779-s002.xlsx]

## Sheet: Table S2
Supplemental Table S2. Differentially expressed genes identified by transcriptome comparison between papilla and skin.
#ID	Papilla	Skin	FDR	log2FC	regulated	COG_class	COG_class_annotation	GO_annotation	KEGG_annotation	KOG_class	KOG_class_annotation	Pfam_annotation	Swissprot_annotation	nr_annotation
c12901.graph_c0	1.02132	0	6.83519e-06	4.39717	up	[TDK]	--	Cellular Component: protein kinase CK2 complex (GO:0005956);; Molecular Function: kinase activity (GO:0016301);; Molecular Function: protein kinase regulator activity (GO:0019887);; Biological Process: regulation of protein kinase activity (GO:0045859);;	K03115|1e-159|dre:30428|ck2b, csnk2b, wu:fa16g01	[TDK]	--	Casein kinase II regulatory subunit	Casein kinase II subunit beta OS=Spodoptera frugiperda (Fall armyworm) PE=2 SV=1	PREDICTED: casein kinase II subunit beta-like [Aplysia californica]
c14516.graph_c0	1.83341	0	2.33147e-15	5.69749	up	[R]	General function prediction only	Molecular Function: organic cyclic compound binding (GO:0097159);; Molecular Function: heterocyclic compound binding (GO:1901363);;	K13126|0.0|dre:606498|pabpc1a, pabpc1, wu:fb16a02, wu:fi19b08, wu:fj12d09, wu:fj61f06, zgc:109879	[AJ]	--	RNA recognition motif. (a.k.a. RRM, RBD, or RNP domain);; Poly-adenylate binding protein, unique domain;; RNA recognition motif (a.k.a. RRM, RBD, or RNP domain);; RNA recognition motif. (a.k.a. RRM, RBD, or RNP domain)	Polyadenylate-binding protein GN=pAbp OS=Drosophila melanogaster (Fruit fly) PE=1 SV=3	Polyadenylate-binding protein 1 [Zootermopsis nevadensis]
c14530.graph_c0	1.82205	0	1.22009e-05	4.34724	up	--	--	--	K12832|3e-58|xtr:549195|sf3b5	[S]	Function unknown	Splicing factor 3B subunit 10 (SF3b10)	Probable splicing factor 3B subunit 5 GN=CG11985 OS=Drosophila melanogaster (Fruit fly) PE=1 SV=1	putative splicing factor 3B subunit 5 [Zootermopsis nevadensis]
c14535.graph_c0	1.70591	0.0364489	1.78781e-07	4.11625	up	[E]	Amino acid transport and metabolism	Molecular Function: L-aspartate:2-oxoglutarate aminotransferase activity (GO:0004069);; Biological Process: cellular amino acid metabolic process (GO:0006520);; Biological Process: biosynthetic process (GO:0009058);; Molecular Function: pyridoxal phosphate binding (GO:0030170);; Molecular Function: L-phenylalanine:2-oxoglutarate aminotransferase activity (GO:0080130);;	K14455|1e-163|dre:335974|got2b, fj40h07, wu:fj40h07, zgc:56425	[E]	Amino acid transport and metabolism	Aminotransferase class I and II	Aspartate aminotransferase, mitochondrial (Precursor) GN=aatA OS=Dictyostelium discoideum (Slime mold) PE=3 SV=1	PREDICTED: aspartate aminotransferase, mitochondrial-like isoform 2 [Strongylocentrotus purpuratus]
c14554.graph_c0	3.06281	0	1.22009e-05	4.34724	up	--	--	--	--	[U]	Intracellular trafficking, secretion, and vesicular transport	Annexin	Annexin B9 GN=AnxB9 OS=Drosophila melanogaster (Fruit fly) PE=2 SV=2	annexin XIIIb [Capsaspora owczarzaki ATCC 30864]
c14579.graph_c0	1.78904	0.0338814	1.39299e-08	4.2846	up	--	--	--	--	[S]	Function unknown	Domain of unknown function (DUF1794)	Uncharacterized protein C28H8.5 (Precursor) GN=C28H8.5 OS=Caenorhabditis elegans PE=3 SV=1	PREDICTED: THAP domain-containing protein 4-like [Strongylocentrotus purpuratus]
c14580.graph_c0	0	6.767	0	-7.99318	down	[P]	Inorganic ion transport and metabolism	Molecular Function: catalase activity (GO:0004096);; Cellular Component: peroxisome (GO:0005777);; Biological Process: response to oxidative stress (GO:0006979);; Biological Process: peroxisome organization (GO:0007031);; Biological Process: axon guidance (GO:0007411);; Biological Process: determination of adult lifespan (GO:0008340);;	K03781|1e-129|cbr:CBG20807|Hypothetical protein CBG20807	[P]	Inorganic ion transport and metabolism	Catalase;; Catalase-related immune-responsive	Peroxisomal catalase 1 GN=ctl-2 OS=Caenorhabditis elegans PE=2 SV=3	catalase isozyme 2 [Capsaspora owczarzaki ATCC 30864]
c14611.graph_c0	2.44191	0	1.22009e-05	4.34724	up	--	--	--	K06112|7e-65|dre:561689|si:ch211-139k15.1	[R]	General function prediction only	--	--	PREDICTED: membrane-associated guanylate kinase, WW and PDZ domain-containing protein 2 [Ciona intestinalis]
c14614.graph_c0	1.64004	0	1.23016e-06	4.53737	up	[G]	Carbohydrate transport and metabolism	Cellular Component: phosphopyruvate hydratase complex (GO:0000015);; Molecular Function: magnesium ion binding (GO:0000287);; Molecular Function: phosphopyruvate hydratase activity (GO:0004634);; Biological Process: glycolysis (GO:0006096);;	K01689|1e-133|dre:393668|MGC73056	[G]	Carbohydrate transport and metabolism	Enolase, C-terminal TIM barrel domain	Enolase OS=Doryteuthis pealeii (Longfin inshore squid) PE=2 SV=1	PREDICTED: LOW QUALITY PROTEIN: alpha-enolase-like [Strongylocentrotus purpuratus]
c14627.graph_c0	2.39868	0.0217259	0	5.32541	up	[J]	Translation, ribosomal structure and biogenesis	Biological Process: primary metabolic process (GO:0044238);; Biological Process: cellular macromolecule metabolic process (GO:0044260);;	K03262|0.0|dre:322256|eif5, fb37c12, fb54h04, wu:fb37c12, wu:fb54h04, zgc:56606, zgc:77026	[J]	Translation, ribosomal structure and biogenesis	Domain found in IF2B/IF5;; eIF4-gamma/eIF5/eIF2-epsilon	Eukaryotic translation initiation factor 5 GN=eIF5 OS=Drosophila melanogaster (Fruit fly) PE=1 SV=1	PREDICTED: eukaryotic translation initiation factor 5-like isoform X1 [Saccoglossus kowalevskii]
c14637.graph_c0	5.75694	0.0510337	0	5.35598	up	--	--	Molecular Function: translation elongation factor activity (GO:0003746);; Cellular Component: eukaryotic translation elongation factor 1 complex (GO:0005853);; Biological Process: translational elongation (GO:0006414);;	K03233|1e-106|dre:195822|eef1g, db03h10, fk76a09, mg:db03h10, wu:fk76a09	[J]	Translation, ribosomal structure and biogenesis	Elongation factor 1 gamma, conserved domain	Elongation factor 1-gamma OS=Artemia salina (Brine shrimp) PE=1 SV=3	putative elongation factor 1-gamma [Ascaris suum]
c14652.graph_c0	0.138198	1.84253	0.000240024	-3.20414	down	--	--	Molecular Function: hydrolase activity (GO:0016787);;	--	--	--	--	Putative uncharacterized protein DDB_G0288537 GN=DDB_G0288537 OS=Dictyostelium discoideum (Slime mold) PE=4 SV=1	hypothetical protein, conserved in Plasmodium species [Plasmodium knowlesi strain H]
c14689.graph_c0	5.61746	0.312063	0.000125775	3.26608	up
c14695.graph_c0	1.85927	0	3.02513e-09	4.95913	up	[RTKL]	--	Molecular Function: protein serine/threonine kinase activity (GO:0004674);; Molecular Function: ATP binding (GO:0005524);; Biological Process: protein phosphorylation (GO:0006468);; Biological Process: cell division (GO:0051301);;	K02087|0.0|dre:80973|cdk1, MGC92032, cdc2, wu:fc30e01, zgc:92032	[R]	General function prediction only	Protein kinase domain;; Protein tyrosine kinase	Cyclin-dependent kinase 1 GN=cdc2 OS=Drosophila melanogaster (Fruit fly) PE=1 SV=1	hypothetical protein BRAFLDRAFT_114825 [Branchiostoma floridae]
c14717.graph_c0	0	5.86585	0	-6.39292	down	[O]	Posttranslational modification, protein turnover, chaperones	Biological Process: protein peptidyl-prolyl isomerization (GO:0000413);; Molecular Function: peptidyl-prolyl cis-trans isomerase activity (GO:0003755);; Biological Process: protein folding (GO:0006457);;	K01802|1e-100|bmy:Bm1_55850|cyclophilin-type peptidyl-prolyl cis-trans isomerase-2, Bmcyp-2	[O]	Posttranslational modification, protein turnover, chaperones	Cyclophilin type peptidyl-prolyl cis-trans isomerase/CLD	Peptidyl-prolyl cis-trans isomerase A GN=ppiA OS=Dictyostelium discoideum (Slime mold) PE=1 SV=1	Peptidyl-prolyl cis-trans isomerase 3 [Toxocara canis]
c14754.graph_c0	5.93211	0.115629	0	5.07011	up	--	--	--	K06460|1e-111|dre:406737|cd9b, cd9l, fb13e10, fb82b11, wu:fb13e10, wu:fb82b11, zgc:56512	[R]	General function prediction only	Tetraspanin family	23 kDa integral membrane protein OS=Schistosoma japonicum (Blood fluke) PE=2 SV=1	hypothetical protein CAPTEDRAFT_182031 [Capitella teleta]
c14782.graph_c0	2.51393	0	0	6.44324	up
c14789.graph_c0	2.49249	0	6.99841e-07	4.58123	up	--	--	Molecular Function: DNA binding (GO:0003677);;	--	[BL]	--	Barrier to autointegration factor	Barrier-to-autointegration factor GN=baf OS=Drosophila melanogaster (Fruit fly) PE=3 SV=1	hypothetical protein BRAFLDRAFT_202557 [Branchiostoma floridae]
c14797.graph_c0	5.62896	0.0498992	0	5.35598	up
c14806.graph_c0	7.43669	0	2.33147e-15	5.69749	up	[J]	Translation, ribosomal structure and biogenesis	Molecular Function: structural constituent of ribosome (GO:0003735);; Cellular Component: ribosome (GO:0005840);; Biological Process: translation (GO:0006412);;	K02901|3e-94|dre:325618|rpl27, fc93a08, wu:fc93a08, zgc:56171	[J]	Translation, ribosomal structure and biogenesis	Ribosomal L27e protein family;; KOW motif	60S ribosomal protein L27 GN=rpl-27 OS=Caenorhabditis elegans PE=2 SV=1	PREDICTED: 60S ribosomal protein L27-like isoform X2 [Saccoglossus kowalevskii]
c14811.graph_c0	2.91201	0	2.18657e-05	4.29552	up
c14826.graph_c0	2.71467	0.0418906	1.03416e-10	4.57182	up	[T]	Signal transduction mechanisms	Molecular Function: protein domain specific binding (GO:0019904);;	K06630|1e-126|dre:322060|ywhae1, fe38c12, wu:fb48f06, wu:fe38c12, wu:fi22e10, ywhae, zgc:55377, zgc:77062	[O]	Posttranslational modification, protein turnover, chaperones	14-3-3 protein	14-3-3 protein epsilon GN=14-3-3epsilon OS=Drosophila melanogaster (Fruit fly) PE=1 SV=2	14-3-3 protein epsilon [Schistocerca gregaria]
c14872.graph_c0	2.85147	0	6.83519e-06	4.39717	up	[J]	Translation, ribosomal structure and biogenesis	Molecular Function: structural constituent of ribosome (GO:0003735);; Cellular Component: ribosome (GO:0005840);; Biological Process: translation (GO:0006412);;	K02955|1e-102|xtr:549476|hypothetical protein LOC549476	[J]	Translation, ribosomal structure and biogenesis	Ribosomal protein S11	40S ribosomal protein S14 GN=RPS14 OS=Podocoryne carnea PE=2 SV=1	PREDICTED: 40S ribosomal protein S14-like [Hydra vulgaris]
c14879.graph_c0	2.01629	0.0243499	1.05249e-13	4.91754	up	[P]	Inorganic ion transport and metabolism	Molecular Function: catalytic activity (GO:0003824);;	K01136|0.0|dre:559959|ids	[R]	General function prediction only	Sulfatase;; Type I phosphodiesterase / nucleotide pyrophosphatase	Extracellular sulfatase SULF-1 homolog (Precursor) GN=Sulf1 OS=Drosophila melanogaster (Fruit fly) PE=1 SV=1	PREDICTED: iduronate 2-sulfatase-like [Ciona intestinalis]
c14880.graph_c0	0	1.79318	5.8753e-13	-5.49812	down	--	--	Cellular Component: plastid (GO:0009536);; Biological Process: chlorophyll biosynthetic process (GO:0015995);; Molecular Function: oxidoreductase activity (GO:0016491);; Molecular Function: transition metal ion binding (GO:0046914);;	--	--	--	Rubrerythrin	--	magnesium-protoporphyrin IX monomethyl ester cyclase [Alveolata sp. CCMP3155]
c14920.graph_c0	1.55829	0	6.99841e-07	4.58123	up	--	--	--	--	[J]	Translation, ribosomal structure and biogenesis	--	Probable serine/threonine-protein kinase samkC GN=samkC OS=Dictyostelium discoideum (Slime mold) PE=3 SV=2	Y-box protein 1/2/3 [Ciona intestinalis]
c14925.graph_c0	0	6.25567	0	-6.5455	down	--	--	Cellular Component: chloroplast (GO:0009507);; Biological Process: photosynthesis, light harvesting (GO:0009765);; Cellular Component: membrane (GO:0016020);;	--	--	--	Chlorophyll A-B binding protein	Protein cappuccino GN=capu OS=Drosophila melanogaster (Fruit fly) PE=1 SV=2	light-harvesting complex protein LHCG11 [Bigelowiella natans]
c14968.graph_c0	1.85702	0	2.17049e-06	4.49214	up	[G]	Carbohydrate transport and metabolism	Biological Process: carbohydrate metabolic process (GO:0005975);; Molecular Function: glycogen phosphorylase activity (GO:0008184);; Molecular Function: pyridoxal phosphate binding (GO:0030170);;	K00688|1e-154|dre:493916|pygl, zgc:66314	[G]	Carbohydrate transport and metabolism	Carbohydrate phosphorylase	Glycogen phosphorylase GN=GlyP OS=Drosophila melanogaster (Fruit fly) PE=2 SV=2	Glycogen phosphorylase, partial [Stegodyphus mimosarum]
c15014.graph_c0	1.98655	0.05173	1.03186e-11	4.32472	up	[R]	General function prediction only	Molecular Function: GTP binding (GO:0005525);; Cellular Component: intracellular (GO:0005622);; Biological Process: small GTPase mediated signal transduction (GO:0007264);;	K07941|1e-123|xtr:448503|arf6.2, MGC79593, arf6	[U]	Intracellular trafficking, secretion, and vesicular transport	ADP-ribosylation factor family;; Ras family;; Signal recognition particle receptor beta subunit;; Gtr1/RagA G protein conserved region;; Miro-like protein	ADP-ribosylation factor 3 GN=Arf51F OS=Drosophila melanogaster (Fruit fly) PE=2 SV=3	hypothetical protein SINV_14695 [Solenopsis invicta]
c15051.graph_c0	2.25844	0	1.4938e-08	4.85578	up	[K]	Transcription	Molecular Function: calcium-transporting ATPase activity (GO:0005388);;	K03626|1e-138|rno:288770|Naca	[K]	Transcription	NAC domain;; UBA/TS-N domain	Nascent polypeptide-associated complex subunit alpha GN=Nacalpha OS=Drosophila melanogaster (Fruit fly) PE=1 SV=2	PREDICTED: nascent polypeptide-associated complex subunit alpha-like isoform X1 [Saccoglossus kowalevskii]
c15071.graph_c0	6.22986	0.0225707	0	6.63435	up	[R]	General function prediction only	--	--	[DO]	--	WD domain, G-beta repeat;; Eukaryotic translation initiation factor eIF2A	Anaphase-promoting complex subunit cdc20 GN=cdc20 OS=Dictyostelium discoideum (Slime mold) PE=1 SV=1	PREDICTED: cell division cycle protein 20 homolog [Bombus impatiens]
c15100.graph_c0	9.92532	0.0992474	0	5.90424	up	[Z]	Cytoskeleton	Molecular Function: GTPase activity (GO:0003924);; Molecular Function: structural constituent of cytoskeleton (GO:0005200);; Molecular Function: GTP binding (GO:0005525);; Cellular Component: cytoplasm (GO:0005737);; Cellular Component: microtubule (GO:0005874);; Biological Process: GTP catabolic process (GO:0006184);; Biological Process: microtubule-based process (GO:0007017);; Biological Proces…	K07375|0.0|dre:641421|MGC123194	[Z]	Cytoskeleton	Tubulin/FtsZ family, GTPase domain;; Tubulin C-terminal domain;; Misato Segment II tubulin-like domain	Tubulin beta chain OS=Paracentrotus lividus (Common sea urchin) PE=2 SV=1	Tubulin beta-2C chain [Schistosoma japonicum]
c15110.graph_c0	9.42337	0.0360199	0	6.55753	up	--	--	Molecular Function: actin binding (GO:0003779);; Cellular Component: cytoplasm (GO:0005737);; Cellular Component: cytoskeleton (GO:0005856);; Biological Process: sequestering of actin monomers (GO:0042989);;	K05764|4e-17|bta:100137883|thymosin, beta 4	[N]	Cell motility	--	Thymosin beta OS=Aplysia californica (California sea hare) PE=1 SV=1	PREDICTED: thymosin beta-12-like [Amphimedon queenslandica]
c15127.graph_c0	1.23597	0	2.17049e-06	4.49214	up
c15129.graph_c0	1.6682	0	2.18657e-05	4.29552	up	--	--	--	K14303|1e-112|mdo:100012914|NUP160	[YU]	--	--	Nuclear pore complex protein Nup160 homolog GN=Nup160 OS=Drosophila melanogaster (Fruit fly) PE=1 SV=1	hypothetical protein CAPTEDRAFT_178964 [Capitella teleta]
c15152.graph_c0	9.04695	0	0	5.88416	up
c15157.graph_c0	1.79634	0.0787824	2.14736e-06	3.59356	up	[O]	Posttranslational modification, protein turnover, chaperones	Molecular Function: protein binding (GO:0005515);; Cellular Component: mitochondrion (GO:0005739);;	K03687|1e-115|dre:559037|grpel1, MGC123352, zgc:123352	[O]	Posttranslational modification, protein turnover, chaperones	GrpE	GrpE protein homolog, mitochondrial (Precursor) GN=Roe1 OS=Drosophila melanogaster (Fruit fly) PE=2 SV=2	hypothetical protein CAPTEDRAFT_165833, partial [Capitella teleta]
c15158.graph_c0	2.12305	0.0491418	8.54825e-07	4.00491	up	--	--	--	--	--	--	Hemimethylated DNA-binding protein YccV like	--	F-box only protein 21 [Crassostrea gigas]
c15207.graph_c0	0	2.31597	2.55676e-06	-4.52969	down
c15215.graph_c0	5.93654	0	9.68559e-13	5.41194	up	--	--	--	K10400|1e-11|dre:573988|kif15, si:dkey-108k21.1, wu:fb96c12, wu:fc51g12, wu:fe01e02	[Z]	Cytoskeleton	Kinesin motor	--	--
c15217.graph_c0	0.569916	0.0890443	0.00641548	2.25418	up	--	--	--	--	--	--	Protein of unknown function (DUF1759)	--	PREDICTED: uncharacterized protein LOC100888364 [Strongylocentrotus purpuratus]
c15243.graph_c0	0	4.8536	0	-7.68586	down	[Q]	Secondary metabolites biosynthesis, transport and catabolism	--	--	[Q]	Secondary metabolites biosynthesis, transport and catabolism	Multicopper oxidase;; Multicopper oxidase;; Multicopper oxidase	--	laccase 2 [Gryllus bimaculatus]
c15266.graph_c0	0	1.19939	2.07332e-07	-4.72499	down	[R]	General function prediction only	--	K11294|1e-24|bfo:BRAFLDRAFT_268603|hypothetical protein	[R]	General function prediction only	RNA recognition motif. (a.k.a. RRM, RBD, or RNP domain);; RNA recognition motif (a.k.a. RRM, RBD, or RNP domain);; RNA recognition motif. (a.k.a. RRM, RBD, or RNP domain)	Polyadenylate-binding protein GN=pAbp OS=Drosophila melanogaster (Fruit fly) PE=1 SV=3	PREDICTED: LOW QUALITY PROTEIN: uncharacterized RNA-binding protein C660.15-like [Diaphorina citri]
c15306.graph_c0	1.83221	0	3.99625e-07	4.6238	up	--	--	--	--	[R]	General function prediction only	Hyaluronan / mRNA binding family	--	hypothetical protein TcasGA2_TC001877 [Tribolium castaneum]
c15317.graph_c0	1.83091	0.0381417	1.06719e-07	4.15153	up	--	--	Molecular Function: C-8 sterol isomerase activity (GO:0000247);; Cellular Component: endoplasmic reticulum (GO:0005783);; Biological Process: ergosterol biosynthetic process (GO:0006696);;	--	[T]	Signal transduction mechanisms	ERG2 and Sigma1 receptor like protein	Protein erg2 homolog GN=erg2 OS=Dictyostelium discoideum (Slime mold) PE=3 SV=1	PREDICTED: sigma non-opioid intracellular receptor 1-like [Aplysia californica]
c15365.graph_c0	3.16793	0.048885	1.03416e-10	4.57182	up	--	--	--	--	--	--	--	--	hypothetical protein CAPTEDRAFT_205511 [Capitella teleta]
c15370.graph_c0	4.05974	0.265327	1.29775e-07	3.3519	up	--	--	Molecular Function: structural constituent of ribosome (GO:0003735);; Cellular Component: ribosome (GO:0005840);; Biological Process: translation (GO:0006412);;	K02993|1e-130|dre:393725|rps7, MGC73216, zgc:73216	[J]	Translation, ribosomal structure and biogenesis	Ribosomal protein S7e	40S ribosomal protein S7 GN=RpS7 OS=Spodoptera frugiperda (Fall armyworm) PE=2 SV=1	ribosomal protein S7 [Branchiostoma belcheri]
c15398.graph_c0	3.39471	0.0297764	0	5.37103	up	[G]	Carbohydrate transport and metabolism	Molecular Function: sedoheptulose-7-phosphate:D-glyceraldehyde-3-phosphate glyceronetransferase activity (GO:0004801);; Cellular Component: cytoplasm (GO:0005737);; Biological Process: pentose-phosphate shunt (GO:0006098);;	K00616|0.0|dre:324556|taldo1, MGC56232, Tal, wu:fc32g02, zgc:56232, zgc:66054	[G]	Carbohydrate transport and metabolism	Transaldolase	Probable transaldolase GN=Tal OS=Drosophila melanogaster (Fruit fly) PE=2 SV=2	hypothetical protein BRAFLDRAFT_115715 [Branchiostoma floridae]
c15403.graph_c0	3.56722	0	0	6.72322	up	--	--	--	--	[R]	General function prediction only	3'-5' exonuclease	Werner Syndrome-like exonuclease OS=Drosophila virilis (Fruit fly) PE=3 SV=2	hypothetical protein BRAFLDRAFT_156042 [Branchiostoma floridae]
c15430.graph_c0	3.70722	0.149476	1.86274e-10	3.91673	up	[J]	Translation, ribosomal structure and biogenesis	Biological Process: mitotic spindle elongation (GO:0000022);; Molecular Function: protein tyrosine kinase activity (GO:0004713);; Cellular Component: microtubule associated complex (GO:0005875);; Cellular Component: plasma membrane (GO:0005886);; Biological Process: cellular response to DNA damage stimulus (GO:0006974);; Biological Process: actin filament organization (GO:0007015);; Biological Pr…	K04381|2e-80|dre:550548|stmn1b, fj43c10, wu:fj38b07, wu:fj43c10, zgc:110159	--	--	Stathmin family	Glutamic acid-rich protein (Precursor) GN=GARP OS=Plasmodium falciparum (isolate FC27 / Papua New Guinea) PE=4 SV=1	hypothetical protein BRAFLDRAFT_231109 [Branchiostoma floridae]
c15431.graph_c0	3.9006	0	2.17049e-06	4.49214	up	[J]	Translation, ribosomal structure and biogenesis	Biological Process: mitotic spindle elongation (GO:0000022);; Molecular Function: structural constituent of ribosome (GO:0003735);; Biological Process: translation (GO:0006412);; Cellular Component: cytosolic large ribosomal subunit (GO:0022625);; Molecular Function: metal ion binding (GO:0046872);;	K02921|2e-61|ecb:100050696|similar to ribosomal protein L37a	[J]	Translation, ribosomal structure and biogenesis	Ribosomal L37ae protein family	60S ribosomal protein L37a GN=RpL37A OS=Drosophila melanogaster (Fruit fly) PE=1 SV=3	ribosomal protein rpl37a [Eurythoe complanata]
c15469.graph_c0	3.06124	0.0864708	9.68288e-11	4.20997	up	--	--	Cellular Component: signal peptidase complex (GO:0005787);; Biological Process: signal peptide processing (GO:0006465);; Molecular Function: peptidase activity (GO:0008233);; Cellular Component: integral component of membrane (GO:0016021);;	K12947|1e-123|dre:541342|spcs2, wu:fa12g08, zgc:110364	[U]	Intracellular trafficking, secretion, and vesicular transport	Microsomal signal peptidase 25 kDa subunit (SPC25)	Signal peptidase complex subunit 2 GN=Spase25 OS=Drosophila melanogaster (Fruit fly) PE=2 SV=1	PREDICTED: probable signal peptidase complex subunit 2-like isoform X1 [Saccoglossus kowalevskii]
c15483.graph_c0	0	3.00168	2.53908e-13	-5.54025	down	--	--	--	--	--	--	Oxygen evolving enhancer protein 3 (PsbQ)	--	--
c15490.graph_c0	5.04109	0.25204	3.98902e-08	3.61399	up	[J]	Translation, ribosomal structure and biogenesis	Molecular Function: nucleotide binding (GO:0000166);; Molecular Function: structural constituent of ribosome (GO:0003735);; Cellular Component: ribosome (GO:0005840);; Biological Process: translation (GO:0006412);;	K02974|2e-85|gga:423726|RPS24	[J]	Translation, ribosomal structure and biogenesis	Ribosomal protein S24e	40S ribosomal protein S24 GN=RpS24 OS=Spodoptera frugiperda (Fall armyworm) PE=2 SV=1	PREDICTED: 40S ribosomal protein S24 [Tribolium castaneum]
c15492.graph_c0	5.24045	0	9.08162e-14	5.52855	up	--	--	--	--	--	--	EF-hand domain;; S-100/ICaBP type calcium binding domain	--	--
c15514.graph_c0	0	3.30976	2.53908e-13	-5.54025	down	--	--	--	--	--	--	Oxygen evolving enhancer protein 3 (PsbQ)	--	oxygen-evolving enhancer protein 3 [Bigelowiella natans]
c15526.graph_c0	0	4.64119	0	-6.26057	down	[P]	Inorganic ion transport and metabolism	Molecular Function: catalytic activity (GO:0003824);;	--	[P]	Inorganic ion transport and metabolism	Carbonic anhydrase	Beta carbonic anhydrase 1 GN=bca-1 OS=Caenorhabditis elegans PE=3 SV=1	PREDICTED: carbonic anhydrase 1-like [Ceratitis capitata]
c15529.graph_c0	2.13702	0	3.76497e-10	5.08634	up	--	--	--	--	--	--	--	Circumsporozoite protein (Precursor) OS=Plasmodium yoelii yoelii PE=1 SV=1	PREDICTED: leucine-rich repeat extensin-like protein 3 [Acromyrmex echinatior]
c15532.graph_c0	3.35735	0	4.92426e-11	5.20323	up	--	--	Molecular Function: oxidoreductase activity (GO:0016491);;	K10802|1e-113|oaa:100078150|similar to high-mobility group box 1	[R]	General function prediction only	HMG-box domain;; HMG (high mobility group) box	High mobility group protein DSP1 GN=Dsp1 OS=Drosophila melanogaster (Fruit fly) PE=2 SV=1	High mobility group protein B2 [Caligus rogercresseyi]
c15571.graph_c0	4.99049	0.106628	1.78781e-07	4.11625	up	[J]	Translation, ribosomal structure and biogenesis	Molecular Function: RNA binding (GO:0003723);; Molecular Function: structural constituent of ribosome (GO:0003735);; Biological Process: translation (GO:0006412);; Cellular Component: small ribosomal subunit (GO:0015935);;	K02989|8e-76|mmu:20103|Rps5, AA617411	[J]	Translation, ribosomal structure and biogenesis	Ribosomal protein S7p/S5e	40S ribosomal protein S5a GN=RpS5a OS=Drosophila melanogaster (Fruit fly) PE=1 SV=1	putative 40S ribosomal protein RPS5 [Novocrania anomala]
c15572.graph_c0	2.8237	0	0	6.3062	up	--	--	Molecular Function: catalytic activity (GO:0003824);;	--	[G]	Carbohydrate transport and metabolism	--	--	hypothetical protein HELRODRAFT_159582 [Helobdella robusta]
c15583.graph_c0	2.86348	0.0245989	0	5.40065	up	--	--	Biological Process: metabolic process (GO:0008152);; Molecular Function: hydrolase activity (GO:0016787);;	K01183|0.0|dre:406819|MGC55406, wu:fd61a02, wu:fi13f01, zgc:77912	[G]	Carbohydrate transport and metabolism	Glycosyl hydrolases family 18;; Chitin binding Peritrophin-A domain	Probable endochitinase GN=cht-1 OS=Caenorhabditis elegans PE=1 SV=1	chitinase-3 [Hyriopsis cumingii]
c15588.graph_c0	2.38986	0.0568981	1.44827e-06	3.96581	up	--	--	--	--	[D]	Cell cycle control, cell division, chromosome partitioning	SAP domain	--	hypothetical protein BRAFLDRAFT_126497 [Branchiostoma floridae]
c15593.graph_c0	4.4496	0.111512	0	4.71087	up	--	--	Biological Process: action potential (GO:0001508);; Molecular Function: ATP:ADP antiporter activity (GO:0005471);; Cellular Component: mitochondrial inner membrane (GO:0005743);; Cellular Component: lipid particle (GO:0005811);; Biological Process: mitochondrial transport (GO:0006839);; Biological Process: flight behavior (GO:0007629);; Biological Process: determination of adult lifespan (GO:0008…	K05863|0.0|dre:192321|slc25a5, CHUNP6931, SI:bZ46J2.1, SI:bZ46J2.3, SI:bZ46J2.5, SI:bZ46J2.6, SI:bZ46J2.7, SI:bZ46J2.9, si:bz46j2.2, sr:nyz040, wu:fe06b05	[C]	Energy production and conversion	Mitochondrial carrier protein	ADP,ATP carrier protein GN=sesB OS=Drosophila melanogaster (Fruit fly) PE=2 SV=4	ADP/ATP translocase [Latrodectus hesperus]
c15596.graph_c0	2.16292	0	3.84426e-06	4.44544	up
c15599.graph_c0	4.54833	0	6.30877e-10	5.05557	up	[J]	Translation, ribosomal structure and biogenesis	Molecular Function: structural constituent of ribosome (GO:0003735);; Cellular Component: ribosome (GO:0005840);; Biological Process: translation (GO:0006412);;	K02894|6e-97|dre:336812|rpl23, MGC73149, fb06e03, wu:fb06e03, zgc:73149	[J]	Translation, ribosomal structure and biogenesis	Ribosomal protein L14p/L23e	60S ribosomal protein L23 GN=RpL23-C OS=Aedes aegypti (Yellowfever mosquito) PE=2 SV=1	hypothetical protein BRAFLDRAFT_123946 [Branchiostoma floridae]
c15646.graph_c0	4.9207	0.0386825	0	5.52692	up	--	--	Molecular Function: protein domain specific binding (GO:0019904);;	K06630|3e-21|oaa:100077972|similar to factor activating exoenzyme S	[O]	Posttranslational modification, protein turnover, chaperones	14-3-3 protein	14-3-3 protein zeta GN=14-3-3zeta OS=Bombyx mori (Silk moth) PE=2 SV=2	14-3-3 protein epsilon isoform-like protein [Artemia franciscana]
c15672.graph_c0	0	5.31271	0	-6.90117	down	--	--	Cellular Component: photosystem II (GO:0009523);; Biological Process: photosynthesis (GO:0015979);;	--	--	--	Manganese-stabilising protein / photosystem II polypeptide	--	photosystem II oxygen evolving enhancer protein 1 [Gymnochlora stellata]
c15700.graph_c0	3.48612	0.061807	3.11273e-09	4.37693	up	--	--	--	--	[TU]	--	cAMP-regulated phosphoprotein/endosulfine conserved region	--	hypothetical protein BRAFLDRAFT_124375 [Branchiostoma floridae]
c15710.graph_c0	2.70438	0	2.5609e-08	4.81961	up	--	--	--	K13092|7e-08|mdo:100018735|similar to conserved nuclear protein NHN1	[A]	RNA processing and modification	--	--	hypothetical protein PTSG_01932 [Salpingoeca rosetta]
c15745.graph_c0	2.12768	0	2.18657e-05	4.29552	up	[J]	Translation, ribosomal structure and biogenesis	Cellular Component: nucleolus (GO:0005730);; Cellular Component: small nucleolar ribonucleoprotein complex (GO:0005732);; Molecular Function: snoRNA binding (GO:0030515);; Biological Process: rRNA pseudouridine synthesis (GO:0031118);;	K11129|2e-83|dre:100003787|nhp2, MGC73227, nola2, wu:fb36b10, wu:fd61a03, zgc:73227	[A]	RNA processing and modification	Ribosomal protein L7Ae/L30e/S12e/Gadd45 family	H/ACA ribonucleoprotein complex subunit 2-like protein OS=Branchiostoma belcheri (Amphioxus) PE=2 SV=1	hypothetical protein BRAFLDRAFT_60258 [Branchiostoma floridae]
c15753.graph_c0	2.19029	0	0	7.07729	up	--	--	--	--	[T]	Signal transduction mechanisms	Low-density lipoprotein receptor domain class A;; Low-density lipoprotein receptor repeat class B;; Coagulation Factor Xa inhibitory site;; Complement Clr-like EGF-like;; Calcium-binding EGF domain	Low-density lipoprotein receptor-related protein (Precursor) GN=lrp-1 OS=Caenorhabditis elegans PE=1 SV=1	PREDICTED: low-density lipoprotein receptor-related protein 4-like [Aplysia californica]
c15768.graph_c0	6.21831	0	0	6.41927	up	[J]	Translation, ribosomal structure and biogenesis	Molecular Function: structural constituent of ribosome (GO:0003735);; Biological Process: translation (GO:0006412);; Cellular Component: cytosolic small ribosomal subunit (GO:0022627);;	K02984|0.0|xtr:493437|rps3a, MGC79742, fte1, mftl	[J]	Translation, ribosomal structure and biogenesis	Ribosomal S3Ae family	40S ribosomal protein S3a {ECO:0000255|HAMAP-Rule:MF_03122} OS=Eimeria tenella (Coccidian parasite) PE=2 SV=3	RecName: Full=40S ribosomal protein S3a; AltName: Full=EtS3a [Eimeria tenella]
c15790.graph_c0	1.70272	0.0746762	2.14736e-06	3.59356	up	[J]	Translation, ribosomal structure and biogenesis	--	--	[AJ]	--	Putative snoRNA binding domain	Uncharacterized NOP5 family protein K07C5.4 GN=K07C5.4 OS=Caenorhabditis elegans PE=3 SV=1	hypothetical protein BRAFLDRAFT_85513 [Branchiostoma floridae]
c15791.graph_c0	2.66489	0.0457859	0	4.91413	up	[LKJ]	--	Molecular Function: translation initiation factor activity (GO:0003743);; Molecular Function: ATP binding (GO:0005524);; Biological Process: translational initiation (GO:0006413);; Molecular Function: ATP-dependent helicase activity (GO:0008026);;	K03257|0.0|tgu:100230686|eukaryotic translation initiation factor 4A2	[J]	Translation, ribosomal structure and biogenesis	DEAD/DEAH box helicase;; Helicase conserved C-terminal domain	Eukaryotic initiation factor 4A GN=eIF-4a OS=Drosophila melanogaster (Fruit fly) PE=1 SV=3	Eukaryotic initiation factor 4A-II, partial [Stegodyphus mimosarum]
c15843.graph_c0	5.52499	0.0155537	0	6.99638	up	[RTKL]	--	Molecular Function: calmodulin-dependent protein kinase activity (GO:0004683);; Molecular Function: myosin light chain kinase activity (GO:0004687);; Cellular Component: microtubule associated complex (GO:0005875);;	--	[Z]	Cytoskeleton	Protein kinase domain;; Immunoglobulin I-set domain;; Protein tyrosine kinase;; Immunoglobulin domain;; Immunoglobulin domain;; Fibronectin type III domain;; Immunoglobulin V-set domain;; Immunoglobulin domain;; Immunoglobulin C1-set domain;; CD80-like C2-set immunoglobulin domain;; RIO1 family;; Alphaherpesvirus glycoprotein E	Twitchin {ECO:0000303|PubMed:7190524} OS=Caenorhabditis elegans PE=1 SV=3	PREDICTED: myosin light chain kinase, smooth muscle [Ciona intestinalis]
c15853.graph_c0	0	6.46625	1.33227e-15	-5.78765	down
c15868.graph_c0	2.67282	0	6.99841e-07	4.58123	up	[J]	Translation, ribosomal structure and biogenesis	Molecular Function: RNA binding (GO:0003723);; Molecular Function: structural constituent of ribosome (GO:0003735);; Biological Process: translation (GO:0006412);; Cellular Component: large ribosomal subunit (GO:0015934);;	K02865|1e-118|ecb:100053449|hypothetical LOC100053449	[J]	Translation, ribosomal structure and biogenesis	Ribosomal protein L1p/L10e family	60S ribosomal protein L10a GN=RpL10A OS=Spodoptera frugiperda (Fall armyworm) PE=2 SV=1	putative 60S ribosomal protein L10A [Latrodectus hesperus]
c15869.graph_c0	0	3.02408	1.81511e-08	-4.89697	down	--	--	--	--	--	--	Photosystem I psaG / psaK	--	--
c15888.graph_c0	3.1252	0	6.66134e-16	5.75607	up	--	--	--	--	--	--	F-box associated region	--	hypothetical protein BRAFLDRAFT_123802 [Branchiostoma floridae]
c15894.graph_c0	3.65859	0	8.74304e-09	4.89106	up	[J]	Translation, ribosomal structure and biogenesis	Biological Process: mitotic spindle elongation (GO:0000022);; Cellular Component: nuclear chromosome (GO:0000228);; Molecular Function: structural constituent of ribosome (GO:0003735);; Cellular Component: nucleolus (GO:0005730);; Biological Process: translation (GO:0006412);; Molecular Function: rRNA binding (GO:0019843);; Cellular Component: cytosolic small ribosomal subunit (GO:0022627);;	K02997|1e-114|xla:444236|rps9, MGC80804	[J]	Translation, ribosomal structure and biogenesis	Ribosomal protein S4/S9 N-terminal domain;; S4 domain	40S ribosomal protein S9 GN=RpS9 OS=Drosophila melanogaster (Fruit fly) PE=1 SV=2	ribosomal protein S9 [Ochlerotatus taeniorhynchus]
c15896.graph_c0	4.63052	0	5.13436e-09	4.9255	up	[J]	Translation, ribosomal structure and biogenesis	Molecular Function: nucleotide binding (GO:0000166);; Molecular Function: structural constituent of ribosome (GO:0003735);; Cellular Component: ribosome (GO:0005840);; Biological Process: translation (GO:0006412);;	K02893|7e-93|dre:335539|rpl23a, MGC110139, wu:fa93f05, wu:fj20e05, zgc:110139	[J]	Translation, ribosomal structure and biogenesis	Ribosomal protein L23, N-terminal domain;; Ribosomal protein L23	60S ribosomal protein L23a 2 GN=rpl-25.2 OS=Caenorhabditis elegans PE=3 SV=1	ribosomal protein L23a [Branchiostoma belcheri]
c15897.graph_c0	3.22049	0	0	6.2117	up	--	--	Cellular Component: extracellular region (GO:0005576);; Molecular Function: growth factor activity (GO:0008083);; Biological Process: growth (GO:0040007);;	K05495|1e-139|dre:30125|dvr1, DVR-1, VG1, cb556, zDVR-1, zDVR1, zgc:103542	[T]	Signal transduction mechanisms	Transforming growth factor beta like domain;; TGF-beta propeptide	Univin (Precursor) OS=Strongylocentrotus purpuratus (Purple sea urchin) PE=2 SV=2	hypothetical protein BRAFLDRAFT_278638 [Branchiostoma floridae]
c15907.graph_c0	0	3.19969	6.98795e-11	-5.24146	down	--	--	--	--	--	--	Hydrophobic seed protein;; Protease inhibitor/seed storage/LTP family	--	--
c15920.graph_c0	0	2.94569	0	-6.23514	down	[G]	Carbohydrate transport and metabolism	Molecular Function: catalytic activity (GO:0003824);;	--	[G]	Carbohydrate transport and metabolism	Fructose-bisphosphate aldolase class-I	Fructose-bisphosphate aldolase GN=fba OS=Dictyostelium discoideum (Slime mold) PE=3 SV=1	fructose-1,6-bisphosphate aldolase, putative [Perkinsus marinus ATCC 50983]
c15924.graph_c0	1.48897	0	3.02513e-09	4.95913	up	--	--	--	--	--	--	Prothymosin/parathymosin family	Serrate RNA effector molecule homolog GN=Ars2 OS=Aedes aegypti (Yellowfever mosquito) PE=3 SV=1	hypothetical protein CAPTEDRAFT_197503 [Capitella teleta]
c15933.graph_c0	2.1588	0	9.10383e-15	5.63643	up	--	--	Cellular Component: nucleosome (GO:0000786);; Molecular Function: DNA binding (GO:0003677);; Cellular Component: nucleus (GO:0005634);; Biological Process: nucleosome assembly (GO:0006334);; Molecular Function: protein heterodimerization activity (GO:0046982);;	K11251|8e-80|tgu:100226437|H2A histone family, member V	[B]	Chromatin structure and dynamics	Core histone H2A/H2B/H3/H4	Histone H2A.V (Fragment) GN=H2A.F/Z OS=Strongylocentrotus purpuratus (Purple sea urchin) PE=1 SV=1	histone variant H2A.Z [Mytilus galloprovincialis]
c15943.graph_c0	5.43251	0.0870543	2.70047e-10	4.51877	up	[J]	Translation, ribosomal structure and biogenesis	Molecular Function: RNA binding (GO:0003723);; Molecular Function: structural constituent of ribosome (GO:0003735);; Biological Process: translation (GO:0006412);; Cellular Component: small ribosomal subunit (GO:0015935);;	K02985|7e-97|mdo:100010657|hypothetical protein LOC100010657	[J]	Translation, ribosomal structure and biogenesis	KH domain;; Ribosomal protein S3, C-terminal domain	40S ribosomal protein S3 GN=RpS3 OS=Manduca sexta (Tobacco hawkmoth) PE=2 SV=1	PREDICTED: 40S ribosomal protein S3-B-like [Aplysia californica]
c15944.graph_c0	2.60194	0	1.78821e-09	4.992	up
c15967.graph_c0	9.85561	0.0345064	0	6.68339	up	--	--	--	--	--	--	Zinc-binding domain	--	hypothetical protein BRAFLDRAFT_118679 [Branchiostoma floridae]
c15969.graph_c0	0	2.82277	6.99285e-09	-4.9604	down	[J]	Translation, ribosomal structure and biogenesis	Cellular Component: intracellular (GO:0005622);;	K02889|7e-58|api:100165759|similar to putative ribosomal protein L21	[J]	Translation, ribosomal structure and biogenesis	Ribosomal protein L21e	60S ribosomal protein L21 GN=rpl21 OS=Dictyostelium discoideum (Slime mold) PE=3 SV=1	60S ribosomal protein L21-like [Acyrthosiphon pisum]
c15970.graph_c0	4.97868	0.0610097	0	5.3958	up	[J]	Translation, ribosomal structure and biogenesis	Molecular Function: structural constituent of ribosome (GO:0003735);; Cellular Component: ribosome (GO:0005840);; Biological Process: translation (GO:0006412);;	K02930|0.0|dre:337090|rpl4, fa97a02, fl04b10, wu:fa97a02, wu:fa97c01, wu:fl04b10, zgc:56659, zgc:85693	[A]	RNA processing and modification	Ribosomal protein L4/L1 family;; 60S ribosomal protein L4 C-terminal domain	60S ribosomal protein L4 GN=RPL4 OS=Urechis caupo (Innkeeper worm) PE=2 SV=1	PREDICTED: 60S ribosomal protein L4-B-like [Saccoglossus kowalevskii]
c15985.graph_c0	3.20177	0	1.35339e-10	5.14597	up	[O]	Posttranslational modification, protein turnover, chaperones	Molecular Function: nucleotide binding (GO:0000166);; Biological Process: cell cycle (GO:0007049);; Molecular Function: acid-amino acid ligase activity (GO:0016881);;	K06688|1e-98|dre:566441|MGC123190	[O]	Posttranslational modification, protein turnover, chaperones	Ubiquitin-conjugating enzyme	Ubiquitin-conjugating enzyme E2 C GN=UBE2C OS=Spisula solidissima (Atlantic surf-clam) PE=1 SV=1	Ubiquitin-conjugating enzyme E2 C [Caligus rogercresseyi]
c16019.graph_c0	3.76048	0	1.35339e-10	5.14597	up	--	--	Cellular Component: nucleosome (GO:0000786);; Molecular Function: DNA binding (GO:0003677);; Cellular Component: lipid particle (GO:0005811);; Biological Process: nucleosome assembly (GO:0006334);; Cellular Component: NuA4 histone acetyltransferase complex (GO:0035267);; Molecular Function: protein heterodimerization activity (GO:0046982);;	K11252|9e-78|dre:386920|hist2h2l, fj05g08, wu:fj05g08, zgc:73093	[B]	Chromatin structure and dynamics	Core histone H2A/H2B/H3/H4;; Histone-like transcription factor (CBF/NF-Y) and archaeal histone	Histone H2B GN=H2B OS=Sipunculus nudus (Marine worm) PE=1 SV=2	Histone H2B 7 [Crassostrea gigas]
c16034.graph_c0	0.18656	1.76185	0.000429428	-2.91537	down
c16040.graph_c0	6.11709	0.0999466	0	4.98564	up	[J]	Translation, ribosomal structure and biogenesis	Cellular Component: intracellular (GO:0005622);;	K02934|1e-144|gga:373957|RPL6	[J]	Translation, ribosomal structure and biogenesis	Ribosomal protein L6e;; Ribosomal protein L6, N-terminal domain	60S ribosomal protein L6 GN=rpl6 OS=Dictyostelium discoideum (Slime mold) PE=1 SV=1	PREDICTED: 60S ribosomal protein L6 isoform X2 [Ciona intestinalis]
c16045.graph_c0	1.39215	0.112263	0.000337511	2.94813	up
c16065.graph_c0	1.24566	0.0199613	2.70047e-10	4.51877	up	[LKJ]	--	Molecular Function: translation initiation factor activity (GO:0003743);; Molecular Function: ATP binding (GO:0005524);; Biological Process: translational initiation (GO:0006413);; Molecular Function: ATP-dependent helicase activity (GO:0008026);;	K03257|0.0|tgu:100230686|eukaryotic translation initiation factor 4A2	[J]	Translation, ribosomal structure and biogenesis	DEAD/DEAH box helicase;; Helicase conserved C-terminal domain	Eukaryotic initiation factor 4A GN=eIF-4a OS=Drosophila melanogaster (Fruit fly) PE=1 SV=3	Eukaryotic initiation factor 4A-II, partial [Stegodyphus mimosarum]
c16099.graph_c0	1.16764	0	1.23016e-06	4.53737	up	[C]	Energy production and conversion	Molecular Function: retinal dehydrogenase activity (GO:0001758);; Molecular Function: aldehyde dehydrogenase (NAD) activity (GO:0004029);; Cellular Component: mitochondrial matrix (GO:0005759);; Cellular Component: lipid particle (GO:0005811);; Biological Process: pyruvate metabolic process (GO:0006090);; Biological Process: acetaldehyde metabolic process (GO:0006117);; Molecular Function: acetal…	K00128|0.0|dre:100332355|aldh2l	[C]	Energy production and conversion	Aldehyde dehydrogenase family	Aldehyde dehydrogenase GN=ALDH OS=Enchytraeus buchholzi (Grindal worm) PE=2 SV=1	Aldehyde dehydrogenase, mitochondrial [Crassostrea gigas]
c16255.graph_c0	1.37261	0	1.81298e-11	5.25831	up	--	--	Biological Process: negative regulation of transcription from RNA polymerase II promoter (GO:0000122);; Molecular Function: RNA polymerase II regulatory region sequence-specific DNA binding (GO:0000977);; Molecular Function: RNA polymerase II transcription corepressor activity (GO:0001106);; Biological Process: mesodermal cell fate commitment (GO:0001710);; Cellular Component: nucleus (GO:0005634…	--	--	--	Fascin domain;; FRG1-like family;; Fibroblast growth factor;; Protein of unknown function (DUF569)	Protein singed GN=sn OS=Drosophila melanogaster (Fruit fly) PE=3 SV=1	PREDICTED: fascin-like [Ciona intestinalis]
c16273.graph_c0	17.9614	0.258862	0	5.77118	up	[D]	Cell cycle control, cell division, chromosome partitioning	Biological Process: cell cycle (GO:0007049);;	K05868|0.0|dre:58025|ccnb1, cb267, ccnb, cycb, cycb1, wu:fa19g04, wu:fb16d01, wu:fb16e07, wu:fi21c01	[D]	Cell cycle control, cell division, chromosome partitioning	Cyclin, N-terminal domain;; Cyclin, C-terminal domain	G2/mitotic-specific cyclin-B OS=Patella vulgata (Common limpet) PE=2 SV=1	hypothetical protein LOTGIDRAFT_164886 [Lottia gigantea]
c16284.graph_c0	1.27335	0.0252634	3.83445e-08	4.2196	up	[L]	Replication, recombination and repair	Molecular Function: DNA binding (GO:0003677);; Molecular Function: DNA helicase activity (GO:0003678);; Molecular Function: ATP binding (GO:0005524);; Cellular Component: nucleus (GO:0005634);; Biological Process: DNA replication initiation (GO:0006270);; Biological Process: DNA duplex unwinding (GO:0032508);; Cellular Component: MCM complex (GO:0042555);;	K02210|0.0|dre:192333|mcm7, chunp6911, nyz175, sr:nyz175	[L]	Replication, recombination and repair	MCM2/3/5 family;; Magnesium chelatase, subunit ChlI;; AAA domain (dynein-related subfamily)	DNA replication licensing factor Mcm7 GN=Mcm7 OS=Drosophila melanogaster (Fruit fly) PE=1 SV=1	DNA replication licensing factor mcm7 [Crassostrea gigas]
c16494.graph_c0	1.24594	0.0415289	0.000329727	3.50233	up	--	--	--	K14295|1e-82|dre:322969|nup50, wu:fa56e03, wu:fb78a08	[U]	Intracellular trafficking, secretion, and vesicular transport	NUP50 (Nucleoporin 50 kDa)	Rho GTPase-activating protein gacK (Precursor) GN=gacK OS=Dictyostelium discoideum (Slime mold) PE=3 SV=1	hypothetical protein BRAFLDRAFT_129561 [Branchiostoma floridae]
c16501.graph_c0	1.24574	0	1.22009e-05	4.34724	up	--	--	--	--	[O]	Posttranslational modification, protein turnover, chaperones	CS domain	Uncharacterized protein ZC395.10 GN=ZC395.10 OS=Caenorhabditis elegans PE=3 SV=1	nuclear progesterone receptor [Penaeus monodon]
c16503.graph_c0	1.42387	0	2.25386e-10	5.11646	up	--	--	--	--	[T]	Signal transduction mechanisms	PDZ domain (Also known as DHR or GLGF);; PDZ domain	Disks large 1 tumor suppressor protein GN=dlg1 OS=Drosophila melanogaster (Fruit fly) PE=1 SV=2	PREDICTED: tight junction protein ZO-2 [Ciona intestinalis]
c16531.graph_c0	1.48807	0.0399995	1.22771e-05	3.79784	up	--	--	Molecular Function: binding (GO:0005488);; Biological Process: single-organism process (GO:0044699);;	K12490|8e-53|dre:100005008|ArfGAP with RhoGAP domain, ankyrin repeat and PH domain 2-like	[TZ]	--	RhoGAP domain	WW domain-containing protein tag-325 GN=tag-325 OS=Caenorhabditis elegans PE=3 SV=1	Arf-GAP with Rho-GAP domain, ANK repeat and PH domain-containing protein 2 [Crassostrea gigas]
c16584.graph_c0	0	0.953284	1.81511e-08	-4.89697	down	--	--	--	--	[R]	General function prediction only	--	GDP-D-glucose phosphorylase 1 GN=gdpgp1 OS=Caenorhabditis elegans PE=1 SV=1	hypothetical protein LOTGIDRAFT_225290 [Lottia gigantea]
c16593.graph_c0	7.20284	0	0	7.02266	up	[R]	General function prediction only	Molecular Function: kinase activity (GO:0016301);; Biological Process: phosphorylation (GO:0016310);;	--	[T]	Signal transduction mechanisms	WD domain, G-beta repeat;; Eukaryotic translation initiation factor eIF2A	Guanine nucleotide-binding protein subunit beta-2-like 1 OS=Biomphalaria glabrata (Bloodfluke planorb) PE=2 SV=1	PREDICTED: guanine nucleotide-binding protein subunit beta-2-like 1-like [Saccoglossus kowalevskii]
c16620.graph_c0	14.2379	2.80757	6.95768e-08	2.12486	up	--	--	--	K11275|3e-27|dre:550353|wu:fb40a10	[B]	Chromatin structure and dynamics	linker histone H1 and H5 family	Histone H1B OS=Chironomus tentans (Midge) PE=3 SV=1	histone 1 [Ornithodoros coriaceus]
c16640.graph_c0	1.80274	0	2.18657e-05	4.29552	up	--	--	Cellular Component: pericentriolar material (GO:0000242);; Biological Process: cytokinesis (GO:0000910);; Cellular Component: cytoplasmic mRNA processing body (GO:0000932);; Cellular Component: endoplasmic reticulum (GO:0005783);; Biological Process: mitotic spindle organization (GO:0007052);; Biological Process: cell death (GO:0008219);; Biological Process: embryo development ending in birth or …	--	[U]	Intracellular trafficking, secretion, and vesicular transport	Scd6-like Sm domain	--	Protein LSM14-like protein, partial [Stegodyphus mimosarum]
c16678.graph_c0	9.96603	0.309486	0	4.53598	up	--	--	Cellular Component: nucleosome (GO:0000786);; Molecular Function: DNA binding (GO:0003677);; Cellular Component: nucleus (GO:0005634);; Biological Process: nucleosome assembly (GO:0006334);; Molecular Function: protein heterodimerization activity (GO:0046982);;	--	[B]	Chromatin structure and dynamics	Core histone H2A/H2B/H3/H4	Histone H2A, orphon OS=Chironomus thummi thummi (Midge) PE=3 SV=2	PREDICTED: histone H2A-like [Hydra vulgaris]
c16688.graph_c0	1.4707	0	1.35339e-10	5.14597	up	--	--	--	K11518|0.0|dre:322645|tomm40, wu:fb68h07, zgc:64168	[U]	Intracellular trafficking, secretion, and vesicular transport	Eukaryotic porin;; Eukaryotic porin	Mitochondrial import receptor subunit TOM40 homolog 1 GN=Tom40 OS=Drosophila melanogaster (Fruit fly) PE=2 SV=2	hypothetical protein BRAFLDRAFT_93033 [Branchiostoma floridae]
c16773.graph_c0	1.42768	0	3.84426e-06	4.44544	up	--	--	Cellular Component: membrane (GO:0016020);;	K05689|1e-96|dre:114424|cdh1, E-cadherin	[S]	Function unknown	Cadherin cytoplasmic region	Neural-cadherin (Precursor) GN=CadN OS=Drosophila melanogaster (Fruit fly) PE=1 SV=2	cadherin precursor [Ciona intestinalis]
c16800.graph_c0	1.06565	0	1.22009e-05	4.34724	up	--	--	Biological Process: protein transport (GO:0015031);;	K12194|1e-110|dre:550542|chmp4c, zgc:110173	[U]	Intracellular trafficking, secretion, and vesicular transport	Snf7	Charged multivesicular body protein 4 GN=chmp4 OS=Dictyostelium discoideum (Slime mold) PE=3 SV=1	hypothetical protein BRAFLDRAFT_221857 [Branchiostoma floridae]
c16840.graph_c0	6.0657	0.0459496	0	5.57968	up	--	--	--	K06635|4e-26|dre:566690|hypothetical LOC566690	--	--	--	--	--
c16854.graph_c0	20.9178	0	0	7.01469	up	[C]	Energy production and conversion	Cellular Component: mitochondrion (GO:0005739);; Molecular Function: lipid binding (GO:0008289);; Molecular Function: hydrogen ion transmembrane transporter activity (GO:0015078);; Biological Process: ATP synthesis coupled proton transport (GO:0015986);; Biological Process: ATP hydrolysis coupled proton transport (GO:0015991);; Cellular Component: integral component of membrane (GO:0016021);; Mol…	K02128|1e-25|dre:767764|MGC153316	--	--	ATP synthase subunit C	ATP synthase lipid-binding protein, mitochondrial (Precursor) OS=Manduca sexta (Tobacco hawkmoth) PE=2 SV=1	ATP synthase F0 subunit c (mitochondrion) [Malawimonas californiana]
c16889.graph_c0	21.0749	0.0412239	0	7.51956	up	--	--	--	--	--	--	--	Uncharacterized protein DDB_G0271670 (Precursor) GN=DDB_G0271670 OS=Dictyostelium discoideum (Slime mold) PE=3 SV=1	hypothetical protein AND_000348 [Anopheles darlingi]
c16984.graph_c0	1.47501	0	8.74304e-09	4.89106	up	--	--	--	--	[R]	General function prediction only	Tetraspanin family	23 kDa integral membrane protein OS=Schistosoma japonicum (Blood fluke) PE=2 SV=1	hypothetical protein CAPTEDRAFT_169938 [Capitella teleta]
c17001.graph_c0	1.11886	0	3.99625e-07	4.6238	up	--	--	Molecular Function: signal transducer activity (GO:0004871);; Biological Process: single-organism process (GO:0044699);; Biological Process: response to stimulus (GO:0050896);;	K04257|6e-77|xtr:100486975|olfactory receptor 52A1-like	--	--	7 transmembrane receptor (rhodopsin family);; Olfactory receptor;; Serpentine type 7TM GPCR chemoreceptor Srsx	Olfactory receptor-like protein HbT3 (Fragment) OS=Apis mellifera ligustica (Common honeybee) PE=2 SV=1	hypothetical protein BRAFLDRAFT_92979 [Branchiostoma floridae]
c17040.graph_c0	10.0718	0.762973	4.5566e-09	3.26718	up
c17120.graph_c0	21.6292	0	0	6.86304	up
c17255.graph_c0	1.21869	0	4.40538e-08	4.78252	up	[J]	Translation, ribosomal structure and biogenesis	--	--	[J]	Translation, ribosomal structure and biogenesis	Mitochondrial small ribosomal subunit Rsm22	--	PREDICTED: methyltransferase-like protein 17, mitochondrial-like [Strongylocentrotus purpuratus]
c17368.graph_c0	1.42651	0	2.17049e-06	4.49214	up	--	--	Molecular Function: nucleic acid binding (GO:0003676);;	K11135|1e-110|dre:368253|pinx1, cb342, zLPTS	[AD]	--	G-patch domain;; DExH-box splicing factor binding site	Uncharacterized G-patch domain protein DDB_G0278987 GN=DDB_G0278987 OS=Dictyostelium discoideum (Slime mold) PE=3 SV=1	PinX1 [Moina rectirostris]
c17590.graph_c0	16.6796	2.21118	3.63919e-11	2.66636	up
c17852.graph_c0	34.6195	0.124345	0	6.64677	up	--	--	--	--	[P]	Inorganic ion transport and metabolism	Metallothionein	Metallothionein 20-III isoform B OS=Mytilus edulis (Blue mussel) PE=1 SV=1	metallothionein [Tegillarca granosa]
c17933.graph_c0	0.989682	0.0392708	2.95648e-07	3.73307	up	--	--	--	--	--	--	Perilipin family;; A20-like zinc finger	--	hypothetical protein DAPPUDRAFT_199969 [Daphnia pulex]
c17968.graph_c0	2.93762	0	6.75238e-12	5.31136	up	[J]	Translation, ribosomal structure and biogenesis	Molecular Function: translation initiation factor activity (GO:0003743);; Cellular Component: cytoplasm (GO:0005737);; Biological Process: translational initiation (GO:0006413);;	K03259|1e-132|dre:79380|eif4e, eif4e-1, eif4e1a, zgc:86680	[J]	Translation, ribosomal structure and biogenesis	Eukaryotic initiation factor 4E	Eukaryotic translation initiation factor 4E OS=Aplysia californica (California sea hare) PE=1 SV=1	hypothetical protein BRAFLDRAFT_120045 [Branchiostoma floridae]
c18023.graph_c0	1.87022	0	1.23016e-06	4.53737	up	[T]	Signal transduction mechanisms	Cellular Component: protein phosphatase type 2A complex (GO:0000159);; Molecular Function: protein serine/threonine phosphatase activity (GO:0004722);; Cellular Component: centriole (GO:0005814);; Biological Process: protein dephosphorylation (GO:0006470);; Biological Process: phagocytosis (GO:0006909);; Biological Process: actin filament organization (GO:0007015);; Biological Process: chromosome…	K04382|1e-144|dre:406582|ppp2cb, fb17h07, fc05c02, fk24a01, wu:fb17h07, wu:fc05c02, wu:fk24a01, zgc:55808, zgc:77172	[T]	Signal transduction mechanisms	Calcineurin-like phosphoesterase	Serine/threonine-protein phosphatase PP2A GN=mts OS=Drosophila melanogaster (Fruit fly) PE=2 SV=1	GH10208 [Drosophila grimshawi]
c18032.graph_c0	0	1.47145	5.61004e-07	-4.65001	down	[O]	Posttranslational modification, protein turnover, chaperones	Molecular Function: ATP binding (GO:0005524);; Biological Process: response to stress (GO:0006950);;	--	[O]	Posttranslational modification, protein turnover, chaperones	Hsp70 protein	Heat shock 70 kDa protein GN=HSP70 OS=Brugia malayi (Filarial nematode worm) PE=3 SV=1	high molecular weight heat shock protein [Acanthamoeba castellanii str. Neff]
c18115.graph_c0	1.14627	0	1.22009e-05	4.34724	up	[U]	Intracellular trafficking, secretion, and vesicular transport	Biological Process: intracellular protein transport (GO:0006886);; Biological Process: nucleocytoplasmic transport (GO:0006913);; Molecular Function: Ran GTPase binding (GO:0008536);; Molecular Function: protein transporter activity (GO:0008565);;	K14293|0.0|dre:570700|kpnb1, MGC123184, wu:fc12b10, zgc:123184	[YU]	--	--	Importin subunit beta GN=Fs(2)Ket OS=Drosophila melanogaster (Fruit fly) PE=2 SV=2	PREDICTED: LOW QUALITY PROTEIN: importin subunit beta-1-like [Saccoglossus kowalevskii]
c18142.graph_c0	6.8492	0.109757	2.70047e-10	4.51877	up	[J]	Translation, ribosomal structure and biogenesis	Cellular Component: ribosome (GO:0005840);;	K02937|9e-65|dre:336710|rpl7, bb02h10, mg:bb02h10, wu:fa93c11	[J]	Translation, ribosomal structure and biogenesis	--	60S ribosomal protein L7 GN=rpl7 OS=Dictyostelium discoideum (Slime mold) PE=1 SV=3	predicted protein [Nematostella vectensis]
c18142.graph_c1	12.2057	0	0	6.34489	up	[J]	Translation, ribosomal structure and biogenesis	Cellular Component: ribosome (GO:0005840);;	K02937|1e-78|dre:336710|rpl7, bb02h10, mg:bb02h10, wu:fa93c11	[J]	Translation, ribosomal structure and biogenesis	Ribosomal L30 N-terminal domain;; Ribosomal protein L30p/L7e	60S ribosomal protein L7 GN=RpL7 OS=Drosophila melanogaster (Fruit fly) PE=1 SV=2	hypothetical protein BRAFLDRAFT_125387 [Branchiostoma floridae]
c18198.graph_c0	1.48335	0.0252255	1.1616e-09	4.43535	up	[Z]	Cytoskeleton	Molecular Function: microtubule motor activity (GO:0003777);; Molecular Function: ATP binding (GO:0005524);; Cellular Component: kinesin complex (GO:0005871);; Cellular Component: microtubule (GO:0005874);; Biological Process: microtubule-based movement (GO:0007018);; Molecular Function: microtubule binding (GO:0008017);;	K10393|1e-153|dre:100136875|si:ch211-61f14.1	[Z]	Cytoskeleton	Kinesin motor domain	Kinesin-like protein Klp10A GN=Klp10A OS=Drosophila melanogaster (Fruit fly) PE=1 SV=1	PREDICTED: kinesin-like protein KIF2A-like [Strongylocentrotus purpuratus]
c18219.graph_c0	1.23761	0	6.99841e-07	4.58123	up	[J]	Translation, ribosomal structure and biogenesis	Cellular Component: cytoplasm (GO:0005737);; Molecular Function: rRNA binding (GO:0019843);; Cellular Component: ribonucleoprotein complex (GO:0030529);;	--	[J]	Translation, ribosomal structure and biogenesis	Ribosomal L18p/L5e family;; Ribosomal L18 C-terminal region	60S ribosomal protein L5 GN=RPL5 OS=Suberites domuncula (Sponge) PE=2 SV=1	predicted protein [Nematostella vectensis]
c18224.graph_c0	1.69786	0	2.18657e-05	4.29552	up	[GEPR]	--	--	--	[R]	General function prediction only	Sugar (and other) transporter;; Major Facilitator Superfamily	Organic cation transporter protein GN=Orct OS=Drosophila melanogaster (Fruit fly) PE=1 SV=1	AGAP004309-PA-like protein [Anopheles sinensis]
c18229.graph_c0	1.43594	0.0443166	0.000108896	3.60771	up	--	--	--	--	[L]	Replication, recombination and repair	Sas10/Utp3/C1D family	--	hypothetical protein CAPTEDRAFT_102365 [Capitella teleta]
c18232.graph_c0	10.0607	0.0947277	0	6.11382	up	--	--	--	--	[R]	General function prediction only	Galactose oxidase, central domain;; Galactose oxidase, central domain;; Kelch motif;; Kelch motif;; Kelch motif;; Kelch motif	Ras guanine nucleotide exchange factor F GN=gefF OS=Dictyostelium discoideum (Slime mold) PE=2 SV=1	predicted protein [Nematostella vectensis]
c18236.graph_c0	88.6805	1.26459	0	5.92164	up	--	--	--	--	--	--	Zona pellucida-like domain;; Trefoil (P-type) domain	ZP domain-containing protein {ECO:0000303|PubMed:23765379} (Precursor) OS=Acropora millepora (Staghorn coral) PE=1 SV=1	predicted protein [Nematostella vectensis]
c18312.graph_c0	0	3.48629	8.96838e-13	-5.47659	down	--	--	--	--	--	--	--	Uncharacterized proline-rich protein (Fragment) OS=Owenia fusiformis PE=4 SV=1	PREDICTED: leucine-rich repeat extensin-like protein 3 [Nasonia vitripennis]
c18313.graph_c0	2.20019	0	9.99201e-16	5.73681	up	--	--	--	--	[T]	Signal transduction mechanisms	Granulin	Prestalk protein (Precursor) GN=ecmB OS=Dictyostelium discoideum (Slime mold) PE=2 SV=2	PREDICTED: neurogenic locus notch homolog protein 1-like isoform X5 [Aplysia californica]
c18334.graph_c0	1.48858	0.0375882	4.19277e-06	3.88427	up	[O]	Posttranslational modification, protein turnover, chaperones	Molecular Function: threonine-type endopeptidase activity (GO:0004298);; Cellular Component: nucleus (GO:0005634);; Cellular Component: cytoplasm (GO:0005737);; Biological Process: ubiquitin-dependent protein catabolic process (GO:0006511);; Cellular Component: proteasome core complex, alpha-subunit complex (GO:0019773);;	K02727|1e-170|dre:564370|psma3, MGC114044, im:6909944, zgc:114044	[O]	Posttranslational modification, protein turnover, chaperones	Proteasome subunit;; Proteasome subunit A N-terminal signature	Proteasome subunit alpha type-3 (Fragment) OS=Acanthamoeba castellanii (Amoeba) PE=2 SV=1	PREDICTED: proteasome subunit alpha type-3-like [Saccoglossus kowalevskii]
c18370.graph_c0	1.64576	0.040335	2.4607e-06	3.92561	up	[F]	Nucleotide transport and metabolism	Molecular Function: IMP cyclohydrolase activity (GO:0003937);; Molecular Function: phosphoribosylaminoimidazolecarboxamide formyltransferase activity (GO:0004643);; Biological Process: purine nucleotide biosynthetic process (GO:0006164);;	K00602|1e-162|dre:140622|atic, cb72, id:ibd1333, wu:fb50b10, wu:fb58a11, wu:fi76g09, wu:fy77g01	[F]	Nucleotide transport and metabolism	AICARFT/IMPCHase bienzyme	IMP cyclohydrolase GN=purH OS=Dictyostelium discoideum (Slime mold) PE=1 SV=1	PREDICTED: bifunctional purine biosynthesis protein PURH [Tribolium castaneum]
c18370.graph_c1	2.573	0.0329852	6.27942e-13	4.83314	up	[F]	Nucleotide transport and metabolism	Molecular Function: IMP cyclohydrolase activity (GO:0003937);; Molecular Function: phosphoribosylaminoimidazolecarboxamide formyltransferase activity (GO:0004643);; Biological Process: purine nucleotide biosynthetic process (GO:0006164);; Biological Process: wound healing (GO:0042060);;	K00602|0.0|dre:140622|atic, cb72, id:ibd1333, wu:fb50b10, wu:fb58a11, wu:fi76g09, wu:fy77g01	[F]	Nucleotide transport and metabolism	AICARFT/IMPCHase bienzyme;; MGS-like domain	IMP cyclohydrolase GN=purH OS=Dictyostelium discoideum (Slime mold) PE=1 SV=1	Bifunctional purine biosynthesis protein PURH, partial [Stegodyphus mimosarum]
c18375.graph_c0	1.20291	4.57081	2.43892e-06	-2.03125	down	--	--	--	--	--	--	--	--	PREDICTED: P2X purinoceptor 7-like [Strongylocentrotus purpuratus]
c18417.graph_c0	12.3876	2.01702	3.55563e-07	2.35518	up
c18436.graph_c0	0	40.9395	0	-9.49625	down	[C]	Energy production and conversion	Molecular Function: catalytic activity (GO:0003824);; Biological Process: metabolic process (GO:0008152);;	--	--	--	Ribulose bisphosphate carboxylase, small chain;; Ribulose-1,5-bisphosphate carboxylase small subunit	--	ribulose bisphosphate carboxylase/oxygenase small subunit 1 [Gymnochlora stellata]
c18448.graph_c0	0	1.86284	3.4052e-07	-4.68799	down	--	--	--	--	[P]	Inorganic ion transport and metabolism	--	Probable plasma membrane ATPase GN=patB OS=Dictyostelium discoideum (Slime mold) PE=2 SV=2	P-type ATPase [Dictyostelium fasciculatum]
c18470.graph_c0	25.6734	0.298511	0	5.94548	up	--	--	--	--	[B]	Chromatin structure and dynamics	linker histone H1 and H5 family	Histone H1-beta, late embryonic OS=Strongylocentrotus purpuratus (Purple sea urchin) PE=3 SV=1	PREDICTED: sperm-specific protein PHI-2B/PHI-3-like [Saccoglossus kowalevskii]
c18495.graph_c0	1.39372	0	3.84426e-06	4.44544	up	[O]	Posttranslational modification, protein turnover, chaperones	Molecular Function: ATP binding (GO:0005524);; Cellular Component: lipid particle (GO:0005811);; Cellular Component: chaperonin-containing T-complex (GO:0005832);; Cellular Component: microtubule associated complex (GO:0005875);; Biological Process: protein folding (GO:0006457);; Biological Process: mitotic spindle organization (GO:0007052);; Biological Process: mitosis (GO:0007067);; Biological …	K09498|1e-115|ptr:463421|CCT6A	[O]	Posttranslational modification, protein turnover, chaperones	TCP-1/cpn60 chaperonin family	T-complex protein 1 subunit zeta GN=cct-6 OS=Caenorhabditis elegans PE=1 SV=1	PREDICTED: T-complex protein 1 subunit zeta-like [Strongylocentrotus purpuratus]
c18525.graph_c0	4.17801	0.139259	0.000329727	3.50233	up	--	--	--	K11295|5e-48|dre:641484|hmgb2, MGC123215, wu:fb22b10, wu:fc95d12, zgc:123215	[R]	General function prediction only	HMG-box domain;; HMG (high mobility group) box	High mobility group protein DSP1 GN=Dsp1 OS=Drosophila melanogaster (Fruit fly) PE=2 SV=1	High mobility group protein B2 [Caligus rogercresseyi]
c18545.graph_c0	11.1894	0.399597	6.06148e-12	4.08818	up	--	--	--	--	--	--	Cytochrome oxidase c subunit VIII	--	--
c18562.graph_c0	1.57404	0	3.93446e-05	4.24187	up	[O]	Posttranslational modification, protein turnover, chaperones	Molecular Function: ubiquitin-protein ligase activity (GO:0004842);; Biological Process: protein ubiquitination (GO:0016567);;	K10575|1e-106|dre:100000479|ube2g1b, MGC55321, MGC86866, ube2g1, wu:fc68b05, wu:fc75g08, wu:fk32c04, zgc:55321	[O]	Posttranslational modification, protein turnover, chaperones	Ubiquitin-conjugating enzyme	Probable ubiquitin-conjugating enzyme E2 7 GN=ubc-7 OS=Caenorhabditis elegans PE=1 SV=1	PREDICTED: ubiquitin-conjugating enzyme E2 G1-like isoform X2 [Diaphorina citri]
c18592.graph_c0	0	1.8129	6.99285e-09	-4.9604	down	[J]	Translation, ribosomal structure and biogenesis	Cellular Component: cytoplasm (GO:0005737);; Molecular Function: rRNA binding (GO:0019843);; Cellular Component: ribonucleoprotein complex (GO:0030529);;	--	[J]	Translation, ribosomal structure and biogenesis	Ribosomal L18p/L5e family;; Ribosomal L18 C-terminal region	60S ribosomal protein L5 GN=RPL5 OS=Suberites domuncula (Sponge) PE=2 SV=1	PREDICTED: 60S ribosomal protein L5 [Bactrocera dorsalis]
c18625.graph_c0	2.05508	0	1.35339e-10	5.14597	up	[CR]	--	--	--	[CR]	--	Alcohol dehydrogenase GroES-like domain;; Zinc-binding dehydrogenase	Quinone oxidoreductase-like protein 2 homolog GN=v1g238856 OS=Nematostella vectensis (Starlet sea anemone) PE=3 SV=1	PREDICTED: synaptic vesicle membrane protein VAT-1 homolog [Saccoglossus kowalevskii]
c18763.graph_c0	43.3596	0.331476	0	6.66745	up	--	--	--	--	--	--	Zona pellucida-like domain	--	--
c18794.graph_c0	1.56916	0.0318917	6.38809e-08	4.18596	up	[J]	Translation, ribosomal structure and biogenesis	Molecular Function: translation initiation factor activity (GO:0003743);; Cellular Component: nucleolus (GO:0005730);; Cellular Component: cytoplasm (GO:0005737);; Biological Process: translational initiation (GO:0006413);; Biological Process: mature ribosome assembly (GO:0042256);; Biological Process: ribosomal large subunit biogenesis (GO:0042273);; Molecular Function: ribosome binding (GO:0043…	K03264|1e-163|dre:386850|eif6, Itgb4bp, MGC56562, eIF-6, itgb4bp4, wu:fc28a04, wu:ft88f05, zgc:56562	[J]	Translation, ribosomal structure and biogenesis	eIF-6 family	Eukaryotic translation initiation factor 6 {ECO:0000255|HAMAP-Rule:MF_03132} OS=Drosophila melanogaster (Fruit fly) PE=2 SV=3	eukaryotic translation initiation factor 6 [Saccoglossus kowalevskii]
c18818.graph_c0	9.45052	0.199366	1.69864e-14	4.62265	up	[I]	Lipid transport and metabolism	Molecular Function: fatty-acyl-CoA binding (GO:0000062);;	K08762|2e-40|dre:393831|DBI, MGC77734, wu:fb63e10, zgc:56108	[I]	Lipid transport and metabolism	Acyl CoA binding protein	Putative acyl-CoA-binding protein OS=Hypsibius dujardini (Water bear) PE=3 SV=1	hypothetical protein BRAFLDRAFT_98944 [Branchiostoma floridae]
c18873.graph_c0	5.45055	0	1.78821e-09	4.992	up	--	--	--	--	--	--	Potato inhibitor I family	Chymotrypsin inhibitor (Precursor) OS=Lumbricus terrestris (Common earthworm) PE=1 SV=2	hypothetical protein [Paramecium tetraurelia strain d4-2]
c18975.graph_c0	1.42327	0	1.78821e-09	4.992	up	--	--	--	K10318|1e-31|dre:393403|MGC66488	--	--	--	--	--
c18978.graph_c0	13.9617	0.0782562	0	6.73584	up	[G]	Carbohydrate transport and metabolism	Molecular Function: glyceraldehyde-3-phosphate dehydrogenase (NAD+) (phosphorylating) activity (GO:0004365);; Cellular Component: cytoplasm (GO:0005737);; Biological Process: glycolysis (GO:0006096);; Biological Process: determination of adult lifespan (GO:0008340);; Biological Process: embryo development ending in birth or egg hatching (GO:0009792);; Cellular Component: microtubule cytoskeleton …	K00134|0.0|dre:317743|gapdh, cb609, gapd, mg:bb02e05, wu:fb33a10, wu:ft80f05	[G]	Carbohydrate transport and metabolism	Glyceraldehyde 3-phosphate dehydrogenase, C-terminal domain;; Glyceraldehyde 3-phosphate dehydrogenase, NAD binding domain	Glyceraldehyde-3-phosphate dehydrogenase 3.1 GN=gpd-3.1 OS=Caenorhabditis briggsae PE=3 SV=1	PREDICTED: glyceraldehyde-3-phosphate dehydrogenase-like [Ciona intestinalis]
c19013.graph_c0	2.06988	0	7.60475e-08	4.74445	up	[R]	General function prediction only	Molecular Function: nucleotide binding (GO:0000166);; Molecular Function: RNA binding (GO:0003723);;	--	[AJ]	--	Poly-adenylate binding protein, unique domain	Polyadenylate-binding protein GN=pAbp OS=Drosophila melanogaster (Fruit fly) PE=1 SV=3	Polyadenylate-binding protein, putative [Pediculus humanus corporis]
c19039.graph_c0	45.5095	0.438691	0	6.31303	up	--	--	--	K06087|1e-115|dre:81583|cldnd, ns:zf-a310, zf-a310, zgc:101004	--	--	PMP-22/EMP/MP20/Claudin family;; PMP-22/EMP/MP20/Claudin tight junction	--	PREDICTED: claudin-7-like [Ciona intestinalis]
c19075.graph_c0	6.46458	0.916908	9.78681e-05	2.44809	up
c19097.graph_c0	0	1.95331	1.26625e-07	-4.76106	down	--	--	Molecular Function: phosphatase activity (GO:0016791);;	K03841|2e-33|cin:100184976|similar to Fructose-1,6-bisphosphatase	[G]	Carbohydrate transport and metabolism	Fructose-1-6-bisphosphatase	Fructose-1,6-bisphosphatase GN=fbp OS=Dictyostelium discoideum (Slime mold) PE=3 SV=1	chloroplast sedoheptulose-1,7-bisphosphatase [Gymnochlora stellata]
c19108.graph_c0	20.6351	0.215707	0	6.13961	up	--	--	--	--	--	--	Zona pellucida-like domain	--	--
c19219.graph_c0	1.06174	0	1.23016e-06	4.53737	up	--	--	--	--	[P]	Inorganic ion transport and metabolism	Sodium / potassium ATPase beta chain	Sodium/potassium-transporting ATPase subunit beta OS=Artemia franciscana (Brine shrimp) PE=2 SV=1	PREDICTED: sodium/potassium-transporting ATPase subunit beta-like [Aplysia californica]
c19239.graph_c0	1.45388	0.0403833	2.1098e-05	3.7526	up	[TZDR]	--	Cellular Component: spindle pole (GO:0000922);; Molecular Function: calmodulin-dependent protein kinase activity (GO:0004683);; Molecular Function: calcium ion binding (GO:0005509);; Biological Process: detection of calcium ion (GO:0005513);; Molecular Function: calmodulin binding (GO:0005516);; Molecular Function: ATP binding (GO:0005524);; Cellular Component: centriole (GO:0005814);; Cellular C…	K02183|1e-101|mdo:100018191|hypothetical protein LOC100018191	[T]	Signal transduction mechanisms	EF hand;; EF-hand domain pair;; EF-hand domain pair;; EF-hand domain;; EF hand;; EF-hand domain;; Cytoskeletal-regulatory complex EF hand;; Secreted protein acidic and rich in cysteine Ca binding region;; Ca2+ insensitive EF hand;; Uncharacterised protein family (UPF0154)	Calmodulin OS=Stichopus japonicus (Sea cucumber) PE=1 SV=2	Protein CMD-1 [Caenorhabditis elegans]
c19248.graph_c0	1.56487	0	3.76497e-10	5.08634	up	--	--	--	K11282|0.0|dre:337155|nap1l4a, cb910, nap1l4, wu:fa99c07	[BD]	--	Nucleosome assembly protein (NAP)	Probable nucleosome assembly protein GN=nap1 OS=Dictyostelium discoideum (Slime mold) PE=2 SV=1	PREDICTED: nucleosome assembly protein 1-like 1-like isoform X3 [Saccoglossus kowalevskii]
c19251.graph_c0	1.85691	0	2.18657e-05	4.29552	up	--	--	--	K14361|7e-20|dre:569661|hypothetical LOC569661	--	--	Ricin-type beta-trefoil lectin domain	--	--
c19268.graph_c0	10.2683	0.921456	2.61534e-08	3.06489	up
c19325.graph_c0	8.76177	0.0869173	0	5.69786	up	[J]	Translation, ribosomal structure and biogenesis	Molecular Function: structural constituent of ribosome (GO:0003735);; Cellular Component: ribosome (GO:0005840);; Biological Process: translation (GO:0006412);;	K02991|1e-169|ecb:100052368|similar to ribosomal protein S6	[J]	Translation, ribosomal structure and biogenesis	Ribosomal protein S6e	40S ribosomal protein S6 GN=RPS6 OS=Aplysia californica (California sea hare) PE=2 SV=1	predicted protein [Nematostella vectensis]
c19366.graph_c0	7.37905	0	0	6.6007	up	--	--	--	--	[S]	Function unknown	U11-48K-like CHHC zinc finger	--	hypothetical protein BRAFLDRAFT_199714 [Branchiostoma floridae]
c19378.graph_c0	6.74644	0.0537963	0	6.01057	up	--	--	--	--	--	--	Zona pellucida-like domain	ZP domain-containing protein {ECO:0000303|PubMed:23765379} (Precursor) OS=Acropora millepora (Staghorn coral) PE=1 SV=1	unnamed protein product [Oikopleura dioica]
c19385.graph_c0	17.4538	68.0661	1.06581e-14	-2.1221	down
c19406.graph_c0	4.24906	0.079865	0	5.00077	up	--	--	--	--	--	--	Thyroglobulin type-1 repeat	--	Tumor-associated calcium signal transducer 2 precursor [Caligus rogercresseyi]
c19512.graph_c0	7.62179	0.0567064	0	5.60535	up	--	--	--	--	--	--	Death-associated protein	--	PREDICTED: death-associated protein 1-like [Saccoglossus kowalevskii]
c19530.graph_c0	6.48224	0.0915518	9.80371e-12	4.6965	up	[J]	Translation, ribosomal structure and biogenesis	Molecular Function: structural constituent of ribosome (GO:0003735);; Cellular Component: ribosome (GO:0005840);; Biological Process: translation (GO:0006412);;	K02917|3e-71|dre:436760|rpl35a, zgc:92859	[J]	Translation, ribosomal structure and biogenesis	Ribosomal protein L35Ae	60S ribosomal protein L35a GN=rpl-33 OS=Caenorhabditis elegans PE=1 SV=3	hypothetical protein BRAFLDRAFT_277091 [Branchiostoma floridae]
c19541.graph_c0	4.06587	0.0205335	0	6.15861	up	[G]	Carbohydrate transport and metabolism	Cellular Component: phosphopyruvate hydratase complex (GO:0000015);; Molecular Function: magnesium ion binding (GO:0000287);; Molecular Function: phosphopyruvate hydratase activity (GO:0004634);; Biological Process: glycolysis (GO:0006096);;	K01689|0.0|dre:334116|eno1, wu:fi32b03, wu:fk58e02, zgc:73152	[G]	Carbohydrate transport and metabolism	Enolase, C-terminal TIM barrel domain;; Enolase, N-terminal domain	Enolase OS=Doryteuthis pealeii (Longfin inshore squid) PE=2 SV=1	hypothetical protein BRAFLDRAFT_113733 [Branchiostoma floridae]
c19560.graph_c0	6.37902	0.0526291	0	5.45814	up	[J]	Translation, ribosomal structure and biogenesis	Molecular Function: structural constituent of ribosome (GO:0003735);; Cellular Component: ribosome (GO:0005840);; Biological Process: translation (GO:0006412);;	K02995|1e-147|xtr:549320|rps8	[J]	Translation, ribosomal structure and biogenesis	Ribosomal protein S8e	40S ribosomal protein S8 GN=RpS8 OS=Apis mellifera (Honeybee) PE=2 SV=2	PREDICTED: 40S ribosomal protein S8-like [Saccoglossus kowalevskii]
c19572.graph_c0	0.508823	26.6208	0	-5.73955	down	--	--	Molecular Function: iron ion binding (GO:0005506);; Cellular Component: photosystem II (GO:0009523);; Cellular Component: chloroplast thylakoid membrane (GO:0009535);; Biological Process: response to herbicide (GO:0009635);; Biological Process: photosynthetic electron transport in photosystem II (GO:0009772);; Cellular Component: integral component of membrane (GO:0016021);; Molecular Function: o…	--	--	--	Photosynthetic reaction centre protein	Photosystem II D2 protein {ECO:0000255|HAMAP-Rule:MF_01383} GN=PCC_0299 OS=Paulinella chromatophora PE=3 SV=1	photosystem II D1 protein [Lotharella sp. CCMP622]
c19577.graph_c0	4.79851	0	2.25375e-14	5.59424	up	[J]	Translation, ribosomal structure and biogenesis	Molecular Function: structural constituent of ribosome (GO:0003735);; Biological Process: translation (GO:0006412);; Cellular Component: large ribosomal subunit (GO:0015934);;	K02880|1e-131|dre:336641|RPL17, fa91a06, wu:fa91a06, wu:fa99c06	[J]	Translation, ribosomal structure and biogenesis	Ribosomal protein L22p/L17e	60S ribosomal protein L17 GN=RPL17 OS=Podocoryne carnea PE=2 SV=1	PREDICTED: 60S ribosomal protein L17-like [Ciona intestinalis]
c19583.graph_c0	19.9784	0.208096	8.88178e-16	5.12701	up
c19592.graph_c0	19.4388	2.89088	1.11022e-16	2.55636	up	--	--	--	--	[WV]	--	von Willebrand factor type D domain	--	PREDICTED: kielin/chordin-like protein-like [Strongylocentrotus purpuratus]
c19659.graph_c0	4.86472	0.0900822	8.43029e-09	4.31604	up
c19661.graph_c0	6.58604	0.0831522	0	5.56992	up	[R]	General function prediction only	Molecular Function: metal ion binding (GO:0046872);;	K13056|1e-110|dre:30114|cth1, MGC123163, cb266, fa18c01, wu:fa18c01, zfcth1	[R]	General function prediction only	Zinc finger C-x8-C-x5-C-x3-H type (and similar)	Protein TIS11 GN=Tis11 OS=Drosophila melanogaster (Fruit fly) PE=2 SV=2	hypothetical protein DAPPUDRAFT_9312 [Daphnia pulex]
c19667.graph_c0	5.38534	0.0107615	0	7.48886	up	--	--	--	--	--	--	Zona pellucida-like domain;; Fibronectin type III domain;; Calcium-binding EGF domain	ZP domain-containing protein {ECO:0000303|PubMed:23765379} (Precursor) OS=Acropora millepora (Staghorn coral) PE=1 SV=1	predicted protein [Nematostella vectensis]
c19676.graph_c0	1.59476	9.50668	1.11866e-12	-2.67663	down
c19718.graph_c0	0.494728	136.518	0	-8.12657	down	--	--	--	--	--	--	--	AAC-rich mRNA clone AAC4 protein GN=AAC4 OS=Dictyostelium discoideum (Slime mold) PE=2 SV=3	PREDICTED: AAC-rich mRNA clone AAC4 protein-like [Strongylocentrotus purpuratus]
c19727.graph_c0	1.50235	0.201917	0.00369557	2.41696	up	--	--	--	--	[T]	Signal transduction mechanisms	Sodium:neurotransmitter symporter family	Sodium-dependent serotonin transporter GN=SerT OS=Drosophila melanogaster (Fruit fly) PE=2 SV=1	PREDICTED: sodium- and chloride-dependent GABA transporter 2-like [Strongylocentrotus purpuratus]
c19730.graph_c0	31.7863	244.153	0	-3.09743	down	--	--	--	--	--	--	--	--	hypothetical protein X975_24482, partial [Stegodyphus mimosarum]
c19739.graph_c0	34.7761	0.262248	0	6.09059	up
c19760.graph_c0	15.5443	0.152386	0	6.13531	up	--	--	--	--	--	--	Zinc-binding domain	--	hypothetical protein BRAFLDRAFT_118679 [Branchiostoma floridae]
c19762.graph_c0	0	4.03695	0	-6.90117	down	[P]	Inorganic ion transport and metabolism	Molecular Function: catalase activity (GO:0004096);; Cellular Component: peroxisome (GO:0005777);; Biological Process: response to oxidative stress (GO:0006979);; Biological Process: peroxisome organization (GO:0007031);; Biological Process: axon guidance (GO:0007411);; Biological Process: determination of adult lifespan (GO:0008340);;	K03781|1e-135|cbr:CBG20807|Hypothetical protein CBG20807	[P]	Inorganic ion transport and metabolism	Catalase;; Catalase-related immune-responsive	Peroxisomal catalase 1 GN=ctl-2 OS=Caenorhabditis elegans PE=2 SV=3	catalase isozyme 2 [Capsaspora owczarzaki ATCC 30864]
c19791.graph_c1	6.56005	0.198778	6.03603e-10	4.11111	up
c19848.graph_c0	23.997	0.315898	0	5.88473	up	[O]	Posttranslational modification, protein turnover, chaperones	Molecular Function: ATP binding (GO:0005524);; Biological Process: response to stress (GO:0006950);;	K03283|0.0|dre:573376|hspa8, MGC55272, hsc70, wu:fb01g06, wu:fi48b06	[O]	Posttranslational modification, protein turnover, chaperones	Hsp70 protein;; MreB/Mbl protein;; NAD-specific glutamate dehydrogenase;; NAD-specific glutamate dehydrogenase	Heat shock 70 kDa protein cognate 4 OS=Manduca sexta (Tobacco hawkmoth) PE=2 SV=1	heat shock protein 70 [Marsupenaeus japonicus]
c19851.graph_c0	4.32839	0.144271	6.24851e-09	3.97717	up	--	--	--	K10435|2e-69|dre:393268|KM0005, MGC56565	[Z]	Cytoskeleton	Autophagy protein Atg8 ubiquitin like	Protein lgg-2 GN=lgg-2 OS=Caenorhabditis elegans PE=1 SV=1	PREDICTED: microtubule-associated proteins 1A/1B light chain 3C-like [Hydra vulgaris]
c19908.graph_c0	5.19017	0.0485943	0	5.78061	up	--	--	--	K10091|3e-89|aml:100467012|galectin-4-like	[W]	Extracellular structures	Galactoside-binding lectin	32 kDa beta-galactoside-binding lectin GN=lec-1 OS=Caenorhabditis elegans PE=1 SV=1	hypothetical protein BRAFLDRAFT_126856 [Branchiostoma floridae]
c19922.graph_c0	5.94263	0	2.98355e-11	5.23103	up
c19969.graph_c0	17.3005	0.211034	0	6.06541	up	[O]	Posttranslational modification, protein turnover, chaperones	Molecular Function: ATP binding (GO:0005524);; Biological Process: protein folding (GO:0006457);; Biological Process: response to stress (GO:0006950);; Molecular Function: unfolded protein binding (GO:0051082);;	K04079|0.0|dre:30573|hsp90ab1, hsp90b, hsp90beta, wu:fa29f01, wu:fa91e11, wu:fd59e11, wu:gcd22h07	[O]	Posttranslational modification, protein turnover, chaperones	Hsp90 protein;; Histidine kinase-, DNA gyrase B-, and HSP90-like ATPase;; Histidine kinase-, DNA gyrase B-, and HSP90-like ATPase	Heat shock protein 83 GN=Hsp83 OS=Bombyx mori (Silk moth) PE=1 SV=1	84kDa heat shock protein [Haliotis tuberculata]
c19997.graph_c0	3.86598	0.0270711	0	5.69177	up	--	--	--	--	[S]	Function unknown	--	--	PREDICTED: LOW QUALITY PROTEIN: redox-regulatory protein FAM213A-like [Aplysia californica]
c20118.graph_c0	5.4824	0	0	6.2117	up	[O]	Posttranslational modification, protein turnover, chaperones	Molecular Function: translation elongation factor activity (GO:0003746);; Cellular Component: eukaryotic translation elongation factor 1 complex (GO:0005853);; Biological Process: translational elongation (GO:0006414);;	K03233|1e-160|dre:195822|eef1g, db03h10, fk76a09, mg:db03h10, wu:fk76a09	[O]	Posttranslational modification, protein turnover, chaperones	Glutathione S-transferase, C-terminal domain;; Glutathione S-transferase, N-terminal domain;; Glutathione S-transferase, C-terminal domain;; Glutathione S-transferase, C-terminal domain;; Glutathione S-transferase, N-terminal domain	Elongation factor 1-gamma OS=Artemia salina (Brine shrimp) PE=1 SV=3	hypothetical protein BRAFLDRAFT_115434 [Branchiostoma floridae]
c20147.graph_c0	0.0961186	5.28622	0	-5.19896	down	--	--	--	--	--	--	Chlorophyll A-B binding protein	--	light harvesting complex protein LHCII-3 [Gymnochlora stellata]
c20153.graph_c0	0	7.1204	6.99285e-09	-4.9604	down	--	--	Cellular Component: chloroplast (GO:0009507);; Biological Process: photosynthesis, light harvesting (GO:0009765);; Cellular Component: membrane (GO:0016020);;	--	--	--	--	--	light-harvesting complex protein LHCG11 [Bigelowiella natans]
c20193.graph_c0	5.63146	0.10428	2.22045e-16	4.80766	up	--	--	--	--	[DZ]	--	Translationally controlled tumour protein	Translationally-controlled tumor protein homolog OS=Branchiostoma belcheri (Amphioxus) PE=2 SV=1	translationally controlled tumor protein [Branchiostoma japonicum]
c20220.graph_c0	0.0674834	2.69918	2.24301e-08	-4.27088	down	--	--	--	--	--	--	--	Uncharacterized protein PF11_0207 GN=PF11_0207 OS=Plasmodium falciparum (isolate 3D7) PE=4 SV=2	--
c20226.graph_c0	0	4.57964	9.54792e-15	-5.69745	down
c20270.graph_c0	3.96625	0.0183612	0	6.28313	up	[G]	Carbohydrate transport and metabolism	Molecular Function: glucose-6-phosphate isomerase activity (GO:0004347);; Cellular Component: cytoplasm (GO:0005737);; Biological Process: gluconeogenesis (GO:0006094);; Biological Process: glycolysis (GO:0006096);;	K01810|0.0|dre:246095|gpib, PGI, gpi, pgi-2	[G]	Carbohydrate transport and metabolism	Phosphoglucose isomerase	Glucose-6-phosphate isomerase GN=Pgi OS=Drosophila simulans (Fruit fly) PE=3 SV=1	glucose-6-phosphate isomerase [Danaus plexippus]
c20356.graph_c0	7.60553	0.166778	5.90639e-14	4.56778	up	[J]	Translation, ribosomal structure and biogenesis	Molecular Function: structural constituent of ribosome (GO:0003735);; Cellular Component: ribosome (GO:0005840);; Biological Process: translation (GO:0006412);;	K02966|7e-93|dre:393723|rps19, MGC73211, zgc:73211	[J]	Translation, ribosomal structure and biogenesis	Ribosomal protein S19e	40S ribosomal protein S19 GN=RPS19 OS=Branchiostoma belcheri (Amphioxus) PE=2 SV=1	PREDICTED: 40S ribosomal protein S19-like isoform X1 [Saccoglossus kowalevskii]
c20376.graph_c0	1.8748	9.18966	2.19583e-07	-2.36577	down
c20429.graph_c0	3.87586	0.0461385	6.77236e-14	4.93789	up	[R]	General function prediction only	Biological Process: nematode larval development (GO:0002119);; Molecular Function: GTPase activity (GO:0003924);; Molecular Function: protein binding (GO:0005515);; Molecular Function: GTP binding (GO:0005525);; Biological Process: GTP catabolic process (GO:0006184);; Biological Process: intracellular protein transport (GO:0006886);; Biological Process: nucleocytoplasmic transport (GO:0006913);; …	K07936|1e-146|dre:30572|ran, fc16b04, wu:fc16b04	[U]	Intracellular trafficking, secretion, and vesicular transport	Ras family;; Miro-like protein;; ADP-ribosylation factor family;; RNA helicase;; Gtr1/RagA G protein conserved region	GTP-binding nuclear protein ran-1 GN=ran-1 OS=Caenorhabditis elegans PE=1 SV=1	PREDICTED: GTP-binding nuclear protein Ran-like [Amphimedon queenslandica]
c20439.graph_c0	3.98334	0	2.25386e-10	5.11646	up	[J]	Translation, ribosomal structure and biogenesis	Cellular Component: ribosome (GO:0005840);;	K02947|1e-116|dre:394121|rps10, MGC65936, zgc:65936, zgc:85848	[J]	Translation, ribosomal structure and biogenesis	Plectin/S10 domain	40S ribosomal protein S10 GN=RPS10 OS=Lumbricus rubellus (Humus earthworm) PE=2 SV=1	putative ribosomal protein S10 [Sipunculus nudus]
c20453.graph_c0	7.02903	0.0732148	0	5.62807	up	--	--	Molecular Function: hydrolase activity (GO:0016787);;	--	[O]	Posttranslational modification, protein turnover, chaperones	Astacin (Peptidase family M12A)	Zinc metalloproteinase nas-14 (Precursor) GN=nas-14 OS=Caenorhabditis elegans PE=2 SV=2	hypothetical protein BRAFLDRAFT_245310 [Branchiostoma floridae]
c20504.graph_c0	5.78709	0	0	5.84871	up	--	--	--	--	[R]	General function prediction only	Tetraspanin family	23 kDa integral membrane protein OS=Schistosoma mansoni (Blood fluke) PE=2 SV=1	Tetraspanin-8 [Caligus rogercresseyi]
c20508.graph_c0	8.94718	0.189548	0	4.83003	up	[J]	Translation, ribosomal structure and biogenesis	Molecular Function: translation initiation factor activity (GO:0003743);; Molecular Function: translation elongation factor activity (GO:0003746);; Biological Process: translational initiation (GO:0006413);; Biological Process: translational frameshifting (GO:0006452);; Biological Process: peptidyl-lysine modification to hypusine (GO:0008612);; Molecular Function: ribosome binding (GO:0043022);; …	K03263|4e-22|dre:406546|eif5a2, EIF5A, wu:fb05b06, wu:fc23f04, wu:fc61c10, zgc:55504, zgc:77429	[J]	Translation, ribosomal structure and biogenesis	Eukaryotic elongation factor 5A hypusine, DNA-binding OB fold	Eukaryotic translation initiation factor 5A GN=eIF-5A OS=Spodoptera frugiperda (Fall armyworm) PE=2 SV=1	Eukaryotic translation initiation factor 5A-1 [Caligus rogercresseyi]
c20511.graph_c0	8.55258	0	0	7.2772	up	--	--	--	K10749|5e-66|dre:368320|gmnn, sb:cb254, zgc:66217	--	--	Geminin	--	hypothetical protein CGI_10004536 [Crassostrea gigas]
c20539.graph_c0	8.12244	0.153825	4.44089e-16	4.77574	up	[J]	Translation, ribosomal structure and biogenesis	Molecular Function: RNA binding (GO:0003723);; Molecular Function: structural constituent of ribosome (GO:0003735);; Biological Process: translation (GO:0006412);; Cellular Component: small ribosomal subunit (GO:0015935);;	K02969|5e-79|tgu:100227916|similar to MGC82136 protein	[J]	Translation, ribosomal structure and biogenesis	Ribosomal protein S10p/S20e	40S ribosomal protein S20 GN=RpS20 OS=Drosophila melanogaster (Fruit fly) PE=1 SV=1	40S ribosomal protein S20 [Caligus clemensi]
c20540.graph_c0	0	16.7332	0	-6.16955	down
c20566.graph_c0	8.85985	0.198767	0	5.04198	up	--	--	--	--	--	--	Thyroid hormone-inducible hepatic protein Spot 14	--	PREDICTED: mid1-interacting protein 1A-like [Aplysia californica]
c20584.graph_c0	63.331	0.443096	0	6.89121	up	--	--	--	--	--	--	Zona pellucida-like domain	ZP domain-containing protein {ECO:0000303|PubMed:23765379} (Precursor) OS=Acropora millepora (Staghorn coral) PE=1 SV=1	predicted protein [Nematostella vectensis]
c20617.graph_c0	3.51998	0.0838042	1.44827e-06	3.96581	up	[J]	Translation, ribosomal structure and biogenesis	Molecular Function: structural constituent of ribosome (GO:0003735);; Cellular Component: ribosome (GO:0005840);; Biological Process: translation (GO:0006412);;	K02953|8e-98|dre:415169|rps13, fb14f11, fd13f08, fd60g01, wu:fb14f11, wu:fd13f08, wu:fd60g01, zgc:91809	[J]	Translation, ribosomal structure and biogenesis	Ribosomal S13/S15 N-terminal domain;; Ribosomal protein S15	40S ribosomal protein S13 GN=RpS13 OS=Spodoptera frugiperda (Fall armyworm) PE=2 SV=3	PREDICTED: 40S ribosomal protein S13-like [Saccoglossus kowalevskii]
c20627.graph_c0	0	4.86561	0	-6.43818	down	--	--	Cellular Component: chloroplast (GO:0009507);; Biological Process: photosynthesis, light harvesting (GO:0009765);; Cellular Component: membrane (GO:0016020);;	--	--	--	Chlorophyll A-B binding protein	--	light-harvesting complex protein LHCG11 [Bigelowiella natans]
c20648.graph_c0	5.63199	0	0	7.20894	up	[D]	Cell cycle control, cell division, chromosome partitioning	Biological Process: cell cycle (GO:0007049);;	--	[D]	Cell cycle control, cell division, chromosome partitioning	Cyclin, N-terminal domain;; Cyclin, C-terminal domain	G2/mitotic-specific cyclin-B OS=Spisula solidissima (Atlantic surf-clam) PE=2 SV=1	cyclin B [Tachypleus tridentatus]
c20661.graph_c0	35.3451	0.33612	0	6.42419	up	[U]	Intracellular trafficking, secretion, and vesicular transport	Biological Process: transport (GO:0006810);;	--	[U]	Intracellular trafficking, secretion, and vesicular transport	Armadillo/beta-catenin-like repeat;; HEAT repeats;; Importin beta binding domain;; HEAT-like repeat;; HEAT repeat	Importin subunit alpha GN=Pen OS=Drosophila melanogaster (Fruit fly) PE=1 SV=2	hypothetical protein CAPTEDRAFT_169892 [Capitella teleta]
c20674.graph_c0	6.35289	0.0833664	0	5.29806	up	[J]	Translation, ribosomal structure and biogenesis	Cellular Component: ribosome (GO:0005840);; Biological Process: ribosome biogenesis (GO:0042254);;	K02936|1e-151|xtr:447981|rpl7a, MGC149045, surf3, trup	[J]	Translation, ribosomal structure and biogenesis	Ribosomal protein L7Ae/L30e/S12e/Gadd45 family	60S ribosomal protein L7a GN=RpL7A OS=Drosophila melanogaster (Fruit fly) PE=1 SV=2	hypothetical protein BRAFLDRAFT_118946 [Branchiostoma floridae]
c20695.graph_c0	0.0622824	1.86836	5.9032e-06	-3.87028	down	--	--	Cellular Component: nucleus (GO:0005634);; Cellular Component: cytoplasm (GO:0005737);;	K08770|1e-116|cin:100175058|similar to ubiquitin	[OR]	--	Ubiquitin family;; Ubiquitin-2 like Rad60 SUMO-like;; Ubiquitin-like domain;; Telomere stability and silencing;; Ubiquitin-2 like Rad60 SUMO-like;; DUF2407 ubiquitin-like domain;; RNA methyltransferase	Ubiquitin (Precursor) OS=Euplotes eurystomus (Ciliate) PE=3 SV=2	RecName: Full=Polyubiquitin; Contains: RecName: Full=Ubiquitin; Flags: Precursor [Euplotes eurystomus]
c20726.graph_c0	3.93954	0.383699	3.54012e-09	2.99951	up
c20739.graph_c0	9.10281	1.68561	0.00730186	2.07608	up
c2077.graph_c0	0.952874	0	2.29034e-07	4.66515	up	--	--	--	--	[A]	RNA processing and modification	GLE1-like protein	Nucleoporin GLE1 GN=GLE1 OS=Drosophila melanogaster (Fruit fly) PE=2 SV=1	hypothetical protein BRAFLDRAFT_64464 [Branchiostoma floridae]
c20916.graph_c0	1.62763	0.135628	0.000551615	2.9029	up	--	--	--	--	[A]	RNA processing and modification	Small nuclear RNA activating complex (SNAPc), subunit SNAP43	--	snRNA-activating protein complex subunit 1 [Crassostrea gigas]
c21296.graph_c0	1.4596	0.140338	0.00396103	2.70628	up	[E]	Amino acid transport and metabolism	Biological Process: cellular amino acid metabolic process (GO:0006520);; Molecular Function: oxidoreductase activity, acting on the CH-NH2 group of donors, NAD or NADP as acceptor (GO:0016639);; Biological Process: oxidation-reduction process (GO:0055114);;	K00261|1e-162|dre:373092|glud1b, MGC192851, cb719, glud1, wu:fb16e02, wu:fb58f12, wu:fe37f03, wu:fj43f02, zgc:192851, zgc:55630	[E]	Amino acid transport and metabolism	Glutamate/Leucine/Phenylalanine/Valine dehydrogenase	Glutamate dehydrogenase, mitochondrial (Precursor) GN=Gdh OS=Drosophila melanogaster (Fruit fly) PE=1 SV=2	hypothetical protein BRAFLDRAFT_130686 [Branchiostoma floridae]
c21871.graph_c0	1.90434	0	1.23016e-06	4.53737	up
c22020.graph_c0	1.33613	0	6.83519e-06	4.39717	up	--	--	Biological Process: regulation of cellular process (GO:0050794);;	--	[T]	Signal transduction mechanisms	BTK motif	--	hypothetical protein BRAFLDRAFT_78431 [Branchiostoma floridae]
c22131.graph_c1	4.84506	0.180775	2.15936e-11	4.02625	up	[J]	Translation, ribosomal structure and biogenesis	Molecular Function: structural constituent of ribosome (GO:0003735);; Cellular Component: ribosome (GO:0005840);; Biological Process: translation (GO:0006412);; Molecular Function: rRNA binding (GO:0019843);;	K02987|1e-145|dre:449547|rps4x, wu:fa91h09, zgc:92076	[J]	Translation, ribosomal structure and biogenesis	Ribosomal family S4e;; RS4NT (NUC023) domain;; S4 domain	40S ribosomal protein S4 GN=RpS4 OS=Ixodes scapularis (Black-legged tick) PE=2 SV=1	PREDICTED: 40S ribosomal protein S4, X isoform-like [Saccoglossus kowalevskii]
c22247.graph_c0	1.87622	0.0446694	1.44827e-06	3.96581	up	[R]	General function prediction only	Molecular Function: signal transducer activity (GO:0004871);; Biological Process: signal transduction (GO:0007165);; Molecular Function: hydrolase activity (GO:0016787);; Molecular Function: metal ion binding (GO:0046872);;	K07048|0.0|dre:751664|pter, MGC153666, zgc:153666	--	--	Phosphotriesterase family;; TatD related DNase	Phosphotriesterase-related protein GN=v1g177083 OS=Nematostella vectensis (Starlet sea anemone) PE=3 SV=1	PREDICTED: phosphotriesterase-related protein-like [Aplysia californica]
c22389.graph_c1	0.962276	0.096222	0.00648258	2.65263	up	[C]	Energy production and conversion	Molecular Function: ATP binding (GO:0005524);; Cellular Component: chloroplast thylakoid membrane (GO:0009535);; Biological Process: ATP hydrolysis coupled proton transport (GO:0015991);; Biological Process: plasma membrane ATP synthesis coupled proton transport (GO:0042777);; Cellular Component: proton-transporting ATP synthase complex, catalytic core F(1) (GO:0045261);; Molecular Function: prot…	--	[C]	Energy production and conversion	ATP synthase alpha/beta chain, C terminal domain;; ATP synthase alpha/beta family, nucleotide-binding domain;; ATP synthase, Delta/Epsilon chain, beta-sandwich domain;; ATP synthase, Delta/Epsilon chain, long alpha-helix domain	ATP synthase subunit beta, mitochondrial (Precursor) GN=ATPsyn-beta OS=Drosophila melanogaster (Fruit fly) PE=1 SV=3	hypothetical protein BRAFLDRAFT_125760 [Branchiostoma floridae]
c22449.graph_c0	1.17545	0	2.29034e-07	4.66515	up	--	--	--	--	[KT]	--	Ubinuclein conserved middle domain;; HPC2 and ubinuclein domain	Yemanuclein-alpha GN=yemalpha OS=Drosophila melanogaster (Fruit fly) PE=1 SV=1	Ubinuclein-1 [Crassostrea gigas]
c22531.graph_c0	1.9598	0	2.25375e-14	5.59424	up	--	--	Molecular Function: sequence-specific DNA binding transcription factor activity (GO:0003700);; Cellular Component: nucleus (GO:0005634);; Biological Process: regulation of transcription, DNA-templated (GO:0006355);; Molecular Function: sequence-specific DNA binding (GO:0043565);;	K09369|0.0|dre:30333|pou5f1, POU-2, cb197, chunp6868, gp-9, gp9, oct4, pou2, spg/pou2, wu:fd18d06	[K]	Transcription	Pou domain - N-terminal to homeobox domain;; Homeobox domain	POU domain protein CF1A GN=vvl OS=Drosophila melanogaster (Fruit fly) PE=2 SV=5	hypothetical protein CAPTEDRAFT_44575, partial [Capitella teleta]
c22645.graph_c0	2.08603	0.0362137	1.89901e-09	4.40643	up	--	--	--	--	[W]	Extracellular structures	--	--	PREDICTED: uncharacterized protein LOC100889163 [Strongylocentrotus purpuratus]
c22655.graph_c0	2.21947	0.0276038	2.55906e-13	4.87596	up	--	--	--	K12382|1e-115|dre:140811|psap, cb759, wu:fa14a06, wu:fb36e02, wu:fb58g07	[IG]	--	Saposin-like type B, region 1;; Saposin-like type B, region 2;; Saposin A-type domain;; TLR4 regulator and MIR-interacting MSAP	--	PREDICTED: prosaposin-like [Saccoglossus kowalevskii]
c22725.graph_c0	2.15671	0.035943	7.12405e-10	4.4637	up	--	--	--	K12382|1e-136|dre:140811|psap, cb759, wu:fa14a06, wu:fb36e02, wu:fb58g07	[IG]	--	Saposin-like type B, region 2;; Saposin A-type domain;; Saposin-like type B, region 1	--	PREDICTED: prosaposin-like [Saccoglossus kowalevskii]
c22761.graph_c0	0	2.86476	8.88178e-16	-5.80504	down	--	--	--	--	--	--	Chlorophyll A-B binding protein	--	chlorophyll a/b-binding protein CP29 [Bigelowiella natans]
c22794.graph_c0	1.94698	0.0207999	2.10942e-15	5.09112	up	[MJ]	--	Cellular Component: cytoplasm (GO:0005737);; Biological Process: long-term memory (GO:0007616);; Biological Process: axon midline choice point recognition (GO:0016199);; Biological Process: negative regulation of translation (GO:0017148);; Cellular Component: filopodium (GO:0030175);; Molecular Function: translation initiation factor binding (GO:0031369);; Molecular Function: ribosome binding (GO…	--	[J]	Translation, ribosomal structure and biogenesis	eIF4-gamma/eIF5/eIF2-epsilon	Protein krasavietz GN=kra OS=Drosophila melanogaster (Fruit fly) PE=1 SV=1	hypothetical protein BRAFLDRAFT_120788 [Branchiostoma floridae]
c23125.graph_c0	2.30279	0	1.22009e-05	4.34724	up	--	--	--	--	[QR]	--	non-haem dioxygenase in morphine synthesis N-terminal	--	hypothetical protein BRAFLDRAFT_121863 [Branchiostoma floridae]
c23189.graph_c0	1.6108	0.039478	1.78679e-12	4.41037	up	--	--	--	--	--	--	--	Calcium-binding protein P GN=cbpP OS=Dictyostelium discoideum (Slime mold) PE=2 SV=2	PREDICTED: protein transport protein Sec24C [Bactrocera cucurbitae]
c23256.graph_c0	2.09253	0.0260249	2.55906e-13	4.87596	up	--	--	Molecular Function: binding (GO:0005488);;	K09375|1e-139|dre:378959|lhx8a, cb875, fk78g12, lhx7, lhx8, wu:fk78g12	[R]	General function prediction only	LIM domain;; Homeobox domain;; Homeobox KN domain	LIM/homeobox protein Awh OS=Drosophila melanogaster (Fruit fly) PE=1 SV=1	PREDICTED: LIM/homeobox protein Awh-like [Saccoglossus kowalevskii]
c23289.graph_c0	1.78519	0.043118	1.15852e-12	4.43101	up	--	--	--	--	--	--	Starch binding domain	--	proteophosphoglycan 5 [Leishmania major strain Friedlin]
c23299.graph_c0	1.47661	0.0267486	5.11576e-09	4.3468	up
c23611.graph_c0	1.93534	0.0375045	2.30797e-08	4.25247	up	--	--	--	K09276|2e-82|dre:795398|ybx1, MGC158477, MGC174067, MGC174962, MGC85599, hm:zeh0308, nsep1, wu:fb01g10, wu:fb08c05, wu:fb16e10, wu:fj26c09, yb1, zfY1, zgc:85599	[J]	Translation, ribosomal structure and biogenesis	--	Y-box factor homolog OS=Aplysia californica (California sea hare) PE=2 SV=1	PREDICTED: nuclease-sensitive element-binding protein 1-like [Saccoglossus kowalevskii]
c23638.graph_c0	1.52515	0.0706048	5.86523e-06	3.51839	up	--	--	--	--	--	--	Centrosomal spindle body, CEP44	--	hypothetical protein TRIADDRAFT_26095 [Trichoplax adhaerens]
c23669.graph_c0	1.92124	0	2.54341e-12	5.36253	up	--	--	Molecular Function: binding (GO:0005488);;	K08054|0.0|dre:406757|canx, wu:fe06b12, zgc:63524	[O]	Posttranslational modification, protein turnover, chaperones	Calreticulin family	Calnexin {ECO:0000250|UniProtKB:P34652} (Precursor) OS=Caenorhabditis briggsae PE=3 SV=3	hypothetical protein BRAFLDRAFT_204584 [Branchiostoma floridae]
c23681.graph_c0	2.24623	0	0	6.01784	up	--	--	--	--	[M]	Cell wall/membrane/envelope biogenesis	Pectinacetylesterase;; Pectinacetylesterase	--	hypothetical protein BRAFLDRAFT_275198 [Branchiostoma floridae]
c23834.graph_c0	0	1.20201	3.85803e-13	-5.51934	down	[R]	General function prediction only	--	K13126|1e-168|tca:657776|similar to poly A binding protein	[AJ]	--	RNA recognition motif. (a.k.a. RRM, RBD, or RNP domain);; RNA recognition motif (a.k.a. RRM, RBD, or RNP domain);; RNA recognition motif. (a.k.a. RRM, RBD, or RNP domain);; Poly-adenylate binding protein, unique domain;; RNA binding motif;; Limkain b1	Polyadenylate-binding protein GN=pAbp OS=Drosophila melanogaster (Fruit fly) PE=1 SV=3	Polyadenylate-binding protein 1 [Zootermopsis nevadensis]
c24291.graph_c0	1.9376	0	3.84426e-06	4.44544	up	--	--	--	--	[T]	Signal transduction mechanisms	Calcium-binding EGF domain	Transmembrane cell adhesion receptor mua-3 (Precursor) GN=mua-3 OS=Caenorhabditis elegans PE=1 SV=2	hypothetical protein PTSG_11950 [Salpingoeca rosetta]
c24340.graph_c0	0.0845021	3.66154	3.77433e-09	-4.383	down	[J]	Translation, ribosomal structure and biogenesis	Molecular Function: structural constituent of ribosome (GO:0003735);; Cellular Component: ribosome (GO:0005840);; Biological Process: translation (GO:0006412);;	K02894|4e-82|dre:336812|rpl23, MGC73149, fb06e03, wu:fb06e03, zgc:73149	[J]	Translation, ribosomal structure and biogenesis	Ribosomal protein L14p/L23e	60S ribosomal protein L23 GN=RpL23-C OS=Aedes aegypti (Yellowfever mosquito) PE=2 SV=1	60S ribosomal protein L23 [Placozoa sp. H4]
c24383.graph_c0	1.25324	0.0183212	2.49732e-11	4.64791	up	--	--	--	K09289|2e-98|dre:394104|MGC55307, NCOA4, zgc:77270	--	--	Nuclear coactivator	--	PREDICTED: uncharacterized protein LOC585371 [Strongylocentrotus purpuratus]
c24487.graph_c0	0.99004	0.117855	0.00493254	2.51804	up
c24494.graph_c0	0	1.56815	1.81511e-08	-4.89697	down	[P]	Inorganic ion transport and metabolism	Molecular Function: catalytic activity (GO:0003824);;	--	[P]	Inorganic ion transport and metabolism	Carbonic anhydrase	Beta carbonic anhydrase 1 GN=bca-1 OS=Caenorhabditis elegans PE=3 SV=1	PREDICTED: carbonic anhydrase 1-like [Ceratitis capitata]
c24705.graph_c0	2.82796	0.0872777	0.000108896	3.60771	up	--	--	--	--	[S]	Function unknown	Uncharacterised protein family (UPF0240)	Protein NDUFAF4 homolog GN=CG11722 OS=Drosophila melanogaster (Fruit fly) PE=1 SV=1	PREDICTED: NADH dehydrogenase [ubiquinone] 1 alpha subcomplex assembly factor 4-like [Saccoglossus kowalevskii]
c25551.graph_c0	1.13383	0.0449905	2.95648e-07	3.73307	up	--	--	Biological Process: embryonic development via the syncytial blastoderm (GO:0001700);; Biological Process: tissue homeostasis (GO:0001894);; Molecular Function: sodium:potassium-exchanging ATPase activity (GO:0005391);; Molecular Function: ATP binding (GO:0005524);; Cellular Component: nucleus (GO:0005634);; Cellular Component: sodium:potassium-exchanging ATPase complex (GO:0005890);; Cellular Com…	K01539|0.0|dre:64612|atp1a1, atp1a1a.1, atp1a1l1, atp[a]1B1, cb70, wu:fa03c03, wu:fb92h10	[P]	Inorganic ion transport and metabolism	haloacid dehalogenase-like hydrolase;; Putative hydrolase of sodium-potassium ATPase alpha subunit;; Cation transporting ATPase, C-terminus;; haloacid dehalogenase-like hydrolase;; haloacid dehalogenase-like hydrolase	Sodium/potassium-transporting ATPase subunit alpha GN=Atpalpha OS=Drosophila melanogaster (Fruit fly) PE=1 SV=3	PREDICTED: sodium/potassium-transporting ATPase subunit alpha-1 isoform X1 [Saccoglossus kowalevskii]
c26022.graph_c0	2.64792	0	6.83519e-06	4.39717	up
c26095.graph_c0	1.43162	0	1.35339e-10	5.14597	up	--	--	--	--	--	--	HAUS augmin-like complex subunit 6 N-terminus	Spidroin-2 (Fragment) OS=Nephila clavipes (Golden silk orbweaver) PE=2 SV=1	PREDICTED: uncharacterized protein LOC762945 isoform 2 [Strongylocentrotus purpuratus]
c26107.graph_c0	0.876805	0	3.99625e-07	4.6238	up	[R]	General function prediction only	--	--	--	--	BAAT / Acyl-CoA thioester hydrolase C terminal;; Acyl-CoA thioester hydrolase/BAAT N-terminal region;; Prolyl oligopeptidase family;; Dienelactone hydrolase family;; Alpha/beta hydrolase family;; Alpha/beta hydrolase family	--	hypothetical protein BRAFLDRAFT_72274 [Branchiostoma floridae]
c26393.graph_c0	0.0258889	1.38066	2.22314e-11	-4.67499	down	[G]	Carbohydrate transport and metabolism	Molecular Function: nucleotide binding (GO:0000166);; Molecular Function: phosphoglycerate kinase activity (GO:0004618);; Biological Process: phosphorylation (GO:0016310);;	K00927|1e-123|tad:TRIADDRAFT_63295|hypothetical protein	[G]	Carbohydrate transport and metabolism	Phosphoglycerate kinase	Phosphoglycerate kinase GN=PGK OS=Schistosoma mansoni (Blood fluke) PE=1 SV=1	phosphoglycerate kinase 1 [Bigelowiella natans]
c26478.graph_c0	1.52631	0.0317963	1.06719e-07	4.15153	up	[V]	Defense mechanisms	--	--	--	--	Beta-lactamase enzyme family;; Beta-lactamase;; PemK-like protein	--	hypothetical protein, conserved [Eimeria maxima]
c26595.graph_c0	0.0538924	1.84122	5.55092e-07	-4.05088	down	--	--	--	K10802|5e-25|dre:321622|hmgb1, fb23c02, ik:tdsubc_1a5, wu:fb23c02, xx:tdsubc_1a5, zgc:56110, zgc:77104	[R]	General function prediction only	HMG (high mobility group) box;; HMG-box domain	Mobility group protein 1A GN=HMG1A OS=Chironomus tentans (Midge) PE=3 SV=1	predicted protein [Naegleria gruberi]
c27050.graph_c0	1.7493	0	6.83519e-06	4.39717	up	--	--	--	--	[R]	General function prediction only	Rdx family	SelT-like protein (Precursor) GN=CG3887 OS=Drosophila melanogaster (Fruit fly) PE=2 SV=1	PREDICTED: LOW QUALITY PROTEIN: selenoprotein T-like [Strongylocentrotus purpuratus]
c27310.graph_c0	0.358554	2.46492	0.00235606	-2.57838	down	[G]	Carbohydrate transport and metabolism	Molecular Function: nucleotide binding (GO:0000166);; Biological Process: metabolic process (GO:0008152);; Molecular Function: oxidoreductase activity (GO:0016491);;	K00134|7e-95|cin:100186457|similar to Glyceraldehyde-3-phosphate dehydrogenase (GAPDH)	[G]	Carbohydrate transport and metabolism	Glyceraldehyde 3-phosphate dehydrogenase, C-terminal domain;; Glyceraldehyde 3-phosphate dehydrogenase, NAD binding domain;; CP12 domain	Glyceraldehyde-3-phosphate dehydrogenase, cytosolic OS=Trypanosoma brucei brucei PE=1 SV=3	PREDICTED: glyceraldehyde-3-phosphate dehydrogenase, chromosomal-like [Amphimedon queenslandica]
c27361.graph_c0	0	1.28387	1.19999e-05	-4.39842	down	--	--	--	--	--	--	AP2 domain	Procyclic form-specific polypeptide (Precursor) GN=PROA OS=Trypanosoma brucei brucei PE=2 SV=1	GE26375 [Drosophila yakuba]
c27943.graph_c0	4.89542	0.0420544	0	5.40065	up	[P]	Inorganic ion transport and metabolism	Molecular Function: ferroxidase activity (GO:0004322);; Cellular Component: cytoplasm (GO:0005737);; Biological Process: iron ion transport (GO:0006826);; Biological Process: cellular iron ion homeostasis (GO:0006879);; Molecular Function: ferric iron binding (GO:0008199);; Biological Process: oxidation-reduction process (GO:0055114);;	K00522|1e-103|dre:436651|cb141, fj01a11, fj24b11, fth, sb:cb141, wu:fj01a11, wu:fj24b11	[P]	Inorganic ion transport and metabolism	Ferritin-like domain	Soma ferritin OS=Lymnaea stagnalis (Great pond snail) PE=2 SV=2	Ferritin, middle subunit [Caligus rogercresseyi]
c28102.graph_c0	3.29065	0	1.3174e-07	4.70534	up
c28199.graph_c0	2.38143	0.0400891	0	4.94316	up	--	--	--	--	--	--	Zona pellucida-like domain	--	hypothetical protein BRAFLDRAFT_90506 [Branchiostoma floridae]
c28220.graph_c0	3.53262	0.163538	5.86523e-06	3.51839	up
c28266.graph_c0	2.15149	0.108655	2.69098e-05	3.39774	up	--	--	--	K09290|2e-08|dre:373076|tpm3, MGC77592, cb674, fa17b11, fb83b01, fk41e01, hm:zeh0298, wu:fa17b11, wu:fb83b01, wu:fk41e01, zeh0298, zgc:77592	[Z]	Cytoskeleton	Tropomyosin	--	--
c28269.graph_c0	3.58335	0	1.4938e-08	4.85578	up	[K]	Transcription	Molecular Function: RNA binding (GO:0003723);; Cellular Component: nucleus (GO:0005634);; Cellular Component: ribonucleoprotein complex (GO:0030529);;	K11086|1e-100|xla:379853|snrpn, MGC52854	[K]	Transcription	LSM domain	Small nuclear ribonucleoprotein-associated protein B GN=SmB OS=Drosophila melanogaster (Fruit fly) PE=1 SV=1	PREDICTED: small nuclear ribonucleoprotein-associated protein B&apos;-like [Saccoglossus kowalevskii]
c28347.graph_c0	2.43478	0.0209162	0	5.40065	up	--	--	--	K11291|1e-170|dre:799570|nasp, MGC56007, MGC85651, wu:fd20g12, zgc:56007, zgc:85651	[BD]	--	SHNi-TPR;; Tetratricopeptide repeat;; TPR repeat;; Tetratricopeptide repeat;; Tetratricopeptide repeat	Protein HGV2 GN=HGV2 OS=Halocynthia roretzi (Sea squirt) PE=2 SV=1	PREDICTED: histone-binding protein N1/N2 [Strongylocentrotus purpuratus]
c28398.graph_c0	3.35976	0.0965393	3.63594e-05	3.7059	up	[J]	Translation, ribosomal structure and biogenesis	Molecular Function: structural constituent of ribosome (GO:0003735);; Cellular Component: ribosome (GO:0005840);; Biological Process: translation (GO:0006412);;	K02929|4e-76|dre:195819|rpl36a, rl44	[J]	Translation, ribosomal structure and biogenesis	Ribosomal protein L44	60S ribosomal protein L44 GN=rpl-41 OS=Caenorhabditis elegans PE=3 SV=2	ribosomal protein L36a [Branchiostoma belcheri tsingtauense]
c28464.graph_c0	2.57188	0	3.93446e-05	4.24187	up	--	--	--	--	[P]	Inorganic ion transport and metabolism	Metallothionein	Copper-specific metallothionein-2 OS=Callinectes sapidus (Blue crab) PE=3 SV=1	Metallothionein [Crassostrea gigas]
c28529.graph_c0	3.19704	0.028957	0	5.32541	up	[HC]	--	Molecular Function: oxidoreductase activity (GO:0016491);; Biological Process: oxidation-reduction process (GO:0055114);;	K00326|1e-172|dre:324560|cyb5r3, fc32h03, wu:fc32h03, zgc:77071	[HC]	--	Oxidoreductase FAD-binding domain;; Oxidoreductase NAD-binding domain;; Ferric reductase NAD binding domain	NADH-cytochrome b5 reductase 1 GN=cyb5r1 OS=Dictyostelium discoideum (Slime mold) PE=3 SV=1	NADH-cytochrome b5 reductase 2 [Crassostrea gigas]
c28781.graph_c0	2.29061	0	6.00187e-13	5.43603	up	--	--	--	K14443|3e-98|dre:378946|btg4	[TR]	--	BTG family	BTG family protein GN=btg OS=Dictyostelium discoideum (Slime mold) PE=3 SV=1	b-cell translocation protein [Riptortus pedestris]
c28905.graph_c0	2.03879	0.0666231	3.89788e-09	4.00497	up	[R]	General function prediction only	Biological Process: metabolic process (GO:0008152);;	K00044|0.0|dre:327417|hsd17b12a, fi06g11, wu:fi06g11, zgc:55589, zgc:77599	[I]	Lipid transport and metabolism	short chain dehydrogenase;; KR domain	Very-long-chain 3-oxooacyl-coA reductase let-767 GN=let-767 OS=Caenorhabditis elegans PE=1 SV=2	PREDICTED: estradiol 17-beta-dehydrogenase 12-B-like [Saccoglossus kowalevskii]
c28990.graph_c0	2.36279	0.0404564	0	5.13398	up	[O]	Posttranslational modification, protein turnover, chaperones	Molecular Function: ATP binding (GO:0005524);; Cellular Component: cytoplasm (GO:0005737);; Biological Process: response to stress (GO:0006950);; Biological Process: protein refolding (GO:0042026);;	K04077|0.0|dre:282676|hspd1, cb863, cpn60, fa04a05, fb22d10, fi27b05, id:ibd2197, sb:cb144, wu:fa04a05, wu:fb22d10, wu:fi04a12, wu:fi27b05	[O]	Posttranslational modification, protein turnover, chaperones	TCP-1/cpn60 chaperonin family	60 kDa heat shock protein, mitochondrial (Precursor) GN=Hsp60 OS=Drosophila melanogaster (Fruit fly) PE=1 SV=3	hypothetical protein BRAFLDRAFT_115228 [Branchiostoma floridae]
c29013.graph_c0	3.5107	0.0731353	1.13243e-14	4.64048	up	--	--	--	--	[I]	Lipid transport and metabolism	GNS1/SUR4 family	Putative fatty acid elongation protein 3 GN=elo-3 OS=Caenorhabditis elegans PE=1 SV=2	hypothetical protein CAPTEDRAFT_136876 [Capitella teleta]
c29064.graph_c0	9.52616	0.111803	0	5.45746	up	--	--	Biological Process: morphogenesis of an epithelium (GO:0002009);; Biological Process: nematode larval development (GO:0002119);; Molecular Function: motor activity (GO:0003774);; Molecular Function: protein binding (GO:0005515);; Cellular Component: cytoplasmic dynein complex (GO:0005868);; Biological Process: DNA replication (GO:0006260);; Biological Process: receptor-mediated endocytosis (GO:00…	--	[Z]	Cytoskeleton	Dynein light chain type 1	Dynein light chain 2, cytoplasmic GN=Cdlc2 OS=Drosophila melanogaster (Fruit fly) PE=3 SV=1	Chain A, Lc8 - Ana2 (159-168) Complex
c29190.graph_c0	4.76544	0	0	5.91876	up	--	--	--	K12881|1e-127|dre:560127|MGC171753	[A]	RNA processing and modification	RNA recognition motif. (a.k.a. RRM, RBD, or RNP domain);; RNA recognition motif (a.k.a. RRM, RBD, or RNP domain);; RNA recognition motif. (a.k.a. RRM, RBD, or RNP domain)	RNA-binding protein cabeza GN=caz OS=Drosophila melanogaster (Fruit fly) PE=2 SV=2	PREDICTED: THO complex subunit 4-A-like [Strongylocentrotus purpuratus]
c29342.graph_c0	0.402213	5.13909	9.93716e-12	-3.56201	down	--	--	--	--	--	--	Photosystem I psaG / psaK	--	--
c29343.graph_c0	0	3.95006	4.35881e-09	-4.9911	down	--	--	Molecular Function: binding (GO:0005488);;	K13195|4e-33|bfo:BRAFLDRAFT_71461|hypothetical protein	[R]	General function prediction only	RNA recognition motif. (a.k.a. RRM, RBD, or RNP domain)	RNA-binding protein cabeza GN=caz OS=Drosophila melanogaster (Fruit fly) PE=2 SV=2	hypothetical protein BRAFLDRAFT_71461 [Branchiostoma floridae]
c29584.graph_c0	3.79542	0	0	6.50147	up	--	--	--	K12561|1e-53|gga:396473|myristoylated alanine-rich C kinase substrate (MARCKS)	--	--	MARCKS family	Enolase-phosphatase E1 GN=CPIJ009638 OS=Culex quinquefasciatus (Southern house mosquito) PE=3 SV=1	hypothetical protein [Monosiga brevicollis MX1]
c29692.graph_c0	0.401718	3.01271	6.04679e-05	-2.76377	down	--	--	--	--	[L]	Replication, recombination and repair	--	--	PREDICTED: zinc finger BED domain-containing protein 1-like [Strongylocentrotus purpuratus]
c29761.graph_c0	0.908757	11.6112	9.93716e-12	-3.56201	down	--	--	--	K14716|2e-11|bfo:BRAFLDRAFT_123712|hypothetical protein	--	--	--	LIM domain-containing protein A GN=limA OS=Dictyostelium discoideum (Slime mold) PE=2 SV=1	hypothetical protein BRAFLDRAFT_123712 [Branchiostoma floridae]
c29770.graph_c0	0	2.07801	1.71917e-10	-5.18946	down
c29780.graph_c0	4.08523	0	1.35339e-10	5.14597	up
c29939.graph_c0	0	4.27819	5.8753e-13	-5.49812	down
c29969.graph_c0	0	2.64829	3.2323e-12	-5.40998	down	[J]	Translation, ribosomal structure and biogenesis	Molecular Function: translation elongation factor activity (GO:0003746);; Molecular Function: GTPase activity (GO:0003924);; Molecular Function: GTP binding (GO:0005525);; Biological Process: GTP catabolic process (GO:0006184);; Biological Process: translational elongation (GO:0006414);; Cellular Component: chloroplast stroma (GO:0009570);; Molecular Function: transferase activity (GO:0016740);;	--	[J]	Translation, ribosomal structure and biogenesis	Elongation factor Tu C-terminal domain;; Elongation factor Tu domain 2;; Elongation factor Tu GTP binding domain;; Elongation factor Tu domain 4	Elongation factor Tu, mitochondrial GN=TUFA OS=Reclinomonas americana PE=3 SV=1	elongation factor Tu [Bigelowiella natans]
c30000.graph_c1	1.80341	0	3.84426e-06	4.44544	up	[O]	Posttranslational modification, protein turnover, chaperones	Molecular Function: antioxidant activity (GO:0016209);; Molecular Function: oxidoreductase activity (GO:0016491);;	K11188|2e-97|dre:393778|prdx6, MGC73360, zgc:73360	[O]	Posttranslational modification, protein turnover, chaperones	AhpC/TSA family;; C-terminal domain of 1-Cys peroxiredoxin;; Redoxin	Putative peroxiredoxin GN=TSA OS=Onchocerca volvulus PE=2 SV=1	hypothetical protein LOTGIDRAFT_225601 [Lottia gigantea]
c30218.graph_c0	2.29254	0	0	5.96915	up	--	--	--	--	--	--	--	Adhesive plaque matrix protein (Fragment) GN=FP1 OS=Mytilus edulis (Blue mussel) PE=1 SV=1	PREDICTED: SH3 domain-containing protein C23A1.17-like isoform X4 [Aplysia californica]
c30223.graph_c0	2.67022	0	7.60475e-08	4.74445	up	[S]	Function unknown	Cellular Component: nucleus (GO:0005634);; Biological Process: DNA replication (GO:0006260);;	K10733|1e-104|dre:554146|gins2, si:dkey-265o13.3, zgc:112262	[S]	Function unknown	GINS complex protein	Probable DNA replication complex GINS protein PSF2 GN=Psf2 OS=Drosophila melanogaster (Fruit fly) PE=2 SV=1	hypothetical protein BRAFLDRAFT_118797 [Branchiostoma floridae]
c30262.graph_c0	0	2.22602	1.19999e-05	-4.39842	down	[P]	Inorganic ion transport and metabolism	--	--	--	--	Glycine rich protein family	Chorion protein S38 GN=Cp38 OS=Drosophila melanogaster (Fruit fly) PE=2 SV=1	GF12534 [Drosophila ananassae]
c30279.graph_c0	0.248955	1.11505	0.00287724	-2.14539	down
c30313.graph_c0	1.00077	0	2.18657e-05	4.29552	up	[L]	Replication, recombination and repair	--	--	--	--	Transposase domain (DUF772)	--	--
c30364.graph_c0	0.0727047	3.87736	2.22314e-11	-4.67499	down	[E]	Amino acid transport and metabolism	Molecular Function: glutamate-ammonia ligase activity (GO:0004356);; Cellular Component: cytoplasm (GO:0005737);; Biological Process: glutamate catabolic process (GO:0006538);; Biological Process: glutamine biosynthetic process (GO:0006542);; Biological Process: synapse assembly (GO:0007416);; Biological Process: neurotransmitter receptor metabolic process (GO:0045213);;	K01915|1e-148|dpe:Dper_GL14860|GL14860 gene product from transcript GL14860-RA	[E]	Amino acid transport and metabolism	Glutamine synthetase, catalytic domain;; Glutamine synthetase, beta-Grasp domain	Glutamine synthetase 2 cytoplasmic GN=Gs2 OS=Drosophila melanogaster (Fruit fly) PE=2 SV=3	glutamine synthetase [Acanthamoeba castellanii str. Neff]
c30461.graph_c0	2.10154	0	1.78821e-09	4.992	up	[J]	Translation, ribosomal structure and biogenesis	--	K03232|1e-133|dre:560745|eef1db, MGC114052, eef1d, im:7233939, si:dkey-235d18.4, wu:fa14f09, zgc:114052	[K]	Transcription	EF-1 guanine nucleotide exchange domain;; Eukaryotic elongation factor 1 beta central acidic region	Probable elongation factor 1-delta GN=eEF1delta OS=Drosophila melanogaster (Fruit fly) PE=1 SV=1	hypothetical protein BRAFLDRAFT_198650 [Branchiostoma floridae]
c30533.graph_c0	2.22999	0	1.06045e-09	5.02414	up	[I]	Lipid transport and metabolism	Molecular Function: transferase activity, transferring acyl groups (GO:0016746);;	K08764|2e-38|mcc:715765|non-specific lipid-transfer protein-like	[I]	Lipid transport and metabolism	SCP-2 sterol transfer family;; Alkyl sulfatase C-terminal	3-hydroxyacyl-CoA dehydrogenase GN=mfeA OS=Dictyostelium discoideum (Slime mold) PE=2 SV=1	PREDICTED: non-specific lipid-transfer protein-like [Strongylocentrotus purpuratus]
c30727.graph_c0	4.14424	0.0388015	0	5.27831	up	[R]	General function prediction only	Molecular Function: nucleotide binding (GO:0000166);; Molecular Function: RNA binding (GO:0003723);;	K13126|0.0|dre:393856|pabpc1b, MGC77608, pabpc1, zgc:77608	[AJ]	--	RNA recognition motif. (a.k.a. RRM, RBD, or RNP domain);; RNA recognition motif (a.k.a. RRM, RBD, or RNP domain);; RNA recognition motif. (a.k.a. RRM, RBD, or RNP domain);; Limkain b1;; Nup53/35/40-type RNA recognition motif;; RNA binding motif	Polyadenylate-binding protein GN=pAbp OS=Drosophila melanogaster (Fruit fly) PE=1 SV=3	Polyadenylate-binding protein 1, partial [Stegodyphus mimosarum]
c30895.graph_c0	2.02967	0.0735346	4.22069e-08	3.86028	up	--	--	--	K01527|1e-100|bta:281031|BTF3, MGC128310	[K]	Transcription	NAC domain	Transcription factor BTF3 homolog GN=icd-1 OS=Caenorhabditis elegans PE=1 SV=1	PREDICTED: transcription factor BTF3 homolog 4-like [Saccoglossus kowalevskii]
c30900.graph_c0	2.21471	0	1.06045e-09	5.02414	up	--	--	Biological Process: mitotic spindle assembly checkpoint (GO:0007094);;	K02537|1e-120|dre:550434|mad2l1, cb408, zgc:112133	[DZ]	--	HORMA domain	Mitotic spindle assembly checkpoint protein MAD2A GN=mad2l1-2 OS=Dictyostelium discoideum (Slime mold) PE=3 SV=1	hypothetical protein BRAFLDRAFT_260671 [Branchiostoma floridae]
c30992.graph_c0	4.69615	0.0954446	6.38809e-08	4.18596	up
c31118.graph_c0	1.47625	0.0424184	3.63594e-05	3.7059	up
c31191.graph_c0	6.01098	0.0747591	0	5.37464	up	[J]	Translation, ribosomal structure and biogenesis	Molecular Function: structural constituent of ribosome (GO:0003735);; Cellular Component: ribosome (GO:0005840);; Biological Process: translation (GO:0006412);; Molecular Function: 5S rRNA binding (GO:0008097);;	K02932|0.0|dre:415196|rpl5b, rpl5, wu:fj02g05, zgc:86854	[J]	Translation, ribosomal structure and biogenesis	Ribosomal L18p/L5e family;; Ribosomal L18 C-terminal region	60S ribosomal protein L5 GN=RPL5 OS=Styela clava (Sea squirt) PE=3 SV=3	PREDICTED: 60S ribosomal protein L5 [Ciona intestinalis]
c31307.graph_c0	3.26095	0.0382718	4.37428e-14	4.95796	up	--	--	--	K13443|4e-76|dre:282673|npc2, cb292, sb:cb292	[S]	Function unknown	ML domain	Protein NPC2 homolog (Precursor) GN=Npc2a OS=Drosophila melanogaster (Fruit fly) PE=1 SV=1	predicted protein [Nematostella vectensis]
c31374.graph_c0	5.0814	0	0	6.00179	up	--	--	Cellular Component: nucleosome (GO:0000786);; Molecular Function: DNA binding (GO:0003677);; Cellular Component: lipid particle (GO:0005811);; Biological Process: nucleosome assembly (GO:0006334);; Cellular Component: NuA4 histone acetyltransferase complex (GO:0035267);; Molecular Function: protein heterodimerization activity (GO:0046982);;	K11252|2e-65|dre:436997|zgc:92591	[B]	Chromatin structure and dynamics	Core histone H2A/H2B/H3/H4;; Histone-like transcription factor (CBF/NF-Y) and archaeal histone	Histone H2B.1/H2B.2 OS=Tigriopus californicus (Marine copepod) PE=3 SV=2	late histone H2B.L4 [Culex quinquefasciatus]
c31397.graph_c0	3.63662	0.0244382	0	5.75048	up	[C]	Energy production and conversion	Biological Process: tricarboxylic acid cycle (GO:0006099);; Biological Process: malate metabolic process (GO:0006108);; Molecular Function: L-malate dehydrogenase activity (GO:0030060);; Biological Process: cellular carbohydrate metabolic process (GO:0044262);;	K00026|0.0|dre:406405|wu:fj48c08, wu:fj55d06	[C]	Energy production and conversion	lactate/malate dehydrogenase, alpha/beta C-terminal domain;; lactate/malate dehydrogenase, NAD binding domain;; Semialdehyde dehydrogenase, NAD binding domain;; 3-beta hydroxysteroid dehydrogenase/isomerase family	Probable malate dehydrogenase, mitochondrial (Precursor) GN=mdh-2 OS=Caenorhabditis elegans PE=3 SV=1	PREDICTED: malate dehydrogenase, mitochondrial-like [Saccoglossus kowalevskii]
c31464.graph_c0	3.90934	0	5.13436e-09	4.9255	up	--	--	--	--	--	--	Phosphorylase superfamily	--	hypothetical protein, partial [Hirudo medicinalis]
c31524.graph_c0	2.01776	0	2.17049e-06	4.49214	up	--	--	--	--	[R]	General function prediction only	Nop53 (60S ribosomal biogenesis)	Uncharacterized protein CG1785 GN=CG1785 OS=Drosophila melanogaster (Fruit fly) PE=1 SV=1	predicted protein [Nematostella vectensis]
c31552.graph_c0	17.1609	0.535895	0	4.73095	up	--	--	--	--	--	--	Zona pellucida-like domain	--	--
c31574.graph_c0	1.28722	0.0429048	0.000329727	3.50233	up	--	--	Molecular Function: binding (GO:0005488);;	--	[L]	Replication, recombination and repair	hAT family C-terminal dimerisation region	--	PREDICTED: zinc finger BED domain-containing protein 1-like [Amphimedon queenslandica]
c31612.graph_c0	7.83967	0	1.06045e-09	5.02414	up	--	--	Cellular Component: intracellular organelle (GO:0043229);;	--	--	--	--	Protamine OS=Phorcus turbinatus (Sea snail) PE=1 SV=1	unnamed protein product [Haemonchus contortus]
c31727.graph_c0	38.404	0.622251	0	5.50932	up
c31903.graph_c0	6.22491	0	0	7.13729	up	[C]	Energy production and conversion	Molecular Function: L-lactate dehydrogenase activity (GO:0004459);; Cellular Component: cytoplasm (GO:0005737);; Biological Process: glycolysis (GO:0006096);; Biological Process: cellular carbohydrate metabolic process (GO:0044262);; Biological Process: oxidation-reduction process (GO:0055114);;	K00016|0.0|dre:30497|ldhba, LDH-B-A, ldhb, wu:fa16d07, wu:fa20c10, wu:fa96a08	[C]	Energy production and conversion	lactate/malate dehydrogenase, NAD binding domain;; lactate/malate dehydrogenase, alpha/beta C-terminal domain	L-lactate dehydrogenase GN=ldh-1 OS=Caenorhabditis elegans PE=2 SV=1	PREDICTED: l-lactate dehydrogenase-like isoform 1 [Bombus terrestris]
c31912.graph_c0	1.91837	0.057091	6.28363e-05	3.65764	up	--	--	Molecular Function: ubiquitin-protein ligase activity (GO:0004842);; Biological Process: protein ubiquitination (GO:0016567);;	K06689|1e-131|dre:563542|MGC171646	[O]	Posttranslational modification, protein turnover, chaperones	Ubiquitin-conjugating enzyme	Ubiquitin-conjugating enzyme E2-24 kDa GN=UbcD2 OS=Drosophila melanogaster (Fruit fly) PE=2 SV=1	hypothetical protein BRAFLDRAFT_66988 [Branchiostoma floridae]
c31930.graph_c0	0.348451	2.03251	0.000606184	-2.45794	down	--	--	Molecular Function: hydrolase activity (GO:0016787);;	K04396|3e-30|spu:584221|hypothetical LOC584221	[D]	Cell cycle control, cell division, chromosome partitioning	Caspase domain	Caspase-1 subunit p12 (Precursor) OS=Spodoptera frugiperda (Fall armyworm) PE=1 SV=1	PREDICTED: caspase-6-like [Strongylocentrotus purpuratus]
c32004.graph_c0	3.79605	0.0243323	0	5.81791	up	--	--	--	K05611|5e-98|dre:325119|uchl1, cb358, wu:fc55h08	[O]	Posttranslational modification, protein turnover, chaperones	Ubiquitin carboxyl-terminal hydrolase, family 1	Ubiquitin carboxyl-terminal hydrolase GN=Uch OS=Drosophila melanogaster (Fruit fly) PE=2 SV=2	GK15133 [Drosophila willistoni]
c32090.graph_c0	0.15508	1.18888	4.0807e-05	-2.79447	down	[C]	Energy production and conversion	Molecular Function: malic enzyme activity (GO:0004470);; Molecular Function: binding (GO:0005488);; Molecular Function: oxidoreductase activity, acting on the CH-OH group of donors, NAD or NADP as acceptor (GO:0016616);; Biological Process: single-organism metabolic process (GO:0044710);;	K00029|1e-145|tad:TRIADDRAFT_50795|hypothetical protein	[C]	Energy production and conversion	Malic enzyme, NAD binding domain;; Malic enzyme, N-terminal domain	NAD-dependent malic enzyme, mitochondrial (Precursor; Fragment) OS=Ascaris suum (Pig roundworm) PE=1 SV=1	hypothetical protein DAPPUDRAFT_304467 [Daphnia pulex]
c32181.graph_c0	0	1.07944	1.19999e-05	-4.39842	down	[Z]	Cytoskeleton	Molecular Function: GTPase activity (GO:0003924);; Molecular Function: structural constituent of cytoskeleton (GO:0005200);; Molecular Function: GTP binding (GO:0005525);; Cellular Component: cytoplasm (GO:0005737);; Cellular Component: microtubule (GO:0005874);; Biological Process: GTP catabolic process (GO:0006184);; Biological Process: microtubule-based process (GO:0007017);; Biological Proces…	--	[Z]	Cytoskeleton	Tubulin C-terminal domain;; Tubulin/FtsZ family, GTPase domain	Tubulin alpha chain OS=Oxytricha granulifera PE=3 SV=1	alpha-tubulin, partial [Blepharisma japonicum]
c32187.graph_c0	1.35251	0.0512284	3.31023e-11	4.005	up	--	--	Biological Process: response to stress (GO:0006950);; Biological Process: signal transduction (GO:0007165);; Biological Process: neurogenesis (GO:0022008);; Cellular Component: intracellular part (GO:0044424);; Biological Process: single-organism developmental process (GO:0044767);;	--	[T]	Signal transduction mechanisms	Regulator of G protein signaling domain;; Raf-like Ras-binding domain;; GoLoco motif	Regulator of G-protein signaling loco GN=loco OS=Drosophila melanogaster (Fruit fly) PE=1 SV=2	hypothetical protein BRAFLDRAFT_84869 [Branchiostoma floridae]
c32219.graph_c0	0	4.37225	7.32747e-14	-5.60122	down	[LKJ]	--	--	--	--	--	Glycine rich protein family	rRNA 2&apos;-O-methyltransferase fibrillarin GN=fbl OS=Dictyostelium discoideum (Slime mold) PE=3 SV=1	secreted salivary gland peptide, putative [Ixodes scapularis]
c32456.graph_c0	3.69469	0	0	6.15477	up
c32653.graph_c0	1.83308	0	5.13436e-09	4.9255	up	[G]	Carbohydrate transport and metabolism	Biological Process: carbohydrate metabolic process (GO:0005975);; Molecular Function: hydrolase activity, acting on glycosyl bonds (GO:0016798);;	K01206|1e-132|oaa:100075754|similar to RP1-20N2.5	[G]	Carbohydrate transport and metabolism	Alpha-L-fucosidase	Alpha-L-fucosidase (Precursor) GN=BRAFLDRAFT_56888 OS=Branchiostoma floridae (Florida lancelet) PE=3 SV=2	hypothetical protein CAPTEDRAFT_177977 [Capitella teleta]
c32662.graph_c0	5.14228	0	0	5.96915	up
c32726.graph_c0	3.08163	0.024456	0	5.51343	up	[F]	Nucleotide transport and metabolism	Molecular Function: ribonucleoside-diphosphate reductase activity, thioredoxin disulfide as acceptor (GO:0004748);; Cellular Component: ribonucleoside-diphosphate reductase complex (GO:0005971);; Biological Process: DNA replication (GO:0006260);; Biological Process: activation of cysteine-type endopeptidase activity involved in apoptotic process (GO:0006919);; Biological Process: deoxyribonucleos…	K10808|0.0|dre:100330864|ribonucleoside-diphosphate reductase subunit M2-like	[F]	Nucleotide transport and metabolism	Ribonucleotide reductase, small chain	Ribonucleoside-diphosphate reductase small chain OS=Spisula solidissima (Atlantic surf-clam) PE=2 SV=2	PREDICTED: ribonucleoside-diphosphate reductase subunit M2-like [Saccoglossus kowalevskii]
c32785.graph_c0	4.78958	0	1.22009e-05	4.34724	up	[J]	Translation, ribosomal structure and biogenesis	Molecular Function: structural constituent of ribosome (GO:0003735);; Cellular Component: ribosome (GO:0005840);; Biological Process: translation (GO:0006412);;	K02918|1e-38|oaa:100085915|similar to ribosomal protein L35	[J]	Translation, ribosomal structure and biogenesis	Ribosomal L29 protein	60S ribosomal protein L35 GN=rpl-35 OS=Caenorhabditis elegans PE=3 SV=1	putative ribosomal protein L35 [Sipunculus nudus]
c32839.graph_c0	3.1108	0	3.02513e-09	4.95913	up	--	--	Molecular Function: binding (GO:0005488);; Biological Process: cellular process (GO:0009987);; Biological Process: developmental process (GO:0032502);; Biological Process: single-organism process (GO:0044699);;	--	[K]	Transcription	Helix-loop-helix DNA-binding domain	Twist-related protein GN=TWIST OS=Branchiostoma belcheri (Amphioxus) PE=2 SV=1	hypothetical protein BRAFLDRAFT_105675 [Branchiostoma floridae]
c32864.graph_c0	13.4799	0.209304	0	5.2738	up	[E]	Amino acid transport and metabolism	Molecular Function: glutamate-ammonia ligase activity (GO:0004356);; Biological Process: glutamine biosynthetic process (GO:0006542);;	K01915|0.0|dre:336473|glulb, fb11d08, gso2, hm:zehn1949, im:7153900, wu:fb11d08	[E]	Amino acid transport and metabolism	Glutamine synthetase, catalytic domain	Glutamine synthetase 2 cytoplasmic GN=Gs2 OS=Drosophila melanogaster (Fruit fly) PE=2 SV=3	Glutamine synthetase [Crassostrea gigas]
c33173.graph_c0	3.77191	0	1.10485e-11	5.28508	up
c33372.graph_c0	2.29475	0.0434586	1.39299e-08	4.2846	up	[J]	Translation, ribosomal structure and biogenesis	Molecular Function: nucleotide binding (GO:0000166);; Molecular Function: aminoacyl-tRNA ligase activity (GO:0004812);; Biological Process: tRNA aminoacylation for protein translation (GO:0006418);;	K01893|1e-142|dre:568332|nars, fb57a10, si:dkey-274m14.2, wu:fb57a10	[J]	Translation, ribosomal structure and biogenesis	OB-fold nucleic acid binding domain	Asparagine--tRNA ligase, cytoplasmic GN=nrs-1 OS=Caenorhabditis elegans PE=3 SV=1	hypothetical protein CAPTEDRAFT_148401 [Capitella teleta]
c33372.graph_c1	1.70435	0	6.00187e-13	5.43603	up	[J]	Translation, ribosomal structure and biogenesis	Molecular Function: nucleic acid binding (GO:0003676);; Molecular Function: asparagine-tRNA ligase activity (GO:0004816);; Molecular Function: ATP binding (GO:0005524);; Cellular Component: cytoplasm (GO:0005737);; Biological Process: asparaginyl-tRNA aminoacylation (GO:0006421);;	K01893|0.0|dre:568332|nars, fb57a10, si:dkey-274m14.2, wu:fb57a10	[J]	Translation, ribosomal structure and biogenesis	tRNA synthetases class II (D, K and N)	Asparagine--tRNA ligase, cytoplasmic GN=nrs-1 OS=Caenorhabditis elegans PE=3 SV=1	hypothetical protein CAPTEDRAFT_148401 [Capitella teleta]
c33588.graph_c0	4.96939	0.0394373	0	5.51343	up
c33601.graph_c0	1.59842	0	1.3174e-07	4.70534	up	[R]	General function prediction only	Biological Process: cellular process (GO:0009987);;	K07853|4e-71|dre:393109|rasl11b, MGC55750, wu:fc21f04, zgc:55750, zgc:77749	[R]	General function prediction only	Ras family;; Miro-like protein	Ras-like protein rasW (Precursor) GN=rasW OS=Dictyostelium discoideum (Slime mold) PE=3 SV=1	hypothetical protein LOTGIDRAFT_229706 [Lottia gigantea]
c33622.graph_c0	3.99223	0.103958	1.03186e-11	4.32472	up	[TZDR]	--	Molecular Function: calcium ion binding (GO:0005509);;	K10351|4e-87|dre:30429|mylz2, cb46, mlc2f, sb:cb46	[Z]	Cytoskeleton	EF-hand domain pair;; EF-hand domain;; EF hand;; EF-hand domain pair	Myosin regulatory light chain sqh GN=sqh OS=Drosophila melanogaster (Fruit fly) PE=1 SV=1	hypothetical protein LOTGIDRAFT_230842 [Lottia gigantea]
c33778.graph_c0	0.940831	6.27184	0.00357629	-2.53594	down
c33937.graph_c0	3.20938	0.0427893	0	5.27541	up	[F]	Nucleotide transport and metabolism	Molecular Function: phosphoribosylaminoimidazolesuccinocarboxamide synthase activity (GO:0004639);; Molecular Function: ATP binding (GO:0005524);; Biological Process: 'de novo' IMP biosynthetic process (GO:0006189);; Molecular Function: 5-(carboxyamino)imidazole ribonucleotide mutase activity (GO:0034023);;	K01587|0.0|dre:321193|paics, cb293, sb:cb293, wu:fa28a05	[F]	Nucleotide transport and metabolism	SAICAR synthetase;; AIR carboxylase	Phosphoribosylaminoimidazole carboxylase OS=Drosophila melanogaster (Fruit fly) PE=2 SV=2	PREDICTED: multifunctional protein ADE2-like [Aplysia californica]
c33982.graph_c0	27.4129	0	0	7.64583	up
c34083.graph_c0	0	2.76687	7.75685e-08	-4.79626	down	--	--	--	--	--	--	Phloem filament protein PP1	--	--
c34102.graph_c0	2.44078	0	0	5.84871	up	[R]	General function prediction only	Molecular Function: GTP binding (GO:0005525);; Cellular Component: intracellular (GO:0005622);; Biological Process: small GTPase mediated signal transduction (GO:0007264);; Cellular Component: membrane (GO:0016020);;	K04513|1e-129|dre:436718|rhoad, zgc:92350	[R]	General function prediction only	Ras family;; Miro-like protein;; ADP-ribosylation factor family;; Elongation factor Tu GTP binding domain	Ras-like GTP-binding protein RHO (Precursor) GN=RHO OS=Aplysia californica (California sea hare) PE=2 SV=1	PREDICTED: transforming protein RhoA-like [Saccoglossus kowalevskii]
c34199.graph_c0	4.33937	0.0423742	0	5.93827	up	--	--	--	--	[A]	RNA processing and modification	--	--	82 kDa gametocyte antigen, related [Eimeria mitis]
c34348.graph_c0	3.37462	29.9749	0	-3.27795	down
c34414.graph_c0	1.81918	0	6.99841e-07	4.58123	up	[R]	General function prediction only	--	K09191|3e-98|dre:445389|gtf3aa, TFIIIA, gtf3a, zgc:111799	[R]	General function prediction only	Zinc finger, C2H2 type;; C2H2-type zinc finger;; Zinc-finger double domain	Pair-rule protein odd-paired GN=opa OS=Drosophila melanogaster (Fruit fly) PE=2 SV=2	hypothetical protein BRAFLDRAFT_283312 [Branchiostoma floridae]
c34655.graph_c0	4.78748	0	0	6.23934	up	[J]	Translation, ribosomal structure and biogenesis	Molecular Function: structural constituent of ribosome (GO:0003735);; Cellular Component: ribosome (GO:0005840);; Biological Process: translation (GO:0006412);;	K02925|0.0|dre:322571|rpl3, MGC110350, wu:fa99g02, wu:fb65e09, zgc:110350	[J]	Translation, ribosomal structure and biogenesis	Ribosomal protein L3	60S ribosomal protein L3 GN=RpL3 OS=Drosophila melanogaster (Fruit fly) PE=1 SV=3	hypothetical protein BRAFLDRAFT_126055 [Branchiostoma floridae]
c34655.graph_c1	6.51111	0	3.99625e-07	4.6238	up	[J]	Translation, ribosomal structure and biogenesis	Molecular Function: structural constituent of ribosome (GO:0003735);; Cellular Component: ribosome (GO:0005840);; Biological Process: translation (GO:0006412);;	--	[J]	Translation, ribosomal structure and biogenesis	Ribosomal protein L3	60S ribosomal protein L3 GN=RPL3 OS=Toxocara canis (Canine roundworm) PE=2 SV=2	hypothetical protein HELRODRAFT_182425 [Helobdella robusta]
c35104.graph_c0	5.00249	0.0204338	0	6.4624	up	[J]	Translation, ribosomal structure and biogenesis	Biological Process: nematode larval development (GO:0002119);; Molecular Function: translation elongation factor activity (GO:0003746);; Molecular Function: GTPase activity (GO:0003924);; Molecular Function: GTP binding (GO:0005525);; Cellular Component: cytoplasm (GO:0005737);; Biological Process: GTP catabolic process (GO:0006184);; Biological Process: translational elongation (GO:0006414);; Bi…	--	[J]	Translation, ribosomal structure and biogenesis	Elongation factor Tu GTP binding domain;; Elongation factor Tu C-terminal domain;; Elongation factor Tu domain 2;; Elongation factor Tu domain 4;; 50S ribosome-binding GTPase	Elongation factor 1-alpha GN=eft-4 OS=Caenorhabditis elegans PE=3 SV=1	eukaryotic translation elongation factor 1A [Trichuris trichiura]
c35184.graph_c0	3.56037	0.423829	0.00493254	2.51804	up
c35355.graph_c0	0.157668	1.97073	0.000609532	-3.11531	down
c35395.graph_c0	0.0592677	1.58038	4.08861e-05	-3.70752	down
c35699.graph_c0	1.32058	7.29026	8.71353e-05	-2.43788	down
c35770.graph_c0	2.39442	0	4.92426e-11	5.20323	up	--	--	--	--	--	--	Rubber elongation factor protein (REF)	--	--
c35779.graph_c0	0	1.20815	7.75685e-08	-4.79626	down	--	--	--	--	--	--	Caulimovirus DNA-binding protein	--	--
c35899.graph_c0	2.02776	0	0	5.95255	up	[RTKL]	--	Cellular Component: chromosome, centromeric region (GO:0000775);; Molecular Function: protein serine/threonine kinase activity (GO:0004674);; Molecular Function: ATP binding (GO:0005524);; Cellular Component: nucleus (GO:0005634);; Cellular Component: cytoplasm (GO:0005737);; Cellular Component: microtubule organizing center (GO:0005815);; Cellular Component: spindle (GO:0005819);; Biological Pro…	K11481|0.0|dre:445246|aurka, zgc:100912	[D]	Cell cycle control, cell division, chromosome partitioning	Protein kinase domain;; Protein tyrosine kinase;; Kinase-like	Aurora kinase {ECO:0000312|EMBL:BAJ10384.1} OS=Patiria pectinifera (Starfish) PE=1 SV=1	PREDICTED: aurora kinase A isoform X1 [Saccoglossus kowalevskii]
c35908.graph_c0	2.19073	0.0214765	1.11022e-16	5.21302	up	--	--	--	--	[T]	Signal transduction mechanisms	Low-density lipoprotein receptor repeat class B	Low-density lipoprotein receptor-related protein (Precursor) GN=lrp-1 OS=Caenorhabditis elegans PE=1 SV=1	hypothetical protein BRAFLDRAFT_227282 [Branchiostoma floridae]
c36008.graph_c0	2.42234	0	6.75238e-12	5.31136	up	--	--	--	--	--	--	RTP801 C-terminal region	Protein charybde GN=chrb OS=Drosophila melanogaster (Fruit fly) PE=2 SV=2	Protein charybde [Zootermopsis nevadensis]
c36032.graph_c0	35.5378	0.73248	0	5.16364	up	--	--	Molecular Function: ATP binding (GO:0005524);; Cellular Component: cytoplasm (GO:0005737);; Cellular Component: cytoskeleton (GO:0005856);;	--	[Z]	Cytoskeleton	Actin	Actin (Fragment) OS=Spodoptera littoralis (Egyptian cotton leafworm) PE=2 SV=1	beta actin [Ixodes ricinus]
c36062.graph_c0	1.61087	0	1.56741e-12	5.38745	up	--	--	--	--	--	--	Zona pellucida-like domain;; Trefoil (P-type) domain	--	predicted protein [Nematostella vectensis]
c36336.graph_c0	10.792	0.26685	0	4.97806	up	[R]	General function prediction only	--	--	[R]	General function prediction only	RNA recognition motif. (a.k.a. RRM, RBD, or RNP domain);; RNA recognition motif (a.k.a. RRM, RBD, or RNP domain);; RNA recognition motif. (a.k.a. RRM, RBD, or RNP domain)	RNA-binding protein squid GN=sqd OS=Drosophila melanogaster (Fruit fly) PE=1 SV=3	hypothetical protein BRAFLDRAFT_71461 [Branchiostoma floridae]
c36385.graph_c0	0.293196	1.1605	0.000786062	-2.02835	down	--	--	--	--	--	--	von Willebrand factor type C domain	Dorsal-ventral patterning protein Sog GN=sog OS=Drosophila melanogaster (Fruit fly) PE=1 SV=1	PREDICTED: chordin-like protein 1-like [Strongylocentrotus purpuratus]
c36510.graph_c0	1.34245	0	2.5609e-08	4.81961	up	--	--	--	--	--	--	Glycosyl hydrolases family 17	--	PREDICTED: glucan endo-1,3-beta-glucosidase-like [Hydra vulgaris]
c36716.graph_c0	1.82655	0.0123743	0	5.73892	up	--	--	--	--	--	--	Topoisomerase II-associated protein PAT1	--	hypothetical protein BRAFLDRAFT_119484 [Branchiostoma floridae]
c36751.graph_c0	1.60544	0	1.81298e-11	5.25831	up	[G]	Carbohydrate transport and metabolism	Biological Process: carbohydrate metabolic process (GO:0005975);; Molecular Function: glycogen phosphorylase activity (GO:0008184);; Molecular Function: pyridoxal phosphate binding (GO:0030170);;	K00688|0.0|xtr:779523|pygl	[G]	Carbohydrate transport and metabolism	Carbohydrate phosphorylase	Glycogen phosphorylase GN=GlyP OS=Drosophila melanogaster (Fruit fly) PE=2 SV=2	glycogen phosphorylase [Marsupenaeus japonicus]
c36783.graph_c0	0.328712	3.92605	8.65628e-06	-3.24141	down	[R]	General function prediction only	Molecular Function: GTPase activity (GO:0003924);; Molecular Function: GTP binding (GO:0005525);; Cellular Component: Golgi stack (GO:0005795);; Biological Process: protein ADP-ribosylation (GO:0006471);; Biological Process: post-Golgi vesicle-mediated transport (GO:0006892);; Biological Process: cell adhesion (GO:0007155);; Biological Process: neurotransmitter secretion (GO:0007269);; Biological…	K07977|1e-113|nve:NEMVE_v1g242285|hypothetical protein	[U]	Intracellular trafficking, secretion, and vesicular transport	ADP-ribosylation factor family;; Signal recognition particle receptor beta subunit;; Ras family;; Gtr1/RagA G protein conserved region;; Miro-like protein;; 50S ribosome-binding GTPase	ADP-ribosylation factor 1 GN=ARF1 OS=Locusta migratoria (Migratory locust) PE=2 SV=2	hypothetical protein HELRODRAFT_186077 [Helobdella robusta]
c36795.graph_c0	1.94754	0.0352795	1.11022e-16	4.83889	up	--	--	--	--	[W]	Extracellular structures	--	--	PREDICTED: protein brambleberry-like [Saccoglossus kowalevskii]
c36810.graph_c0	11.3534	0	1.4938e-08	4.85578	up
c36836.graph_c0	2.7157	0	9.10383e-15	5.63643	up	[R]	General function prediction only	--	--	--	--	RNA recognition motif. (a.k.a. RRM, RBD, or RNP domain);; RNA recognition motif (a.k.a. RRM, RBD, or RNP domain);; RNA recognition motif. (a.k.a. RRM, RBD, or RNP domain);; RNA binding motif	Poly(U)-binding-splicing factor half pint GN=pUf68 OS=Drosophila melanogaster (Fruit fly) PE=1 SV=2	PREDICTED: RNA-binding protein 45-like [Hydra vulgaris]
c37014.graph_c0	4.15191	0.062904	6.42398e-11	4.59764	up	[R]	General function prediction only	--	--	[R]	General function prediction only	--	Polycomb protein PHO GN=pho OS=Drosophila melanogaster (Fruit fly) PE=1 SV=2	predicted protein [Nematostella vectensis]
c37143.graph_c0	0	1.79018	1.67533e-13	-5.56086	down	[P]	Inorganic ion transport and metabolism	Molecular Function: oxidoreductase activity (GO:0016491);;	K13253|1e-12|tca:655549|similar to CG6713-PA, isoform A	[C]	Energy production and conversion	Oxidoreductase NAD-binding domain;; FAD binding domain;; Oxidoreductase FAD-binding domain;; Oxidoreductase NAD-binding domain	Nitric oxide synthase-like protein OS=Bombyx mori (Silk moth) PE=2 SV=1	ferredoxin-NADP oxidoreductase [Bigelowiella natans]
c37251.graph_c0	6.47278	0	6.83519e-06	4.39717	up
c37259.graph_c0	1.92995	0	2.98355e-11	5.23103	up	[O]	Posttranslational modification, protein turnover, chaperones	Molecular Function: ATP binding (GO:0005524);; Cellular Component: endoplasmic reticulum lumen (GO:0005788);; Biological Process: response to stress (GO:0006950);; Molecular Function: 2-alkenal reductase [NAD(P)] activity (GO:0032440);; Biological Process: oxidation-reduction process (GO:0055114);;	K09490|0.0|dre:378848|hspa5, cb865, fb60h09, fi36d04, wu:fb60h09, wu:fi36d04, zgc:55994, zgc:77606	[O]	Posttranslational modification, protein turnover, chaperones	Hsp70 protein;; NAD-specific glutamate dehydrogenase	78 kDa glucose-regulated protein (Precursor) OS=Aplysia californica (California sea hare) PE=1 SV=1	78 kDa glucose-regulated protein [Conus novaehollandiae]
c37291.graph_c0	2.70362	0	0	6.37011	up	[D]	Cell cycle control, cell division, chromosome partitioning	Biological Process: mitotic cell cycle (GO:0000278);; Biological Process: cell cycle process (GO:0022402);; Biological Process: regulation of cell cycle (GO:0051726);;	K06627|0.0|dre:192295|ccna2, CycA2, cb671, chunp6924, wu:fi36f03	[D]	Cell cycle control, cell division, chromosome partitioning	Cyclin, N-terminal domain;; Cyclin, C-terminal domain	G2/mitotic-specific cyclin-A OS=Patella vulgata (Common limpet) PE=2 SV=1	hypothetical protein BRAFLDRAFT_69715 [Branchiostoma floridae]
c37308.graph_c0	9.66311	0	0	7.06961	up	--	--	--	K11514|2e-29|dre:100151622|cdca9, Borealin-2, Dasra-A	[AR]	--	Nbl1 / Borealin N terminal	--	hypothetical protein ENH_00034000, partial [Eimeria necatrix]
c37373.graph_c0	3.15133	0.0656489	1.13243e-14	4.64048	up	[UR]	--	--	--	[U]	Intracellular trafficking, secretion, and vesicular transport	PX domain	--	predicted protein [Nematostella vectensis]
c37620.graph_c0	4.03389	0.081488	0	5.01901	up	[U]	Intracellular trafficking, secretion, and vesicular transport	Biological Process: protein transport (GO:0015031);; Cellular Component: intracellular part (GO:0044424);;	--	[U]	Intracellular trafficking, secretion, and vesicular transport	Armadillo/beta-catenin-like repeat;; Importin beta binding domain;; HEAT repeats;; HEAT-like repeat;; HEAT repeat;; Armadillo-like	Importin subunit alpha GN=Pen OS=Drosophila melanogaster (Fruit fly) PE=1 SV=2	PREDICTED: importin subunit alpha-2-like [Strongylocentrotus purpuratus]
c37678.graph_c0	5.22603	0.119856	0	4.71696	up	--	--	--	K10402|7e-89|dre:406257|Surhe, wu:fi04h04, wu:fi19d09, zgc:77087	--	--	--	Titin GN=CG1915 OS=Drosophila melanogaster (Fruit fly) PE=1 SV=3	Kinesin-like protein KIF20A [Crassostrea gigas]
c37737.graph_c0	11.7694	1.78313	0.000318621	2.35577	up
c37832.graph_c0	32.9012	0.404765	0	6.04508	up	[Z]	Cytoskeleton	Molecular Function: ATP binding (GO:0005524);; Cellular Component: cytoplasm (GO:0005737);; Cellular Component: cytoskeleton (GO:0005856);;	K05692|1e-161|xtr:407952|actb, MGC76228, MGC79692, MGC88999, beta-actin, ps1tp5bp1	[Z]	Cytoskeleton	Actin	Actin-5C (Precursor) GN=Act5C OS=Anopheles gambiae (African malaria mosquito) PE=2 SV=1	actin [Hypochilus thorelli]
c37901.graph_c0	2.84298	0	2.17049e-06	4.49214	up	[I]	Lipid transport and metabolism	Molecular Function: 3-hydroxyacyl-CoA dehydrogenase activity (GO:0003857);; Molecular Function: enoyl-CoA hydratase activity (GO:0004300);; Biological Process: fatty acid beta-oxidation (GO:0006635);; Cellular Component: mitochondrial fatty acid beta-oxidation multienzyme complex (GO:0016507);; Molecular Function: coenzyme binding (GO:0050662);;	K07515|1e-140|dre:793834|im:7144234	[I]	Lipid transport and metabolism	3-hydroxyacyl-CoA dehydrogenase, C-terminal domain	Probable 3-hydroxyacyl-CoA dehydrogenase B0272.3 GN=B0272.3 OS=Caenorhabditis elegans PE=1 SV=1	hypothetical protein LOTGIDRAFT_112349, partial [Lottia gigantea]
c37955.graph_c0	1.18026	0.0894084	0.000126778	3.03456	up	--	--	--	--	[R]	General function prediction only	Protein of unknown function (DUF2370)	--	hypothetical protein LOTGIDRAFT_230882 [Lottia gigantea]
c38019.graph_c0	1.74476	0.0484628	2.1098e-05	3.7526	up
c38022.graph_c0	0.359946	3.49927	0.000276935	-2.95545	down
c38053.graph_c0	2.10733	0.0666838	1.47882e-13	4.25947	up	[R]	General function prediction only	--	K03363|0.0|dre:406353|cdc20, wu:fe49f10, zgc:63536	[DO]	--	WD domain, G-beta repeat;; Eukaryotic translation initiation factor eIF2A	Anaphase-promoting complex subunit cdc20 GN=cdc20 OS=Dictyostelium discoideum (Slime mold) PE=1 SV=1	PREDICTED: cell division cycle protein 20 homolog [Saccoglossus kowalevskii]
c38162.graph_c0	3.4657	0	6.66134e-16	5.75607	up	[J]	Translation, ribosomal structure and biogenesis	Molecular Function: exonuclease activity (GO:0004527);;	--	[R]	General function prediction only	--	Cuticle collagen 2 (Precursor) GN=col-2 OS=Caenorhabditis elegans PE=2 SV=1	hypothetical protein BRAFLDRAFT_156042 [Branchiostoma floridae]
c38442.graph_c0	83.944	14.0366	0	2.40566	up
c38663.graph_c0	6.62982	0	0	5.90156	up	[J]	Translation, ribosomal structure and biogenesis	Molecular Function: structural constituent of ribosome (GO:0003735);; Cellular Component: ribosome (GO:0005840);; Biological Process: translation (GO:0006412);;	K02877|1e-130|mdo:100024612|similar to ribosomal protein L15	[J]	Translation, ribosomal structure and biogenesis	Ribosomal L15	60S ribosomal protein L15 GN=RPL15 OS=Hydra vulgaris (Hydra) PE=2 SV=2	RecName: Full=60S ribosomal protein L15 [Hydra vulgaris]
c38928.graph_c0	2.0591	0.0256092	2.55906e-13	4.87596	up	[G]	Carbohydrate transport and metabolism	Molecular Function: kinase activity (GO:0016301);; Biological Process: cellular metabolic process (GO:0044237);; Molecular Function: metal ion binding (GO:0046872);;	K00873|1e-110|dre:335817|pkm2a, cb1029, fj33f03, pkm2, wu:fj33f03	[G]	Carbohydrate transport and metabolism	Pyruvate kinase, alpha/beta domain;; Pyruvate kinase, barrel domain	Pyruvate kinase GN=PyK OS=Drosophila melanogaster (Fruit fly) PE=2 SV=2	PREDICTED: pyruvate kinase PKM [Ciona intestinalis]
c39023.graph_c0	4.90304	0	0	6.33211	up	[P]	Inorganic ion transport and metabolism	Molecular Function: superoxide dismutase activity (GO:0004784);; Biological Process: superoxide metabolic process (GO:0006801);; Molecular Function: metal ion binding (GO:0046872);; Biological Process: oxidation-reduction process (GO:0055114);;	K04564|1e-144|dre:335799|sod2, cb463, wu:fj33b01, zgc:73051	[P]	Inorganic ion transport and metabolism	Iron/manganese superoxide dismutases, C-terminal domain;; Iron/manganese superoxide dismutases, alpha-hairpin domain	Superoxide dismutase [Mn] 1, mitochondrial (Precursor) GN=sod-2 OS=Caenorhabditis elegans PE=1 SV=1	hypothetical protein BRAFLDRAFT_113999 [Branchiostoma floridae]
c39307.graph_c0	1.74886	0.0809609	5.86523e-06	3.51839	up	--	--	--	--	--	--	--	--	hypothetical protein [Cotesia congregata]
c39317.graph_c0	1.90569	0	1.10485e-11	5.28508	up
c39362.graph_c0	3.65977	0	0	6.40714	up	--	--	--	--	--	--	Zona pellucida-like domain	--	predicted protein [Nematostella vectensis]
c39378.graph_c0	3.59994	0.0624954	1.89901e-09	4.40643	up	[J]	Translation, ribosomal structure and biogenesis	Molecular Function: structural constituent of ribosome (GO:0003735);; Cellular Component: ribosome (GO:0005840);; Biological Process: translation (GO:0006412);;	K02873|1e-127|dre:378961|rpl13, zgc:92272	[J]	Translation, ribosomal structure and biogenesis	Ribosomal protein L13e	60S ribosomal protein L13 GN=RpL13 OS=Spodoptera frugiperda (Fall armyworm) PE=2 SV=1	hypothetical protein BRAFLDRAFT_279721 [Branchiostoma floridae]
c39388.graph_c0	3.26262	0.194192	0.000354944	3.17111	up	[S]	Function unknown	--	--	[C]	Energy production and conversion	--	60S ribosomal protein L22 GN=RpL22 OS=Drosophila melanogaster (Fruit fly) PE=1 SV=2	GH10507 [Drosophila grimshawi]
c39464.graph_c0	2.82691	0	0	6.15477	up	--	--	--	K06087|1e-113|dre:60635|cldn7b, cb388, claudin7, cldn7, wu:fd19f08	--	--	PMP-22/EMP/MP20/Claudin family;; PMP-22/EMP/MP20/Claudin tight junction	--	PREDICTED: claudin-7-like [Ciona intestinalis]
c39643.graph_c0	1.55296	0	8.74304e-09	4.89106	up	--	--	--	--	[O]	Posttranslational modification, protein turnover, chaperones	Tubulin binding cofactor C	Tubulin-specific chaperone C GN=tbcc OS=Dictyostelium discoideum (Slime mold) PE=3 SV=1	hypothetical protein CAPTEDRAFT_191128 [Capitella teleta]
c39892.graph_c0	0	2.96074	3.4052e-07	-4.68799	down
c39951.graph_c0	8.98523	0.29555	5.0171e-13	4.2046	up	[J]	Translation, ribosomal structure and biogenesis	Molecular Function: structural constituent of ribosome (GO:0003735);; Cellular Component: ribosome (GO:0005840);; Biological Process: translation (GO:0006412);;	K02962|7e-84|xtr:100145026|rps17	[J]	Translation, ribosomal structure and biogenesis	Ribosomal S17	40S ribosomal protein S17 GN=RpS17 OS=Drosophila melanogaster (Fruit fly) PE=1 SV=2	ribosomal protein S17 [Branchiostoma belcheri]
c3997.graph_c0	0.883749	0	2.18657e-05	4.29552	up	--	--	--	--	[K]	Transcription	Fork head domain	Fork head domain-containing protein FD2 GN=fd64A OS=Drosophila melanogaster (Fruit fly) PE=2 SV=2	Silk gland factor 1 [Harpegnathos saltator]
c39999.graph_c0	6.63067	0.123469	0	5.13555	up	[J]	Translation, ribosomal structure and biogenesis	Molecular Function: structural constituent of ribosome (GO:0003735);; Molecular Function: DNA-(apurinic or apyrimidinic site) lyase activity (GO:0003906);; Cellular Component: ribosome (GO:0005840);; Biological Process: translational elongation (GO:0006414);; Biological Process: ribosome biogenesis (GO:0042254);;	K02941|0.0|mdo:100014381|similar to 60S acidic ribosomal protein P0 (L10E)	[J]	Translation, ribosomal structure and biogenesis	Ribosomal protein L10;; 60s Acidic ribosomal protein	60S acidic ribosomal protein P0 GN=RpLP0 OS=Drosophila melanogaster (Fruit fly) PE=1 SV=1	PREDICTED: 60S acidic ribosomal protein P0 [Ciona intestinalis]
c40000.graph_c0	2.2764	0.155909	2.89298e-10	3.40975	up	[L]	Replication, recombination and repair	Molecular Function: DNA binding (GO:0003677);; Cellular Component: nucleus (GO:0005634);; Biological Process: regulation of DNA replication (GO:0006275);; Molecular Function: DNA polymerase processivity factor activity (GO:0030337);; Cellular Component: PCNA complex (GO:0043626);;	K04802|1e-165|dre:30678|pcna, cb16, fb36g03, wu:fa28e03, wu:fb36g03	[L]	Replication, recombination and repair	Proliferating cell nuclear antigen, C-terminal domain;; Proliferating cell nuclear antigen, N-terminal domain;; Repair protein Rad1/Rec1/Rad17;; Rad9	Proliferating cell nuclear antigen GN=PCNA OS=Styela clava (Sea squirt) PE=2 SV=1	hypothetical protein BRAFLDRAFT_115812 [Branchiostoma floridae]
c40044.graph_c0	10.2221	0.083509	0	5.47216	up	[J]	Translation, ribosomal structure and biogenesis	Biological Process: translation (GO:0006412);;	--	[K]	Transcription	EF-1 guanine nucleotide exchange domain;; Eukaryotic elongation factor 1 beta central acidic region	Probable elongation factor 1-beta GN=Ef1beta OS=Drosophila melanogaster (Fruit fly) PE=1 SV=3	hypothetical protein BRAFLDRAFT_198650 [Branchiostoma floridae]
c40353.graph_c0	2.73401	0	5.77316e-15	5.65707	up	[IQR]	--	Molecular Function: catalytic activity (GO:0003824);; Biological Process: metabolic process (GO:0008152);;	K11147|1e-46|api:100164938|similar to CG10672 CG10672-PA	[R]	General function prediction only	short chain dehydrogenase;; Enoyl-(Acyl carrier protein) reductase;; KR domain	Dehydrogenase/reductase SDR family member 4 {ECO:0000250|UniProtKB:Q9BTZ2} OS=Caenorhabditis elegans PE=1 SV=1	cinnamyl-alcohol dehydrogenase family/CAD family [Salpingoeca rosetta]
c40536.graph_c0	1.5502	0	1.22009e-05	4.34724	up	[O]	Posttranslational modification, protein turnover, chaperones	Biological Process: protein peptidyl-prolyl isomerization (GO:0000413);; Molecular Function: peptidyl-prolyl cis-trans isomerase activity (GO:0003755);; Biological Process: protein folding (GO:0006457);;	K01802|1e-101|bmy:Bm1_55850|cyclophilin-type peptidyl-prolyl cis-trans isomerase-2, Bmcyp-2	[O]	Posttranslational modification, protein turnover, chaperones	Cyclophilin type peptidyl-prolyl cis-trans isomerase/CLD	Peptidyl-prolyl cis-trans isomerase 3 GN=cyn-3 OS=Caenorhabditis elegans PE=1 SV=1	Peptidyl-prolyl cis-trans isomerase 3 [Toxocara canis]
c40623.graph_c0	3.92372	0.0195783	0	6.17584	up	[C]	Energy production and conversion	Molecular Function: ATP binding (GO:0005524);; Biological Process: ATP synthesis coupled proton transport (GO:0015986);; Biological Process: ATP hydrolysis coupled proton transport (GO:0015991);; Cellular Component: proton-transporting ATP synthase complex, catalytic core F(1) (GO:0045261);; Molecular Function: proton-transporting ATP synthase activity, rotational mechanism (GO:0046933);;	K02133|0.0|dre:554135|ATP5B, im:6793121, wu:fj38d01	[C]	Energy production and conversion	ATP synthase alpha/beta family, nucleotide-binding domain;; ATP synthase alpha/beta chain, C terminal domain;; ATP synthase alpha/beta family, beta-barrel domain	ATP synthase subunit beta, mitochondrial (Precursor) GN=ATPsyn-beta OS=Drosophila melanogaster (Fruit fly) PE=1 SV=3	PREDICTED: ATP synthase subunit beta, mitochondrial-like [Megachile rotundata]
c40807.graph_c0	0	1.47631	1.71917e-10	-5.18946	down	[P]	Inorganic ion transport and metabolism	Molecular Function: binding (GO:0005488);; Molecular Function: ATPase activity (GO:0016887);;	K01537|1e-42|phu:Phum_PHUM449030|calcium-transporting ATPase type 2C member, putative (EC:3.6.3.8)	[P]	Inorganic ion transport and metabolism	haloacid dehalogenase-like hydrolase;; haloacid dehalogenase-like hydrolase;; Putative hydrolase of sodium-potassium ATPase alpha subunit;; haloacid dehalogenase-like hydrolase	Probable plasma membrane ATPase GN=patB OS=Dictyostelium discoideum (Slime mold) PE=2 SV=2	plasmamembrane proton-efflux P-type ATPase [Acanthamoeba castellanii str. Neff]
c40840.graph_c0	9.09541	0.0611215	0	5.75048	up
c40875.graph_c0	14.1112	0.127258	0	6.25536	up	[D]	Cell cycle control, cell division, chromosome partitioning	Biological Process: regulation of cell cycle (GO:0051726);;	K05868|1e-159|dre:368316|ccnb2, sb:cb303	[D]	Cell cycle control, cell division, chromosome partitioning	Cyclin, N-terminal domain;; Cyclin, C-terminal domain	G2/mitotic-specific cyclin-B OS=Patella vulgata (Common limpet) PE=2 SV=1	hypothetical protein CAPTEDRAFT_151793 [Capitella teleta]
c41156.graph_c0	0.611435	2.60411	0.00241963	-2.0936	down	--	--	--	--	[WV]	--	C8 domain	Hemocytin (Precursor) OS=Bombyx mori (Silk moth) PE=2 SV=1	PREDICTED: BMP-binding endothelial regulator protein-like [Strongylocentrotus purpuratus]
c41160.graph_c0	0.245006	4.15125	5.07983e-09	-3.73152	down	[H]	Coenzyme transport and metabolism	Molecular Function: adenosylhomocysteinase activity (GO:0004013);; Biological Process: one-carbon metabolic process (GO:0006730);;	K01251|2e-73|aag:AaeL_AAEL008341|adenosylhomocysteinase	[H]	Coenzyme transport and metabolism	S-adenosyl-L-homocysteine hydrolase, NAD binding domain;; S-adenosyl-L-homocysteine hydrolase	Adenosylhomocysteinase OS=Trichomonas vaginalis PE=3 SV=1	adenosylhomocysteinase 1 [Fonticula alba]
c41499.graph_c0	2.79064	0	0	6.81792	up	--	--	Molecular Function: ATP binding (GO:0005524);; Biological Process: ATP catabolic process (GO:0006200);; Molecular Function: polyamine-transporting ATPase activity (GO:0015417);; Molecular Function: heme-transporting ATPase activity (GO:0015439);;	K06185|0.0|dre:336770|abcf2, fc74f03, fd58d07, wu:fb04f06, wu:fc74f03, wu:fd58d07	[R]	General function prediction only	ABC transporter;; ABC transporter;; AAA domain;; P-loop containing region of AAA domain;; AAA domain;; Miro-like protein	ABC transporter F family member 2 GN=abcF2 OS=Dictyostelium discoideum (Slime mold) PE=3 SV=1	PREDICTED: ATP-binding cassette sub-family F member 2 [Acromyrmex echinatior]
c41501.graph_c0	4.85869	0.0325195	0	6.26167	up	[Q]	Secondary metabolites biosynthesis, transport and catabolism	--	K09516|0.0|dre:677660|retsatl, wu:fi35b01, zgc:123334	[H]	Coenzyme transport and metabolism	NAD(P)-binding Rossmann-like domain;; FAD binding domain;; Flavin containing amine oxidoreductase;; FAD dependent oxidoreductase;; FAD dependent oxidoreductase;; GDP dissociation inhibitor;; Pyridine nucleotide-disulphide oxidoreductase;; HI0933-like protein;; Thi4 family;; FAD binding domain;; Glucose inhibited division protein A	--	hypothetical protein BRAFLDRAFT_119025 [Branchiostoma floridae]
c41622.graph_c0	0.793148	23.6042	0	-4.92747	down	--	--	--	--	--	--	Chlorophyll A-B binding protein	--	light-harvesting complex protein LHCG11 [Bigelowiella natans]
c41622.graph_c1	0	7.63454	6.99285e-09	-4.9604	down	--	--	Cellular Component: chloroplast (GO:0009507);; Biological Process: photosynthesis, light harvesting (GO:0009765);; Cellular Component: membrane (GO:0016020);;	--	--	--	Chlorophyll A-B binding protein	--	light harvesting complex protein LHCII-3 [Gymnochlora stellata]
c41630.graph_c0	1.07606	0	3.93446e-05	4.24187	up	[J]	Translation, ribosomal structure and biogenesis	Cellular Component: intracellular (GO:0005622);;	--	[J]	Translation, ribosomal structure and biogenesis	Ribosomal protein L3;; Ribosomal protein S10p/S20e	50S ribosomal protein L3, organellar chromatophore GN=rpl3 OS=Paulinella chromatophora PE=3 SV=1	Ribosomal S10 and Ribosomal L3 domain containing protein [Trichuris trichiura]
c41788.graph_c0	0	3.48602	7.32747e-14	-5.60122	down	--	--	--	--	--	--	Chlorophyll A-B binding protein	--	light-harvesting complex protein LHCG11 [Bigelowiella natans]
c41804.graph_c0	21.8583	127.613	0	-2.69982	down	--	--	--	--	--	--	--	--	tumor differentially expressed protein [Haplopelma schmidti]
c42038.graph_c0	1.85987	0	2.17049e-06	4.49214	up	--	--	--	--	--	--	Trypsin and protease inhibitor	--	--
c42057.graph_c0	7.12762	0	8.1514e-11	5.17488	up
c42140.graph_c0	2.86798	0.0955937	0.000329727	3.50233	up
c42149.graph_c0	0.313373	5.61428	2.6793e-12	-3.92124	down
c42190.graph_c0	4.09417	0.767612	0.00357818	2.07821	up
c42249.graph_c0	3.25876	0	3.02513e-09	4.95913	up	[J]	Translation, ribosomal structure and biogenesis	Biological Process: pseudouridine synthesis (GO:0001522);; Molecular Function: RNA binding (GO:0003723);; Molecular Function: 3',5'-cyclic-nucleotide phosphodiesterase activity (GO:0004114);; Biological Process: RNA processing (GO:0006396);; Biological Process: signal transduction (GO:0007165);; Molecular Function: pseudouridine synthase activity (GO:0009982);; Cellular Component: ribonucleoprote…	K11131|0.0|dre:613144|dkc1, MGC110395, fv62a07, wu:fa28f10, wu:fc87a02, wu:fi24a05, wu:fv62a07, zgc:110395	[J]	Translation, ribosomal structure and biogenesis	TruB family pseudouridylate synthase (N terminal domain);; PUA domain	H/ACA ribonucleoprotein complex subunit 4 GN=Nop60B OS=Drosophila melanogaster (Fruit fly) PE=1 SV=1	PREDICTED: H/ACA ribonucleoprotein complex subunit 4 isoform X2 [Ciona intestinalis]
c42280.graph_c0	1.46239	0.0974868	0.00170266	3.01581	up
c42297.graph_c0	2.62549	0.0260451	1.11022e-16	5.19622	up	[L]	Replication, recombination and repair	Molecular Function: nuclease activity (GO:0004518);; Molecular Function: lyase activity (GO:0016829);; Biological Process: nucleic acid metabolic process (GO:0090304);;	K10771|0.0|dre:406730|apex1, MGC113976, hm:zehn1532, wu:fc13d11, zgc:66204	[L]	Replication, recombination and repair	Endonuclease/Exonuclease/phosphatase family;; Endonuclease-reverse transcriptase	Recombination repair protein 1 GN=Rrp1 OS=Drosophila melanogaster (Fruit fly) PE=1 SV=2	hypothetical protein BRAFLDRAFT_225146 [Branchiostoma floridae]
c42333.graph_c0	2.31747	0	1.22009e-05	4.34724	up
c42501.graph_c0	1.74878	0.0393847	1.36779e-13	4.53001	up	--	--	--	--	--	--	Cardiac transcription factor regulator, Developmental protein	--	--
c42574.graph_c0	0.940011	8.1267	6.21725e-15	-3.16913	down
c42633.graph_c0	6.1537	0	3.02513e-09	4.95913	up	[M]	Cell wall/membrane/envelope biogenesis	Biological Process: reproduction (GO:0000003);; Biological Process: nematode larval development (GO:0002119);; Biological Process: embryo development ending in birth or egg hatching (GO:0009792);; Molecular Function: transferase activity, transferring glycosyl groups (GO:0016757);; Biological Process: growth (GO:0040007);; Cellular Component: striated muscle dense body (GO:0055120);;	K00750|4e-52|dre:415152|gygl, zgc:86679	[G]	Carbohydrate transport and metabolism	Glycosyl transferase family 8	Glycogenin-1 {ECO:0000312|WormBase:F56B6.4a} OS=Caenorhabditis elegans PE=1 SV=1	PREDICTED: glycogenin-1 isoform X2 [Ciona intestinalis]
c42633.graph_c1	5.26187	0.0996508	4.44089e-16	4.77574	up	--	--	Molecular Function: transferase activity (GO:0016740);;	K00750|1e-127|dre:406831|gyg1, fc13d04, fi23f07, gyg, wu:fc13d04, wu:fi23f07, zgc:55385, zgc:85619	[G]	Carbohydrate transport and metabolism	Glycosyl transferase family 8;; Nucleotide-diphospho-sugar transferase	Glycogenin-1 {ECO:0000312|WormBase:F56B6.4a} OS=Caenorhabditis elegans PE=1 SV=1	Glycogenin-1, partial [Stegodyphus mimosarum]
c42922.graph_c0	0	1.01794	1.0732e-09	-5.07947	down	--	--	Biological Process: cellular nitrogen compound biosynthetic process (GO:0044271);; Biological Process: organonitrogen compound biosynthetic process (GO:1901566);;	K01611|7e-52|phu:Phum_PHUM473090|S-adenosylmethionine decarboxylase, putative (EC:4.1.1.50)	[T]	Signal transduction mechanisms	Adenosylmethionine decarboxylase;; S-adenosyl-l-methionine decarboxylase leader peptide	S-adenosylmethionine decarboxylase beta chain (Precursor) GN=amd1 OS=Dictyostelium discoideum (Slime mold) PE=3 SV=3	adenosylmethionine decarboxylase 1 isoform 2 [Salpingoeca rosetta]
c42966.graph_c0	2.62856	0	1.4938e-08	4.85578	up
c43012.graph_c0	0	1.09437	7.1433e-06	-4.44352	down	[Q]	Secondary metabolites biosynthesis, transport and catabolism	--	K07437|5e-28|bfo:BRAFLDRAFT_87630|hypothetical protein	[QI]	--	Cytochrome P450	Probable cytochrome P450 524A1 GN=cyp524A1 OS=Dictyostelium discoideum (Slime mold) PE=3 SV=1	Cytochrome P450 26A1 [Crassostrea gigas]
c43538.graph_c0	11.6214	0	0	7.20894	up	--	--	--	--	--	--	Rubber elongation factor protein (REF)	--	--
c43579.graph_c0	0.546573	4.70633	0.00160932	-2.78797	down
c43587.graph_c0	16.2984	159.035	0	-3.43756	down	--	--	--	--	--	--	--	--	hypothetical protein CAPTEDRAFT_60885, partial [Capitella teleta]
c43641.graph_c0	0.200339	1.25205	0.00822324	-2.44711	down	--	--	--	--	[I]	Lipid transport and metabolism	Phospholipase A2	Phospholipase A2 AP-PLA2-I (Precursor) OS=Acanthaster planci (Crown-of-thorns starfish) PE=1 SV=1	PREDICTED: phospholipase A2 AP-PLA2-II-like [Strongylocentrotus purpuratus]
c43685.graph_c0	1.61481	0	2.29034e-07	4.66515	up	--	--	Biological Process: metabolic process (GO:0008152);;	--	--	--	--	Enolase-phosphatase E1 GN=CPIJ009638 OS=Culex quinquefasciatus (Southern house mosquito) PE=3 SV=1	aggregate spider glue 1 [Nephila clavipes]
c43765.graph_c0	9.68666	0.381343	0	4.19706	up	[O]	Posttranslational modification, protein turnover, chaperones	Biological Process: protein peptidyl-prolyl isomerization (GO:0000413);; Molecular Function: peptidyl-prolyl cis-trans isomerase activity (GO:0003755);; Cellular Component: cytoplasm (GO:0005737);; Biological Process: protein folding (GO:0006457);; Molecular Function: peptide binding (GO:0042277);;	--	[O]	Posttranslational modification, protein turnover, chaperones	Cyclophilin type peptidyl-prolyl cis-trans isomerase/CLD	Peptidyl-prolyl cis-trans isomerase OS=Hemicentrotus pulcherrimus (Sea urchin) PE=2 SV=1	cyclophilin A, putative [Ixodes scapularis]
c43766.graph_c0	4.42257	0.0491368	7.77156e-15	5.03555	up	--	--	--	--	[O]	Posttranslational modification, protein turnover, chaperones	Zinc finger C-x8-C-x5-C-x3-H type (and similar)	--	PREDICTED: probable E3 ubiquitin-protein ligase makorin-1-like [Metaseiulus occidentalis]
c43805.graph_c0	2.8648	0	7.60475e-08	4.74445	up	--	--	Cellular Component: lipid particle (GO:0005811);; Cellular Component: microtubule associated complex (GO:0005875);; Molecular Function: peptidase activity (GO:0008233);;	--	[O]	Posttranslational modification, protein turnover, chaperones	--	--	26,29 kDa proteinase-like cysteine protease [Plautia stali]
c43864.graph_c0	5.37006	0.419512	0.000206731	2.992	up
c43880.graph_c0	1.88773	0	2.29034e-07	4.66515	up
c43946.graph_c0	2.13162	0	6.83519e-06	4.39717	up	--	--	--	--	--	--	ABA/WDS induced protein	Knob-associated histidine-rich protein (Precursor; Fragment) OS=Plasmodium falciparum PE=2 SV=1	PREDICTED: histidine-rich glycoprotein-like [Harpegnathos saltator]
c43956.graph_c0	2.28049	0.0161042	0	5.67974	up	--	--	--	--	--	--	--	--	hypothetical protein BRAFLDRAFT_124451 [Branchiostoma floridae]
c43983.graph_c0	1.63755	0.0293451	1.11022e-16	4.85425	up	--	--	--	K13885|0.0|dre:387260|scarb1, cb1015	[T]	Signal transduction mechanisms	CD36 family	Protein croquemort GN=crq OS=Drosophila melanogaster (Fruit fly) PE=1 SV=2	hypothetical protein BRAFLDRAFT_126670 [Branchiostoma floridae]
c44017.graph_c0	0.185398	2.31735	3.69131e-06	-3.30485	down	--	--	--	--	[PD]	--	--	Secreted acidic protein 2 {ECO:0000303|PubMed:23765379} (Fragment) OS=Acropora millepora (Staghorn coral) PE=1 SV=1	hypothetical protein [Monosiga brevicollis MX1]
c44050.graph_c0	0.371546	3.15796	5.78804e-06	-2.93888	down	--	--	--	--	--	--	--	Ctenidin-1 {ECO:0000303|PubMed:20369272} (Precursor) OS=Cupiennius salei (American wandering spider) PE=1 SV=1	Histone-like transcription factor [Plasmodium knowlesi strain H]
c44051.graph_c0	1.5203	0.0436842	3.63594e-05	3.7059	up	[O]	Posttranslational modification, protein turnover, chaperones	Molecular Function: ATP binding (GO:0005524);; Biological Process: response to stress (GO:0006950);; Molecular Function: 2-alkenal reductase [NAD(P)] activity (GO:0032440);; Biological Process: oxidation-reduction process (GO:0055114);;	--	[O]	Posttranslational modification, protein turnover, chaperones	NAD-specific glutamate dehydrogenase;; Hsp70 protein	Heat shock 70 kDa protein cognate 4 OS=Manduca sexta (Tobacco hawkmoth) PE=2 SV=1	heat shock cognate protein 70, partial [Latrodectus hesperus]
c44089.graph_c0	8.4013	134.198	0	-4.13359	down	--	--	--	--	--	--	--	--	senescence associated protein [Echinococcus multilocularis]
c44119.graph_c0	0.242121	6.75882	6.52645e-11	-4.23623	down	--	--	Cellular Component: chloroplast (GO:0009507);; Biological Process: photosynthesis, light harvesting (GO:0009765);; Cellular Component: membrane (GO:0016020);;	--	--	--	Chlorophyll A-B binding protein	--	light harvesting complex protein LHCII-1 [Gymnochlora stellata]
c44173.graph_c0	0	2.17556	7.1433e-06	-4.44352	down	--	--	--	--	--	--	Extensin-like region	Circumsporozoite protein (Precursor) OS=Plasmodium berghei (strain Anka) PE=3 SV=1	hypothetical protein L798_03304 [Zootermopsis nevadensis]
c44179.graph_c0	18.9999	0.545941	6.21725e-15	4.39633	up
c44206.graph_c0	1.12172	0.160237	0.00180136	2.37828	up
c44222.graph_c0	2.15872	0	6.75238e-12	5.31136	up	[G]	Carbohydrate transport and metabolism	--	--	[G]	Carbohydrate transport and metabolism	Major intrinsic protein	Aquaporin AQPAe.a GN=AAEL003512 OS=Aedes aegypti (Yellowfever mosquito) PE=2 SV=2	PREDICTED: aquaporin TIP1-3-like [Saccoglossus kowalevskii]
c44226.graph_c0	0	18.1235	0	-6.27311	down
c44378.graph_c0	2.91458	0.313377	0.00121645	2.65824	up
c44406.graph_c0	140.138	0.990553	0	6.90247	up	--	--	--	K13171|6e-08|cfa:478185|SRRM1	[A]	RNA processing and modification	--	--	hypothetical protein CAEBREN_00989 [Caenorhabditis brenneri]
c44491.graph_c0	3.1156	0.0379005	0	5.40626	up	[J]	Translation, ribosomal structure and biogenesis	--	--	[L]	Replication, recombination and repair	DNA repair metallo-beta-lactamase;; Beta-lactamase superfamily domain	DNA cross-link repair 1 protein GN=dclre1 OS=Dictyostelium discoideum (Slime mold) PE=3 SV=1	hypothetical protein BRAFLDRAFT_287105 [Branchiostoma floridae]
c44573.graph_c0	0.0523141	1.61292	4.17777e-12	-4.37662	down	[G]	Carbohydrate transport and metabolism	Molecular Function: magnesium ion binding (GO:0000287);; Molecular Function: monooxygenase activity (GO:0004497);; Cellular Component: chloroplast (GO:0009507);; Molecular Function: ribulose-bisphosphate carboxylase activity (GO:0016984);; Biological Process: reductive pentose-phosphate cycle (GO:0019253);; Biological Process: oxidation-reduction process (GO:0055114);;	--	--	--	Ribulose bisphosphate carboxylase large chain, catalytic domain;; Ribulose bisphosphate carboxylase large chain, N-terminal domain	Ribulose bisphosphate carboxylase large chain {ECO:0000255|HAMAP-Rule:MF_01338} GN=PCC_0908 OS=Paulinella chromatophora PE=3 SV=1	ribulose-1,5-bisphosphate carboxylase/oxygenase large subunit [Lotharella sp. CCMP622]
c44636.graph_c0	2.78002	0	1.06045e-09	5.02414	up	[R]	General function prediction only	Molecular Function: sphingomyelin phosphodiesterase activity (GO:0004767);; Molecular Function: GTP binding (GO:0005525);; Biological Process: small GTPase mediated signal transduction (GO:0007264);; Biological Process: protein transport (GO:0015031);;	--	[R]	General function prediction only	Ras family;; Miro-like protein;; ADP-ribosylation factor family;; 50S ribosome-binding GTPase;; Ferrous iron transport protein B;; Gtr1/RagA G protein conserved region;; Elongation factor Tu GTP binding domain	Ras-related protein Rab-1A GN=rab1A OS=Dictyostelium discoideum (Slime mold) PE=2 SV=2	hypothetical protein CAPTEDRAFT_21277 [Capitella teleta]
c44700.graph_c0	144.936	13.0187	0	3.30786	up	--	--	--	--	[TV]	--	Lectin C-type domain	Perlucin-like protein {ECO:0000303|PubMed:21643827} (Precursor) OS=Mytilus galloprovincialis (Mediterranean mussel) PE=1 SV=1	hypothetical protein BRAFLDRAFT_177822 [Branchiostoma floridae]
c44904.graph_c1	5.18053	0	3.84426e-06	4.44544	up	--	--	--	--	--	--	Dehydrin	--	hypothetical protein PFFVO_01052 [Plasmodium falciparum Vietnam Oak-Knoll (FVO)]
c44998.graph_c0	4.86725	0	0	6.80872	up	--	--	--	--	--	--	--	--	hypothetical protein BRAFLDRAFT_118688 [Branchiostoma floridae]
c4500.graph_c0	1.17973	0	1.22009e-05	4.34724	up
c45048.graph_c0	1.7654	0	3.99625e-07	4.6238	up	--	--	--	--	--	--	Rubber elongation factor protein (REF)	--	--
c45050.graph_c0	21.5656	0	0	8.62137	up	--	--	--	K05120|9e-22|gga:424562|TIE1	[T]	Signal transduction mechanisms	--	Cell death abnormality protein 1 {ECO:0000250|UniProtKB:Q9XWD6} (Precursor) OS=Caenorhabditis briggsae PE=3 SV=2	PREDICTED: uncharacterized protein LOC102801023, partial [Saccoglossus kowalevskii]
c45081.graph_c0	5.90628	0.666469	5.26186e-10	2.84668	up
c45159.graph_c0	3.62331	0	0	6.40714	up	[P]	Inorganic ion transport and metabolism	--	K07232|1e-111|xtr:100170505|chac1	[P]	Inorganic ion transport and metabolism	ChaC-like protein	--	predicted protein [Nematostella vectensis]
c45202.graph_c0	2.61161	0.0494594	1.39299e-08	4.2846	up	--	--	Molecular Function: protein binding (GO:0005515);; Biological Process: G-protein coupled receptor signaling pathway (GO:0007186);; Molecular Function: guanyl nucleotide binding (GO:0019001);; Molecular Function: ion binding (GO:0043167);;	--	[DT]	--	G-protein alpha subunit;; ADP-ribosylation factor family	Guanine nucleotide-binding protein G(o) subunit alpha OS=Geodia cydonium (Sponge) PE=2 SV=3	G protein subunit alpha v, partial [Terebratalia transversa]
c45219.graph_c0	0	1.21164	1.26625e-07	-4.76106	down	[MG]	--	Molecular Function: catalytic activity (GO:0003824);; Biological Process: metabolic process (GO:0008152);;	--	[V]	Defense mechanisms	NAD dependent epimerase/dehydratase family;; 3-beta hydroxysteroid dehydrogenase/isomerase family;; NADH(P)-binding;; Male sterility protein;; NmrA-like family;; short chain dehydrogenase;; KR domain	Sterol-4-alpha-carboxylate 3-dehydrogenase, decarboxylating GN=nsdhl OS=Dictyostelium discoideum (Slime mold) PE=3 SV=1	hypothetical protein PTSG_12676 [Salpingoeca rosetta]
c45637.graph_c0	31.8602	0.24582	0	5.55354	up
c45789.graph_c0	3.40352	0.0238328	0	5.69177	up	[LKJ]	--	Molecular Function: nucleic acid binding (GO:0003676);; Molecular Function: ATP binding (GO:0005524);; Molecular Function: ATP-dependent helicase activity (GO:0008026);;	K13182|0.0|dre:406249|ddx39b, ddx39, wu:fc16a02, zgc:55433, zgc:85646	[A]	RNA processing and modification	DEAD/DEAH box helicase;; Helicase conserved C-terminal domain	ATP-dependent RNA helicase WM6 GN=Hel25E OS=Drosophila melanogaster (Fruit fly) PE=1 SV=1	PREDICTED: spliceosome RNA helicase DDX39B isoform X1 [Saccoglossus kowalevskii]
c45804.graph_c0	0.0271227	12.7695	0	-7.78763	down	--	--	--	--	[O]	Posttranslational modification, protein turnover, chaperones	ATPase family associated with various cellular activities (AAA)	--	--
c45813.graph_c0	5.17804	0	0	6.54642	up
c45852.graph_c0	1.43432	0.203438	9.78681e-05	2.44809	up	--	--	--	--	--	--	Domain of unknown function (DUF4214)	Uncharacterized protein DDB_G0271670 (Precursor) GN=DDB_G0271670 OS=Dictyostelium discoideum (Slime mold) PE=3 SV=1	hypothetical protein EHI8A_016610 [Entamoeba histolytica HM-1:IMSS-B]
c46007.graph_c0	3.03834	0.0973769	0.000189235	3.55598	up	[J]	Translation, ribosomal structure and biogenesis	Biological Process: mitotic spindle elongation (GO:0000022);; Molecular Function: structural constituent of ribosome (GO:0003735);; Biological Process: translation (GO:0006412);; Cellular Component: cytosolic small ribosomal subunit (GO:0022627);;	--	[J]	Translation, ribosomal structure and biogenesis	Ribosomal protein S8	40S ribosomal protein S15a GN=RpS15Aa OS=Drosophila yakuba (Fruit fly) PE=2 SV=3	hypothetical protein DAPPUDRAFT_302797 [Daphnia pulex]
c46050.graph_c0	1.26028	0.210034	0.00462429	2.19756	up	[J]	Translation, ribosomal structure and biogenesis	Molecular Function: translation elongation factor activity (GO:0003746);; Molecular Function: GTPase activity (GO:0003924);; Molecular Function: GTP binding (GO:0005525);; Cellular Component: mitochondrion (GO:0005739);; Biological Process: GTP catabolic process (GO:0006184);; Biological Process: translational elongation (GO:0006414);; Cellular Component: chloroplast (GO:0009507);; Molecular Func…	--	[J]	Translation, ribosomal structure and biogenesis	Elongation factor Tu GTP binding domain;; Elongation factor Tu C-terminal domain;; Elongation factor Tu domain 2	Elongation factor Tu, mitochondrial GN=TUFA OS=Reclinomonas americana PE=3 SV=1	PREDICTED: elongation factor Tu-like [Amphimedon queenslandica]
c46078.graph_c0	0.180102	1.1706	0.000648944	-2.56443	down	[J]	Translation, ribosomal structure and biogenesis	Cellular Component: plastid (GO:0009536);; Cellular Component: ribonucleoprotein complex (GO:0030529);;	--	[J]	Translation, ribosomal structure and biogenesis	Ribosomal Proteins L2, C-terminal domain;; Ribosomal Proteins L2, RNA binding domain;; Ribosomal protein L23	60S ribosomal protein L2, mitochondrial GN=RPL2 OS=Reclinomonas americana PE=3 SV=2	50S ribosomal protein L2, chloroplastic [Trichuris trichiura]
c46125.graph_c0	5.98826	0.0997985	0	4.95746	up	[P]	Inorganic ion transport and metabolism	Molecular Function: superoxide dismutase activity (GO:0004784);; Biological Process: superoxide metabolic process (GO:0006801);; Molecular Function: metal ion binding (GO:0046872);; Biological Process: oxidation-reduction process (GO:0055114);;	K04565|3e-90|dre:30553|sod1, Cu/Zn-SOD, ZSOD, cuzn	[P]	Inorganic ion transport and metabolism	Copper/zinc superoxide dismutase (SODC)	Superoxide dismutase [Cu-Zn] GN=Sod OS=Drosophila pseudoobscura pseudoobscura (Fruit fly) PE=3 SV=3	Cu/Zn super oxide dismutase [Crassostrea madrasensis]
c46212.graph_c0	6.96251	0.0707531	0	5.66338	up	[G]	Carbohydrate transport and metabolism	Biological Process: achiasmate meiosis I (GO:0000705);; Cellular Component: condensed nuclear chromosome outer kinetochore (GO:0000942);; Biological Process: response to hypoxia (GO:0001666);; Molecular Function: fructose-bisphosphate aldolase activity (GO:0004332);; Molecular Function: protein kinase activity (GO:0004672);; Cellular Component: centrosome (GO:0005813);; Cellular Component: spindl…	K01623|0.0|dre:321664|aldob, fb25f09, wu:fb25f09	[G]	Carbohydrate transport and metabolism	Fructose-bisphosphate aldolase class-I	Fructose-bisphosphate aldolase GN=Ald OS=Drosophila melanogaster (Fruit fly) PE=1 SV=5	aldolase class-1 protein [Apostichopus japonicus]
c46228.graph_c0	5.47437	0.380143	1.23188e-08	3.33931	up
c46322.graph_c0	0.277465	1.57992	0.00088595	-2.42438	down
c46471.graph_c0	2.08603	0.011745	0	6.00313	up	[RTKL]	--	--	K08862|0.0|dre:334202|plk3, cnk, wu:fi35f10	[D]	Cell cycle control, cell division, chromosome partitioning	Protein kinase domain;; Protein tyrosine kinase;; POLO box duplicated region;; Kinase-like	Serine/threonine-protein kinase plk-2 GN=plk-2 OS=Caenorhabditis elegans PE=2 SV=1	PREDICTED: LOW QUALITY PROTEIN: serine/threonine-protein kinase PLK2-like [Strongylocentrotus purpuratus]
c46569.graph_c0	7.04287	0.0548479	0	6.04445	up	--	--	--	--	--	--	Perilipin family	Spore coat protein SP96 GN=cotA OS=Dictyostelium discoideum (Slime mold) PE=4 SV=2	PREDICTED: lipid storage droplets surface-binding protein 2-like [Solenopsis invicta]
c46636.graph_c0	7.00878	0.0207103	0	6.92681	up	--	--	--	--	--	--	Zona pellucida-like domain	ZP domain-containing protein {ECO:0000303|PubMed:23765379} (Precursor) OS=Acropora millepora (Staghorn coral) PE=1 SV=1	predicted protein [Nematostella vectensis]
c46728.graph_c0	2.75614	0	1.4938e-08	4.85578	up	--	--	--	--	--	--	Probable lipid transfer;; Protease inhibitor/seed storage/LTP family	--	--
c46746.graph_c0	2.40629	0	2.17049e-06	4.49214	up	--	--	--	--	[P]	Inorganic ion transport and metabolism	Metallothionein	Copper-specific metallothionein-2 OS=Callinectes sapidus (Blue crab) PE=3 SV=1	--
c47081.graph_c0	2.44256	0	1.10485e-11	5.28508	up
c47137.graph_c0	2.94245	0	1.22009e-05	4.34724	up	--	--	--	--	--	--	Gamma-thionin family	--	hypothetical protein CRE_14278 [Caenorhabditis remanei]
c47180.graph_c0	6.26622	0.0617934	0	5.70635	up
c47213.graph_c0	3.07452	0.0283089	0	5.80454	up	[I]	Lipid transport and metabolism	Molecular Function: biotin carboxylase activity (GO:0004075);; Molecular Function: ATP binding (GO:0005524);; Cellular Component: mitochondrion (GO:0005739);; Biological Process: metabolic process (GO:0008152);; Molecular Function: metal ion binding (GO:0046872);;	K01965|0.0|dre:437019|pcca, wu:fb92g02, zgc:100925	[IE]	--	Carbamoyl-phosphate synthase L chain, ATP binding domain;; Carbamoyl-phosphate synthase L chain, N-terminal domain;; Biotin carboxylase C-terminal domain;; Biotin-requiring enzyme;; ATP-grasp domain;; D-ala D-ala ligase C-terminus;; Biotin-lipoyl like;; ATP-grasp domain;; RimK-like ATP-grasp domain;; ATP-grasp domain	Propionyl-CoA carboxylase alpha chain, mitochondrial (Precursor) GN=pcca-1 OS=Caenorhabditis briggsae PE=3 SV=1	hypothetical protein BRAFLDRAFT_275721 [Branchiostoma floridae]
c47234.graph_c0	6.81218	0.0741056	0	5.98571	up
c47553.graph_c0	1.56666	6.52736	7.7267e-05	-2.11712	down
c47614.graph_c0	0.187249	9.04982	2.78668e-10	-4.53637	down	--	--	--	--	--	--	--	--	unnamed protein product [Oikopleura dioica]
c47729.graph_c0	0	3.04458	1.19999e-05	-4.39842	down	--	--	--	--	--	--	Glycine rich protein family	Holotricin-3 (Precursor) OS=Holotrichia diomphalia (Korean black chafer) PE=1 SV=2	Hypothetical protein CBG22624 [Caenorhabditis briggsae]
c47751.graph_c0	8.21524	0.0329117	0	6.49022	up	--	--	--	K01046|7e-93|dre:393096|lipg, MGC55345, zgc:55345	--	--	PLAT/LH2 domain;; Lipase	--	hypothetical protein BRAFLDRAFT_103255 [Branchiostoma floridae]
c47800.graph_c0	3.05259	0.481236	0.00205247	2.27474	up
c47889.graph_c0	0.124182	1.65566	0.000240024	-3.20414	down	[O]	Posttranslational modification, protein turnover, chaperones	Molecular Function: ATP binding (GO:0005524);; Biological Process: protein folding (GO:0006457);; Biological Process: response to stress (GO:0006950);; Molecular Function: unfolded protein binding (GO:0051082);;	K04079|1e-111|mdo:100024025|similar to HSP90AA1 protein	[O]	Posttranslational modification, protein turnover, chaperones	Hsp90 protein	Heat shock cognate 90 kDa protein GN=hspD OS=Dictyostelium discoideum (Slime mold) PE=1 SV=2	predicted protein [Naegleria gruberi]
c47910.graph_c0	2.76666	13.7685	7.8797e-12	-2.43518	down
c47995.graph_c0	12.0852	0.0844479	0	6.5426	up	[J]	Translation, ribosomal structure and biogenesis	Biological Process: nematode larval development (GO:0002119);; Molecular Function: translation elongation factor activity (GO:0003746);; Molecular Function: GTPase activity (GO:0003924);; Molecular Function: GTP binding (GO:0005525);; Biological Process: GTP catabolic process (GO:0006184);; Biological Process: translational elongation (GO:0006414);; Biological Process: apoptotic process (GO:00069…	K03234|0.0|oaa:100085359|similar to eukaryotic translation elongation factor 2	[J]	Translation, ribosomal structure and biogenesis	Elongation factor Tu GTP binding domain;; Elongation factor G, domain IV;; Elongation factor G C-terminus;; Elongation Factor G, domain II;; Elongation factor Tu domain 2;; 50S ribosome-binding GTPase	Elongation factor 2 GN=eef-2 OS=Caenorhabditis elegans PE=1 SV=4	PREDICTED: elongation factor 2-like [Saccoglossus kowalevskii]
c48008.graph_c0	7.73495	0.987604	5.1266e-11	2.71148	up
c48059.graph_c0	1.00454	0.0558046	0.000125775	3.26608	up	--	--	--	--	--	--	Integrase core domain	--	proteophosphoglycan ppg1 [Leishmania mexicana MHOM/GT/2001/U1103]
c48073.graph_c0	3.79531	0	0	6.09551	up
c48134.graph_c0	1.9933	0	7.60475e-08	4.74445	up	--	--	--	--	[R]	General function prediction only	Galactose oxidase, central domain;; Galactose oxidase, central domain;; Kelch motif;; Kelch motif;; Kelch motif;; Kelch motif	Rho GTPase-activating protein gacHH GN=gacHH OS=Dictyostelium discoideum (Slime mold) PE=3 SV=1	hypothetical protein CAPTEDRAFT_93513 [Capitella teleta]
c48134.graph_c1	4.52596	0	2.54341e-12	5.36253	up	--	--	--	--	--	--	--	--	PREDICTED: acyl-CoA-binding domain-containing protein 4-like [Saccoglossus kowalevskii]
c48142.graph_c0	4.28104	0	2.22045e-16	5.81236	up	--	--	--	--	[DZ]	--	Translationally controlled tumour protein	Translationally-controlled tumor protein homolog 1 GN=DDB_G0282853 OS=Dictyostelium discoideum (Slime mold) PE=3 SV=1	hypothetical protein DDB_G0282853 [Dictyostelium discoideum AX4]
c48186.graph_c0	0.485922	10.3657	0	-4.24155	down
c48390.graph_c0	1.75959	7.80556	9.26899e-10	-2.268	down
c48447.graph_c0	0.339863	6.23047	1.03458e-06	-3.64592	down	--	--	--	--	--	--	--	--	hypothetical protein CRE_03576 [Caenorhabditis remanei]
c48476.graph_c0	4.23443	0.779016	7.26258e-06	2.18198	up	--	--	--	--	--	--	Lecithin retinol acyltransferase	--	--
c48532.graph_c0	0	3.80373	2.07332e-07	-4.72499	down	--	--	--	--	--	--	--	Merozoite surface protein CMZ-8 (Fragment) OS=Eimeria acervulina (Coccidian parasite) PE=2 SV=1	PREDICTED: leucine-rich repeat extensin-like protein 3 [Nasonia vitripennis]
c48550.graph_c0	1.73982	0.336552	0.000281506	2.08376	up	[RTKL]	--	Molecular Function: transferase activity (GO:0016740);;	K05129|7e-31|ame:408312|Nrk	[T]	Signal transduction mechanisms	Protein tyrosine kinase;; Protein kinase domain	Tyrosine kinase receptor Cad96Ca (Precursor) GN=Cad96Ca OS=Drosophila melanogaster (Fruit fly) PE=2 SV=2	hypothetical protein CAOG_02460 [Capsaspora owczarzaki ATCC 30864]
c48656.graph_c0	3.88246	0.588218	6.24321e-07	2.43734	up	--	--	--	--	--	--	--	--	PREDICTED: uncharacterized protein LOC575728 [Strongylocentrotus purpuratus]
c48740.graph_c0	0.241734	2.7395	9.29713e-09	-3.34362	down	--	--	Molecular Function: transporter activity (GO:0005215);; Cellular Component: mitochondrial inner membrane (GO:0005743);; Cellular Component: integral component of membrane (GO:0016021);; Biological Process: transmembrane transport (GO:0055085);;	K05863|1e-136|nve:NEMVE_v1g246069|hypothetical protein	[C]	Energy production and conversion	Mitochondrial carrier protein	ADP,ATP carrier protein 1 GN=AGAP006782 OS=Anopheles gambiae (African malaria mosquito) PE=2 SV=2	adenine nucleotide translocator, putative [Acanthamoeba castellanii str. Neff]
c48829.graph_c0	1.46017	0.0380231	1.03186e-11	4.32472	up	--	--	Molecular Function: DNA binding (GO:0003677);;	--	[R]	General function prediction only	Homeobox domain;; Homeodomain leucine-zipper encoding, Homez	Pituitary homeobox homolog Ptx1 GN=Ptx1 OS=Drosophila melanogaster (Fruit fly) PE=2 SV=2	vent homeobox 2 [Branchiostoma floridae]
c48879.graph_c0	9.00488	1.38956	4.18369e-07	2.4189	up
c48888.graph_c0	0.0619489	2.40898	0	-4.91048	down	--	--	--	--	[R]	General function prediction only	BTB/POZ domain;; BTB/POZ domain;; BTB/POZ domain	Uncharacterized protein F47D12.3 GN=F47D12.3 OS=Caenorhabditis elegans PE=4 SV=1	PREDICTED: uncharacterized protein LOC576395 [Strongylocentrotus purpuratus]
c48889.graph_c1	0.839206	4.89508	0.000606184	-2.45794	down
c48946.graph_c0	221.986	1.53721	0	6.89506	up
c48985.graph_c0	34.815	3.7353	0	2.99405	up
c49161.graph_c0	0.808261	0	3.84426e-06	4.44544	up	--	--	--	--	[R]	General function prediction only	YT521-B-like domain	--	hypothetical protein CAPTEDRAFT_19575 [Capitella teleta]
c49321.graph_c0	6.24208	0.0293866	0	6.25907	up	[R]	General function prediction only	--	--	[R]	General function prediction only	Zinc finger, C2H2 type;; C2H2-type zinc finger;; Zinc-finger double domain	Protein suppressor of hairy wing GN=su(Hw) OS=Drosophila melanogaster (Fruit fly) PE=1 SV=2	hypothetical protein BRAFLDRAFT_283312 [Branchiostoma floridae]
c49333.graph_c0	9.08611	0.0904038	0	6.03455	up	--	--	--	K04011|1e-51|ptr:449643|CR1	--	--	Sushi domain (SCR repeat)	Protein lev-9 (Precursor) GN=lev-9 OS=Caenorhabditis elegans PE=1 SV=3	PREDICTED: CUB and sushi domain-containing protein 1-like [Amphimedon queenslandica]
c49417.graph_c0	6.48077	0.989373	5.55144e-10	2.47488	up
c49431.graph_c0	41.6073	207.696	0	-2.48133	down	--	--	--	--	--	--	--	--	hypothetical protein CAPTEDRAFT_143211, partial [Capitella teleta]
c49482.graph_c0	66.3835	0.473412	0	6.91292	up	--	--	--	--	--	--	Zona pellucida-like domain	ZP domain-containing protein {ECO:0000303|PubMed:23765379} (Precursor) OS=Acropora millepora (Staghorn coral) PE=1 SV=1	predicted protein [Nematostella vectensis]
c49560.graph_c0	1.14759	0.0775354	1.81837e-05	3.19328	up	[RTKL]	--	--	K08886|7e-14|dre:559119|Ack-like	[T]	Signal transduction mechanisms	Protein tyrosine kinase;; Protein kinase domain	Tyrosine-protein kinase sid-3 GN=sid-3 OS=Caenorhabditis elegans PE=1 SV=2	protein tyrosine kinase, partial [Ephydatia fluviatilis]
c49634.graph_c0	0.0529489	1.50013	1.54599e-05	-3.79119	down
c49638.graph_c0	7.03203	0	1.78821e-09	4.992	up	--	--	Molecular Function: binding (GO:0005488);;	--	--	--	--	Formin-A GN=forA OS=Dictyostelium discoideum (Slime mold) PE=1 SV=1	hypothetical protein IscW_ISCW018444 [Ixodes scapularis]
c49648.graph_c0	2.08725	0	2.17049e-06	4.49214	up
c49735.graph_c0	0.183966	0.919778	0.00016298	-2.31819	down	--	--	Molecular Function: transferase activity, transferring phosphorus-containing groups (GO:0016772);; Biological Process: primary metabolic process (GO:0044238);; Biological Process: cellular macromolecule metabolic process (GO:0044260);; Molecular Function: organic cyclic compound binding (GO:0097159);; Molecular Function: heterocyclic compound binding (GO:1901363);;	--	[R]	General function prediction only	--	RNA-directed DNA polymerase from mobile element jockey GN=pol OS=Drosophila melanogaster (Fruit fly) PE=1 SV=1	hypothetical protein TcasGA2_TC002166 [Tribolium castaneum]
c49786.graph_c0	20.4368	3.95825	1.05577e-09	2.16493	up	--	--	--	--	--	--	--	--	hypothetical protein CLF_113308 [Clonorchis sinensis]
c49843.graph_c0	0.111954	0.96399	0.00160932	-2.78797	down	--	--	--	--	--	--	--	--	pol-like protein [Ciona intestinalis]
c49951.graph_c0	5.47619	0	1.45106e-13	5.50597	up	--	--	--	--	--	--	Hydrophobic seed protein;; Protease inhibitor/seed storage/LTP family	Uncharacterized proline-rich protein (Fragment) OS=Owenia fusiformis PE=4 SV=1	--
c50018.graph_c0	1.46679	29.1531	0	-4.40847	down	--	--	--	--	--	--	--	Histidine-rich glycoprotein (Precursor) OS=Plasmodium lophurae PE=4 SV=1	hypothetical protein LOTGIDRAFT_144349, partial [Lottia gigantea]
c50021.graph_c0	5.48326	0.589564	0.00121645	2.65824	up
c50127.graph_c0	0.257005	1.28495	0.000501273	-2.29904	down	--	--	--	--	--	--	Major Facilitator Superfamily	--	PREDICTED: monocarboxylate transporter 5-like [Strongylocentrotus purpuratus]
c50249.graph_c0	0	4.2945	1.26625e-07	-4.76106	down
c50253.graph_c0	2.88727	0.213859	1.90827e-06	3.17644	up
c50264.graph_c0	2.0683	0.19697	0.000188481	2.82621	up
c50343.graph_c0	4.54825	0.32028	6.31657e-10	3.37043	up
c50355.graph_c0	0	1.64569	1.81511e-08	-4.89697	down	[G]	Carbohydrate transport and metabolism	--	--	[G]	Carbohydrate transport and metabolism	Major intrinsic protein	Aquaporin AQPAn.G GN=AGAP008842 OS=Anopheles gambiae (African malaria mosquito) PE=3 SV=4	PREDICTED: aquaporin TIP1-3-like [Saccoglossus kowalevskii]
c50375.graph_c0	0.219052	2.92053	2.66631e-12	-3.62245	down
c50462.graph_c0	226.786	2.51091	0	6.30573	up
c50463.graph_c0	3.33002	0	1.78821e-09	4.992	up	[K]	Transcription	--	--	[K]	Transcription	Fork head domain	Protein fork head GN=fkh OS=Drosophila melanogaster (Fruit fly) PE=1 SV=1	hypothetical protein BRAFLDRAFT_247432 [Branchiostoma floridae]
c50496.graph_c0	1.84255	0.367154	0.00192201	2.0218	up
c50537.graph_c0	0.026157	1.13341	3.77433e-09	-4.383	down	[QR]	--	Biological Process: metabolic process (GO:0008152);; Molecular Function: transferase activity (GO:0016740);;	K00559|1e-32|cbr:CBG15658|Hypothetical protein CBG15658	[IR]	--	Sterol methyltransferase C-terminal;; Methyltransferase domain;; Methyltransferase domain;; Methyltransferase domain;; Methyltransferase domain;; Methyltransferase domain;; ubiE/COQ5 methyltransferase family;; Mycolic acid cyclopropane synthetase;; Methyltransferase domain	Probable cycloartenol-C-24-methyltransferase 1 GN=smt1 OS=Dictyostelium discoideum (Slime mold) PE=1 SV=1	hypothetical protein SAMD00019534_061020 [Acytostelium subglobosum LB1]
c50556.graph_c0	0.909212	0.0996885	0.000164763	2.6992	up	--	--	--	--	--	--	HECT-domain (ubiquitin-transferase)	--	hypothetical protein LOTGIDRAFT_153955 [Lottia gigantea]
c50617.graph_c0	0	1.41863	7.1433e-06	-4.44352	down	[G]	Carbohydrate transport and metabolism	Cellular Component: phosphopyruvate hydratase complex (GO:0000015);; Molecular Function: magnesium ion binding (GO:0000287);; Biological Process: nematode larval development (GO:0002119);; Molecular Function: phosphopyruvate hydratase activity (GO:0004634);; Biological Process: glycolysis (GO:0006096);; Biological Process: receptor-mediated endocytosis (GO:0006898);; Biological Process: determina…	K01689|1e-125|hmg:100215404|similar to enolase 3, (beta, muscle)	[G]	Carbohydrate transport and metabolism	Enolase, C-terminal TIM barrel domain;; Methylaspartate ammonia-lyase C-terminus	Enolase OS=Doryteuthis pealeii (Longfin inshore squid) PE=2 SV=1	PREDICTED: beta-enolase-like [Hydra vulgaris]
c50745.graph_c0	0.684389	5.13262	4.70735e-14	-2.98203	down	--	--	--	K01047|5e-28|spu:585809|similar to Phospholipase A2 precursor (Phosphatidylcholine 2-acylhydrolase) (Group IB phospholipase A2)	[I]	Lipid transport and metabolism	Phospholipase A2	Phospholipase A2 AP-PLA2-II (Precursor) OS=Acanthaster planci (Crown-of-thorns starfish) PE=1 SV=1	PREDICTED: phospholipase A2-like [Strongylocentrotus purpuratus]
c50749.graph_c0	2.68636	0.565775	8.71753e-06	2.01365	up	--	--	Molecular Function: ATP binding (GO:0005524);; Molecular Function: kinase activity (GO:0016301);; Biological Process: phosphorylation (GO:0016310);;	--	[C]	Energy production and conversion	ATP:guanido phosphotransferase, C-terminal catalytic domain;; ATP:guanido phosphotransferase, N-terminal domain	Creatine kinase, flagellar OS=Strongylocentrotus purpuratus (Purple sea urchin) PE=1 SV=1	predicted protein [Nematostella vectensis]
c50768.graph_c0	5.62684	1.09404	0.000159425	2.0847	up
c50806.graph_c0	2.22993	0	9.99201e-16	5.73681	up	--	--	--	--	--	--	PTB domain (IRS-1 type);; PH domain	Insulin receptor substrate 1 {ECO:0000250|UniProtKB:Q9XTN2} OS=Drosophila yakuba (Fruit fly) PE=3 SV=1	PREDICTED: insulin receptor substrate 1-like [Strongylocentrotus purpuratus]
c50932.graph_c0	0.206517	1.03252	0.00588237	-2.24378	down	--	--	--	--	--	--	Inter-alpha-trypsin inhibitor heavy chain C-terminus	--	PREDICTED: inter-alpha-trypsin inhibitor heavy chain H3-like [Strongylocentrotus purpuratus]
c50999.graph_c0	0	1.72838	1.37201e-12	-5.45472	down
c51095.graph_c0	1.75499	0.228501	0.0023711	2.46082	up
c51202.graph_c0	12.8916	0.092341	0	6.64258	up	[I]	Lipid transport and metabolism	Molecular Function: catalytic activity (GO:0003824);; Biological Process: metabolic process (GO:0008152);;	K01897|0.0|dre:447860|acsl5, zgc:92083	[I]	Lipid transport and metabolism	AMP-binding enzyme	Fatty acyl-CoA synthetase A GN=fcsA OS=Dictyostelium discoideum (Slime mold) PE=1 SV=1	hypothetical protein DAPPUDRAFT_211072 [Daphnia pulex]
c51221.graph_c0	1.42942	0.164292	0.0030948	2.5663	up
c51240.graph_c0	1.49733	6.86236	2.40669e-06	-2.26488	down
c51285.graph_c0	1.49187	29.8358	0	-4.3561	down
c51288.graph_c0	3.44876	0.0990965	3.63594e-05	3.7059	up	--	--	--	--	--	--	--	--	rRNA promoter binding protein [Echinococcus granulosus]
c51562.graph_c0	0.793318	7.05131	0.00103535	-2.8317	down
c51666.graph_c0	0.342072	2.81877	1.66578e-09	-3.02369	down	--	--	Biological Process: reproduction (GO:0000003);; Molecular Function: binding (GO:0005488);; Biological Process: anatomical structure morphogenesis (GO:0009653);; Biological Process: single-organism cellular process (GO:0044763);; Biological Process: single-organism developmental process (GO:0044767);; Biological Process: organ development (GO:0048513);;	--	[RP]	--	--	Muscle M-line assembly protein unc-89 GN=unc-89 OS=Caenorhabditis elegans PE=1 SV=3	axoneme-associated protein mst101 [Entamoeba dispar SAW760]
c51728.graph_c0	30.4322	235.479	0	-3.11405	down	--	--	--	--	--	--	--	--	hypothetical protein CAPTEDRAFT_143611, partial [Capitella teleta]
c51770.graph_c0	81.5665	0.948117	0	6.13489	up	--	--	--	--	--	--	Protein of unknown function (DUF1373)	--	--
c51837.graph_c0	338.673	41.15	0	2.8735	up	--	--	--	--	[TV]	--	Lectin C-type domain	Alpha-N-acetylgalactosamine-specific lectin {ECO:0000303|PubMed:11886841} (Precursor) OS=Patiria pectinifera (Starfish) PE=1 SV=1	PREDICTED: aggrecan core protein-like isoform 1 [Strongylocentrotus purpuratus]
c51856.graph_c0	7.34916	33.9247	2.22045e-16	-2.35878	down	--	--	--	--	[T]	Signal transduction mechanisms	HYR domain;; EGF-like domain	Fibropellin-1 (Precursor) GN=EGF1 OS=Strongylocentrotus purpuratus (Purple sea urchin) PE=1 SV=2	PREDICTED: uncharacterized protein LOC587453 [Strongylocentrotus purpuratus]
c52042.graph_c0	90.0283	0.664868	0	6.59859	up	--	--	--	--	[R]	General function prediction only	Fibrinogen beta and gamma chains, C-terminal globular domain	Fibrinogen-like protein A (Precursor) OS=Parastichopus parvimensis (Warty sea cucumber) PE=2 SV=1	PREDICTED: tenascin-like [Aplysia californica]
c52048.graph_c0	0.134084	0.960877	0.00013307	-2.70034	down	--	--	--	--	[GO]	--	Sulfotransferase domain	WSCD family member AAEL009094 GN=AAEL009094 OS=Aedes aegypti (Yellowfever mosquito) PE=3 SV=1	hypothetical protein BRAFLDRAFT_83094 [Branchiostoma floridae]
c52056.graph_c0	18.428	1.91318	0	3.05393	up
c52078.graph_c0	1.638	0.255922	0.000172963	2.33312	up	--	--	--	K13356|3e-27|bta:525262|FAR1, MGC139098, MLSTD2	[I]	Lipid transport and metabolism	Male sterility protein	Putative fatty acyl-CoA reductase CG5065 {ECO:0000250|UniProtKB:Q922J9, ECO:0000312|EMBL:AAF57974.1} GN=CG5065 OS=Drosophila melanogaster (Fruit fly) PE=3 SV=1	PREDICTED: fatty acyl-CoA reductase 1-like [Strongylocentrotus purpuratus]
c52092.graph_c0	0.318556	1.85814	7.89611e-06	-2.53503	down
c52137.graph_c0	9.47768	0.0135698	0	7.96847	up	--	--	--	--	--	--	Zona pellucida-like domain	--	--
c52162.graph_c0	3.04162	0	0	5.86654	up	--	--	--	--	[TV]	--	AIG1 family	Reticulocyte-binding protein 2 homolog a {ECO:0000312|EMBL:CAD52492.1} GN=PF13_0198 OS=Plasmodium falciparum (isolate 3D7) PE=3 SV=1	hypothetical protein EMH_0015390 [Eimeria mitis]
c52266.graph_c0	4.14902	0	9.99201e-16	5.73681	up	--	--	--	--	--	--	Thaumatin family	--	thaumatin-like protein 2 [Schistocerca gregaria]
c52317.graph_c0	3.6783	0.701643	5.3553e-06	2.14023	up
c52336.graph_c0	0	2.97277	7.1433e-06	-4.44352	down	--	--	--	--	--	--	--	--	nesprin, putative [Pediculus humanus corporis]
c52459.graph_c0	0	2.6317	7.75685e-08	-4.79626	down	--	--	--	--	[P]	Inorganic ion transport and metabolism	Metallothionein	Cadmium-metallothionein OS=Helix pomatia (Roman snail) PE=1 SV=1	hypothetical protein [Trichomonas vaginalis G3]
c52531.graph_c0	20.3684	0.173979	0	6.48719	up	--	--	--	--	--	--	Zona pellucida-like domain	Uncharacterized protein DDB_G0271670 (Precursor) GN=DDB_G0271670 OS=Dictyostelium discoideum (Slime mold) PE=3 SV=1	hypothetical protein TGVEG_223725 [Toxoplasma gondii VEG]
c52559.graph_c0	1.8847	0.209399	2.57789e-05	2.72851	up	[E]	Amino acid transport and metabolism	--	--	--	--	Aluminium induced protein;; Glutamine amidotransferase domain;; Glutamine amidotransferase domain	Probable asparagine synthetase [glutamine-hydrolyzing] GN=asns OS=Dictyostelium discoideum (Slime mold) PE=1 SV=1	asparagine synthetase [Polysphondylium pallidum PN500]
c52564.graph_c0	0.259888	1.79745	3.54488e-08	-2.79221	down
c52613.graph_c0	0	2.37236	1.11022e-16	-5.88895	down	[E]	Amino acid transport and metabolism	Molecular Function: glutamate-ammonia ligase activity (GO:0004356);; Cellular Component: cytoplasm (GO:0005737);; Biological Process: glutamate catabolic process (GO:0006538);; Biological Process: glutamine biosynthetic process (GO:0006542);; Biological Process: synapse assembly (GO:0007416);; Biological Process: neurotransmitter receptor metabolic process (GO:0045213);;	K01915|1e-148|dmo:Dmoj_GI15717|GI15717 gene product from transcript GI15717-RA	[E]	Amino acid transport and metabolism	Glutamine synthetase, catalytic domain;; Glutamine synthetase, beta-Grasp domain	Glutamine synthetase 2 cytoplasmic GN=Gs2 OS=Drosophila melanogaster (Fruit fly) PE=2 SV=3	glutamine synthetase [Acanthamoeba castellanii str. Neff]
c52620.graph_c0	3.74563	0.249694	0.00170266	3.01581	up	--	--	Molecular Function: GTPase activity (GO:0003924);; Molecular Function: structural constituent of cytoskeleton (GO:0005200);; Molecular Function: GTP binding (GO:0005525);; Cellular Component: cytoplasm (GO:0005737);; Cellular Component: microtubule (GO:0005874);; Biological Process: GTP catabolic process (GO:0006184);; Biological Process: microtubule-based process (GO:0007017);; Biological Proces…	--	[Z]	Cytoskeleton	Tubulin/FtsZ family, GTPase domain	Tubulin alpha-1 chain OS=Aplysia californica (California sea hare) PE=2 SV=1	alpha tubulin [Aplysia dactylomela]
c52646.graph_c0	1.92926	0.321524	0.00153478	2.22269	up
c52746.graph_c0	25.5781	0	0	7.7065	up	--	--	--	--	--	--	Dehydrin	--	hypothetical protein DDB_G0278433 [Dictyostelium discoideum AX4]
c52752.graph_c0	3.19794	0.283489	3.24591e-11	3.15134	up	--	--	--	--	--	--	--	--	PREDICTED: uncharacterized protein LOC100200197 [Hydra vulgaris]
c52839.graph_c0	0.323543	1.64213	1.50946e-05	-2.36797	down	--	--	--	--	[R]	General function prediction only	Reverse transcriptase (RNA-dependent DNA polymerase)	Probable RNA-directed DNA polymerase from transposon BS OS=Drosophila melanogaster (Fruit fly) PE=2 SV=1	PREDICTED: uncharacterized protein LOC587493 [Strongylocentrotus purpuratus]
c52866.graph_c0	0.408723	3.57612	5.59212e-05	-2.91286	down	--	--	Biological Process: single-multicellular organism process (GO:0044707);;	--	[T]	Signal transduction mechanisms	Fibronectin type III domain	--	PREDICTED: receptor-type tyrosine-protein phosphatase T-like [Strongylocentrotus purpuratus]
c52910.graph_c0	0.163065	0.996449	0.000283904	-2.5228	down	--	--	--	--	--	--	--	--	PREDICTED: uncharacterized protein LOC100891589 [Strongylocentrotus purpuratus]
c53008.graph_c0	1.76505	0	9.68559e-13	5.41194	up	[C]	Energy production and conversion	Molecular Function: oxidoreductase activity (GO:0016491);; Molecular Function: metal ion binding (GO:0046872);; Biological Process: oxidation-reduction process (GO:0055114);;	K00121|1e-151|dre:116517|adh5, ADH3	[Q]	Secondary metabolites biosynthesis, transport and catabolism	Zinc-binding dehydrogenase;; Alcohol dehydrogenase GroES-like domain	Alcohol dehydrogenase class-3 OS=Octopus vulgaris (Common octopus) PE=1 SV=1	hypothetical protein DAPPUDRAFT_230717 [Daphnia pulex]
c53063.graph_c0	4.73327	0.262944	0.000125775	3.26608	up
c53097.graph_c0	24.2158	3.00533	4.44089e-16	2.79372	up	--	--	--	--	--	--	--	--	PREDICTED: putative nuclease HARBI1-like [Strongylocentrotus purpuratus]
c53216.graph_c0	4.34513	0.278518	0.00100824	3.06946	up
c53278.graph_c0	0.351506	1.93317	0.00700538	-2.33306	down
c53489.graph_c0	8.10121	0.482187	0	3.75972	up	--	--	--	--	--	--	--	--	predicted protein [Nematostella vectensis]
c53526.graph_c0	6.72189	0.97413	1.4487e-06	2.48145	up
c53566.graph_c0	1.95585	0.255652	2.03534e-05	2.56267	up	[J]	Translation, ribosomal structure and biogenesis	Molecular Function: nucleotide binding (GO:0000166);; Molecular Function: hydrolase activity (GO:0016787);; Biological Process: cellular metabolic process (GO:0044237);; Biological Process: primary metabolic process (GO:0044238);; Biological Process: organic substance metabolic process (GO:0071704);;	--	[J]	Translation, ribosomal structure and biogenesis	Elongation factor Tu GTP binding domain;; Ribosomal protein S7p/S5e;; Ribosomal protein S12/S23	Elongation factor G, mitochondrial {ECO:0000255|HAMAP-Rule:MF_03061} (Precursor) GN=ico OS=Drosophila virilis (Fruit fly) PE=3 SV=1	hypothetical protein D910_00694, partial [Dendroctonus ponderosae]
c53701.graph_c0	6.08935	0.831831	3.56262e-06	2.53886	up	--	--	--	--	--	--	--	--	Cell wall-associated hydrolase [Trichuris trichiura]
c53741.graph_c0	1.82744	0.237934	0.0023711	2.46082	up
c53772.graph_c0	1.58683	6.54531	2.87826e-06	-2.13353	down
c53848.graph_c0	0.283669	1.37887	0.00856674	-2.20478	down
c53880.graph_c0	34.9503	301.249	0	-3.26933	down	--	--	--	--	--	--	--	--	hypothetical protein CAPTEDRAFT_61389, partial [Capitella teleta]
c53988.graph_c0	1.35192	0.22041	0.00036975	2.27348	up	[P]	Inorganic ion transport and metabolism	--	--	[P]	Inorganic ion transport and metabolism	Ammonium Transporter Family	Putative ammonium transporter 1 GN=amt-1 OS=Caenorhabditis elegans PE=3 SV=1	ammonium transporter-like protein [Saccoglossus kowalevskii]
c54029.graph_c0	3.28964	0.530557	0.00976589	2.21031	up
c54164.graph_c0	0	1.21731	2.55676e-06	-4.52969	down	--	--	Molecular Function: hydrolase activity (GO:0016787);;	K01373|2e-79|nve:NEMVE_v1g204928|hypothetical protein	[O]	Posttranslational modification, protein turnover, chaperones	Papain family cysteine protease;; Cathepsin propeptide inhibitor domain (I29)	Cysteine proteinase 1 (Precursor) GN=cprA OS=Dictyostelium discoideum (Slime mold) PE=1 SV=2	hypothetical protein SAMD00019534_071660 [Acytostelium subglobosum LB1]
c54209.graph_c0	0	3.09186	0	-5.98359	down	[H]	Coenzyme transport and metabolism	Molecular Function: methionine adenosyltransferase activity (GO:0004478);; Molecular Function: ATP binding (GO:0005524);; Biological Process: S-adenosylmethionine biosynthetic process (GO:0006556);; Biological Process: one-carbon metabolic process (GO:0006730);; Molecular Function: metal ion binding (GO:0046872);;	K00789|1e-135|ptr:459363|MAT2A	[H]	Coenzyme transport and metabolism	S-adenosylmethionine synthetase, C-terminal domain;; S-adenosylmethionine synthetase, central domain	S-adenosylmethionine synthase GN=metK OS=Dictyostelium discoideum (Slime mold) PE=1 SV=1	S-adenosylmethionine synthetase [Polysphondylium pallidum PN500]
c54237.graph_c0	0	2.23734	2.55676e-06	-4.52969	down	[Z]	Cytoskeleton	Molecular Function: GTPase activity (GO:0003924);; Molecular Function: structural constituent of cytoskeleton (GO:0005200);; Molecular Function: GTP binding (GO:0005525);; Cellular Component: cytoplasm (GO:0005737);; Cellular Component: microtubule (GO:0005874);; Biological Process: GTP catabolic process (GO:0006184);; Biological Process: microtubule-based process (GO:0007017);; Biological Proces…	--	[Z]	Cytoskeleton	Tubulin C-terminal domain;; Tubulin/FtsZ family, GTPase domain	Tubulin alpha chain OS=Oxytricha granulifera PE=3 SV=1	alpha-tubulin [Spirostomum sp.]
c54286.graph_c0	0	2.09542	6.98795e-11	-5.24146	down	[O]	Posttranslational modification, protein turnover, chaperones	--	K00799|1e-15|der:Dere_GG21881|GG21881 gene product from transcript GG21881-RA	[O]	Posttranslational modification, protein turnover, chaperones	Glutathione S-transferase, N-terminal domain;; Glutathione S-transferase, C-terminal domain;; Glutathione S-transferase, N-terminal domain;; Glutathione S-transferase, N-terminal domain;; Glutathione S-transferase, C-terminal domain	Glutathione S-transferase 1 GN=Gst1 OS=Musca domestica (House fly) PE=2 SV=1	glutathione S-transferase III homolog [Naegleria fowleri]
c54350.graph_c0	1.83363	0.158063	0.000902348	2.8562	up
c54411.graph_c0	0.22852	2.5945	9.11049e-13	-3.45769	down	[J]	Translation, ribosomal structure and biogenesis	Molecular Function: structural constituent of ribosome (GO:0003735);; Cellular Component: mitochondrion (GO:0005739);; Biological Process: translation (GO:0006412);; Cellular Component: chloroplast (GO:0009507);; Cellular Component: small ribosomal subunit (GO:0015935);; Molecular Function: rRNA binding (GO:0019843);; Cellular Component: nucleomorph (GO:0033009);;	--	[J]	Translation, ribosomal structure and biogenesis	Ribosomal protein S7p/S5e;; Ribosomal protein S12/S23	30S ribosomal protein S7, organellar chromatophore GN=rps7 OS=Paulinella chromatophora PE=3 SV=1	30S ribosomal protein S7 [Bigelowiella natans]
c54426.graph_c0	2.95522	0	0	6.46681	up	--	--	--	--	[O]	Posttranslational modification, protein turnover, chaperones	SPRY-associated domain;; zinc finger of C3HC4-type, RING;; Zinc finger, C3HC4 type (RING finger);; Zinc finger, C3HC4 type (RING finger);; Ring finger domain;; SPRY domain;; Zinc finger, C3HC4 type (RING finger);; B-box zinc finger	Uncharacterized RING finger protein T02C1.1 GN=T02C1.1 OS=Caenorhabditis elegans PE=3 SV=1	hypothetical protein BRAFLDRAFT_81834 [Branchiostoma floridae]
c54487.graph_c0	5.28178	0.293415	2.79222e-11	3.65467	up
c54604.graph_c0	4.2239	0.113539	1.22771e-05	3.79784	up
c54732.graph_c0	2.27727	0.210846	0.000118457	2.86531	up
c54738.graph_c0	3.56963	0.506302	1.82808e-08	2.54533	up	--	--	--	--	--	--	--	--	alpha-2 collagen [Strongylocentrotus purpuratus]
c54876.graph_c0	2.96034	0.569263	0.000509558	2.08268	up
c54933.graph_c0	0	1.31527	2.10343e-12	-5.43253	down	[J]	Translation, ribosomal structure and biogenesis	Biological Process: nematode larval development (GO:0002119);; Molecular Function: translation elongation factor activity (GO:0003746);; Molecular Function: GTPase activity (GO:0003924);; Molecular Function: GTP binding (GO:0005525);; Biological Process: GTP catabolic process (GO:0006184);; Biological Process: translational elongation (GO:0006414);; Biological Process: apoptotic process (GO:00069…	K03234|0.0|xla:100505433|hypothetical protein LOC100505433	[J]	Translation, ribosomal structure and biogenesis	Elongation factor G, domain IV;; Elongation factor G C-terminus;; Elongation factor Tu domain 2;; Elongation Factor G, domain II	Elongation factor 2 GN=eef-2 OS=Caenorhabditis elegans PE=1 SV=4	eukaryotic translation elongation factor 2, putative [Acanthamoeba castellanii str. Neff]
c54984.graph_c0	0	4.72506	0	-8.26848	down	--	--	--	--	--	--	Nepovirus coat protein, C-terminal domain;; Nepovirus coat protein, central domain;; Nepovirus coat protein, N-terminal domain	--	--
c55127.graph_c0	3.27793	0.327774	0.00648258	2.65263	up
c55154.graph_c0	1.20712	0.139275	2.85977e-07	2.75982	up	[L]	Replication, recombination and repair	--	--	[R]	General function prediction only	Integrase core domain	Uncharacterized protein K02A2.6 GN=K02A2.6 OS=Caenorhabditis elegans PE=3 SV=1	PREDICTED: uncharacterized protein K02A2.6-like [Acyrthosiphon pisum]
c55351.graph_c0	2.70764	0.311205	0.0030948	2.5663	up
c55497.graph_c0	16.2298	2.99634	1.14066e-09	2.22739	up
c55518.graph_c0	5.65505	0	0	5.88416	up	--	--	--	--	--	--	Extensin-like region	Formin-A GN=forA OS=Dictyostelium discoideum (Slime mold) PE=1 SV=1	hypothetical protein IscW_ISCW018444 [Ixodes scapularis]
c55525.graph_c0	1.60959	0.174945	1.69036e-05	2.75928	up	--	--	--	--	--	--	Helix-turn-helix of DDE superfamily endonuclease;; DDE superfamily endonuclease	--	PREDICTED: uncharacterized protein LOC100373789 [Saccoglossus kowalevskii]
c55598.graph_c0	2.74862	0.476218	1.45944e-07	2.2848	up	--	--	--	--	--	--	--	--	PREDICTED: uncharacterized protein LOC102808110 [Saccoglossus kowalevskii]
c55639.graph_c0	0	2.13151	8.96838e-13	-5.47659	down	[C]	Energy production and conversion	Molecular Function: translation elongation factor activity (GO:0003746);; Molecular Function: GTPase activity (GO:0003924);; Molecular Function: GTP binding (GO:0005525);; Biological Process: GTP catabolic process (GO:0006184);; Biological Process: translational elongation (GO:0006414);;	--	[C]	Energy production and conversion	Aldo/keto reductase family;; Elongation Factor G, domain II	Elongation factor 2 GN=EF2 OS=Drosophila melanogaster (Fruit fly) PE=1 SV=4	hypothetical protein IMG5_117220 [Ichthyophthirius multifiliis]
c55684.graph_c0	3.60588	0.406044	0.000256805	2.66211	up
c55775.graph_c0	11.3626	1.14272	9.99201e-16	3.06126	up
c55848.graph_c0	2.42423	0.321375	1.83343e-08	2.62677	up
c55854.graph_c0	2.48274	22.2083	0	-3.28958	down
c55965.graph_c0	0	8.03938	1.18944e-11	-5.34015	down	--	--	--	--	--	--	--	--	hypothetical protein IscW_ISCW024385 [Ixodes scapularis]
c56202.graph_c0	14.9297	0.121136	0	6.58168	up	--	--	--	--	--	--	Zona pellucida-like domain;; Zona pellucida-like domain	ZP domain-containing protein {ECO:0000303|PubMed:23765379} (Precursor) OS=Acropora millepora (Staghorn coral) PE=1 SV=1	predicted protein [Nematostella vectensis]
c56208.graph_c0	0.374994	2.12484	0.00471886	-2.3743	down
c56274.graph_c0	5.21018	19.4164	1.29086e-12	-2.0522	down
c56356.graph_c0	6.37552	0.383385	1.8463e-13	3.6324	up	--	--	Molecular Function: monooxygenase activity (GO:0004497);;	--	--	--	--	--	conserved hypothetical protein [Trichinella spiralis]
c56499.graph_c0	2.55749	0.12536	2.52365e-08	3.64179	up
c56534.graph_c0	72.6904	0.273943	0	7.66638	up	--	--	--	--	--	--	--	--	PREDICTED: proline-rich extensin-like protein EPR1 [Acromyrmex echinatior]
c56547.graph_c0	3.75458	0.560793	7.4583e-09	2.48792	up
c56565.graph_c0	0.257714	2.09381	0.000193406	-2.80975	down
c56642.graph_c0	2.82528	0.269059	0.000188481	2.82621	up	--	--	--	--	--	--	Spin/Ssty Family	--	--
c56823.graph_c0	0.58592	3.36342	1.1036e-05	-2.51248	down
c56843.graph_c0	0.133958	5.07894	7.32747e-15	-4.66962	down	[G]	Carbohydrate transport and metabolism	Molecular Function: glyceraldehyde-3-phosphate dehydrogenase (NAD+) (phosphorylating) activity (GO:0004365);; Cellular Component: cytoplasm (GO:0005737);; Biological Process: glycolysis (GO:0006096);; Molecular Function: NADP binding (GO:0050661);; Molecular Function: NAD binding (GO:0051287);; Biological Process: oxidation-reduction process (GO:0055114);;	K00134|1e-155|cin:100186457|similar to Glyceraldehyde-3-phosphate dehydrogenase (GAPDH)	[G]	Carbohydrate transport and metabolism	Glyceraldehyde 3-phosphate dehydrogenase, C-terminal domain;; Glyceraldehyde 3-phosphate dehydrogenase, NAD binding domain;; Dihydrodipicolinate reductase, N-terminus	Glyceraldehyde-3-phosphate dehydrogenase OS=Homarus americanus (American lobster) PE=1 SV=2	glyceraldehyde-3-phosphate dehydrogenase [Littorina littorea]
c56880.graph_c0	0.165429	1.06341	2.11842e-05	-2.62648	down	--	--	Molecular Function: RNA binding (GO:0003723);; Molecular Function: RNA-directed DNA polymerase activity (GO:0003964);; Biological Process: RNA-dependent DNA replication (GO:0006278);; Molecular Function: zinc ion binding (GO:0008270);; Biological Process: DNA integration (GO:0015074);;	--	--	--	Integrase core domain	--	PREDICTED: uncharacterized protein LOC100890015 [Strongylocentrotus purpuratus]
c56972.graph_c0	8.95146	124.417	0	-3.95256	down
c57055.graph_c0	3.31294	0.530888	1.07841e-06	2.36539	up
c57093.graph_c0	0.305268	2.22578	2.47731e-07	-2.82961	down
c57157.graph_c0	1.65782	0.269549	0.0010366	2.25713	up
c57242.graph_c0	9.37183	1.60782	1.10972e-07	2.29882	up
c57502.graph_c0	1.36143	0.113446	5.09925e-08	3.13266	up
c57512.graph_c0	11.5118	2.44709	4.9401e-06	2.00577	up
c57575.graph_c0	0.130198	0.881499	1.36201e-06	-2.72501	down	--	--	Molecular Function: nucleotide binding (GO:0000166);; Molecular Function: guanyl-nucleotide exchange factor activity (GO:0005085);; Biological Process: imaginal disc-derived leg morphogenesis (GO:0007480);; Biological Process: intracellular signal transduction (GO:0035556);; Molecular Function: anion binding (GO:0043168);;	--	[T]	Signal transduction mechanisms	RhoGEF domain	Muscle M-line assembly protein unc-89 GN=unc-89 OS=Caenorhabditis elegans PE=1 SV=3	PREDICTED: puratrophin-1-like [Strongylocentrotus purpuratus]
c57590.graph_c0	0.599249	5.82569	3.24185e-14	-3.30274	down
c57778.graph_c0	1.68263	0	4.13836e-12	5.33717	up	[P]	Inorganic ion transport and metabolism	Molecular Function: oxidoreductase activity (GO:0016491);;	--	--	--	Peroxidase	--	glutathione peroxidase-like protein [Crassostrea ariakensis]
c57892.graph_c0	0.0592677	2.22241	8.7475e-08	-4.18067	down	--	--	Biological Process: nematode larval development (GO:0002119);; Molecular Function: ubiquitin-protein ligase activity (GO:0004842);; Cellular Component: microtubule associated complex (GO:0005875);; Biological Process: apoptotic process (GO:0006915);; Biological Process: mitosis (GO:0007067);; Biological Process: male meiosis (GO:0007140);; Biological Process: spermatid development (GO:0007286);; …	K06689|3e-88|dre:100001914|ube2d4, MGC162263, zgc:162263	[O]	Posttranslational modification, protein turnover, chaperones	Ubiquitin-conjugating enzyme;; RWD domain	Ubiquitin-conjugating enzyme E2-17 kDa GN=eff OS=Drosophila melanogaster (Fruit fly) PE=2 SV=1	ubiquitinconjugating enzyme E2, putative [Acanthamoeba castellanii str. Neff]
c57943.graph_c0	1.26795	0.198105	0.00641548	2.25418	up	--	--	--	--	--	--	Immunoglobulin domain	--	--
c58099.graph_c0	17.9981	3.3328	9.2273e-10	2.22426	up
c58141.graph_c0	0.454208	3.15404	2.94504e-05	-2.70153	down
c58162.graph_c0	0	1.76191	5.8753e-13	-5.49812	down	--	--	--	--	--	--	--	--	dynein-related AAA-type ATPase, putative [Plasmodium reichenowi]
c58188.graph_c0	3.55984	0.123598	1.61664e-08	3.91991	up	--	--	Cellular Component: intracellular organelle (GO:0043229);;	--	[P]	Inorganic ion transport and metabolism	--	Histone H1, gonadal OS=Parechinus angulosus (Angulate sea urchin) PE=1 SV=1	nuclear protein [Ensis minor]
c58215.graph_c0	41.2501	2.79069	0	3.67318	up	--	--	--	--	--	--	Death domain	--	--
c58307.graph_c0	0	4.68268	1.19999e-05	-4.39842	down	--	--	--	--	[R]	General function prediction only	Fibrinogen beta and gamma chains, C-terminal globular domain	Techylectin-5B (Precursor) OS=Tachypleus tridentatus (Japanese horseshoe crab) PE=1 SV=1	AGAP011225-PA-like protein [Anopheles sinensis]
c58356.graph_c0	2.64841	0.464606	0.0033564	2.15125	up	--	--	--	--	--	--	--	--	hypothetical protein CLF_100574 [Clonorchis sinensis]
c58384.graph_c0	0.0572474	49.7546	0	-8.6703	down
c58483.graph_c0	1.49702	11.3656	0	-3.02545	down
c58693.graph_c0	0	4.7828	0	-6.18291	down	--	--	--	--	--	--	BURP domain	--	--
c58720.graph_c0	0	3.45327	2.86895e-11	-5.29165	down	--	--	--	--	[P]	Inorganic ion transport and metabolism	Metallothionein	Chorion class high-cysteine HCA protein 12 (Precursor) OS=Bombyx mori (Silk moth) PE=3 SV=1	--
c58770.graph_c0	1.90423	0.371371	2.01196e-06	2.11989	up	--	--	--	K06584|1e-124|bfo:BRAFLDRAFT_89654|hypothetical protein	[W]	Extracellular structures	Integrin alpha;; FG-GAP repeat;; FG-GAP repeat	Integrin alpha pat-2 (Precursor) GN=pat-2 OS=Caenorhabditis elegans PE=1 SV=1	hypothetical protein BRAFLDRAFT_89654 [Branchiostoma floridae]
c58821.graph_c0	5.5871	1.14195	0.000768616	2.00631	up
c58984.graph_c0	2.8001	19.3613	0	-2.93602	down	--	--	--	--	[R]	General function prediction only	Fibrinogen beta and gamma chains, C-terminal globular domain	Fibrinogen-like protein A (Precursor) OS=Parastichopus parvimensis (Warty sea cucumber) PE=2 SV=1	PREDICTED: ficolin-2-like [Saccoglossus kowalevskii]
c59087.graph_c0	1.01428	4.85981	0.00100944	-2.23953	down
c59096.graph_c0	4.98055	0.0676666	0	5.46489	up	--	--	--	K10402|0.0|dre:406257|Surhe, wu:fi04h04, wu:fi19d09, zgc:77087	[Z]	Cytoskeleton	Kinesin motor domain	Kinesin-related protein 12 GN=kif12 OS=Dictyostelium discoideum (Slime mold) PE=3 SV=1	hypothetical protein LOTGIDRAFT_134756 [Lottia gigantea]
c59152.graph_c0	3.61066	0	3.66374e-15	5.67742	up	--	--	--	--	[R]	General function prediction only	Barwin family;; Chitin recognition protein	--	hypothetical protein [Entamoeba dispar SAW760]
c59273.graph_c0	12.5187	0.0945263	0	6.73934	up	[E]	Amino acid transport and metabolism	Molecular Function: catalytic activity (GO:0003824);;	K13051|0.0|dre:795494|L-asparaginase-like	[E]	Amino acid transport and metabolism	Asparaginase;; tRNA synthetases class II (D, K and N);; HIT domain;; tRNA synthetases class II core domain (F);; Choline/Carnitine o-acyltransferase	Putative isoaspartyl peptidase/L-asparaginase beta chain (Precursor) GN=DDB_G0279357 OS=Dictyostelium discoideum (Slime mold) PE=3 SV=1	PREDICTED: asparagine--tRNA ligase [Hydra vulgaris]
c59332.graph_c0	5.0382	0.874636	1.84774e-08	2.29423	up	--	--	--	--	[T]	Signal transduction mechanisms	--	DNA ligase 1 GN=lig1 OS=Dictyostelium discoideum (Slime mold) PE=3 SV=1	PREDICTED: leucine-rich repeat-containing protein 43-like [Strongylocentrotus purpuratus]
c59363.graph_c0	6.11176	45.5172	0	-3.0076	down
c59424.graph_c0	1.99535	0.255799	0.000328567	2.52872	up
c59471.graph_c0	2.04968	0.28867	7.30888e-07	2.52187	up	--	--	--	--	--	--	Sulfotransferase family	--	PREDICTED: uncharacterized protein LOC102804645 [Saccoglossus kowalevskii]
c59483.graph_c0	0.289727	1.44855	0.000501273	-2.29904	down	--	--	--	--	--	--	BEN domain	--	PREDICTED: uncharacterized protein LOC100892686 [Strongylocentrotus purpuratus]
c59531.graph_c0	1.97413	0.170174	0.000902348	2.8562	up
c59685.graph_c0	46.7537	9.1181	1.55431e-14	2.18168	up	--	--	--	--	[R]	General function prediction only	Fibrinogen beta and gamma chains, C-terminal globular domain	Techylectin-5A (Precursor) OS=Tachypleus tridentatus (Japanese horseshoe crab) PE=1 SV=1	PREDICTED: tenascin-R-like [Strongylocentrotus purpuratus]
c59773.graph_c0	1.99677	0.342563	0.00692624	2.15737	up
c59972.graph_c1	10.8711	1.41883	3.48114e-08	2.63999	up
c60054.graph_c0	0.061842	2.62813	2.22045e-16	-4.83173	down	[O]	Posttranslational modification, protein turnover, chaperones	Molecular Function: ATP binding (GO:0005524);; Biological Process: response to stress (GO:0006950);; Molecular Function: 2-alkenal reductase [NAD(P)] activity (GO:0032440);; Biological Process: oxidation-reduction process (GO:0055114);;	--	[O]	Posttranslational modification, protein turnover, chaperones	Hsp70 protein	Heat shock 70 kDa protein cognate 4 OS=Manduca sexta (Tobacco hawkmoth) PE=2 SV=1	heat shock protein 70 [Pteria penguin]
c60095.graph_c0	69.3808	10.5452	0	2.54064	up	--	--	--	--	[R]	General function prediction only	Fibrinogen beta and gamma chains, C-terminal globular domain	Fibrinogen-like protein A (Precursor) OS=Parastichopus parvimensis (Warty sea cucumber) PE=2 SV=1	hypothetical protein BRAFLDRAFT_231341 [Branchiostoma floridae]
c60140.graph_c0	53.3154	10.756	3.70814e-13	2.13013	up
c60145.graph_c0	3.64036	0.493819	0.000177152	2.48422	up	--	--	--	--	[IG]	--	Saposin-like type B, region 2;; Saposin-like type B, region 1	--	PREDICTED: proactivator polypeptide-like [Strongylocentrotus purpuratus]
c60249.graph_c0	0.691582	0.124602	0.00495474	2.11416	up	--	--	--	K13249|1e-128|dre:373100|ssr1, cb758	[U]	Intracellular trafficking, secretion, and vesicular transport	Translocon-associated protein (TRAP), alpha subunit	Translocon-associated protein subunit alpha (Precursor) GN=ssr1 OS=Dictyostelium discoideum (Slime mold) PE=3 SV=1	Translocon-associated protein subunit alpha [Zootermopsis nevadensis]
c60289.graph_c0	3.07071	0.308818	4.12752e-07	2.90416	up
c60325.graph_c0	6.34226	1.289	1.43275e-05	2.0543	up
c60363.graph_c0	0.306361	2.01393	5.53657e-07	-2.70373	down
c60365.graph_c0	0	3.13601	0	-6.23514	down	[G]	Carbohydrate transport and metabolism	--	K09864|6e-55|bta:282653|AQP1, AQP-1, CHIP29, MGC129064	[G]	Carbohydrate transport and metabolism	Major intrinsic protein	Aquaporin AQPcic GN=AQP OS=Cicadella viridis (Green leafhopper) PE=1 SV=1	water and ammonia transporting aquaporin [Lumbricus rubellus]
c60402.graph_c0	0.15903	2.18654	0.000150967	-3.24659	down
c60491.graph_c0	0.118392	0.62481	0.00276338	-2.31875	down	--	--	--	--	--	--	--	--	PREDICTED: uncharacterized protein LOC587493 [Strongylocentrotus purpuratus]
c60588.graph_c0	10.5209	2.07753	3.06422e-14	2.1636	up	--	--	--	--	[TV]	--	AIG1 family	Histone-lysine N-methyltransferase, H3 lysine-79 specific {ECO:0000303|PubMed:21187070} OS=Dictyostelium discoideum (Slime mold) PE=2 SV=2	hypothetical protein EMH_0015390 [Eimeria mitis]
c60609.graph_c0	6.09271	0.972185	0.0002529	2.30361	up
c60610.graph_c0	2.54526	0.429918	3.83089e-06	2.29081	up
c60671.graph_c0	0	2.73167	9.54792e-15	-5.69745	down
c60701.graph_c0	0	4.73272	8.96838e-13	-5.47659	down	--	--	--	--	--	--	Pathogenesis-related protein Bet v I family	--	--
c60737.graph_c0	4.19233	0.196811	0	4.01516	up	--	--	--	--	[O]	Posttranslational modification, protein turnover, chaperones	Thrombospondin type 1 domain;; GCC2 and GCC3	Ectin {ECO:0000303|PubMed:23765379} (Precursor; Fragment) OS=Acropora millepora (Staghorn coral) PE=1 SV=1	PREDICTED: uncharacterized protein LOC580251 [Strongylocentrotus purpuratus]
c60952.graph_c0	8.22747	0.0878952	2.10942e-15	5.09112	up
c61029.graph_c0	4.60946	0.659565	1.00146e-08	2.53883	up
c61086.graph_c0	3.02025	0.580784	0.00520602	2.04293	up
c61120.graph_c0	0.0873141	2.18273	0.000109184	-3.61869	down	--	--	Biological Process: cell-cell adhesion (GO:0016337);; Molecular Function: carbohydrate binding (GO:0030246);;	--	[R]	General function prediction only	Fibrinogen beta and gamma chains, C-terminal globular domain	Techylectin-5B (Precursor) OS=Tachypleus tridentatus (Japanese horseshoe crab) PE=1 SV=1	tenascin [Apostichopus japonicus]
c61137.graph_c0	2.16015	0.445877	1.08047e-06	2.0522	up
c61194.graph_c0	1.92693	0.0879825	1.13203e-11	3.85767	up
c61388.graph_c0	1.33595	0.128449	1.36905e-06	2.93125	up	--	--	--	--	[T]	Signal transduction mechanisms	7 transmembrane receptor (Secretin family);; Latrophilin/CL-1-like GPS domain	Latrophilin-like protein LAT-2 {ECO:0000312|EMBL:CCD61661.1, ECO:0000312|WormBase:B0286.2b} (Precursor) OS=Caenorhabditis elegans PE=2 SV=1	PREDICTED: uncharacterized protein LOC592144 [Strongylocentrotus purpuratus]
c61487.graph_c0	2.35477	0.221538	8.47542e-08	2.99819	up
c61628.graph_c0	24.3124	5.29129	6.38378e-14	2.02954	up	--	--	--	--	--	--	Lecithin retinol acyltransferase	--	--
c61632.graph_c0	0	19.8573	0	-8.21096	down	--	--	--	--	--	--	Pathogenesis-related protein Bet v I family	Salivary glue protein Sgs-3 (Precursor) GN=Sgs3 OS=Drosophila melanogaster (Fruit fly) PE=2 SV=1	salivary gland secretion 1 [Drosophila melanogaster]
c61890.graph_c0	1.59466	0.189829	0.00493254	2.51804	up
c61900.graph_c0	47.1954	0	0	9.96406	up	[F]	Nucleotide transport and metabolism	--	--	--	--	Phosphorylase superfamily	--	hypothetical protein, partial [Hirudo medicinalis]
c61949.graph_c0	0.655831	2.52428	9.44415e-06	-2.03862	down
c62155.graph_c0	0.169465	1.34152	0.000292981	-2.77367	down
c62352.graph_c0	0.403269	2.92833	3.7488e-11	-2.90567	down	--	--	--	--	[S]	Function unknown	Protein of unknown function (DUF563)	EGF domain-specific O-linked N-acetylglucosamine transferase (Precursor) GN=Eogt OS=Drosophila melanogaster (Fruit fly) PE=1 SV=1	hypothetical protein BRAFLDRAFT_280112 [Branchiostoma floridae]
c62471.graph_c0	0.671634	3.07814	0.0020304	-2.17746	down
c62503.graph_c0	0.182305	1.033	0.00471886	-2.3743	down	--	--	--	--	--	--	Lecithin retinol acyltransferase	--	hypothetical protein CAPTEDRAFT_188520 [Capitella teleta]
c62701.graph_c0	0	4.40006	0	-6.34618	down	[G]	Carbohydrate transport and metabolism	--	K09864|5e-50|ssc:407773|AQP1	[G]	Carbohydrate transport and metabolism	Major intrinsic protein	Aquaporin AQPAe.a GN=AAEL003512 OS=Aedes aegypti (Yellowfever mosquito) PE=2 SV=2	water and ammonia transporting aquaporin [Lumbricus rubellus]
c62750.graph_c1	1.04896	0.0728404	2.9481e-05	3.15521	up	--	--	--	--	[S]	Function unknown	Protein of unknown function (DUF563)	--	PREDICTED: protein O-linked-mannose beta-1,4-N-acetylglucosaminyltransferase 2-like [Saccoglossus kowalevskii]
c62841.graph_c0	2.143	8.61063	9.92217e-12	-2.15018	down	--	--	--	K09672|4e-43|dre:796549|chst8	[MW]	--	Sulfotransferase family	--	Carbohydrate sulfotransferase 11 [Zootermopsis nevadensis]
c62895.graph_c0	2.52038	0.233355	0.00241886	2.758	up
c62903.graph_c0	7.60965	1.0088	1.83343e-08	2.62677	up
c63009.graph_c0	3.74745	0.537237	2.47448e-08	2.53013	up	--	--	--	--	--	--	--	--	hypothetical protein LOAG_02363 [Loa loa]
c63194.graph_c0	0	3.85294	5.8753e-13	-5.49812	down	--	--	--	--	--	--	--	--	putative salivary protein [Culicoides sonorensis]
c63382.graph_c0	4.02617	0.547747	4.45976e-05	2.50652	up	--	--	--	--	[T]	Signal transduction mechanisms	--	Acetylcholine receptor subunit alpha-L1 (Precursor) OS=Schistocerca gregaria (Desert locust) PE=2 SV=1	Neuronal acetylcholine receptor subunit alpha-10 [Crassostrea gigas]
c63457.graph_c0	0.806691	3.90312	1.54047e-10	-2.38785	down	--	--	--	--	[O]	Posttranslational modification, protein turnover, chaperones	Hsp20/alpha crystallin family	Protein lethal(2)essential for life GN=l(2)efl OS=Drosophila melanogaster (Fruit fly) PE=1 SV=1	heat shock protein 26 [Apostichopus japonicus]
c63640.graph_c0	2.98055	0.392155	5.71483e-06	2.57459	up
c63812.graph_c0	0.0904411	3.08989	5.55092e-07	-4.05088	down
c63871.graph_c0	7.19518	0.622188	2.19258e-12	3.20192	up
c64054.graph_c1	0.240973	1.66376	5.02862e-06	-2.72689	down
c64067.graph_c0	1.61055	0.260953	0.00308255	2.23667	up	--	--	--	--	[A]	RNA processing and modification	G-patch domain;; Survival motor neuron protein (SMN)	Zinc finger CCCH-type with G patch domain-containing protein GN=v1g244155 OS=Nematostella vectensis (Starlet sea anemone) PE=3 SV=1	PREDICTED: zinc finger CCCH-type with G patch domain-containing protein-like isoform 1 [Strongylocentrotus purpuratus]
c64088.graph_c1	10.3146	0	5.77316e-15	5.65707	up
c64186.graph_c0	4.2671	21.5553	0	-2.49306	down	--	--	--	--	--	--	EMI domain	--	--
c64203.graph_c0	2.27876	0.139622	4.58938e-10	3.51602	up
c64415.graph_c0	140.381	27.3826	1.11022e-16	2.18851	up	[H]	Coenzyme transport and metabolism	--	--	--	--	--	Protein PFC0760c GN=PFC0760c OS=Plasmodium falciparum (isolate 3D7) PE=4 SV=1	hypothetical protein C922_02860 [Plasmodium inui San Antonio 1]
c64632.graph_c0	2.13939	0.27855	1.19636e-06	2.60661	up
c64704.graph_c0	0.394315	2.10588	6.08782e-10	-2.5084	down
c64723.graph_c0	10.8755	0.0499307	0	7.14713	up	--	--	--	--	--	--	Sushi domain (SCR repeat)	--	--
c65044.graph_c0	0.552717	2.40155	3.24364e-05	-2.17642	down
c65274.graph_c0	11.9227	1.08876	4.45179e-09	3.06844	up
c65280.graph_c0	2.08714	0.303346	8.71147e-08	2.50389	up	--	--	--	--	[R]	General function prediction only	Endonuclease-reverse transcriptase	--	predicted protein [Nematostella vectensis]
c65414.graph_c0	3.02528	14.7204	6.83897e-14	-2.41864	down
c65479.graph_c0	5.85215	0	0	6.94085	up	--	--	--	--	--	--	BURP domain	--	--
c65565.graph_c0	13.4531	2.53323	8.88178e-16	2.23428	up
c65633.graph_c0	4.9185	1.01756	6.08708e-08	2.06338	up
c65653.graph_c0	15.3727	58.6342	1.29896e-14	-2.09142	down
c65840.graph_c0	29.7425	2.64256	0	3.31302	up	--	--	--	--	--	--	AIG1 family	--	hypothetical protein BRAFLDRAFT_225057 [Branchiostoma floridae]
c65877.graph_c0	2.98088	24.5048	0	-3.17015	down	--	--	--	--	--	--	--	--	hypothetical protein TTRE_0000953901 [Trichuris trichiura]
c65891.graph_c0	57.2353	9.4755	0	2.42245	up	--	--	--	--	[T]	Signal transduction mechanisms	Fibronectin type III domain	--	hypothetical protein Y032_0012g1879 [Ancylostoma ceylanicum]
c65914.graph_c0	1.51705	7.9175	0	-2.5362	down	--	--	--	--	--	--	--	--	hypothetical protein CGI_10017781 [Crassostrea gigas]
c65957.graph_c0	15.907	138.557	0	-3.27361	down	--	--	Molecular Function: catalytic activity (GO:0003824);;	--	[T]	Signal transduction mechanisms	--	Spidroin-2 (Fragment) OS=Nephila clavipes (Golden silk orbweaver) PE=2 SV=1	hypothetical protein TTRE_0000953901 [Trichuris trichiura]
c65970.graph_c0	11.228	1.85174	1.45255e-11	2.39009	up	--	--	--	--	--	--	--	--	hypothetical protein CAPTEDRAFT_188079 [Capitella teleta]
c66039.graph_c0	0.171151	2.56711	8.6168e-08	-3.56014	down
c66146.graph_c1	1.77546	41.6823	0	-4.63643	down	--	--	--	--	--	--	--	--	Cell wall-associated hydrolase [Trichuris trichiura]
c66351.graph_c1	47.4277	10.2919	3.04201e-14	2.03468	up	--	--	--	K13171|8e-06|gga:428216|SRRM1	[A]	RNA processing and modification	--	--	--
c66440.graph_c0	1.02277	0.149145	0.000603508	2.38328	up
c66534.graph_c0	2.60826	0.293046	1.73739e-09	2.84222	up	--	--	--	--	--	--	--	--	hypothetical protein CAPTEDRAFT_211426 [Capitella teleta]
c66967.graph_c0	2.97709	0.256631	0.000902348	2.8562	up	[OU]	--	Molecular Function: binding (GO:0005488);;	--	[O]	Posttranslational modification, protein turnover, chaperones	Zinc knuckle;; Zinc knuckle	DNA-binding protein HEXBP GN=HEXBP OS=Leishmania major PE=3 SV=1	universal minicircle sequence binding protein, partial [Nuttalliella namaqua]
c67077.graph_c0	1.67668	0.261966	0.00641548	2.25418	up
c67228.graph_c0	0	1.96902	0	-7.59883	down	[L]	Replication, recombination and repair	Molecular Function: catalytic activity (GO:0003824);;	--	[R]	General function prediction only	Cauliflower mosaic virus peptidase (A3);; Reverse transcriptase (RNA-dependent DNA polymerase);; Caulimovirus viroplasmin;; Zinc knuckle	Endonuclease GN=pol OS=Drosophila melanogaster (Fruit fly) PE=3 SV=1	reverse transcriptase/ribonuclease H, partial [Nuttalliella namaqua]
c67533.graph_c0	2.07175	0.386943	0.000143862	2.13318	up
c67547.graph_c0	7.8261	0.873998	0	2.95039	up
c67657.graph_c0	441.141	48.6024	0	3.0161	up	--	--	--	--	[R]	General function prediction only	Fibrinogen beta and gamma chains, C-terminal globular domain	Fibrinogen-like protein A (Precursor) OS=Parastichopus parvimensis (Warty sea cucumber) PE=2 SV=1	RecName: Full=Fibrinogen-like protein A; Short=FREP-A; Flags: Precursor [Parastichopus parvimensis]
c67739.graph_c0	3.81628	0.785196	1.90189e-05	2.03689	up	--	--	--	--	--	--	zinc-binding in reverse transcriptase	--	pol-like protein [Ciona intestinalis]
c67786.graph_c0	1.05983	0	2.17049e-06	4.49214	up
c67956.graph_c0	0.571331	2.38041	3.81742e-06	-2.14399	down
c68011.graph_c0	4.79443	0.930904	7.13902e-07	2.13208	up
c68232.graph_c0	6.29594	1.34521	6.33161e-09	2.02952	up	[RTKL]	--	Molecular Function: transferase activity, transferring phosphorus-containing groups (GO:0016772);;	--	[TU]	--	Protein tyrosine kinase;; Protein kinase domain	Tyrosine-protein kinase transmembrane receptor Ror (Precursor) GN=Ror OS=Drosophila melanogaster (Fruit fly) PE=1 SV=1	hypothetical protein BRAFLDRAFT_241990 [Branchiostoma floridae]
c69306.graph_c0	0.936334	3.53024	5.66058e-10	-2.05473	down	[Q]	Secondary metabolites biosynthesis, transport and catabolism	Biological Process: cellular process (GO:0009987);; Molecular Function: transferase activity, transferring phosphorus-containing groups (GO:0016772);;	--	[T]	Signal transduction mechanisms	--	Cell death abnormality protein 1 {ECO:0000303|PubMed:11163239} (Precursor) OS=Caenorhabditis elegans PE=1 SV=1	hypothetical protein BRAFLDRAFT_212058 [Branchiostoma floridae]
c69419.graph_c0	2.58617	9.33217	2.03525e-11	-2.00321	down	--	--	--	--	--	--	STOP protein	--	PREDICTED: protein FAM154A-like [Strongylocentrotus purpuratus]
c69979.graph_c0	1.14123	10.4469	0	-3.33327	down	--	--	--	--	[T]	Signal transduction mechanisms	--	Integrin beta-like protein C (Precursor) GN=sibC OS=Dictyostelium discoideum (Slime mold) PE=1 SV=1	hypothetical protein CGI_10004094 [Crassostrea gigas]
c70128.graph_c0	2.68491	0.402714	8.09107e-05	2.39038	up	[OU]	--	Molecular Function: binding (GO:0005488);;	--	[O]	Posttranslational modification, protein turnover, chaperones	Zinc knuckle	DNA-binding protein HEXBP GN=HEXBP OS=Leishmania major PE=3 SV=1	poly-zinc finger protein 2 [Trypanosoma cruzi strain CL Brener]
c70338.graph_c0	12.0684	2.63862	4.41758e-13	2.02022	up
c70652.graph_c0	0.72361	2.79952	0.000328235	-2.01252	down	--	--	--	--	[R]	General function prediction only	Fibrinogen beta and gamma chains, C-terminal globular domain	Fibrinogen-like protein A (Precursor) OS=Parastichopus parvimensis (Warty sea cucumber) PE=2 SV=1	PREDICTED: fibrinogen-like protein A-like, partial [Saccoglossus kowalevskii]
c71005.graph_c0	0.472692	2.60308	1.18161e-10	-2.55529	down	--	--	--	--	--	--	Sulfotransferase family	--	PREDICTED: uncharacterized protein LOC752507 [Strongylocentrotus purpuratus]
c71007.graph_c1	11.2434	1.6459	1.33227e-15	2.57317	up
c71252.graph_c0	3.07392	0.483708	3.17968e-13	2.46344	up	--	--	--	K04151|6e-33|spu:589822|hypothetical LOC589822	[R]	General function prediction only	7 transmembrane receptor (rhodopsin family);; Serpentine type 7TM GPCR chemoreceptor Srsx	Probable G-protein coupled receptor No9 OS=Amphibalanus amphitrite (Striped barnacle) PE=3 SV=1	PREDICTED: histamine H3 receptor-like [Saccoglossus kowalevskii]
c71356.graph_c0	4.05427	0.465981	1.33134e-06	2.74358	up
c71372.graph_c0	1.9131	0.222713	2.05114e-12	2.84333	up	--	--	--	--	--	--	--	--	hypothetical protein OXYTRI_08177 [Oxytricha trifallax]
c71442.graph_c0	40.8136	6.33579	0	2.50231	up	--	--	--	--	--	--	Immunoglobulin V-set domain;; Immunoglobulin I-set domain;; Immunoglobulin domain	--	--
c72349.graph_c0	3.52155	0.750286	1.61692e-08	2.03009	up	--	--	Molecular Function: kinase activity (GO:0016301);;	--	[T]	Signal transduction mechanisms	Protein kinase domain;; Protein tyrosine kinase	Probable serine/threonine-protein kinase roco7 GN=roco7 OS=Dictyostelium discoideum (Slime mold) PE=3 SV=1	unnamed protein product [Oikopleura dioica]
c72857.graph_c0	0.907535	3.54056	4.35684e-06	-2.06091	down	--	--	--	--	--	--	Immunoglobulin domain	--	--
c73105.graph_c0	9.93478	1.33524	3.56537e-12	2.65972	up
c73330.graph_c0	10.2571	2.08999	6.5845e-11	2.10569	up
c73580.graph_c0	0.0610009	2.74488	1.56946e-09	-4.43596	down	--	--	--	--	--	--	TMEM154 protein family	--	--
c73725.graph_c2	6.94882	1.0189	4.78506e-14	2.56186	up	--	--	--	--	--	--	Sulfotransferase family	--	--
c73918.graph_c0	1.075	5.34023	6.43443e-10	-2.41589	down
c73968.graph_c0	1.2511	0.0297864	1.44827e-06	3.96581	up	--	--	--	K13443|2e-18|tad:TRIADDRAFT_37155|expressed hypothetical protein	[S]	Function unknown	ML domain	Ecdysteroid-regulated 16 kDa protein (Precursor) GN=ESR16 OS=Manduca sexta (Tobacco hawkmoth) PE=2 SV=1	hypothetical protein LOTGIDRAFT_79115, partial [Lottia gigantea]
c74225.graph_c0	3.09643	0.173063	0	3.82491	up	[T]	Signal transduction mechanisms	--	--	[R]	General function prediction only	WD domain, G-beta repeat	General transcriptional corepressor tupA GN=tupA OS=Dictyostelium discoideum (Slime mold) PE=2 SV=1	hypothetical protein BRAFLDRAFT_126756 [Branchiostoma floridae]
c74568.graph_c0	3.09847	0.654742	5.1309e-12	2.06229	up	--	--	--	--	[O]	Posttranslational modification, protein turnover, chaperones	Reprolysin (M12B) family zinc metalloprotease;; Thrombospondin type 1 domain;; Reprolysin family propeptide;; Metallo-peptidase family M12;; CXCXC repeat;; Metallo-peptidase family M12B Reprolysin-like	A disintegrin and metalloproteinase with thrombospondin motifs gon-1 (Precursor) GN=gon-1 OS=Caenorhabditis elegans PE=1 SV=3	PREDICTED: A disintegrin and metalloproteinase with thrombospondin motifs 13-like [Strongylocentrotus purpuratus]
c74625.graph_c0	17.0126	2.76318	7.08049e-09	2.3835	up	--	--	--	--	--	--	--	--	hypothetical protein CAPTEDRAFT_215706 [Capitella teleta]
c75120.graph_c0	10.312	1.502	1.78746e-14	2.57338	up
c75343.graph_c0	1.8393	0.222161	0	2.86385	up	[RTKL]	--	--	K12567|0.0|spu:590007|similar to titin isoform N2-A	[Z]	Cytoskeleton	Fibronectin type III domain;; Immunoglobulin I-set domain;; Immunoglobulin domain;; Protein kinase domain;; Immunoglobulin domain;; Immunoglobulin V-set domain;; Immunoglobulin domain;; Protein tyrosine kinase;; CD80-like C2-set immunoglobulin domain;; Tissue factor;; Immunoglobulin C1-set domain;; Natural killer cell receptor 2B4;; SusE outer membrane protein;; Alphaherpesvirus glycoprotein I	Twitchin {ECO:0000303|PubMed:7190524} OS=Caenorhabditis elegans PE=1 SV=3	PREDICTED: titin-like [Strongylocentrotus purpuratus]
c75353.graph_c0	12.0704	1.94951	0	2.4499	up	--	--	--	--	[U]	Intracellular trafficking, secretion, and vesicular transport	--	Interaptin GN=abpD OS=Dictyostelium discoideum (Slime mold) PE=1 SV=1	Viral A-type inclusion protein repeat [Entamoeba histolytica HM-1:IMSS]
c75392.graph_c0	4.51906	132.393	0	-4.98715	down
c75395.graph_c0	19.287	140.238	0	-3.01291	down	--	--	--	--	--	--	--	--	hypothetical protein CAPTEDRAFT_103064, partial [Capitella teleta]
c75405.graph_c0	66.409	0.0234184	0	9.98739	up	--	--	Molecular Function: protein binding (GO:0005515);; Biological Process: single-organism process (GO:0044699);;	--	[WV]	--	von Willebrand factor type D domain	--	hypothetical protein CAPTEDRAFT_122721 [Capitella teleta]
c75412.graph_c0	58.2894	0.142718	0	7.92817	up	--	--	--	--	--	--	Zona pellucida-like domain	--	PREDICTED: uncharacterized protein LOC100892086 [Strongylocentrotus purpuratus]
c75415.graph_c0	55.8131	0.77378	0	5.90025	up	[R]	General function prediction only	--	K00355|1e-105|dre:322506|nqo1, wu:fb63c10, zgc:77191	--	--	Flavodoxin-like fold;; NADPH-dependent FMN reductase	--	hypothetical protein CAPTEDRAFT_154919 [Capitella teleta]
c75419.graph_c0	32.2082	0	0	7.35506	up
c75422.graph_c0	0.454796	16.1538	0	-5.08981	down
c75430.graph_c0	25.2663	0.374627	0	5.7135	up	[J]	Translation, ribosomal structure and biogenesis	Molecular Function: translation elongation factor activity (GO:0003746);; Molecular Function: GTPase activity (GO:0003924);; Molecular Function: GTP binding (GO:0005525);; Cellular Component: lipid particle (GO:0005811);; Cellular Component: cytosol (GO:0005829);; Cellular Component: eukaryotic translation elongation factor 1 complex (GO:0005853);; Cellular Component: microtubule associated compl…	K03231|0.0|dre:30516|ef1a, EFL1-alpha, chunp6927, eef1a, ik:tdsubc_2a3, ik:tdsubc_2b3, tdsubc_2a3, wu:fa91c07, wu:fa94b03, wu:fi13b09, xx:tdsubc_2a3, xx:tdsubc_2b3	[J]	Translation, ribosomal structure and biogenesis	Elongation factor Tu GTP binding domain;; Elongation factor Tu domain 2	Elongation factor 1-alpha 1 GN=Ef1alpha48D OS=Drosophila melanogaster (Fruit fly) PE=1 SV=2	PREDICTED: elongation factor 1-alpha [Microplitis demolitor]
c75435.graph_c0	31.4228	0.166778	0	6.59463	up	--	--	Molecular Function: actin binding (GO:0003779);; Cellular Component: cytoplasm (GO:0005737);; Cellular Component: cytoskeleton (GO:0005856);; Biological Process: sequestering of actin monomers (GO:0042989);;	K13785|6e-16|oaa:100077739|similar to thymosin, beta 10	[N]	Cell motility	--	Thymosin beta OS=Aplysia californica (California sea hare) PE=1 SV=1	PREDICTED: thymosin beta-12-like [Amphimedon queenslandica]
c75449.graph_c0	7.1663	0	1.23016e-06	4.53737	up
c75458.graph_c0	20.0241	0.155457	0	6.26759	up	--	--	Molecular Function: protein binding (GO:0005515);; Cellular Component: microtubule associated complex (GO:0005875);; Biological Process: long-term memory (GO:0007616);; Molecular Function: lipid binding (GO:0008289);; Biological Process: determination of adult lifespan (GO:0008340);;	K08752|1e-57|dre:171478|fabp3, H-FABP, O-FABP, cb889, fabp11	[I]	Lipid transport and metabolism	Lipocalin / cytosolic fatty-acid binding protein family;; Lipocalin / cytosolic fatty-acid binding protein family	Fatty acid-binding protein homolog 6 GN=lbp-6 OS=Caenorhabditis elegans PE=1 SV=1	hypothetical protein CAPTEDRAFT_21682 [Capitella teleta]
c75460.graph_c0	0.230167	1.87959	1.26063e-05	-2.88284	down
c75462.graph_c0	13.0087	0	5.70655e-14	5.55078	up	[J]	Translation, ribosomal structure and biogenesis	Molecular Function: structural constituent of ribosome (GO:0003735);; Cellular Component: ribosome (GO:0005840);; Biological Process: translation (GO:0006412);;	--	[J]	Translation, ribosomal structure and biogenesis	--	60S ribosomal protein L12 GN=rpl-12 OS=Caenorhabditis elegans PE=3 SV=1	ribosomal protein L12 [Anthopleura elegantissima]
c75463.graph_c0	21.9158	0.363788	0	5.3788	up	--	--	--	--	[I]	Lipid transport and metabolism	Lipocalin / cytosolic fatty-acid binding protein family;; Lipocalin / cytosolic fatty-acid binding protein family	Fatty acid-binding protein homolog 1 GN=FABP1 OS=Echinococcus granulosus (Hydatid tapeworm) PE=1 SV=2	fatty acid binding protein [Taenia pisiformis]
c75464.graph_c0	18.251	0.337962	0	5.27686	up	[F]	Nucleotide transport and metabolism	Molecular Function: nucleoside diphosphate kinase activity (GO:0004550);; Molecular Function: ATP binding (GO:0005524);; Biological Process: nucleoside diphosphate phosphorylation (GO:0006165);; Biological Process: GTP biosynthetic process (GO:0006183);; Biological Process: UTP biosynthetic process (GO:0006228);; Biological Process: CTP biosynthetic process (GO:0006241);;	K00940|2e-83|dre:30083|nme2b.1, NDPK-Z1, NM23-B, ndpkz1, nm23b, nme1, nme2	[F]	Nucleotide transport and metabolism	Nucleoside diphosphate kinase	Nucleoside diphosphate kinase (Fragment) OS=Drosophila yakuba (Fruit fly) PE=2 SV=1	nucleoside diphosphate kinase [Eriocheir sinensis]
c75466.graph_c0	0	14.8052	0	-7.5009	down	--	--	--	--	[P]	Inorganic ion transport and metabolism	Metallothionein	Copper-specific metallothionein-2 OS=Callinectes sapidus (Blue crab) PE=3 SV=1	hypothetical protein [Trichomonas vaginalis G3]
c75476.graph_c0	15.6827	0.224539	0	5.59104	up	[J]	Translation, ribosomal structure and biogenesis	Molecular Function: translation elongation factor activity (GO:0003746);; Molecular Function: GTPase activity (GO:0003924);; Molecular Function: GTP binding (GO:0005525);; Cellular Component: cytoplasm (GO:0005737);; Biological Process: GTP catabolic process (GO:0006184);; Biological Process: translational elongation (GO:0006414);;	K03231|1e-94|cin:100179043|similar to elongation factor 1A	[J]	Translation, ribosomal structure and biogenesis	Elongation factor Tu C-terminal domain;; Elongation factor Tu domain 2	Elongation factor 1-alpha OS=Apis mellifera (Honeybee) PE=3 SV=1	PREDICTED: elongation factor 1-alpha [Ciona intestinalis]
c75483.graph_c0	0	13.1859	0	-7.53776	down	--	--	--	--	[DZ]	--	Translationally controlled tumour protein	Translationally-controlled tumor protein homolog 1 GN=DDB_G0282853 OS=Dictyostelium discoideum (Slime mold) PE=3 SV=1	hypothetical protein [Paramecium tetraurelia strain d4-2]
c75484.graph_c0	5.53422	0.859786	1.89146e-05	2.37149	up	--	--	--	--	--	--	DNA packaging protein FI	Uncharacterized protein DDB_G0271670 (Precursor) GN=DDB_G0271670 OS=Dictyostelium discoideum (Slime mold) PE=3 SV=1	hypothetical protein EAH_00029000 [Eimeria acervulina]
c75485.graph_c0	10.7984	0.148729	0	5.22901	up	--	--	Molecular Function: structural constituent of ribosome (GO:0003735);; Cellular Component: microtubule associated complex (GO:0005875);; Biological Process: translation (GO:0006412);; Cellular Component: cytosolic small ribosomal subunit (GO:0022627);;	K02977|1e-115|cfa:474599|RPS27A	[J]	Translation, ribosomal structure and biogenesis	Ubiquitin family;; Ribosomal protein S27a;; Ubiquitin-2 like Rad60 SUMO-like;; Ubiquitin-like domain	40S ribosomal protein S27a (Precursor) GN=RpS27A OS=Drosophila melanogaster (Fruit fly) PE=1 SV=2	ubiquitin/ribosomal protein S27 precursor [Crassostrea gigas]
c75498.graph_c0	14.0431	0.214059	0	5.55629	up	[J]	Translation, ribosomal structure and biogenesis	Biological Process: ribosomal small subunit assembly (GO:0000028);; Molecular Function: structural constituent of ribosome (GO:0003735);; Biological Process: translation (GO:0006412);; Cellular Component: cytosolic small ribosomal subunit (GO:0022627);;	K02998|0.0|dre:394027|rpsa, MGC55831, lamr1, zgc:55831, zgc:77824	[J]	Translation, ribosomal structure and biogenesis	Ribosomal protein S2	40S ribosomal protein SA {ECO:0000255|HAMAP-Rule:MF_03015} OS=Pinctada fucata (Pearl oyster) PE=2 SV=1	37 kDa laminin receptor precursor [Hyriopsis cumingii]
c75500.graph_c0	9.09681	0.086139	0	5.76443	up	[J]	Translation, ribosomal structure and biogenesis	Molecular Function: RNA binding (GO:0003723);; Molecular Function: structural constituent of ribosome (GO:0003735);; Biological Process: translation (GO:0006412);; Cellular Component: small ribosomal subunit (GO:0015935);;	K02981|0.0|dre:325635|fc94f01	[J]	Translation, ribosomal structure and biogenesis	Ribosomal protein S5, N-terminal domain;; Ribosomal protein S5, C-terminal domain	40S ribosomal protein S2 GN=RPS2 OS=Urechis caupo (Innkeeper worm) PE=2 SV=1	RecName: Full=40S ribosomal protein S2 [Urechis caupo]
c75504.graph_c0	0	5.12235	2.07332e-07	-4.72499	down	--	--	Cellular Component: chloroplast (GO:0009507);; Biological Process: photosynthesis, light harvesting (GO:0009765);; Cellular Component: membrane (GO:0016020);;	--	--	--	Chlorophyll A-B binding protein	--	light-harvesting complex protein LHCG4 [Bigelowiella natans]
c75505.graph_c0	8.43315	0.192527	2.08944e-13	4.51075	up	[J]	Translation, ribosomal structure and biogenesis	Molecular Function: structural constituent of ribosome (GO:0003735);; Cellular Component: ribosome (GO:0005840);; Biological Process: translation (GO:0006412);;	K02870|2e-81|dre:327089|rpl12, MGC103615, fj18a12, wu:fa27c04, wu:fa91d03, wu:fb14g09, wu:fj18a12, wu:fj26g11, zgc:103615	[J]	Translation, ribosomal structure and biogenesis	Ribosomal protein L11, RNA binding domain;; Ribosomal protein L11, N-terminal domain	60S ribosomal protein L12 GN=rpl-12 OS=Caenorhabditis elegans PE=3 SV=1	60S ribosomal protein L12 [Culex quinquefasciatus]
c75508.graph_c0	7.93275	0.159283	3.33067e-15	4.6927	up	[J]	Translation, ribosomal structure and biogenesis	Molecular Function: structural constituent of ribosome (GO:0003735);; Cellular Component: ribosome (GO:0005840);; Biological Process: translation (GO:0006412);;	K02951|2e-91|dre:337007|rps12, fa95a02, wu:fa95a02, zgc:73055	[J]	Translation, ribosomal structure and biogenesis	Ribosomal protein L7Ae/L30e/S12e/Gadd45 family	40S ribosomal protein S12 GN=RpS12 OS=Drosophila melanogaster (Fruit fly) PE=1 SV=2	40S ribosomal protein S12 [Branchiostoma belcheri]
c75510.graph_c0	7.805	0	0	6.26646	up
c75513.graph_c0	6.33816	1.04633	3.72255e-08	2.35358	up
c75514.graph_c0	4.19615	0	3.99625e-07	4.6238	up
c75518.graph_c0	0	7.90708	0	-6.38137	down	[C]	Energy production and conversion	Molecular Function: electron carrier activity (GO:0009055);; Cellular Component: apicoplast (GO:0020011);; Biological Process: electron transport chain (GO:0022900);; Molecular Function: metal ion binding (GO:0046872);; Molecular Function: 2 iron, 2 sulfur cluster binding (GO:0051537);;	--	--	--	2Fe-2S iron-sulfur cluster binding domain	--	hypothetical protein BRAFLDRAFT_126940 [Branchiostoma floridae]
c75521.graph_c0	0	6.69696	1.37201e-12	-5.45472	down	--	--	--	--	--	--	--	Uncharacterized proline-rich protein (Fragment) OS=Owenia fusiformis PE=4 SV=1	hypothetical protein EAI_03683 [Harpegnathos saltator]
c75525.graph_c0	4.74637	0.68191	1.066e-05	2.46777	up
c75528.graph_c0	0	5.31583	0	-6.76568	down	[M]	Cell wall/membrane/envelope biogenesis	--	K00750|2e-18|ptr:460765|GYG1	[G]	Carbohydrate transport and metabolism	Glycosyl transferase family 8	--	hypothetical protein ACA1_068430 [Acanthamoeba castellanii str. Neff]
c75531.graph_c0	7.62798	0.0794535	8.88178e-16	5.12701	up	[J]	Translation, ribosomal structure and biogenesis	Molecular Function: structural constituent of ribosome (GO:0003735);; Cellular Component: ribosome (GO:0005840);; Biological Process: translation (GO:0006412);;	K02900|1e-104|dre:336726|fa93g12, wu:fa93g12	[J]	Translation, ribosomal structure and biogenesis	Ribosomal protein L18e/L15	60S ribosomal protein L27a GN=RpL27A OS=Tenebrio molitor (Yellow mealworm beetle) PE=2 SV=1	putative ribosomal protein L27Ae [Graphocephala atropunctata]
c75536.graph_c0	0	6.85158	0	-6.47122	down	[C]	Energy production and conversion	--	--	--	--	Copper binding proteins, plastocyanin/azurin family;; Cupredoxin-like domain	--	PREDICTED: extensin-like [Tribolium castaneum]
c75563.graph_c0	0	6.41627	0	-6.08669	down	--	--	--	--	--	--	Photosystem II 10 kDa polypeptide PsbR	--	photosystem II protein PSII10 [Gymnochlora stellata]
c75572.graph_c0	0.120699	3.72133	3.6612e-06	-3.90825	down
c75577.graph_c0	6.08027	0.033115	0	6.05062	up	[P]	Inorganic ion transport and metabolism	Molecular Function: ferroxidase activity (GO:0004322);; Cellular Component: cytoplasm (GO:0005737);; Biological Process: iron ion transport (GO:0006826);; Biological Process: cellular iron ion homeostasis (GO:0006879);; Molecular Function: ferric iron binding (GO:0008199);; Biological Process: oxidation-reduction process (GO:0055114);;	K00522|1e-113|dre:58108|fth1a, fb06g09, fth1, hm:zeh1145, wu:fb06g09, wu:fq18c10, zeh1145	[P]	Inorganic ion transport and metabolism	Ferritin-like domain	Soma ferritin OS=Lymnaea stagnalis (Great pond snail) PE=2 SV=2	Ferritin, heavy subunit [Caligus clemensi]
c75579.graph_c0	0	4.30217	0	-6.15607	down	--	--	Biological Process: cellular process (GO:0009987);; Cellular Component: membrane (GO:0016020);;	--	--	--	Photosystem I reaction centre subunit III	--	photosystem I protein PsaF [Bigelowiella natans]
c75583.graph_c0	0	4.13539	0	-6.14246	down	--	--	--	--	--	--	Cupin;; Cupin domain	Spherulin-1A (Precursor) OS=Physarum polycephalum (Slime mold) PE=1 SV=1	spherulin 1b
c75588.graph_c0	0	4.19616	0	-6.28555	down	--	--	--	--	--	--	Chlorophyll A-B binding protein	--	putative chlorophyll a/b binding protein, partial [Hirudo medicinalis]
c75590.graph_c0	5.2326	0.133477	1.11022e-16	4.56553	up	[J]	Translation, ribosomal structure and biogenesis	Molecular Function: RNA binding (GO:0003723);; Molecular Function: structural constituent of ribosome (GO:0003735);; Biological Process: translation (GO:0006412);; Cellular Component: large ribosomal subunit (GO:0015934);;	K02938|0.0|dre:393686|rpl8, MGC73105, zgc:73105, zgc:77641	[J]	Translation, ribosomal structure and biogenesis	Ribosomal Proteins L2, C-terminal domain;; Ribosomal Proteins L2, RNA binding domain	60S ribosomal protein L8 GN=RpL8 OS=Anopheles gambiae (African malaria mosquito) PE=2 SV=2	PREDICTED: 60S ribosomal protein L8-like [Strongylocentrotus purpuratus]
c75593.graph_c0	5.16309	0	2.17049e-06	4.49214	up	--	--	Molecular Function: structural constituent of ribosome (GO:0003735);; Cellular Component: ribosome (GO:0005840);; Biological Process: translation (GO:0006412);;	K02971|8e-53|xla:446759|rps21, MGC80094	[J]	Translation, ribosomal structure and biogenesis	Ribosomal protein S21e	40S ribosomal protein S21 GN=RpS21 OS=Biphyllus lunatus (Beetle) PE=3 SV=1	PREDICTED: 40S ribosomal protein S21-like isoform X2 [Aplysia californica]
c75594.graph_c0	4.94945	0	0	5.93575	up	[J]	Translation, ribosomal structure and biogenesis	Molecular Function: translation initiation factor activity (GO:0003743);; Biological Process: translational initiation (GO:0006413);;	K03113|4e-57|ptr:454665|EIF1	[J]	Translation, ribosomal structure and biogenesis	Translation initiation factor SUI1	Protein translation factor SUI1 homolog GN=AGAP006459 OS=Anopheles gambiae (African malaria mosquito) PE=3 SV=1	PREDICTED: protein translation factor SUI1 homolog [Metaseiulus occidentalis]
c75596.graph_c0	2.90773	0.0544487	3.33067e-16	4.79178	up	--	--	--	--	[T]	Signal transduction mechanisms	Apoptosis regulator proteins, Bcl-2 family	--	hypothetical protein LOTGIDRAFT_234736 [Lottia gigantea]
c75598.graph_c0	0	4.94736	0	-6.0724	down	--	--	--	--	--	--	Protease inhibitor/seed storage/LTP family;; Probable lipid transfer	--	putative non-specific lipid transfer protein, partial [Hirudo medicinalis]
c75602.graph_c0	6.21891	0.115158	2.22045e-16	4.80766	up	[J]	Translation, ribosomal structure and biogenesis	Molecular Function: structural constituent of ribosome (GO:0003735);; Biological Process: translation (GO:0006412);; Cellular Component: large ribosomal subunit (GO:0015934);;	K02872|1e-137|dre:560828|rpl13a, MGC56275, hm:zehp0384, wu:fa95e06, wu:fb08g07, wu:fd05d08	[J]	Translation, ribosomal structure and biogenesis	Ribosomal protein L13	60S ribosomal protein L13a GN=RpL13A OS=Choristoneura parallela (Spotted fireworm moth) PE=2 SV=1	ribosomal protein rpl13a [Eurythoe complanata]
c75606.graph_c0	0	4.66274	0	-6.24791	down	--	--	Cellular Component: photosystem I (GO:0009522);; Cellular Component: plastid (GO:0009536);; Biological Process: cellular process (GO:0009987);;	--	--	--	PsaD	Putative uncharacterized protein DDB_G0290521 (Precursor) GN=DDB_G0290521 OS=Dictyostelium discoideum (Slime mold) PE=3 SV=2	photosystem I protein PsaD [Bigelowiella natans]
c75609.graph_c0	6.10418	0	0	6.33211	up	[J]	Translation, ribosomal structure and biogenesis	Molecular Function: translation elongation factor activity (GO:0003746);; Molecular Function: translation release factor activity (GO:0003747);; Molecular Function: guanyl-nucleotide exchange factor activity (GO:0005085);; Cellular Component: lipid particle (GO:0005811);; Cellular Component: cytosol (GO:0005829);; Cellular Component: eukaryotic translation elongation factor 1 complex (GO:0005853)…	K03232|1e-131|dre:335370|eef1b2, MGC86802, fj06d02, wu:fj06d02, zgc:56277, zgc:86802	[K]	Transcription	EF-1 guanine nucleotide exchange domain;; Eukaryotic elongation factor 1 beta central acidic region	Probable elongation factor 1-beta GN=Ef1beta OS=Drosophila melanogaster (Fruit fly) PE=1 SV=3	hypothetical protein BRAFLDRAFT_125603 [Branchiostoma floridae]
c75610.graph_c0	4.16064	0.108344	7.1644e-06	3.8417	up	[J]	Translation, ribosomal structure and biogenesis	Molecular Function: RNA binding (GO:0003723);; Molecular Function: structural constituent of ribosome (GO:0003735);; Biological Process: translation (GO:0006412);; Cellular Component: small ribosomal subunit (GO:0015935);;	K02958|3e-82|dre:337148|rps15, MGC103714, wu:fa93f04, wu:fa99b07, zgc:103714, zgc:92743	[J]	Translation, ribosomal structure and biogenesis	Ribosomal protein S19	40S ribosomal protein S15 OS=Caenorhabditis elegans PE=1 SV=3	predicted protein [Nematostella vectensis]
c75615.graph_c0	0	2.78866	0	-6.15607	down	[C]	Energy production and conversion	Molecular Function: catalytic activity (GO:0003824);;	K11517|1e-140|dre:402827|hao1	[C]	Energy production and conversion	FMN-dependent dehydrogenase;; IMP dehydrogenase / GMP reductase domain;; Nitronate monooxygenase;; Conserved region in glutamate synthase	Hydroxyacid oxidase GN=haox OS=Dictyostelium discoideum (Slime mold) PE=3 SV=1	PREDICTED: hydroxyacid oxidase 1-like [Saccoglossus kowalevskii]
c75617.graph_c0	0	3.51811	0	-6.12872	down	--	--	--	--	--	--	PsbP	--	photosystem II protein PsbP [Bigelowiella natans]
c75621.graph_c0	4.88824	0.169721	1.61664e-08	3.91991	up	[J]	Translation, ribosomal structure and biogenesis	Molecular Function: structural constituent of ribosome (GO:0003735);; Cellular Component: ribosome (GO:0005840);; Biological Process: translational elongation (GO:0006414);;	K02942|1e-51|dre:336719|rplp1, MGC77776, fa93f02, wu:fa93f02, zgc:77776	[J]	Translation, ribosomal structure and biogenesis	60s Acidic ribosomal protein	60S acidic ribosomal protein P1 OS=Artemia salina (Brine shrimp) PE=1 SV=2	PREDICTED: 60S acidic ribosomal protein P1-like [Saccoglossus kowalevskii]
c75629.graph_c0	0	4.33246	0	-6.43818	down	--	--	--	--	--	--	Chlorophyll A-B binding protein	--	chlorophyll a/b binding protein CP29 [Gymnochlora stellata]
c75630.graph_c0	3.09326	0	1.06045e-09	5.02414	up
c75633.graph_c0	5.1823	0	0	5.86654	up	--	--	--	K05765|1e-27|dre:403001|cfl2, MGC77288, zgc:77288	[Z]	Cytoskeleton	Cofilin/tropomyosin-type actin-binding protein	Cofilin/actin-depolymerizing factor homolog 2 {ECO:0000303|PubMed:15975905} OS=Plasmodium falciparum (isolate HB3) PE=2 SV=1	hypothetical protein HELRODRAFT_167462 [Helobdella robusta]
c75636.graph_c0	3.61401	0.070035	2.30797e-08	4.25247	up	[J]	Translation, ribosomal structure and biogenesis	Biological Process: mitotic spindle elongation (GO:0000022);; Molecular Function: structural constituent of ribosome (GO:0003735);; Biological Process: translation (GO:0006412);; Cellular Component: cytosolic large ribosomal subunit (GO:0022625);; Biological Process: centrosome duplication (GO:0051298);;	K02889|1e-108|dre:336568|rpl21, wu:fb13h07, wu:fc74e02, zgc:86669	[J]	Translation, ribosomal structure and biogenesis	Ribosomal protein L21e	60S ribosomal protein L21 (Fragment) GN=RPL21 OS=Pyura stolonifera (Sea squirt) PE=2 SV=2	ribosomal protein rpl21 [Eurythoe complanata]
c75646.graph_c0	2.28683	0	4.40538e-08	4.78252	up
c75653.graph_c0	0	4.32622	0	-6.46029	down	--	--	--	--	--	--	Chlorophyll A-B binding protein	--	light harvesting complex protein LHCII-1 [Gymnochlora stellata]
c75659.graph_c0	3.99417	0.0811775	6.38809e-08	4.18596	up	[K]	Transcription	Molecular Function: nucleic acid binding (GO:0003676);; Cellular Component: ribonucleoprotein complex (GO:0030529);;	K11087|2e-79|dre:192331|snrpd1, CHUNP6882, fk26a01, snprd1, snrnpd1, wu:fk26a01, zgc:86929	[A]	RNA processing and modification	LSM domain	Probable small nuclear ribonucleoprotein Sm D1 GN=SmD1 OS=Drosophila melanogaster (Fruit fly) PE=1 SV=1	hypothetical protein BRAFLDRAFT_264344 [Branchiostoma floridae]
c75666.graph_c0	3.1383	0	3.02513e-09	4.95913	up	--	--	--	--	--	--	Stress responsive A/B Barrel Domain	--	--
c75679.graph_c0	0	4.13332	7.68619e-12	-5.36381	down	--	--	--	--	--	--	Photosystem I reaction centre subunit IV / PsaE	Uncharacterized protein DDB_G0284459 GN=DDB_G0284459 OS=Dictyostelium discoideum (Slime mold) PE=4 SV=1	photosystem I protein PsaE [Bigelowiella natans]
c75682.graph_c0	4.74176	0.32927	2.9481e-05	3.15521	up	[J]	Translation, ribosomal structure and biogenesis	Molecular Function: structural constituent of ribosome (GO:0003735);; Cellular Component: ribosome (GO:0005840);; Biological Process: translation (GO:0006412);;	K02949|1e-67|oaa:100085634|hypothetical protein LOC100085634	[J]	Translation, ribosomal structure and biogenesis	Ribosomal protein S17	40S ribosomal protein S11 GN=RpS11 OS=Anopheles gambiae (African malaria mosquito) PE=2 SV=2	40S ribosomal protein S11 [Caligus clemensi]
c75684.graph_c0	0	4.09712	1.09468e-10	-5.21569	down
c75700.graph_c0	0	3.24906	0	-5.98359	down	--	--	--	--	--	--	Chlorophyll A-B binding protein	--	light harvesting complex protein LHCII-3 [Gymnochlora stellata]
c75712.graph_c0	1.99536	0	6.00187e-13	5.43603	up	[L]	Replication, recombination and repair	Molecular Function: DNA binding (GO:0003677);; Molecular Function: ATP binding (GO:0005524);; Biological Process: DNA replication (GO:0006260);; Molecular Function: nucleoside-triphosphatase activity (GO:0017111);;	K10755|0.0|dre:503748|rfc2, zgc:110810	[L]	Replication, recombination and repair	Replication factor C C-terminal domain;; ATPase family associated with various cellular activities (AAA);; DNA polymerase III, delta subunit;; AAA domain;; AAA domain;; AAA ATPase domain;; Part of AAA domain;; Magnesium chelatase, subunit ChlI;; Viral (Superfamily 1) RNA helicase;; Rad17 cell cycle checkpoint protein;; DEAD/DEAH box helicase;; Holliday junction DNA helicase ruvB N-terminus	Replication factor C subunit 2 GN=RfC4 OS=Drosophila melanogaster (Fruit fly) PE=2 SV=1	hypothetical protein BRAFLDRAFT_123856 [Branchiostoma floridae]
c75718.graph_c0	3.90583	0	4.40538e-08	4.78252	up	[J]	Translation, ribosomal structure and biogenesis	Molecular Function: structural constituent of ribosome (GO:0003735);; Cellular Component: ribosome (GO:0005840);; Biological Process: translation (GO:0006412);;	K02910|2e-80|tgu:100189948|ribosomal protein L31-like	[J]	Translation, ribosomal structure and biogenesis	Ribosomal protein L31e	60S ribosomal protein L31 GN=RpL31 OS=Spodoptera frugiperda (Fall armyworm) PE=2 SV=1	ribosomal protein L31 [Riptortus pedestris]
c75721.graph_c0	0	3.70848	0	-6.05798	down	--	--	--	--	--	--	Photosystem I reaction centre subunit XI	--	--
c75735.graph_c0	3.07424	0.0376723	1.63869e-13	4.8969	up	[O]	Posttranslational modification, protein turnover, chaperones	Molecular Function: oxidoreductase activity (GO:0016491);; Biological Process: oxidation-reduction process (GO:0055114);;	K11187|4e-80|hsa:25824|PRDX5, ACR1, AOEB166, B166, MGC117264, MGC142283, MGC142285, PLP, PMP20, PRDX6, PRXV	[O]	Posttranslational modification, protein turnover, chaperones	Redoxin;; AhpC/TSA family	--	peroxiredoxin 5 [Arenicola marina]
c75740.graph_c0	4.20015	0	1.35339e-10	5.14597	up	--	--	--	K08731|1e-64|dre:246726|birc5b, MGC123152, bir5b	[DR]	--	Inhibitor of Apoptosis domain	Apoptosis 2 inhibitor GN=Iap2 OS=Drosophila melanogaster (Fruit fly) PE=2 SV=3	hypothetical protein LOTGIDRAFT_229109 [Lottia gigantea]
c75743.graph_c0	0	3.83204	3.2323e-12	-5.40998	down	--	--	--	--	--	--	Photosystem II reaction centre X protein (PsbX)	--	DHHC zinc finger domain-containing protein [Toxoplasma gondii GT1]
c75744.graph_c0	0	3.30314	5.8753e-13	-5.49812	down	--	--	--	--	--	--	Late embryogenesis abundant protein	--	--
c75745.graph_c0	0	3.9068	1.71917e-10	-5.18946	down	--	--	--	--	--	--	Photosystem II 10 kDa polypeptide PsbR	--	photosystem II protein PSII10 [Bigelowiella natans]
c75748.graph_c0	3.12344	0.0147046	0	6.25907	up	[G]	Carbohydrate transport and metabolism	Molecular Function: catalytic activity (GO:0003824);; Biological Process: metabolic process (GO:0008152);;	K00615|0.0|dre:378713|tkt, cb860, fb38f03, fj52f12, id:ibd3270, wu:cegs2794, wu:fb38f03, wu:fj52f12	[G]	Carbohydrate transport and metabolism	Transketolase, thiamine diphosphate binding domain;; Transketolase, pyrimidine binding domain;; Transketolase, C-terminal domain;; Dehydrogenase E1 component;; 1-deoxy-D-xylulose-5-phosphate synthase;; Thiamine pyrophosphate enzyme, C-terminal TPP binding domain	Transketolase GN=tkt-2 OS=Dictyostelium discoideum (Slime mold) PE=1 SV=1	hypothetical protein CAPTEDRAFT_157209 [Capitella teleta]
c75751.graph_c0	0	1.99869	3.23075e-14	-5.64049	down	[IQR]	--	--	--	[Q]	Secondary metabolites biosynthesis, transport and catabolism	short chain dehydrogenase;; KR domain;; NAD(P)H binding domain of trans-2-enoyl-CoA reductase	WW domain-containing oxidoreductase GN=Wwox OS=Drosophila melanogaster (Fruit fly) PE=2 SV=1	NADPH protochlorophyllide reductase [Bigelowiella natans]
c75753.graph_c0	0.0568495	1.46853	6.67335e-05	-3.66379	down
c75754.graph_c0	0	2.74749	1.09468e-10	-5.21569	down	[J]	Translation, ribosomal structure and biogenesis	Cellular Component: ribonucleoprotein complex (GO:0030529);;	K02951|1e-49|spu:590740|similar to 40S ribosomal protein S12	[J]	Translation, ribosomal structure and biogenesis	Ribosomal protein L7Ae/L30e/S12e/Gadd45 family	40S ribosomal protein S12 GN=RpS12 OS=Drosophila melanogaster (Fruit fly) PE=1 SV=2	hypothetical protein D910_01957 [Dendroctonus ponderosae]
c75758.graph_c0	0	2.19633	1.44329e-14	-5.67871	down	--	--	--	--	--	--	Peroxidase	--	glutathione peroxidase-like protein [Crassostrea ariakensis]
c75766.graph_c0	1.97033	0.0469098	1.44827e-06	3.96581	up	[C]	Energy production and conversion	Molecular Function: ATP binding (GO:0005524);; Biological Process: ATP synthesis coupled proton transport (GO:0015986);; Biological Process: ATP hydrolysis coupled proton transport (GO:0015991);; Cellular Component: proton-transporting ATP synthase complex, catalytic core F(1) (GO:0045261);; Molecular Function: proton-transporting ATP synthase activity, rotational mechanism (GO:0046933);; Molecul…	K02132|1e-156|dre:553755|atp5a1, zgc:154103	[C]	Energy production and conversion	ATP synthase alpha/beta family, beta-barrel domain;; ATP synthase alpha/beta family, nucleotide-binding domain	ATP synthase subunit alpha, mitochondrial (Precursor) GN=blw OS=Drosophila melanogaster (Fruit fly) PE=1 SV=2	ATP synthase alpha subunit mitochondrial [Anopheles darlingi]
c75771.graph_c0	3.43494	0.0733919	1.78781e-07	4.11625	up	[J]	Translation, ribosomal structure and biogenesis	Cellular Component: ribosome (GO:0005840);;	K02896|1e-97|dre:192301|rpl24, chunp6908, wu:fa93e03	[J]	Translation, ribosomal structure and biogenesis	Ribosomal protein L24e	60S ribosomal protein L24 GN=RPL24 OS=Branchiostoma belcheri (Amphioxus) PE=2 SV=1	RecName: Full=60S ribosomal protein L24 [Branchiostoma belcheri]
c75772.graph_c0	4.14087	0.202972	1.61602e-05	3.43909	up	[J]	Translation, ribosomal structure and biogenesis	Molecular Function: structural constituent of ribosome (GO:0003735);; Cellular Component: ribosome (GO:0005840);; Biological Process: translation (GO:0006412);;	K02915|4e-78|tgu:100190103|ribosomal protein L34-like	[J]	Translation, ribosomal structure and biogenesis	Ribosomal protein L34e	60S ribosomal protein L34 GN=rpl34 OS=Dictyostelium discoideum (Slime mold) PE=3 SV=1	ribosomal protein L34 [Branchiostoma belcheri tsingtauense]
c75780.graph_c0	2.63049	0.210764	3.63289e-07	3.1379	up	--	--	Molecular Function: glutathione transferase activity (GO:0004364);; Biological Process: metabolic process (GO:0008152);;	K00799|1e-136|dre:324366|gstm, cb760, wu:fc26g06, zgc:66370	[O]	Posttranslational modification, protein turnover, chaperones	Glutathione S-transferase, N-terminal domain;; Glutathione S-transferase, C-terminal domain;; Glutathione S-transferase, C-terminal domain	Glutathione S-transferase class-mu 26 kDa isozyme 51 OS=Fasciola hepatica (Liver fluke) PE=1 SV=3	hypothetical protein BRAFLDRAFT_72748 [Branchiostoma floridae]
c75781.graph_c0	0	2.40596	1.81511e-08	-4.89697	down	--	--	--	--	--	--	Chlorophyll A-B binding protein	--	putative chlorophyll a/b binding protein, partial [Hirudo medicinalis]
c75783.graph_c0	2.94067	0.219909	1.813e-10	3.32287	up	--	--	--	--	--	--	Zona pellucida-like domain	--	Oncoprotein-induced transcript 3 protein [Crassostrea gigas]
c75786.graph_c0	3.67587	0.204203	0.000125775	3.26608	up	--	--	--	K02129|7e-37|dre:767750|atp5ib, MGC153661, atp5i, zgc:153661	[C]	Energy production and conversion	ATP synthase E chain	--	ATP synthase e chain, putative [Pediculus humanus corporis]
c75787.graph_c0	0	2.71976	1.33227e-15	-5.78765	down	--	--	--	--	--	--	Chlorophyll A-B binding protein	--	chlorophyll a/b binding protein CP29 [Gymnochlora stellata]
c75794.graph_c0	0	3.03645	8.96838e-13	-5.47659	down	[O]	Posttranslational modification, protein turnover, chaperones	Molecular Function: ubiquitin-protein ligase activity (GO:0004842);; Biological Process: protein ubiquitination (GO:0016567);;	K10573|5e-89|isc:IscW_ISCW009979|ubiquitin protein ligase, putative (EC:6.3.2.19)	[O]	Posttranslational modification, protein turnover, chaperones	Ubiquitin-conjugating enzyme;; Prokaryotic E2 family B	Ubiquitin-conjugating enzyme E2 2 GN=ubc2 OS=Dictyostelium discoideum (Slime mold) PE=3 SV=2	ubiquitin-conjugating enzyme E2-17 kDa [Dictyostelium purpureum]
c75797.graph_c0	0	4.00033	1.67533e-13	-5.56086	down	--	--	--	--	--	--	Photosystem II reaction centre W protein (PsbW)	--	photosystem II reaction center W protein [Gymnochlora stellata]
c75801.graph_c0	2.93453	0	1.22009e-05	4.34724	up	--	--	--	--	[S]	Function unknown	Uncharacterized conserved protein (DUF2340)	UPF0538 protein GN=DDB_G0283523 OS=Dictyostelium discoideum (Slime mold) PE=3 SV=1	UPF0538 protein C2orf76-like protein [Crassostrea gigas]
c75811.graph_c0	3.28254	0	2.5609e-08	4.81961	up	--	--	Molecular Function: structural constituent of ribosome (GO:0003735);; Cellular Component: ribosome (GO:0005840);; Biological Process: translation (GO:0006412);;	K02983|2e-74|dre:393710|fau, MGC73171, zgc:73171	[JO]	--	Ribosomal protein S30;; Ubiquitin family	40S ribosomal protein S30 GN=RPS30 OS=Plasmodium falciparum (isolate 3D7) PE=1 SV=1	putative ubiquitin-like protein Fubi/40S ribosomal protein RPS30 fusion protein [Novocrania anomala]
c75812.graph_c0	1.97152	0.0342258	1.89901e-09	4.40643	up	[G]	Carbohydrate transport and metabolism	Molecular Function: lyase activity (GO:0016829);;	--	[G]	Carbohydrate transport and metabolism	Fructose-bisphosphate aldolase class-I	Fructose-bisphosphate aldolase GN=fba OS=Dictyostelium discoideum (Slime mold) PE=3 SV=1	class I fructose-1,6-bisphosphate aldolase [Chromera velia]
c75814.graph_c0	2.95361	0.153825	4.49026e-05	3.35518	up	[J]	Translation, ribosomal structure and biogenesis	Molecular Function: structural constituent of ribosome (GO:0003735);; Biological Process: translation (GO:0006412);; Cellular Component: small ribosomal subunit (GO:0015935);;	K02973|1e-101|dre:100000341|rps23	[J]	Translation, ribosomal structure and biogenesis	Ribosomal protein S12/S23	40S ribosomal protein S23 GN=RPS23 OS=Lumbricus rubellus (Humus earthworm) PE=2 SV=1	40S ribosomal protein S23 [Sycon ciliatum]
c75825.graph_c0	2.9652	0	9.99201e-16	5.73681	up	[O]	Posttranslational modification, protein turnover, chaperones	Biological Process: nematode larval development (GO:0002119);; Molecular Function: ubiquitin-protein ligase activity (GO:0004842);; Cellular Component: microtubule associated complex (GO:0005875);; Biological Process: apoptotic process (GO:0006915);; Biological Process: mitosis (GO:0007067);; Biological Process: male meiosis (GO:0007140);; Biological Process: spermatid development (GO:0007286);; …	K06689|7e-98|bfo:BRAFLDRAFT_285353|hypothetical protein	[O]	Posttranslational modification, protein turnover, chaperones	Ubiquitin-conjugating enzyme	Ubiquitin-conjugating enzyme E2-17 kDa GN=eff OS=Drosophila melanogaster (Fruit fly) PE=2 SV=1	hypothetical protein BRAFLDRAFT_285353 [Branchiostoma floridae]
c75830.graph_c0	2.79012	0.0374995	0	5.26395	up	--	--	Biological Process: very long-chain fatty acid metabolic process (GO:0000038);; Biological Process: fatty acid biosynthetic process (GO:0006633);;	K10250|1e-159|dre:327274|elovl7b, elovl1, wu:fd20a06, zgc:56422	[I]	Lipid transport and metabolism	GNS1/SUR4 family	Elongation of very long chain fatty acids protein AAEL008004 GN=AAEL008004 OS=Aedes aegypti (Yellowfever mosquito) PE=2 SV=2	hypothetical protein LOTGIDRAFT_165788 [Lottia gigantea]
c75834.graph_c0	0	2.26242	1.10689e-13	-5.58119	down	[G]	Carbohydrate transport and metabolism	--	--	[G]	Carbohydrate transport and metabolism	Major intrinsic protein	Aquaporin AQPcic GN=AQP OS=Cicadella viridis (Green leafhopper) PE=1 SV=1	hypothetical protein BRAFLDRAFT_200165 [Branchiostoma floridae]
c75836.graph_c0	0	3.19502	4.35881e-09	-4.9911	down	[P]	Inorganic ion transport and metabolism	--	--	[P]	Inorganic ion transport and metabolism	Heavy-metal-associated domain	Copper transport protein ATOX1 homolog GN=atox1 OS=Dictyostelium discoideum (Slime mold) PE=3 SV=2	antioxidant enzyme [Culex quinquefasciatus]
c75839.graph_c0	0	3.02483	8.88178e-16	-5.80504	down	--	--	--	--	--	--	Chlorophyll A-B binding protein	--	light harvesting complex protein LHCII-3 [Gymnochlora stellata]
c75843.graph_c0	2.50535	0.0463928	8.43029e-09	4.31604	up	--	--	Biological Process: single-organism cellular process (GO:0044763);;	--	--	--	RTP801 C-terminal region	Protein scylla GN=scyl OS=Drosophila melanogaster (Fruit fly) PE=2 SV=1	GJ11278 [Drosophila virilis]
c75846.graph_c0	0.026039	2.25659	0	-5.36272	down	[O]	Posttranslational modification, protein turnover, chaperones	Molecular Function: binding (GO:0005488);;	K09502|1e-157|tca:660093|similar to DnaJ homolog subfamily A member 1 (Heat shock 40 kDa protein 4) (DnaJ protein homolog 2) (HSJ-2) (HSDJ)	[O]	Posttranslational modification, protein turnover, chaperones	DnaJ domain;; DnaJ C terminal domain;; DnaJ central domain	DnaJ homolog subfamily A member 1 homolog (Precursor) GN=dnaja1 OS=Dictyostelium discoideum (Slime mold) PE=3 SV=1	PREDICTED: dnaJ homolog subfamily A member 1 [Tribolium castaneum]
c75849.graph_c0	2.14942	0	1.23016e-06	4.53737	up	--	--	Cellular Component: nucleus (GO:0005634);; Biological Process: single-organism cellular process (GO:0044763);;	--	[KT]	--	Ubinuclein conserved middle domain	Yemanuclein-alpha GN=yemalpha OS=Drosophila melanogaster (Fruit fly) PE=1 SV=1	PREDICTED: ubinuclein-2-like [Aplysia californica]
c75857.graph_c0	2.8171	0.0545917	2.30797e-08	4.25247	up	[J]	Translation, ribosomal structure and biogenesis	Molecular Function: structural constituent of ribosome (GO:0003735);; Cellular Component: ribosome (GO:0005840);; Biological Process: translation (GO:0006412);;	K02866|1e-157|dre:336712|rpl10, QM, fa93d03, rpl-10, wu:fa93d03, zgc:56154	[J]	Translation, ribosomal structure and biogenesis	Ribosomal protein L16p/L10e	60S ribosomal protein L10 GN=RpL10 OS=Drosophila melanogaster (Fruit fly) PE=1 SV=1	60S ribosomal protein L10, putative [Ixodes scapularis]
c75859.graph_c0	2.22968	0	1.4938e-08	4.85578	up	--	--	--	--	--	--	--	--	putative kinesin K39 [Leishmania major strain Friedlin]
c75868.graph_c0	0	2.68867	6.98795e-11	-5.24146	down	--	--	--	--	--	--	Photosystem I reaction centre subunit N (PSAN or PSI-N)	--	--
c75870.graph_c0	2.11025	0.0450881	1.78781e-07	4.11625	up	[O]	Posttranslational modification, protein turnover, chaperones	Molecular Function: threonine-type endopeptidase activity (GO:0004298);; Cellular Component: nucleus (GO:0005634);; Cellular Component: cytoplasm (GO:0005737);; Biological Process: ubiquitin-dependent protein catabolic process (GO:0006511);; Cellular Component: proteasome core complex, alpha-subunit complex (GO:0019773);;	K02730|1e-169|dre:436862|zgc:92716 (EC:3.4.25.1)	[O]	Posttranslational modification, protein turnover, chaperones	Proteasome subunit;; Proteasome subunit A N-terminal signature	Proteasome subunit alpha type-6 GN=Prosalpha1 OS=Drosophila melanogaster (Fruit fly) PE=1 SV=2	PREDICTED: proteasome subunit alpha type-6-like [Saccoglossus kowalevskii]
c75873.graph_c0	0	2.26903	9.54792e-15	-5.69745	down	[R]	General function prediction only	--	--	[QR]	--	2OG-Fe(II) oxygenase superfamily;; non-haem dioxygenase in morphine synthesis N-terminal	Probable iron/ascorbate oxidoreductase DDB_G0283291 GN=DDB_G0283291 OS=Dictyostelium discoideum (Slime mold) PE=3 SV=1	putative thymine-7-hydroxylase [Leishmania major strain Friedlin]
c75875.graph_c0	2.62606	0	3.99625e-07	4.6238	up	[J]	Translation, ribosomal structure and biogenesis	Molecular Function: structural constituent of ribosome (GO:0003735);; Cellular Component: ribosome (GO:0005840);; Biological Process: translation (GO:0006412);;	K02882|1e-125|dre:394035|rpl18a, MGC56546, rpl-20Co, zgc:56546	[J]	Translation, ribosomal structure and biogenesis	Ribosomal L18ae/LX protein domain	60S ribosomal protein L18a GN=RpL18A OS=Spodoptera frugiperda (Fall armyworm) PE=2 SV=1	hypothetical protein CAPTEDRAFT_150312 [Capitella teleta]
c75876.graph_c0	0	2.39147	0	-6.05798	down	[G]	Carbohydrate transport and metabolism	Biological Process: metabolic process (GO:0008152);; Molecular Function: oxidoreductase activity (GO:0016491);;	K00134|3e-93|cin:100186457|similar to Glyceraldehyde-3-phosphate dehydrogenase (GAPDH)	[G]	Carbohydrate transport and metabolism	Glyceraldehyde 3-phosphate dehydrogenase, C-terminal domain;; Glyceraldehyde 3-phosphate dehydrogenase, NAD binding domain	Glyceraldehyde-3-phosphate dehydrogenase, cytosolic OS=Trypanosoma brucei brucei PE=1 SV=3	PREDICTED: glyceraldehyde-3-phosphate dehydrogenase, chromosomal-like [Amphimedon queenslandica]
c75877.graph_c0	2.84666	0	0	6.34489	up	--	--	Biological Process: cell cycle (GO:0007049);;	K04503|1e-148|dre:30222|ccnd1, cb161, cycd1, etID37810.7, fb52e01, fc83a12, id:ibd1198, wu:fb52e01, wu:fc83a12	[D]	Cell cycle control, cell division, chromosome partitioning	Cyclin, N-terminal domain;; Cyclin, C-terminal domain	G2/mitotic-specific cyclin-A (Fragment) OS=Hydra viridissima (Green hydra) PE=2 SV=1	hypothetical protein BRAFLDRAFT_271951 [Branchiostoma floridae]
c75885.graph_c0	1.82658	0	1.23016e-06	4.53737	up	--	--	Biological Process: oocyte maturation (GO:0001556);; Molecular Function: DNA binding (GO:0003677);; Molecular Function: RNA binding (GO:0003723);; Cellular Component: nucleoplasm (GO:0005654);; Biological Process: primary metabolic process (GO:0044238);; Biological Process: cellular macromolecule metabolic process (GO:0044260);;	K11276|4e-45|dre:266985|npm1, sb:cb487	--	--	--	Nucleoplasmin-like protein ANO39 OS=Patiria pectinifera (Starfish) PE=1 SV=1	PREDICTED: nucleoplasmin-like protein ANO39-like isoform X1 [Saccoglossus kowalevskii]
c75890.graph_c0	1.88453	0.0413251	3.00343e-07	4.08008	up	--	--	--	--	--	--	Ovarian carcinoma immunoreactive antigen (OCIA)	OCIA domain-containing protein 1 GN=asrij OS=Drosophila melanogaster (Fruit fly) PE=2 SV=1	PREDICTED: OCIA domain-containing protein 1-like [Strongylocentrotus purpuratus]
c75892.graph_c0	2.53859	0	9.08162e-14	5.52855	up	--	--	--	--	[S]	Function unknown	Anticodon-binding domain	Protein LSM12 homolog A GN=CG15735 OS=Drosophila melanogaster (Fruit fly) PE=2 SV=2	PREDICTED: protein LSM12 homolog [Saccoglossus kowalevskii]
c75897.graph_c0	3.37802	0	6.99841e-07	4.58123	up
c75909.graph_c0	0	2.75602	6.99285e-09	-4.9604	down	--	--	--	--	--	--	Hydrophobic seed protein	--	--
c75910.graph_c0	3.075	0	2.29034e-07	4.66515	up	[J]	Translation, ribosomal structure and biogenesis	Molecular Function: structural constituent of ribosome (GO:0003735);; Cellular Component: ribosome (GO:0005840);; Biological Process: translation (GO:0006412);;	K02883|1e-107|dre:445038|fa98d03, wu:fa98d03	[J]	Translation, ribosomal structure and biogenesis	Ribosomal protein L18e/L15	60S ribosomal protein L18 GN=RpL18 OS=Ixodes scapularis (Black-legged tick) PE=2 SV=1	PREDICTED: 60S ribosomal protein L18 isoform X1 [Ciona intestinalis]
c75931.graph_c0	0.0608749	1.62324	4.08861e-05	-3.70752	down	[J]	Translation, ribosomal structure and biogenesis	Molecular Function: structural constituent of ribosome (GO:0003735);; Cellular Component: ribosome (GO:0005840);; Biological Process: translation (GO:0006412);;	K02885|1e-88|tad:TRIADDRAFT_64417|expressed hypothetical protein	[J]	Translation, ribosomal structure and biogenesis	Ribosomal protein L19e	60S ribosomal protein L19 GN=RpL19 OS=Drosophila melanogaster (Fruit fly) PE=1 SV=2	expressed hypothetical protein [Trichoplax adhaerens]
c75939.graph_c0	2.85835	0.0193644	0	5.73892	up	--	--	--	--	--	--	Zona pellucida-like domain	--	--
c75960.graph_c0	0	1.78078	9.27156e-07	-4.61101	down	--	--	Biological Process: photosynthesis (GO:0015979);;	--	--	--	Chlorophyll A-B binding protein	--	light-harvesting complex protein LHCG11 [Bigelowiella natans]
c75961.graph_c0	2.14942	0	1.23016e-06	4.53737	up	--	--	--	--	--	--	MAPEG family	--	predicted protein [Nematostella vectensis]
c75977.graph_c0	0	3.20253	4.47199e-11	-5.26677	down	--	--	--	--	--	--	Photosystem I reaction centre subunit VI	--	--
c75978.graph_c0	1.72333	0.0683822	2.95648e-07	3.73307	up	--	--	--	--	--	--	Alcohol dehydrogenase transcription factor Myb/SANT-like	Transcription factor Adf-1 GN=Adf1 OS=Drosophila melanogaster (Fruit fly) PE=2 SV=2	PREDICTED: transcription factor Adf-1-like [Tribolium castaneum]
c75989.graph_c0	0	2.29012	7.1433e-06	-4.44352	down	[C]	Energy production and conversion	Molecular Function: electron carrier activity (GO:0009055);; Cellular Component: apicoplast (GO:0020011);; Biological Process: electron transport chain (GO:0022900);; Molecular Function: metal ion binding (GO:0046872);; Molecular Function: 2 iron, 2 sulfur cluster binding (GO:0051537);;	--	--	--	2Fe-2S iron-sulfur cluster binding domain	--	ferredoxin 1 [Bigelowiella natans]
c75998.graph_c0	0	2.33399	3.4052e-07	-4.68799	down	--	--	--	--	--	--	Photosystem I reaction centre subunit N (PSAN or PSI-N)	--	--
c75999.graph_c0	1.54263	0	1.3174e-07	4.70534	up
c76009.graph_c0	2.62792	0.0842234	0.000189235	3.55598	up	[O]	Posttranslational modification, protein turnover, chaperones	--	K12160|7e-61|dre:436950|sumo3b, fc66f10, fl11h12, sumo3, wu:fc66f10, wu:fl11h12, zgc:86902	[O]	Posttranslational modification, protein turnover, chaperones	Ubiquitin-2 like Rad60 SUMO-like;; Ubiquitin family	Small ubiquitin-related modifier (Precursor) GN=smo-1 OS=Caenorhabditis elegans PE=1 SV=1	conserved hypothetical protein [Ixodes scapularis]
c76025.graph_c0	0	1.93654	2.55676e-06	-4.52969	down	--	--	--	--	--	--	Photosystem I reaction centre subunit III	--	photosystem I protein PsaF [Bigelowiella natans]
c76029.graph_c0	1.78242	0.0873683	1.61602e-05	3.43909	up	--	--	--	K11586|2e-89|dre:751689|cbx3a, MGC153397, cbx3, wu:fb61b02, zgc:153397	[B]	Chromatin structure and dynamics	Chromo shadow domain;; Chromo (CHRromatin Organisation MOdifier) domain	Heterochromatin protein 1 GN=Su(var)205 OS=Drosophila melanogaster (Fruit fly) PE=1 SV=2	PREDICTED: chromobox protein homolog 3-like [Megachile rotundata]
c76051.graph_c0	0.0958019	2.55457	4.08861e-05	-3.70752	down	[H]	Coenzyme transport and metabolism	--	--	[R]	General function prediction only	Thi4 family	--	putative thiazole biosynthetic enzyme, partial [Hirudo medicinalis]
c76053.graph_c0	0	2.41142	2.55676e-06	-4.52969	down	--	--	--	--	--	--	Photosystem II reaction centre X protein (PsbX)	--	--
c76057.graph_c0	1.37502	0.0498165	4.22069e-08	3.86028	up	--	--	Molecular Function: calcium ion binding (GO:0005509);;	--	[T]	Signal transduction mechanisms	EF hand;; EF-hand domain pair;; EF-hand domain;; EF-hand domain pair;; EF hand	Sorcin OS=Schistosoma japonicum (Blood fluke) PE=2 SV=1	Grancalcin [Caligus clemensi]
c76063.graph_c0	1.50216	0	6.99841e-07	4.58123	up	[D]	Cell cycle control, cell division, chromosome partitioning	Molecular Function: binding (GO:0005488);; Biological Process: cellular process (GO:0009987);; Biological Process: single-organism process (GO:0044699);;	--	[R]	General function prediction only	SUZ-C motif	Formin-A GN=forA OS=Dictyostelium discoideum (Slime mold) PE=1 SV=1	PREDICTED: la-related protein 6-like [Saccoglossus kowalevskii]
c76070.graph_c0	2.31718	0	1.81298e-11	5.25831	up	[C]	Energy production and conversion	Cellular Component: mitochondrial proton-transporting ATP synthase complex, catalytic core F(1) (GO:0000275);; Cellular Component: lipid particle (GO:0005811);; Biological Process: ATP biosynthetic process (GO:0006754);; Biological Process: phagocytosis (GO:0006909);; Molecular Function: hydrogen-exporting ATPase activity, phosphorylative mechanism (GO:0008553);; Biological Process: proton transp…	K02136|1e-171|dre:336957|atp5c1, wu:fk34c05, zgc:73209	[C]	Energy production and conversion	ATP synthase	ATP synthase subunit gamma, mitochondrial (Precursor) GN=ATPsyn-gamma OS=Drosophila melanogaster (Fruit fly) PE=2 SV=2	ATP synthase gamma subunit, putative [Ixodes scapularis]
c76072.graph_c0	0	2.06109	9.27156e-07	-4.61101	down	--	--	--	--	--	--	CP12 domain	--	--
c76078.graph_c0	0	2.44574	7.1433e-06	-4.44352	down	--	--	--	--	[P]	Inorganic ion transport and metabolism	Metallothionein	Metallothionein OS=Crassostrea virginica (Eastern oyster) PE=1 SV=3	hypothetical protein [Trichomonas vaginalis G3]
c76086.graph_c0	1.52828	0.0282998	8.43029e-09	4.31604	up	[D]	Cell cycle control, cell division, chromosome partitioning	--	--	--	--	Cyclin, C-terminal domain;; Cyclin, N-terminal domain	G2/mitotic-specific cyclin-A (Fragment) OS=Hydra viridissima (Green hydra) PE=2 SV=1	PREDICTED: cyclin-J-like [Saccoglossus kowalevskii]
c76110.graph_c0	0	2.16086	4.35881e-09	-4.9911	down	--	--	--	--	--	--	CAAD domains of cyanobacterial aminoacyl-tRNA synthetase	--	--
c76124.graph_c0	1.42534	0	6.83519e-06	4.39717	up	--	--	Biological Process: regulation of muscle contraction (GO:0006937);;	--	[Z]	Cytoskeleton	Troponin	Troponin T GN=TNT OS=Periplaneta americana (American cockroach) PE=2 SV=1	PREDICTED: troponin T, cardiac muscle isoforms isoform X5 [Ciona intestinalis]
c76152.graph_c0	0	1.4694	4.97857e-12	-5.38708	down	[F]	Nucleotide transport and metabolism	Molecular Function: ATP binding (GO:0005524);; Biological Process: carbohydrate metabolic process (GO:0005975);; Molecular Function: phosphoribulokinase activity (GO:0008974);; Biological Process: phosphorylation (GO:0016310);;	--	[TZ]	--	Phosphoribulokinase / Uridine kinase family	Uridine-cytidine kinase A GN=udkA OS=Dictyostelium discoideum (Slime mold) PE=3 SV=1	chloroplast phosphoribulokinase, partial [Bigelowiella natans]
c76160.graph_c0	2.0278	0	2.33147e-15	5.69749	up	--	--	--	--	[T]	Signal transduction mechanisms	Low-density lipoprotein receptor domain class A;; Coagulation Factor Xa inhibitory site;; Calcium-binding EGF domain	Low-density lipoprotein receptor-related protein (Precursor) GN=lrp-1 OS=Caenorhabditis elegans PE=1 SV=1	PREDICTED: low-density lipoprotein receptor-related protein 8-like [Strongylocentrotus purpuratus]
c76167.graph_c0	0	1.81549	7.68619e-12	-5.36381	down	--	--	--	--	--	--	Peroxidase	Putative ascorbate peroxidase (Precursor) GN=APX1 OS=Hydra viridissima (Green hydra) PE=2 SV=1	glutathione peroxidase-like protein [Crassostrea ariakensis]
c76169.graph_c0	0	2.07977	4.76594e-08	-4.83061	down	--	--	--	--	--	--	Dormancy/auxin associated protein	--	--
c76176.graph_c0	2.37319	0	3.84426e-06	4.44544	up	[G]	Carbohydrate transport and metabolism	Molecular Function: fructose-bisphosphate aldolase activity (GO:0004332);; Biological Process: glycolysis (GO:0006096);;	K01623|1e-129|dre:406496|aldoab, hm:zeh0036, zgc:77696	[G]	Carbohydrate transport and metabolism	Fructose-bisphosphate aldolase class-I	Fructose-bisphosphate aldolase GN=Ald OS=Drosophila melanogaster (Fruit fly) PE=1 SV=5	aldolase class-1 protein [Apostichopus japonicus]
c76196.graph_c0	1.88217	0.0896218	3.85988e-11	3.79829	up
c76201.graph_c0	0.212453	1.46053	0.00235606	-2.57838	down	--	--	--	--	--	--	Oxygen evolving enhancer protein 3 (PsbQ)	--	photosystem II oxygen evolving enhancer protein 3 [Gymnochlora stellata]
c76209.graph_c0	2.78137	0.0827741	6.28363e-05	3.65764	up	[J]	Translation, ribosomal structure and biogenesis	Molecular Function: structural constituent of ribosome (GO:0003735);; Cellular Component: ribosome (GO:0005840);; Biological Process: translation (GO:0006412);; Molecular Function: metal ion binding (GO:0046872);;	K02978|7e-59|ptr:738979|hypothetical protein LOC738979	[J]	Translation, ribosomal structure and biogenesis	Ribosomal protein S27	40S ribosomal protein S27 GN=RPS27 OS=Homarus americanus (American lobster) PE=3 SV=2	ribosomal protein S27 [Branchiostoma belcheri tsingtauense]
c76213.graph_c0	2.17399	0	2.32259e-13	5.48303	up	[R]	General function prediction only	--	K14396|9e-61|dre:406543|pabpn1, MGC171884, MGC173800, MGC92452, fb19c03, wu:fb17e03, wu:fb18c06, wu:fb19c03, zgc:85979, zgc:92452	[A]	RNA processing and modification	RNA recognition motif. (a.k.a. RRM, RBD, or RNP domain);; RNA recognition motif (a.k.a. RRM, RBD, or RNP domain);; RNA recognition motif. (a.k.a. RRM, RBD, or RNP domain)	Polyadenylate-binding protein 2 OS=Drosophila melanogaster (Fruit fly) PE=2 SV=1	PREDICTED: polyadenylate-binding protein 2-like [Hydra vulgaris]
c76218.graph_c0	0	1.73716	5.61004e-07	-4.65001	down	--	--	--	K05759|9e-28|bfo:BRAFLDRAFT_278128|hypothetical protein	[Z]	Cytoskeleton	Profilin	Profilin-1 GN=proA OS=Dictyostelium discoideum (Slime mold) PE=2 SV=1	profilin [Pseudodiaptomus annandalei]
c76224.graph_c0	1.33381	0	1.56741e-12	5.38745	up	[P]	Inorganic ion transport and metabolism	--	K14719|1e-149|dre:368686|slc39a13, MGC136440, ZIP13, si:by184l24.1, si:xx-184l24.1, wu:fa55a07, zgc:136440	[P]	Inorganic ion transport and metabolism	ZIP Zinc transporter	Zinc transporter ZIP13 homolog GN=Zip99C OS=Drosophila melanogaster (Fruit fly) PE=2 SV=1	hypothetical protein CAPTEDRAFT_94046 [Capitella teleta]
c76228.graph_c0	2.10959	0	1.06045e-09	5.02414	up
c76243.graph_c0	1.70074	0	9.08162e-14	5.52855	up	[C]	Energy production and conversion	Molecular Function: magnesium ion binding (GO:0000287);; Molecular Function: isocitrate dehydrogenase (NADP+) activity (GO:0004450);; Biological Process: tricarboxylic acid cycle (GO:0006099);; Biological Process: isocitrate metabolic process (GO:0006102);; Molecular Function: NAD binding (GO:0051287);;	K00031|0.0|dre:386951|idh2, wu:fb33c06, wu:fk31e05, wu:fq43b01, zgc:55485	[C]	Energy production and conversion	Isocitrate/isopropylmalate dehydrogenase	Isocitrate dehydrogenase [NADP], mitochondrial (Precursor) GN=idhM OS=Dictyostelium discoideum (Slime mold) PE=3 SV=1	hypothetical protein BRAFLDRAFT_115608 [Branchiostoma floridae]
c76250.graph_c0	0	2.24572	1.53717e-06	-4.57092	down
c76257.graph_c0	0	2.10533	2.55676e-06	-4.52969	down	--	--	--	--	[P]	Inorganic ion transport and metabolism	Metallothionein	--	hypothetical protein [Trichomonas vaginalis G3]
c76271.graph_c0	0	2.22213	4.27295e-10	-5.13551	down	[C]	Energy production and conversion	Molecular Function: binding (GO:0005488);; Cellular Component: thylakoid (GO:0009579);; Cellular Component: membrane (GO:0016020);; Molecular Function: oxidoreductase activity, acting on diphenols and related substances as donors (GO:0016679);; Cellular Component: intracellular membrane-bounded organelle (GO:0043231);; Cellular Component: cytoplasmic part (GO:0044444);;	K00411|2e-10|nve:NEMVE_v1g212662|hypothetical protein	[C]	Energy production and conversion	Cytochrome B6-F complex Fe-S subunit;; Rieske [2Fe-2S] domain	--	RecName: Full=Cytochrome b6-f complex iron-sulfur subunit, chloroplastic; AltName: Full=Plastohydroquinone:plastocyanin oxidoreductase iron-sulfur protein; AltName: Full=Rieske iron-sulfur protein; Short=ISP; Short=RISP; Flags: Precursor [Bigelowiella natans]
c76286.graph_c0	1.72104	0.0256092	4.0004e-11	4.62299	up	--	--	--	--	[S]	Function unknown	Ribosomal protein L1p/L10e family	Ribosomal L1 domain-containing protein CG13096 GN=CG13096 OS=Drosophila melanogaster (Fruit fly) PE=1 SV=1	hypothetical protein BRAFLDRAFT_118996 [Branchiostoma floridae]
c76289.graph_c0	0	2.04216	1.18944e-11	-5.34015	down	--	--	--	--	--	--	Chlorophyll A-B binding protein	--	chlorophyll a/b-binding protein II 2 [Bigelowiella natans]
c76314.graph_c0	0	2.309	1.84505e-11	-5.3161	down	--	--	--	--	--	--	Chlorophyll A-B binding protein	--	light harvesting complex protein LHCII-3 [Gymnochlora stellata]
c76316.graph_c0	1.78883	0.12086	1.81837e-05	3.19328	up	--	--	--	--	--	--	--	Caprin homolog GN=Capr OS=Drosophila melanogaster (Fruit fly) PE=1 SV=1	hypothetical protein, partial [Coptotermes formosanus]
c76318.graph_c0	1.82821	0	4.40538e-08	4.78252	up	[O]	Posttranslational modification, protein turnover, chaperones	Biological Process: protein peptidyl-prolyl isomerization (GO:0000413);; Molecular Function: peptidyl-prolyl cis-trans isomerase activity (GO:0003755);; Biological Process: protein folding (GO:0006457);;	K03768|1e-129|aml:100472489|peptidyl-prolyl cis-trans isomerase B-like	[O]	Posttranslational modification, protein turnover, chaperones	Cyclophilin type peptidyl-prolyl cis-trans isomerase/CLD	Peptidyl-prolyl cis-trans isomerase 5 (Precursor) GN=cyn-5 OS=Caenorhabditis elegans PE=1 SV=2	PREDICTED: peptidyl-prolyl cis-trans isomerase B-like isoform 1 [Strongylocentrotus purpuratus]
c76329.graph_c0	1.71876	0	3.84426e-06	4.44544	up	--	--	--	--	--	--	LITAF-like zinc ribbon domain	Cell death-inducing p53-target protein 1 homolog GN=litaf OS=Dictyostelium discoideum (Slime mold) PE=3 SV=1	lipopolysaccharide induced transcription factor [Echinococcus granulosus]
c76340.graph_c0	1.69938	0	6.83519e-06	4.39717	up	[G]	Carbohydrate transport and metabolism	Molecular Function: catalytic activity (GO:0003824);;	K06519|5e-97|dre:796322|slc3a2, MGC64069, fc65h12, wu:fc65h12	[G]	Carbohydrate transport and metabolism	Alpha amylase, catalytic domain	Maltase A2 (Precursor) GN=Mal-A2 OS=Drosophila melanogaster (Fruit fly) PE=2 SV=2	Neutral and basic amino acid transport protein rBAT [Zootermopsis nevadensis]
c76346.graph_c0	0	1.28891	6.98795e-11	-5.24146	down	--	--	Molecular Function: catalytic activity (GO:0003824);; Biological Process: lipid metabolic process (GO:0006629);; Biological Process: cellular metabolic process (GO:0044237);;	--	--	--	Lipoxygenase	Arachidonate 8-lipoxygenase OS=Plexaura homomalla (Black sea rod) PE=1 SV=1	allene oxide synthase/8R-lipoxygenase fusion protein a [Capnella imbricata]
c76371.graph_c0	0	1.67858	1.19999e-05	-4.39842	down	--	--	--	--	--	--	PsbP	--	photosystem II oxygen evolving enhancer protein 2 [Gymnochlora stellata]
c76376.graph_c0	1.53353	0.0456382	6.28363e-05	3.65764	up	--	--	Biological Process: translational initiation (GO:0006413);; Cellular Component: macromolecular complex (GO:0032991);; Cellular Component: cytoplasmic part (GO:0044444);;	K03245|1e-117|dre:394189|eif3ja, MGC63801, eif3j, eif3s1, zgc:63801	[J]	Translation, ribosomal structure and biogenesis	Translation initiation factor eIF3 subunit	Eukaryotic translation initiation factor 3 subunit J {ECO:0000255|HAMAP-Rule:MF_03009} GN=v1g240395 OS=Nematostella vectensis (Starlet sea anemone) PE=3 SV=1	predicted protein [Nematostella vectensis]
c76378.graph_c0	1.88195	0.106319	3.94542e-09	3.5569	up	--	--	--	--	[TZ]	--	RhoGAP domain	Rho GTPase-activating protein gacY GN=gacY OS=Dictyostelium discoideum (Slime mold) PE=3 SV=1	PREDICTED: dentin sialophosphoprotein-like [Aplysia californica]
c76385.graph_c0	1.80567	0	4.13836e-12	5.33717	up	[C]	Energy production and conversion	Cellular Component: lipid particle (GO:0005811);; Cellular Component: cytosol (GO:0005829);; Biological Process: tricarboxylic acid cycle (GO:0006099);; Biological Process: malate metabolic process (GO:0006108);; Molecular Function: L-malate dehydrogenase activity (GO:0030060);; Biological Process: cellular carbohydrate metabolic process (GO:0044262);; Biological Process: lateral inhibition (GO:0…	K00025|0.0|dre:335715|mdh1b, fk59d03, mdh1, mdhB, wu:fk59d03, zgc:56234	[C]	Energy production and conversion	lactate/malate dehydrogenase, alpha/beta C-terminal domain;; lactate/malate dehydrogenase, NAD binding domain	Malate dehydrogenase, cytoplasmic GN=MDH OS=Echinococcus granulosus (Hydatid tapeworm) PE=2 SV=2	PREDICTED: malate dehydrogenase, cytoplasmic-like [Saccoglossus kowalevskii]
c76388.graph_c0	0	1.63455	2.07332e-07	-4.72499	down	[C]	Energy production and conversion	--	--	--	--	ATP synthase B/B' CF(0)	ATP synthase subunit b&apos;, organellar chromatophore {ECO:0000255|HAMAP-Rule:MF_01399} GN=PCC_0202 OS=Paulinella chromatophora PE=3 SV=1	ATP synthase beta subunit [Bigelowiella natans]
c76390.graph_c0	0	2.20252	1.53717e-06	-4.57092	down	--	--	--	--	[T]	Signal transduction mechanisms	EF hand;; EF-hand domain pair;; EF-hand domain;; EF-hand domain pair;; EF hand	Calmodulin GN=calA OS=Dictyostelium discoideum (Slime mold) PE=1 SV=3	PREDICTED: calmodulin-like [Saccoglossus kowalevskii]
c76396.graph_c0	1.24956	0	3.84426e-06	4.44544	up	[R]	General function prediction only	--	K13221|1e-139|dre:393506|MGC65780, zgc:77274	[A]	RNA processing and modification	WD domain, G-beta repeat	WD repeat-containing protein wdr-5.1 GN=wdr-5.1 OS=Caenorhabditis elegans PE=1 SV=1	hypothetical protein LOTGIDRAFT_195693 [Lottia gigantea]
c76406.graph_c0	1.68683	0.156179	0.00241886	2.758	up	[C]	Energy production and conversion	Molecular Function: iron ion binding (GO:0005506);; Cellular Component: mitochondrial intermembrane space (GO:0005758);; Molecular Function: electron carrier activity (GO:0009055);; Molecular Function: heme binding (GO:0020037);; Biological Process: electron transport chain (GO:0022900);; Cellular Component: respiratory chain (GO:0070469);;	K08738|5e-64|dre:415158|cyc, wu:fk52b01	[C]	Energy production and conversion	Cytochrome c	Cytochrome c OS=Pectinaria gouldii (Trumpet worm) PE=3 SV=1	Cytochrome c [Caligus rogercresseyi]
c76409.graph_c0	2.00688	0	1.78821e-09	4.992	up	--	--	--	--	[U]	Intracellular trafficking, secretion, and vesicular transport	FDF domain	--	PREDICTED: protein LSM14 homolog A-like isoform X3 [Aplysia californica]
c76413.graph_c0	1.67997	0	2.29034e-07	4.66515	up	--	--	--	--	[R]	General function prediction only	7 transmembrane receptor (rhodopsin family);; Serpentine type 7TM GPCR chemoreceptor Srx	Probable G-protein coupled receptor No9 OS=Amphibalanus amphitrite (Striped barnacle) PE=3 SV=1	hypothetical protein YQE_02179, partial [Dendroctonus ponderosae]
c76414.graph_c0	0	1.91954	7.1433e-06	-4.44352	down	--	--	--	--	--	--	Photosystem II protein Y (PsbY)	--	--
c76418.graph_c0	0	1.97853	1.81511e-08	-4.89697	down	--	--	--	--	--	--	Photosystem I reaction centre subunit XI	--	--
c76419.graph_c0	1.69147	0	3.84426e-06	4.44544	up	[C]	Energy production and conversion	Molecular Function: NAD(P)+ transhydrogenase activity (GO:0008746);;	--	--	--	Domain of unknown function (DUF3814)	--	NAD(P) transhydrogenase, mitochondrial, partial [Stegodyphus mimosarum]
c76420.graph_c0	0	1.58235	1.71917e-10	-5.18946	down	[G]	Carbohydrate transport and metabolism	--	K09864|7e-50|gga:420384|AQP1	[G]	Carbohydrate transport and metabolism	Major intrinsic protein	Aquaporin AQPAe.a GN=AAEL003512 OS=Aedes aegypti (Yellowfever mosquito) PE=2 SV=2	water and ammonia transporting aquaporin [Lumbricus rubellus]
c76433.graph_c0	0	1.34719	2.55676e-06	-4.52969	down	[J]	Translation, ribosomal structure and biogenesis	Cellular Component: intracellular (GO:0005622);;	K02940|2e-76|cin:100177652|similar to 60S ribosomal protein L9	[J]	Translation, ribosomal structure and biogenesis	Ribosomal protein L6	60S ribosomal protein L9 GN=RpL9 OS=Spodoptera frugiperda (Fall armyworm) PE=2 SV=1	60S ribosomal protein L9 [Anopheles darlingi]
c76435.graph_c0	0	1.78645	1.09468e-10	-5.21569	down	--	--	Cellular Component: membrane part (GO:0044425);;	--	--	--	Manganese-stabilising protein / photosystem II polypeptide	--	photosystem II oxygen evolving enhancer protein 1 [Gymnochlora stellata]
c76440.graph_c0	1.91816	0	1.22009e-05	4.34724	up	--	--	--	K04734|6e-71|dre:323099|nfkbiab, MGC56666, NFKBIA, fb81f08, ikbaB, wu:fb81f08, zgc:56666, zgc:77616	[R]	General function prediction only	Ankyrin repeats (3 copies);; Ankyrin repeat;; Ankyrin repeats (many copies);; Ankyrin repeats (many copies);; Ankyrin repeat	NF-kappa-B inhibitor cactus GN=cact OS=Drosophila melanogaster (Fruit fly) PE=1 SV=2	NF-kappa-B inhibitor cactus [Cerapachys biroi]
c76459.graph_c0	2.36439	0	3.02513e-09	4.95913	up	--	--	--	--	[O]	Posttranslational modification, protein turnover, chaperones	Kazal-type serine protease inhibitor domain;; Kazal-type serine protease inhibitor domain	Four-domain proteases inhibitor OS=Melithaea caledonica PE=1 SV=1	Kazal-type protease inhibitor [Eriocheir sinensis]
c76474.graph_c0	1.93477	0	6.83519e-06	4.39717	up	[L]	Replication, recombination and repair	Molecular Function: DNA binding (GO:0003677);; Molecular Function: DNA helicase activity (GO:0003678);; Molecular Function: ATP binding (GO:0005524);; Biological Process: DNA replication initiation (GO:0006270);; Biological Process: DNA duplex unwinding (GO:0032508);; Cellular Component: MCM complex (GO:0042555);;	K02212|1e-102|gga:421110|similar to DNA replication initiator protein	[L]	Replication, recombination and repair	MCM2/3/5 family	DNA replication licensing factor MCM4 GN=dpa OS=Drosophila melanogaster (Fruit fly) PE=1 SV=2	DNA replication licensing factor mcm4-like protein, partial [Biomphalaria glabrata]
c76494.graph_c0	0	1.60914	4.47199e-11	-5.26677	down	[G]	Carbohydrate transport and metabolism	Molecular Function: oxidoreductase activity (GO:0016491);;	K00134|1e-96|cin:100186457|similar to Glyceraldehyde-3-phosphate dehydrogenase (GAPDH)	[G]	Carbohydrate transport and metabolism	Glyceraldehyde 3-phosphate dehydrogenase, C-terminal domain;; Glyceraldehyde 3-phosphate dehydrogenase, NAD binding domain;; CP12 domain	Glyceraldehyde-3-phosphate dehydrogenase, cytosolic OS=Trypanosoma brucei brucei PE=1 SV=3	PREDICTED: glyceraldehyde-3-phosphate dehydrogenase, chromosomal-like [Amphimedon queenslandica]
c76500.graph_c0	0	1.82614	5.61004e-07	-4.65001	down	--	--	Cellular Component: intracellular (GO:0005622);;	K05765|2e-29|tad:TRIADDRAFT_57086|hypothetical protein	[Z]	Cytoskeleton	Cofilin/tropomyosin-type actin-binding protein	Actophorin OS=Acanthamoeba castellanii (Amoeba) PE=1 SV=2	Chain A, Recombinant Actophorin
c76507.graph_c0	0	1.60925	2.93692e-08	-4.86417	down	[H]	Coenzyme transport and metabolism	Biological Process: thiamine biosynthetic process (GO:0009228);; Molecular Function: iron-sulfur cluster binding (GO:0051536);;	--	--	--	ThiC family	--	PREDICTED: phosphomethylpyrimidine synthase-like [Amphimedon queenslandica]
c76551.graph_c0	1.74292	0	2.18657e-05	4.29552	up	[C]	Energy production and conversion	Molecular Function: lipid binding (GO:0008289);; Molecular Function: hydrogen ion transmembrane transporter activity (GO:0015078);; Biological Process: ATP synthesis coupled proton transport (GO:0015986);; Biological Process: ATP hydrolysis coupled proton transport (GO:0015991);; Cellular Component: integral component of membrane (GO:0016021);; Cellular Component: proton-transporting ATP synthase…	K02128|2e-74|dre:406301|MGC86684, wu:fb13h01, wu:fb14d03, zgc:86684	[C]	Energy production and conversion	ATP synthase subunit C	ATP synthase lipid-binding protein, mitochondrial (Precursor) OS=Manduca sexta (Tobacco hawkmoth) PE=2 SV=1	putative F0 subunit of ATP synthase [Hydroides elegans]
c76572.graph_c0	1.31531	0	3.99625e-07	4.6238	up	[U]	Intracellular trafficking, secretion, and vesicular transport	Biological Process: intracellular protein transport (GO:0006886);; Biological Process: nucleocytoplasmic transport (GO:0006913);; Molecular Function: Ran GTPase binding (GO:0008536);; Molecular Function: protein transporter activity (GO:0008565);;	K14293|0.0|dre:570700|kpnb1, MGC123184, wu:fc12b10, zgc:123184	[YU]	--	HEAT repeat;; HEAT-like repeat;; HEAT repeats;; Armadillo/beta-catenin-like repeat	Importin subunit beta GN=Fs(2)Ket OS=Drosophila melanogaster (Fruit fly) PE=2 SV=2	Importin subunit beta-1, partial [Stegodyphus mimosarum]
c76599.graph_c0	0	1.79508	2.07332e-07	-4.72499	down	--	--	--	--	--	--	--	Annexin B11 GN=AnxB11 OS=Drosophila melanogaster (Fruit fly) PE=2 SV=2	PREDICTED: prisilkin-39-like [Aplysia californica]
c76626.graph_c0	1.29236	0	3.99625e-07	4.6238	up	[P]	Inorganic ion transport and metabolism	Molecular Function: calcium-transporting ATPase activity (GO:0005388);; Molecular Function: ATP binding (GO:0005524);; Cellular Component: nuclear envelope (GO:0005635);; Biological Process: cellular calcium ion homeostasis (GO:0006874);; Biological Process: receptor-mediated endocytosis (GO:0006898);; Biological Process: apoptotic process (GO:0006915);; Biological Process: determination of adult…	K05853|0.0|dre:494489|atp2a1l, zgc:154094	[P]	Inorganic ion transport and metabolism	E1-E2 ATPase;; Putative hydrolase of sodium-potassium ATPase alpha subunit	Calcium-transporting ATPase sarcoplasmic/endoplasmic reticulum type OS=Anopheles gambiae (African malaria mosquito) PE=3 SV=5	PREDICTED: sarcoplasmic/endoplasmic reticulum calcium ATPase 1-like isoform X2 [Ciona intestinalis]
c76634.graph_c0	1.31356	0	2.25386e-10	5.11646	up	[C]	Energy production and conversion	Molecular Function: NAD(P)+ transhydrogenase (AB-specific) activity (GO:0008750);; Biological Process: proton transport (GO:0015992);; Cellular Component: integral component of membrane (GO:0016021);; Molecular Function: NADP binding (GO:0050661);; Biological Process: oxidation-reduction process (GO:0055114);;	--	--	--	NAD(P) transhydrogenase beta subunit	--	PREDICTED: NAD(P) transhydrogenase, mitochondrial-like [Ciona intestinalis]
c76646.graph_c0	1.43949	0	9.10383e-15	5.63643	up	--	--	--	--	[O]	Posttranslational modification, protein turnover, chaperones	Glycosyl transferase family 2;; Ricin-type beta-trefoil lectin domain	Polypeptide N-acetylgalactosaminyltransferase 3 GN=gly-3 OS=Caenorhabditis elegans PE=2 SV=2	PREDICTED: polypeptide N-acetylgalactosaminyltransferase 4 [Ciona intestinalis]
c76658.graph_c0	2.6322	0	3.93446e-05	4.24187	up	--	--	--	--	[A]	RNA processing and modification	--	--	MAK16-like protein, partial [Crassostrea gigas]
c76706.graph_c0	1.4872	0.0364489	2.4607e-06	3.92561	up	[O]	Posttranslational modification, protein turnover, chaperones	Molecular Function: ATP binding (GO:0005524);; Biological Process: protein folding (GO:0006457);; Biological Process: response to stress (GO:0006950);; Molecular Function: unfolded protein binding (GO:0051082);;	K09487|1e-177|dre:386590|hsp90b1, GP96, GRP94, fb61d09, tra-1, tra1, wu:fb61d09, wu:fq25g01	[O]	Posttranslational modification, protein turnover, chaperones	Hsp90 protein	Heat shock protein 90 GN=HSP90 OS=Brugia pahangi (Filarial nematode worm) PE=2 SV=2	heat shock protein gp96 [Apostichopus japonicus]
c76718.graph_c0	1.48058	0	4.40538e-08	4.78252	up	--	--	--	K05019|1e-115|dre:30699|icln	[P]	Inorganic ion transport and metabolism	Regulator of volume decrease after cellular swelling	Methylosome subunit pICln GN=icln OS=Drosophila melanogaster (Fruit fly) PE=1 SV=1	PREDICTED: methylosome subunit pICln-like [Saccoglossus kowalevskii]
c76725.graph_c0	0	1.63327	3.4052e-07	-4.68799	down	--	--	Molecular Function: catalytic activity (GO:0003824);; Biological Process: lipid metabolic process (GO:0006629);;	--	--	--	Lipoxygenase	Arachidonate 8-lipoxygenase OS=Plexaura homomalla (Black sea rod) PE=1 SV=1	allene oxide synthase/8R-lipoxygenase fusion protein [Gersemia fruticosa]
c76730.graph_c0	1.76637	0	2.18657e-05	4.29552	up	--	--	--	--	[T]	Signal transduction mechanisms	Low-density lipoprotein receptor domain class A	Vitellogenin receptor {ECO:0000312|EMBL:AAP92450.1} (Precursor) OS=Solenopsis invicta (Red imported fire ant) PE=2 SV=1	hypothetical protein CAPTEDRAFT_62161, partial [Capitella teleta]
c76755.graph_c0	1.60132	0	3.84426e-06	4.44544	up	--	--	--	K14303|1e-129|dre:393635|MGC66306	[YU]	--	Nucleoporin Nup120/160	Nuclear pore complex protein Nup160 homolog GN=Nup160 OS=Drosophila melanogaster (Fruit fly) PE=1 SV=1	PREDICTED: nuclear pore complex protein Nup160-like [Saccoglossus kowalevskii]
c76770.graph_c0	0	1.1866	2.93692e-08	-4.86417	down	[O]	Posttranslational modification, protein turnover, chaperones	Biological Process: cellular protein metabolic process (GO:0044267);;	--	[O]	Posttranslational modification, protein turnover, chaperones	TCP-1/cpn60 chaperonin family	Chaperonin homolog Hsp-60, mitochondrial (Precursor) GN=hsp-60 OS=Caenorhabditis elegans PE=1 SV=2	PREDICTED: 60 kDa chaperonin-like [Ceratitis capitata]
c76797.graph_c0	0	1.20394	3.85803e-13	-5.51934	down	[E]	Amino acid transport and metabolism	Biological Process: glycine metabolic process (GO:0006544);; Molecular Function: oxidoreductase activity (GO:0016491);;	K00281|0.0|xla:379833|gldc, MGC53992	[E]	Amino acid transport and metabolism	Glycine cleavage system P-protein	Glycine dehydrogenase (decarboxylating), mitochondrial (Precursor) GN=gcvP OS=Dictyostelium discoideum (Slime mold) PE=3 SV=1	hypothetical protein SAMD00019534_011120, partial [Acytostelium subglobosum LB1]
c76801.graph_c0	1.72565	0.0287591	7.12405e-10	4.4637	up	--	--	--	--	[U]	Intracellular trafficking, secretion, and vesicular transport	Reticulon	Uncharacterized protein DDB_G0282077 (Precursor) GN=DDB_G0282077 OS=Dictyostelium discoideum (Slime mold) PE=3 SV=2	reticulon-like protein [Saccoglossus kowalevskii]
c76804.graph_c0	1.74237	0	3.93446e-05	4.24187	up	--	--	--	--	--	--	CUB domain	--	--
c76818.graph_c0	0	2.2172	7.1433e-06	-4.44352	down	--	--	--	--	--	--	Photosystem II reaction centre W protein (PsbW)	--	photosystem II protein PsbW [Bigelowiella natans]
c76859.graph_c0	1.2385	0	2.5609e-08	4.81961	up	--	--	--	K04402|2e-57|dre:497646|gadd45bb, gadd45b1, gadd45bl, zgc:112453	--	--	Ribosomal protein L7Ae/L30e/S12e/Gadd45 family	--	Growth arrest and DNA-damage-inducible protein GADD45 gamma [Crassostrea gigas]
c76872.graph_c0	1.73789	0	2.98355e-11	5.23103	up	--	--	Molecular Function: nucleotide binding (GO:0000166);; Molecular Function: protein kinase activity (GO:0004672);; Molecular Function: protein binding (GO:0005515);; Biological Process: phosphorylation (GO:0016310);; Biological Process: cellular protein metabolic process (GO:0044267);;	--	[R]	General function prediction only	RNA recognition motif. (a.k.a. RRM, RBD, or RNP domain);; RNA recognition motif. (a.k.a. RRM, RBD, or RNP domain)	Protein couch potato GN=cpo OS=Drosophila melanogaster (Fruit fly) PE=2 SV=3	PREDICTED: protein couch potato-like isoform X2 [Saccoglossus kowalevskii]
c76876.graph_c0	1.50468	0	3.84426e-06	4.44544	up	[R]	General function prediction only	--	--	[R]	General function prediction only	RNA recognition motif. (a.k.a. RRM, RBD, or RNP domain);; RNA recognition motif (a.k.a. RRM, RBD, or RNP domain);; RNA recognition motif. (a.k.a. RRM, RBD, or RNP domain)	Polyadenylate-binding protein GN=pAbp OS=Drosophila melanogaster (Fruit fly) PE=1 SV=3	hypothetical protein BRAFLDRAFT_123569 [Branchiostoma floridae]
c76941.graph_c0	1.56768	0	5.13436e-09	4.9255	up	--	--	--	--	--	--	FAM195 family	--	PREDICTED: uncharacterized protein LOC100882003 [Megachile rotundata]
c76956.graph_c0	0	1.13994	1.70763e-09	-5.05061	down	[U]	Intracellular trafficking, secretion, and vesicular transport	--	K09647|9e-16|dsi:Dsim_GD15786|GD15786 gene product from transcript GD15786-RA	[O]	Posttranslational modification, protein turnover, chaperones	Signal peptidase, peptidase S26;; Peptidase S24-like	--	GD15786 [Drosophila simulans]
c76958.graph_c0	1.54466	0	2.17049e-06	4.49214	up	[G]	Carbohydrate transport and metabolism	Molecular Function: magnesium ion binding (GO:0000287);; Molecular Function: pyruvate kinase activity (GO:0004743);; Biological Process: glycolysis (GO:0006096);; Biological Process: phosphorylation (GO:0016310);; Molecular Function: potassium ion binding (GO:0030955);;	K00873|0.0|dre:335817|pkm2a, cb1029, fj33f03, pkm2, wu:fj33f03	[G]	Carbohydrate transport and metabolism	Pyruvate kinase, barrel domain	Pyruvate kinase GN=PyK OS=Drosophila melanogaster (Fruit fly) PE=2 SV=2	PREDICTED: pyruvate kinase PKM [Ciona intestinalis]
c76967.graph_c0	0	1.47915	1.26625e-07	-4.76106	down	[C]	Energy production and conversion	Molecular Function: hydrolase activity (GO:0016787);;	--	[C]	Energy production and conversion	ATP synthase	ATP synthase subunit gamma, mitochondrial (Precursor) GN=atp5C1 OS=Dictyostelium discoideum (Slime mold) PE=1 SV=1	ATP synthase gamma subunit [Bigelowiella natans]
c76972.graph_c0	1.49699	0.0430145	3.63594e-05	3.7059	up	--	--	Molecular Function: nucleic acid binding (GO:0003676);; Cellular Component: nuclear lumen (GO:0031981);; Biological Process: single-organism cellular process (GO:0044763);;	K11278|7e-74|dre:541357|npm3, zgc:113084	--	--	Nucleoplasmin	Mitotic apparatus protein p62 OS=Lytechinus pictus (Painted sea urchin) PE=2 SV=1	hypothetical protein LOTGIDRAFT_228383 [Lottia gigantea]
c76977.graph_c0	0	0.937159	7.1433e-06	-4.44352	down	[R]	General function prediction only	--	--	[T]	Signal transduction mechanisms	WD domain, G-beta repeat;; Nucleoporin Nup120/160;; Eukaryotic translation initiation factor eIF2A	Guanine nucleotide-binding protein subunit beta-2-like 1 OS=Biomphalaria glabrata (Bloodfluke planorb) PE=2 SV=1	receptor of activated protein kinase C [Platynereis dumerilii]
c77037.graph_c0	1.80585	0	3.02513e-09	4.95913	up	--	--	--	K06943|1e-172|dre:334050|gtpbp4, fi28d07, wu:fi28d07, zgc:55757	[R]	General function prediction only	NOGCT (NUC087) domain	Probable nucleolar GTP-binding protein 1 GN=T07A9.9 OS=Caenorhabditis elegans PE=3 SV=1	Nucleolar GTP-binding protein 1 [Crassostrea gigas]
c77075.graph_c0	1.29229	0.0489475	1.112e-07	3.79808	up	--	--	Cellular Component: nucleus (GO:0005634);; Biological Process: nucleosome assembly (GO:0006334);;	K11290|0.0|gga:417210|SET	[L]	Replication, recombination and repair	Nucleosome assembly protein (NAP)	Protein SET GN=Set OS=Drosophila melanogaster (Fruit fly) PE=1 SV=2	hypothetical protein CAPTEDRAFT_153159 [Capitella teleta]
c77105.graph_c0	0	1.45577	3.4052e-07	-4.68799	down	--	--	Molecular Function: peptidase activity (GO:0008233);;	K01363|8e-91|mcc:100424758|CTSB	[O]	Posttranslational modification, protein turnover, chaperones	Papain family cysteine protease	Cathepsin B-like cysteine proteinase 5 (Precursor) GN=cpr-5 OS=Caenorhabditis elegans PE=2 SV=1	PREDICTED: cathepsin B [Ciona intestinalis]
c77124.graph_c0	1.39443	0	6.75238e-12	5.31136	up	[O]	Posttranslational modification, protein turnover, chaperones	Molecular Function: ATP binding (GO:0005524);; Cellular Component: cytoplasm (GO:0005737);; Biological Process: protein folding (GO:0006457);; Molecular Function: unfolded protein binding (GO:0051082);;	K09494|0.0|dre:192326|cct2, CHUNP6883, fa26a01, fc58a11, wu:fa26a01, wu:fc58a11	[O]	Posttranslational modification, protein turnover, chaperones	TCP-1/cpn60 chaperonin family	T-complex protein 1 subunit beta GN=cct2 OS=Dictyostelium discoideum (Slime mold) PE=1 SV=1	PREDICTED: T-complex protein 1 subunit beta-like isoform X2 [Aplysia californica]
c77143.graph_c0	1.01199	0	1.23016e-06	4.53737	up	[U]	Intracellular trafficking, secretion, and vesicular transport	Biological Process: intracellular transport (GO:0046907);;	--	[U]	Intracellular trafficking, secretion, and vesicular transport	RanBP1 domain	Ran-specific GTPase-activating protein homolog GN=ranbp1 OS=Dictyostelium discoideum (Slime mold) PE=1 SV=1	Ran-specific GTPase-activating protein [Lepeophtheirus salmonis]
c77177.graph_c0	0	1.41948	2.55676e-06	-4.52969	down	--	--	--	--	--	--	Chlorophyll A-B binding protein	--	light harvesting complex protein LHCII-3 [Gymnochlora stellata]
c77184.graph_c0	1.20713	0.0437341	4.22069e-08	3.86028	up	[J]	Translation, ribosomal structure and biogenesis	--	K13199|0.0|dre:100332749|SERPINE1 mRNA binding protein 1-like	[R]	General function prediction only	Hyaluronan / mRNA binding family	Eukaryotic translation initiation factor 3 subunit A {ECO:0000255|HAMAP-Rule:MF_03000} OS=Culex quinquefasciatus (Southern house mosquito) PE=3 SV=2	hypothetical protein CAPTEDRAFT_227286 [Capitella teleta]
c77191.graph_c0	0	1.42209	4.32987e-15	-5.73421	down	--	--	--	--	[R]	General function prediction only	YT521-B-like domain	--	YTH domain family protein 2 [Acromyrmex echinatior]
c77203.graph_c0	0	1.2291	7.75685e-08	-4.79626	down	--	--	--	--	[I]	Lipid transport and metabolism	START domain	--	PREDICTED: hypothetical protein LOC100635535 [Amphimedon queenslandica]
c77212.graph_c0	1.34596	0.0303126	5.05981e-07	4.04299	up	[O]	Posttranslational modification, protein turnover, chaperones	Molecular Function: ATP binding (GO:0005524);; Biological Process: response to stress (GO:0006950);; Molecular Function: 2-alkenal reductase [NAD(P)] activity (GO:0032440);; Biological Process: oxidation-reduction process (GO:0055114);;	K09490|0.0|dre:378848|hspa5, cb865, fb60h09, fi36d04, wu:fb60h09, wu:fi36d04, zgc:55994, zgc:77606	[O]	Posttranslational modification, protein turnover, chaperones	Hsp70 protein;; NAD-specific glutamate dehydrogenase;; NAD-specific glutamate dehydrogenase	Heat shock 70 kDa protein cognate 3 (Precursor) GN=Hsc70-3 OS=Drosophila melanogaster (Fruit fly) PE=2 SV=2	heat shock protein, putative [Ixodes scapularis]
c77234.graph_c0	1.52823	0	3.84426e-06	4.44544	up	--	--	Biological Process: intracellular protein transport (GO:0006886);; Molecular Function: Ran GTPase binding (GO:0008536);;	--	[YU]	--	--	Probable importin-5 homolog GN=DDB_G0291650 OS=Dictyostelium discoideum (Slime mold) PE=3 SV=1	hypothetical protein CAPTEDRAFT_179015 [Capitella teleta]
c77247.graph_c0	1.9878	0	1.4938e-08	4.85578	up	--	--	--	K05759|6e-80|dre:321383|pfn2l, hm:zeh0341, wu:fb02e10, wu:fi35b08, zgc:86790	[Z]	Cytoskeleton	Profilin	Profilin OS=Strongylocentrotus purpuratus (Purple sea urchin) PE=2 SV=2	putative profilin [Hirudo medicinalis]
c77266.graph_c0	0	1.01959	2.55676e-06	-4.52969	down	[G]	Carbohydrate transport and metabolism	Molecular Function: catalytic activity (GO:0003824);;	--	[G]	Carbohydrate transport and metabolism	Transketolase, pyrimidine binding domain;; Transketolase, C-terminal domain	Transketolase GN=tkt OS=Physarum polycephalum (Slime mold) PE=2 SV=1	transketolase [Salpingoeca rosetta]
c77315.graph_c0	1.57128	0	7.60475e-08	4.74445	up
c77318.graph_c0	0	1.5433	6.99285e-09	-4.9604	down	[K]	Transcription	--	K08024|1e-10|ssc:397232|PHEX, Hhex	[K]	Transcription	Homeobox domain;; Homeobox associated leucine zipper	Hematopoietically-expressed homeobox protein HHEX homolog OS=Patiria miniata (Bat star) PE=2 SV=1	transcription factor protein [Ciona intestinalis]
c77319.graph_c0	0	1.45764	2.07332e-07	-4.72499	down	--	--	--	--	--	--	Pectinesterase	--	pectin methylesterase [Sitophilus oryzae]
c77322.graph_c0	1.44737	0	1.22009e-05	4.34724	up	--	--	--	K11979|1e-96|dre:322815|ubr7, fb74a06, wu:fb74a06, wu:fi29b06, zgc:55404	[R]	General function prediction only	--	Putative E3 ubiquitin-protein ligase ubr7 GN=ubr7 OS=Dictyostelium discoideum (Slime mold) PE=3 SV=2	hypothetical protein BRAFLDRAFT_237524 [Branchiostoma floridae]
c77327.graph_c0	1.55059	0	2.17049e-06	4.49214	up	[J]	Translation, ribosomal structure and biogenesis	Molecular Function: translation initiation factor activity (GO:0003743);; Molecular Function: GTPase activity (GO:0003924);; Molecular Function: GTP binding (GO:0005525);; Cellular Component: nucleus (GO:0005634);; Cellular Component: chromosome (GO:0005694);; Biological Process: GTP catabolic process (GO:0006184);; Biological Process: translational initiation (GO:0006413);; Molecular Function: z…	K03242|0.0|dre:327341|eif2s3, Su(var)3-9, fi03g03, wu:fi03g03, wu:fi37d04, zgc:63805	[J]	Translation, ribosomal structure and biogenesis	Elongation factor Tu GTP binding domain;; Elongation factor Tu domain 2	Eukaryotic translation initiation factor 2 subunit 3 GN=eIF-2gamma OS=Drosophila melanogaster (Fruit fly) PE=2 SV=1	hypothetical protein BRAFLDRAFT_125911 [Branchiostoma floridae]
c77362.graph_c0	1.45556	0.0466499	0.000189235	3.55598	up	--	--	--	--	--	--	--	--	PREDICTED: small integral membrane protein 13 isoform X1 [Diaphorina citri]
c77363.graph_c0	1.64152	0	4.92426e-11	5.20323	up	--	--	--	--	[DZ]	--	Microtubule associated protein (MAP65/ASE1 family)	Calponin homology domain-containing protein DDB_G0272472 GN=DDB_G0272472 OS=Dictyostelium discoideum (Slime mold) PE=3 SV=1	hypothetical protein BRAFLDRAFT_124259 [Branchiostoma floridae]
c77397.graph_c0	0	0.995514	9.27156e-07	-4.61101	down	--	--	Molecular Function: inorganic diphosphatase activity (GO:0004427);; Molecular Function: hydrogen-translocating pyrophosphatase activity (GO:0009678);; Biological Process: proton transport (GO:0015992);; Cellular Component: membrane (GO:0016020);;	--	--	--	Inorganic H+ pyrophosphatase	--	inorganic pyrophosphatase [Reticulomyxa filosa]
c77410.graph_c0	1.48717	0	6.83519e-06	4.39717	up	[O]	Posttranslational modification, protein turnover, chaperones	Molecular Function: ATP binding (GO:0005524);; Cellular Component: cytoplasm (GO:0005737);; Biological Process: protein folding (GO:0006457);; Molecular Function: unfolded protein binding (GO:0051082);;	K09498|1e-160|dre:116994|cct6a, fa95c01, wu:fa95c01	[O]	Posttranslational modification, protein turnover, chaperones	TCP-1/cpn60 chaperonin family	T-complex protein 1 subunit zeta GN=cct-6 OS=Caenorhabditis elegans PE=1 SV=1	PREDICTED: T-complex protein 1 subunit zeta-like isoform 2 [Strongylocentrotus purpuratus]
c77423.graph_c0	1.4356	0.0199377	6.16496e-12	4.72019	up	[R]	General function prediction only	Molecular Function: nucleic acid binding (GO:0003676);;	K13126|0.0|dre:327625|pabpc1l, fi20g03, pab-2, wu:fi20g03, zgc:55855	[AJ]	--	RNA recognition motif. (a.k.a. RRM, RBD, or RNP domain);; RNA recognition motif (a.k.a. RRM, RBD, or RNP domain);; RNA recognition motif. (a.k.a. RRM, RBD, or RNP domain);; Limkain b1	Polyadenylate-binding protein GN=pAbp OS=Drosophila melanogaster (Fruit fly) PE=1 SV=3	Polyadenylate-binding protein 1 [Zootermopsis nevadensis]
c77446.graph_c0	0	1.12904	9.27156e-07	-4.61101	down	[O]	Posttranslational modification, protein turnover, chaperones	Molecular Function: antioxidant activity (GO:0016209);; Molecular Function: peroxiredoxin activity (GO:0051920);; Biological Process: oxidation-reduction process (GO:0055114);;	K03386|1e-78|spu:590165|similar to mitochondrial truncated thioredoxin-dependent peroxide reductase precursor	[O]	Posttranslational modification, protein turnover, chaperones	AhpC/TSA family;; Redoxin;; C-terminal domain of 1-Cys peroxiredoxin	Peroxiredoxin OS=Ascaris suum (Pig roundworm) PE=2 SV=1	PREDICTED: thioredoxin-dependent peroxide reductase, mitochondrial-like [Saccoglossus kowalevskii]
c77476.graph_c0	0	1.37227	9.27156e-07	-4.61101	down	[Z]	Cytoskeleton	Molecular Function: GTPase activity (GO:0003924);; Molecular Function: structural constituent of cytoskeleton (GO:0005200);; Molecular Function: GTP binding (GO:0005525);; Cellular Component: cytoplasm (GO:0005737);; Cellular Component: microtubule (GO:0005874);; Biological Process: GTP catabolic process (GO:0006184);; Biological Process: microtubule-based process (GO:0007017);; Biological Proces…	--	[Z]	Cytoskeleton	Tubulin C-terminal domain	Tubulin alpha chain OS=Toxoplasma gondii PE=3 SV=1	tubulin alpha subunit [Monocercomonoides sp. PA]
c77557.graph_c0	0	1.39139	1.53717e-06	-4.57092	down	--	--	--	--	--	--	Peroxidase	--	glutathione peroxidase-like protein [Crassostrea ariakensis]
c77562.graph_c0	0	1.02437	7.75685e-08	-4.79626	down	[MG]	--	--	--	--	--	NADH(P)-binding;; NAD dependent epimerase/dehydratase family;; RmlD substrate binding domain	--	mRNA binding protein [Bigelowiella natans]
c77596.graph_c0	1.24697	0	1.06045e-09	5.02414	up	[L]	Replication, recombination and repair	Molecular Function: motor activity (GO:0003774);; Molecular Function: actin binding (GO:0003779);; Molecular Function: ATP binding (GO:0005524);; Biological Process: ubiquitin-dependent protein catabolic process (GO:0006511);; Cellular Component: myosin complex (GO:0016459);; Cellular Component: cullin-RING ubiquitin ligase complex (GO:0031461);; Molecular Function: ubiquitin protein ligase bindi…	K10352|0.0|dre:246275|myhz2, sb:cb38	[Z]	Cytoskeleton	Myosin tail	Myosin heavy chain, muscle GN=Mhc OS=Drosophila melanogaster (Fruit fly) PE=1 SV=4	PREDICTED: myosin-6-like [Ciona intestinalis]
c77625.graph_c0	0	1.33301	1.19999e-05	-4.39842	down	[C]	Energy production and conversion	Biological Process: multicellular organismal development (GO:0007275);; Biological Process: ATP synthesis coupled proton transport (GO:0015986);; Biological Process: single-organism developmental process (GO:0044767);;	K02137|1e-15|nve:NEMVE_v1g94346|hypothetical protein	[C]	Energy production and conversion	ATP synthase delta (OSCP) subunit	ATP synthase subunit delta, organellar chromatophore {ECO:0000255|HAMAP-Rule:MF_01416} GN=PCC_0204 OS=Paulinella chromatophora PE=3 SV=1	ATP synthase delta subunit [Bigelowiella natans]
c77660.graph_c0	1.34588	0	2.29034e-07	4.66515	up	--	--	Molecular Function: hydrolase activity (GO:0016787);;	--	[I]	Lipid transport and metabolism	KH domain;; KH domain;; Uncharacterized protein conserved in archaea (DUF2096);; KH domain	Protein bicaudal C GN=BicC OS=Drosophila melanogaster (Fruit fly) PE=1 SV=2	PREDICTED: vigilin-like [Saccoglossus kowalevskii]
c77661.graph_c0	1.36238	0	2.17049e-06	4.49214	up	--	--	Molecular Function: motor activity (GO:0003774);; Molecular Function: actin binding (GO:0003779);; Molecular Function: ATP binding (GO:0005524);; Biological Process: cellular process (GO:0009987);; Cellular Component: myosin complex (GO:0016459);;	K10352|0.0|dre:100008376|fd14a01	[Z]	Cytoskeleton	Myosin tail;; Protein of unknown function (DUF1664)	Myosin heavy chain, striated muscle OS=Argopecten irradians (Bay scallop) PE=1 SV=1	embryonic muscle myosin heavy chain [Halocynthia roretzi]
c77856.graph_c0	0	1.13013	9.27156e-07	-4.61101	down	[I]	Lipid transport and metabolism	--	K10256|3e-70|nve:NEMVE_v1g186588|hypothetical protein	--	--	Fatty acid desaturase	Omega-3 fatty acid desaturase fat-1 GN=fat-1 OS=Caenorhabditis elegans PE=2 SV=1	predicted protein [Nematostella vectensis]
c77885.graph_c0	1.11124	0	1.22009e-05	4.34724	up	--	--	Biological Process: compound eye photoreceptor cell differentiation (GO:0001751);; Molecular Function: monooxygenase activity (GO:0004497);; Cellular Component: nucleus (GO:0005634);; Cellular Component: microtubule associated complex (GO:0005875);; Biological Process: protein folding (GO:0006457);; Biological Process: activation of tryptophan 5-monooxygenase activity (GO:0006588);; Biological Pr…	K06630|8e-45|bta:100140254|similar to 14-3-3 protein zeta/delta (Protein kinase C inhibitor protein 1) (KCIP-1)	[O]	Posttranslational modification, protein turnover, chaperones	14-3-3 protein	14-3-3 protein zeta GN=CG17870 OS=Drosophila melanogaster (Fruit fly) PE=1 SV=1	14-3-3 zeta-like type II [Penaeus monodon]
c77993.graph_c0	1.30552	0.0435148	0.000329727	3.50233	up	--	--	Molecular Function: guanyl-nucleotide exchange factor activity (GO:0005085);; Cellular Component: lysosome (GO:0005764);; Biological Process: regulation of cell size (GO:0008361);; Biological Process: positive regulation of TOR signaling (GO:0032008);; Molecular Function: protein complex scaffold (GO:0032947);; Biological Process: protein localization to lysosome (GO:0061462);; Biological Process…	--	--	--	--	Ragulator complex protein LAMTOR4 homolog GN=v1g232793 OS=Nematostella vectensis (Starlet sea anemone) PE=3 SV=1	hypothetical protein BRAFLDRAFT_65552 [Branchiostoma floridae]
c78005.graph_c0	1.06669	0.131683	0.00785165	2.46811	up
c78031.graph_c0	0	1.3294	1.26625e-07	-4.76106	down	--	--	--	--	--	--	Proline-rich nuclear receptor coactivator	--	--
c78037.graph_c0	1.33735	0	5.13436e-09	4.9255	up	[RTKL]	--	Biological Process: activation of MAPKK activity (GO:0000186);; Molecular Function: MAP kinase kinase kinase activity (GO:0004709);; Biological Process: female meiosis II (GO:0007147);; Biological Process: female gamete generation (GO:0007292);; Biological Process: negative regulation of mitotic cell cycle (GO:0045930);;	K04367|1e-130|dre:795517|mos, MGC173909, c-mos	[T]	Signal transduction mechanisms	Protein kinase domain;; Protein tyrosine kinase	Serine/threonine-protein kinase mos {ECO:0000250|UniProtKB:P10741} OS=Patiria pectinifera (Starfish) PE=1 SV=1	predicted protein [Nematostella vectensis]
c78086.graph_c0	1.30261	0	1.4938e-08	4.85578	up	--	--	--	--	[TZ]	--	Formin Homology 2 Domain	Formin-H GN=forH OS=Dictyostelium discoideum (Slime mold) PE=1 SV=1	PREDICTED: microtubule-associated protein futsch-like [Saccoglossus kowalevskii]
c78097.graph_c0	1.21129	0.0229397	1.39299e-08	4.2846	up	--	--	Cellular Component: mitochondrial outer membrane (GO:0005741);; Molecular Function: voltage-gated anion channel activity (GO:0008308);; Biological Process: regulation of anion transport (GO:0044070);; Biological Process: transmembrane transport (GO:0055085);;	K05862|0.0|dre:322126|vdac2, wu:fa01a08, wu:fa98a10, wu:fb50g11, zgc:55795, zgc:77621	[P]	Inorganic ion transport and metabolism	Eukaryotic porin	Voltage-dependent anion-selective channel GN=porin OS=Drosophila melanogaster (Fruit fly) PE=1 SV=3	PREDICTED: voltage-dependent anion-selective channel protein 2-like [Saccoglossus kowalevskii]
c78117.graph_c0	1.5173	0	3.93446e-05	4.24187	up	[R]	General function prediction only	Molecular Function: transferase activity, transferring phosphorus-containing groups (GO:0016772);;	--	[R]	General function prediction only	ABC1 family	Ubiquinone biosynthesis protein coq-8 GN=coq-8 OS=Caenorhabditis elegans PE=3 SV=2	hypothetical protein LOTGIDRAFT_218121 [Lottia gigantea]
c78194.graph_c0	1.09134	0	1.23016e-06	4.53737	up	--	--	--	K01121|7e-25|bta:280752|CNP	[L]	Replication, recombination and repair	AAA domain	Nuclear pore complex protein DDB_G0274915 homolog GN=DDB_G0274915 OS=Dictyostelium discoideum (Slime mold) PE=4 SV=2	PREDICTED: uncharacterized protein LOC763199 isoform 2 [Strongylocentrotus purpuratus]
c78235.graph_c0	1.20635	0	3.76497e-10	5.08634	up	--	--	--	--	--	--	Golgi-localised syntaxin-1-binding clamp	--	--
c78253.graph_c0	1.12787	0	2.17049e-06	4.49214	up	[L]	Replication, recombination and repair	Molecular Function: hydrolase activity (GO:0016787);;	K14570|2e-96|xtr:100036702|hypothetical protein LOC100036702	[L]	Replication, recombination and repair	Exonuclease	Putative RNA exonuclease pqe-1 GN=pqe-1 OS=Caenorhabditis elegans PE=3 SV=2	RNAse H, putative [Ixodes scapularis]
c78347.graph_c0	1.3085	0	1.22009e-05	4.34724	up	--	--	Biological Process: mitotic spindle elongation (GO:0000022);; Cellular Component: kinetochore (GO:0000776);; Molecular Function: mRNA binding (GO:0003729);; Molecular Function: GTP binding (GO:0005525);; Cellular Component: nucleus (GO:0005634);; Cellular Component: centrosome (GO:0005813);; Cellular Component: polar microtubule (GO:0005827);; Cellular Component: microtubule associated complex (G…	K02602|1e-145|tgu:100222581|cytoplasmic polyadenylation element binding protein 1	[J]	Translation, ribosomal structure and biogenesis	RNA recognition motif. (a.k.a. RRM, RBD, or RNP domain)	Cytoplasmic polyadenylation element-binding protein 3 GN=cpb-3 OS=Caenorhabditis japonica PE=2 SV=1	PREDICTED: cytoplasmic polyadenylation element-binding protein 1-B-like [Strongylocentrotus purpuratus]
c78517.graph_c0	0.0438837	1.2433	1.54599e-05	-3.79119	down	--	--	--	--	[GE]	--	Triose-phosphate Transporter family;; EamA-like transporter family;; UAA transporter family	Solute carrier family 35 member E1 homolog GN=CG14621 OS=Drosophila melanogaster (Fruit fly) PE=2 SV=1	hypothetical protein NCLIV_026210 [Neospora caninum Liverpool]
c78536.graph_c0	1.37469	0	1.3174e-07	4.70534	up	--	--	--	--	[Z]	Cytoskeleton	--	Uncharacterized protein DDB_G0271670 (Precursor) GN=DDB_G0271670 OS=Dictyostelium discoideum (Slime mold) PE=3 SV=1	PREDICTED: nesprin-1-like [Saccoglossus kowalevskii]
c78877.graph_c0	0.0306629	0.894283	9.54147e-06	-3.83128	down	[LKJ]	--	Molecular Function: translation initiation factor activity (GO:0003743);; Molecular Function: ATP binding (GO:0005524);; Biological Process: translational initiation (GO:0006413);; Molecular Function: ATP-dependent helicase activity (GO:0008026);;	K03257|0.0|gga:395232|EIF4A2, EIF4AII	[J]	Translation, ribosomal structure and biogenesis	DEAD/DEAH box helicase;; Helicase conserved C-terminal domain	Eukaryotic initiation factor 4A GN=eIF-4a OS=Drosophila melanogaster (Fruit fly) PE=1 SV=3	Eukaryotic initiation factor 4A-II, partial [Stegodyphus mimosarum]
c79161.graph_c0	1.0165	0	3.93446e-05	4.24187	up	[O]	Posttranslational modification, protein turnover, chaperones	--	--	[O]	Posttranslational modification, protein turnover, chaperones	Glutathione S-transferase, N-terminal domain;; Glutathione S-transferase, N-terminal domain;; Glutathione S-transferase, N-terminal domain;; Glutathione S-transferase, C-terminal domain;; Glutathione S-transferase, C-terminal domain	Glutathione S-transferase 4 GN=Gst4 OS=Musca domestica (House fly) PE=2 SV=1	hypothetical protein BRAFLDRAFT_214367 [Branchiostoma floridae]
c79249.graph_c0	1.14479	0	3.99625e-07	4.6238	up	--	--	--	--	--	--	--	--	hypothetical protein DAPPUDRAFT_237569 [Daphnia pulex]
c79452.graph_c0	1.26881	0	2.29034e-07	4.66515	up	[L]	Replication, recombination and repair	Molecular Function: DNA binding (GO:0003677);; Cellular Component: nucleus (GO:0005634);; Biological Process: DNA replication (GO:0006260);;	K07466|1e-151|dre:327491|rpa1, wu:fi14b08, zgc:55337, zgc:77092	[L]	Replication, recombination and repair	Replication factor-A C terminal domain	Replication protein A 70 kDa DNA-binding subunit GN=RpA-70 OS=Drosophila melanogaster (Fruit fly) PE=1 SV=1	hypothetical protein BRAFLDRAFT_89408 [Branchiostoma floridae]
c79530.graph_c0	1.10727	0.0615112	0.000125775	3.26608	up	--	--	Molecular Function: binding (GO:0005488);; Biological Process: transcription from RNA polymerase II promoter (GO:0006366);;	K03122|5e-51|mmu:71828|Gtf2a1l, 1700011N16Rik, Alf, Gtf2a1lf	[K]	Transcription	Transcription factor IIA, alpha/beta subunit	Transcription initiation factor IIA beta chain GN=TfIIA-L OS=Drosophila melanogaster (Fruit fly) PE=1 SV=2	PREDICTED: transcription initiation factor IIA subunit 1 isoform X1 [Harpegnathos saltator]
c79574.graph_c0	1.07336	0.0344007	0.000189235	3.55598	up	[RTKL]	--	Molecular Function: nucleotide binding (GO:0000166);; Molecular Function: protein kinase activity (GO:0004672);; Biological Process: phosphorylation (GO:0016310);;	K06631|0.0|dre:280649|plk1, MGC110073, cb525, cb636, ik:tdsubc_2d1, plk, wu:fb37g11, wu:fb76g03, xx:tdsubc_2d1	[D]	Cell cycle control, cell division, chromosome partitioning	Protein kinase domain;; Protein tyrosine kinase;; POLO box duplicated region;; Kinase-like	Serine/threonine-protein kinase plk-1 GN=plk-1 OS=Caenorhabditis elegans PE=1 SV=3	PREDICTED: serine/threonine-protein kinase PLK1 [Ciona intestinalis]
c79644.graph_c0	0	1.04917	1.19999e-05	-4.39842	down	[P]	Inorganic ion transport and metabolism	Molecular Function: peroxidase activity (GO:0004601);; Biological Process: regulation of biological quality (GO:0065008);;	--	--	--	Peroxidase	--	hypothetical protein [Monosiga brevicollis MX1]
c79681.graph_c0	1.10384	0	1.23016e-06	4.53737	up	[LKJ]	--	Molecular Function: nucleic acid binding (GO:0003676);; Molecular Function: ATP binding (GO:0005524);; Molecular Function: ATP-dependent helicase activity (GO:0008026);;	--	[A]	RNA processing and modification	DEAD/DEAH box helicase;; Helicase conserved C-terminal domain	DEAD-box helicase Dbp80 GN=Dbp80 OS=Drosophila melanogaster (Fruit fly) PE=1 SV=1	predicted protein [Nematostella vectensis]
c79946.graph_c0	1.17881	0.0350817	6.28363e-05	3.65764	up	--	--	--	K06692|1e-113|dre:550235|im:7137623, psmd5	[O]	Posttranslational modification, protein turnover, chaperones	Proteasome non-ATPase 26S subunit	26S proteasome non-ATPase regulatory subunit 5 {ECO:0000250|UniProtKB:Q16401} GN=CG12096 OS=Drosophila melanogaster (Fruit fly) PE=1 SV=3	PREDICTED: 26S proteasome non-ATPase regulatory subunit 5-like [Saccoglossus kowalevskii]
c80131.graph_c0	1.17192	0	1.3174e-07	4.70534	up	--	--	Cellular Component: integral component of membrane (GO:0016021);; Biological Process: transmembrane transport (GO:0055085);;	--	[C]	Energy production and conversion	Mitochondrial carrier protein	Phosphate carrier protein, mitochondrial (Precursor) GN=F01G4.6 OS=Caenorhabditis elegans PE=2 SV=1	PREDICTED: phosphate carrier protein, mitochondrial [Ciona intestinalis]
c8481.graph_c0	1.22741	0	6.83519e-06	4.39717	up	--	--	--	K05759|6e-81|dre:321383|pfn2l, hm:zeh0341, wu:fb02e10, wu:fi35b08, zgc:86790	[Z]	Cytoskeleton	Profilin	Profilin OS=Entamoeba histolytica PE=1 SV=1	putative profilin [Hirudo medicinalis]
