# Supplementary material for: Comparative transcriptome analysis of papilla and skin in the sea cucumber, Apostichopus japonicus
Source: PeerJ. 2016 Mar 7;4:e1779. doi: 10.7717/peerj.1779 (PMC4793329; doi:10.7717/peerj.1779)
Supplement: Supplemental Information 3 [file peerj-04-1779-s003.xlsx]

## Sheet: Table S3
Supplemental Table S3. The detailed information of putative genes related to development.
Group	#ID	papilla	skin	FDR	log2FC	COG_class	COG_class_annotation	GO_annotation	KEGG_annotation	KOG_class	KOG_class_annotation	Pfam_annotation	Swissprot_annotation	nr_annotation
cell cycle	c19239.graph_c0	1.45388	0.0403833	2.1098e-05	3.7526	[TZDR]	--	Cellular Component: spindle pole (GO:0000922);; Molecular Function: calmodulin-dependent protein kinase activity (GO:0004683);; Molecular Function: calcium ion binding (GO:0005509);; Biological Process: detection of calcium ion (GO:0005513);; Molecular Function: calmodulin binding (GO:0005516);; Molecular Function: ATP binding (GO:0005524);; Cellular Component: centriole (GO:0005814);; Cellular C…	K02183|1e-101|mdo:100018191|hypothetical protein LOC100018191	[T]	Signal transduction mechanisms	EF hand;; EF-hand domain pair;; EF-hand domain pair;; EF-hand domain;; EF hand;; EF-hand domain;; Cytoskeletal-regulatory complex EF hand;; Secreted protein acidic and rich in cysteine Ca binding region;; Ca2+ insensitive EF hand;; Uncharacterised protein family (UPF0154)	Calmodulin OS=Stichopus japonicus (Sea cucumber) PE=1 SV=2	Protein CMD-1 [Caenorhabditis elegans]
	c16273.graph_c0	17.9614	0.258862	0	5.77118	[D]	Cell cycle control, cell division, chromosome partitioning	Biological Process: cell cycle (GO:0007049);;	K05868|0.0|dre:58025|ccnb1, cb267, ccnb, cycb, cycb1, wu:fa19g04, wu:fb16d01, wu:fb16e07, wu:fi21c01	[D]	Cell cycle control, cell division, chromosome partitioning	Cyclin, N-terminal domain;; Cyclin, C-terminal domain	G2/mitotic-specific cyclin-B OS=Patella vulgata (Common limpet) PE=2 SV=1	hypothetical protein LOTGIDRAFT_164886 [Lottia gigantea]
	c62169.graph_c0	17.4287	7.27093	0.00165347	1.09342	[TZDR]	--	Cellular Component: spindle pole (GO:0000922);; Molecular Function: calmodulin-dependent protein kinase activity (GO:0004683);; Molecular Function: calcium ion binding (GO:0005509);; Biological Process: detection of calcium ion (GO:0005513);; Molecular Function: calmodulin binding (GO:0005516);; Molecular Function: ATP binding (GO:0005524);; Cellular Component: centriole (GO:0005814);; Cellular C…	K02183|3e-96|tca:660864|similar to CG8472-PA, isoform A	[T]	Signal transduction mechanisms	EF hand;; EF-hand domain pair;; EF-hand domain pair;; EF-hand domain;; EF hand;; EF-hand domain;; Cytoskeletal-regulatory complex EF hand;; Secreted protein acidic and rich in cysteine Ca binding region;; Ca2+ insensitive EF hand;; Uncharacterised protein family (UPF0154)	Calmodulin OS=Stichopus japonicus (Sea cucumber) PE=1 SV=2	PREDICTED: calmodulin-like [Metaseiulus occidentalis]
	c40875.graph_c0	14.1112	0.127258	0	6.25536	[D]	Cell cycle control, cell division, chromosome partitioning	Biological Process: regulation of cell cycle (GO:0051726);;	K05868|1e-159|dre:368316|ccnb2, sb:cb303	[D]	Cell cycle control, cell division, chromosome partitioning	Cyclin, N-terminal domain;; Cyclin, C-terminal domain	G2/mitotic-specific cyclin-B OS=Patella vulgata (Common limpet) PE=2 SV=1	hypothetical protein CAPTEDRAFT_151793 [Capitella teleta]
	c77885.graph_c0	1.11124	0	1.22009e-05	4.34724	--	--	Biological Process: compound eye photoreceptor cell differentiation (GO:0001751);; Molecular Function: monooxygenase activity (GO:0004497);; Cellular Component: nucleus (GO:0005634);; Cellular Component: microtubule associated complex (GO:0005875);; Biological Process: protein folding (GO:0006457);; Biological Process: activation of tryptophan 5-monooxygenase activity (GO:0006588);; Biological Pr…	K06630|8e-45|bta:100140254|similar to 14-3-3 protein zeta/delta (Protein kinase C inhibitor protein 1) (KCIP-1)	[O]	Posttranslational modification, protein turnover, chaperones	14-3-3 protein	14-3-3 protein zeta GN=CG17870 OS=Drosophila melanogaster (Fruit fly) PE=1 SV=1	14-3-3 zeta-like type II [Penaeus monodon]
	c37291.graph_c0	2.70362	0	0	6.37011	[D]	Cell cycle control, cell division, chromosome partitioning	Biological Process: mitotic cell cycle (GO:0000278);; Biological Process: cell cycle process (GO:0022402);; Biological Process: regulation of cell cycle (GO:0051726);;	K06627|0.0|dre:192295|ccna2, CycA2, cb671, chunp6924, wu:fi36f03	[D]	Cell cycle control, cell division, chromosome partitioning	Cyclin, N-terminal domain;; Cyclin, C-terminal domain	G2/mitotic-specific cyclin-A OS=Patella vulgata (Common limpet) PE=2 SV=1	hypothetical protein BRAFLDRAFT_69715 [Branchiostoma floridae]
	c75877.graph_c0	2.84666	0	0	6.34489	--	--	Biological Process: cell cycle (GO:0007049);;	K04503|1e-148|dre:30222|ccnd1, cb161, cycd1, etID37810.7, fb52e01, fc83a12, id:ibd1198, wu:fb52e01, wu:fc83a12	[D]	Cell cycle control, cell division, chromosome partitioning	Cyclin, N-terminal domain;; Cyclin, C-terminal domain	G2/mitotic-specific cyclin-A (Fragment) OS=Hydra viridissima (Green hydra) PE=2 SV=1	hypothetical protein BRAFLDRAFT_271951 [Branchiostoma floridae]
	c20648.graph_c0	5.63199	0	0	7.20894	[D]	Cell cycle control, cell division, chromosome partitioning	Biological Process: cell cycle (GO:0007049);;	--	[D]	Cell cycle control, cell division, chromosome partitioning	Cyclin, N-terminal domain;; Cyclin, C-terminal domain	G2/mitotic-specific cyclin-B OS=Spisula solidissima (Atlantic surf-clam) PE=2 SV=1	cyclin B [Tachypleus tridentatus]
	c15985.graph_c0	3.20177	0	1.35339e-10	5.14597	[O]	Posttranslational modification, protein turnover, chaperones	Molecular Function: nucleotide binding (GO:0000166);; Biological Process: cell cycle (GO:0007049);; Molecular Function: acid-amino acid ligase activity (GO:0016881);;	K06688|1e-98|dre:566441|MGC123190	[O]	Posttranslational modification, protein turnover, chaperones	Ubiquitin-conjugating enzyme	Ubiquitin-conjugating enzyme E2 C GN=UBE2C OS=Spisula solidissima (Atlantic surf-clam) PE=1 SV=1	Ubiquitin-conjugating enzyme E2 C [Caligus rogercresseyi]
	c78037.graph_c0	1.33735	0	5.13436e-09	4.9255	[RTKL]	--	Biological Process: activation of MAPKK activity (GO:0000186);; Molecular Function: MAP kinase kinase kinase activity (GO:0004709);; Biological Process: female meiosis II (GO:0007147);; Biological Process: female gamete generation (GO:0007292);; Biological Process: negative regulation of mitotic cell cycle (GO:0045930);;	K04367|1e-130|dre:795517|mos, MGC173909, c-mos	[T]	Signal transduction mechanisms	Protein kinase domain;; Protein tyrosine kinase	Serine/threonine-protein kinase mos {ECO:0000250|UniProtKB:P10741} OS=Patiria pectinifera (Starfish) PE=1 SV=1	predicted protein [Nematostella vectensis]
	c76859.graph_c0	1.2385	0	2.5609e-08	4.81961	--	--	--	K04402|2e-57|dre:497646|gadd45bb, gadd45b1, gadd45bl, zgc:112453	--	--	Ribosomal protein L7Ae/L30e/S12e/Gadd45 family	--	Growth arrest and DNA-damage-inducible protein GADD45 gamma [Crassostrea gigas]
morphogenesis	c15430.graph_c0	3.70722	0.149476	1.86274e-10	3.91673	[J]	Translation, ribosomal structure and biogenesis	Biological Process: mitotic spindle elongation (GO:0000022);; Molecular Function: protein tyrosine kinase activity (GO:0004713);; Cellular Component: microtubule associated complex (GO:0005875);; Cellular Component: plasma membrane (GO:0005886);; Biological Process: cellular response to DNA damage stimulus (GO:0006974);; Biological Process: actin filament organization (GO:0007015);; Biological Pr…	K04381|2e-80|dre:550548|stmn1b, fj43c10, wu:fj38b07, wu:fj43c10, zgc:110159	--	--	Stathmin family	Glutamic acid-rich protein (Precursor) GN=GARP OS=Plasmodium falciparum (isolate FC27 / Papua New Guinea) PE=4 SV=1	hypothetical protein BRAFLDRAFT_231109 [Branchiostoma floridae]
	c51666.graph_c0	0.342072	2.81877	1.66578e-09	-3.02369	--	--	Biological Process: reproduction (GO:0000003);; Molecular Function: binding (GO:0005488);; Biological Process: anatomical structure morphogenesis (GO:0009653);; Biological Process: single-organism cellular process (GO:0044763);; Biological Process: single-organism developmental process (GO:0044767);; Biological Process: organ development (GO:0048513);;	--	[RP]	--	--	Muscle M-line assembly protein unc-89 GN=unc-89 OS=Caenorhabditis elegans PE=1 SV=3	axoneme-associated protein mst101 [Entamoeba dispar SAW760]
	c29064.graph_c0	9.52616	0.111803	0	5.45746	--	--	Biological Process: morphogenesis of an epithelium (GO:0002009);; Biological Process: nematode larval development (GO:0002119);; Molecular Function: motor activity (GO:0003774);; Molecular Function: protein binding (GO:0005515);; Cellular Component: cytoplasmic dynein complex (GO:0005868);; Biological Process: DNA replication (GO:0006260);; Biological Process: receptor-mediated endocytosis (GO:00…	--	[Z]	Cytoskeleton	Dynein light chain type 1	Dynein light chain 2, cytoplasmic GN=Cdlc2 OS=Drosophila melanogaster (Fruit fly) PE=3 SV=1	Chain A, Lc8 - Ana2 (159-168) Complex
	c57575.graph_c0	0.130198	0.881499	1.36201e-06	-2.72501	--	--	Molecular Function: nucleotide binding (GO:0000166);; Molecular Function: guanyl-nucleotide exchange factor activity (GO:0005085);; Biological Process: imaginal disc-derived leg morphogenesis (GO:0007480);; Biological Process: intracellular signal transduction (GO:0035556);; Molecular Function: anion binding (GO:0043168);;	--	[T]	Signal transduction mechanisms	RhoGEF domain	Muscle M-line assembly protein unc-89 GN=unc-89 OS=Caenorhabditis elegans PE=1 SV=3	PREDICTED: puratrophin-1-like [Strongylocentrotus purpuratus]
	c16255.graph_c0	1.37261	0	1.81298e-11	5.25831	--	--	Biological Process: negative regulation of transcription from RNA polymerase II promoter (GO:0000122);; Molecular Function: RNA polymerase II regulatory region sequence-specific DNA binding (GO:0000977);; Molecular Function: RNA polymerase II transcription corepressor activity (GO:0001106);; Biological Process: mesodermal cell fate commitment (GO:0001710);; Cellular Component: nucleus (GO:0005634…	--	--	--	Fascin domain;; FRG1-like family;; Fibroblast growth factor;; Protein of unknown function (DUF569)	Protein singed GN=sn OS=Drosophila melanogaster (Fruit fly) PE=3 SV=1	PREDICTED: fascin-like [Ciona intestinalis]
	c25551.graph_c0	1.13383	0.0449905	2.95648e-07	3.73307	--	--	Biological Process: embryonic development via the syncytial blastoderm (GO:0001700);; Biological Process: tissue homeostasis (GO:0001894);; Molecular Function: sodium:potassium-exchanging ATPase activity (GO:0005391);; Molecular Function: ATP binding (GO:0005524);; Cellular Component: nucleus (GO:0005634);; Cellular Component: sodium:potassium-exchanging ATPase complex (GO:0005890);; Cellular Com…	K01539|0.0|dre:64612|atp1a1, atp1a1a.1, atp1a1l1, atp[a]1B1, cb70, wu:fa03c03, wu:fb92h10	[P]	Inorganic ion transport and metabolism	haloacid dehalogenase-like hydrolase;; Putative hydrolase of sodium-potassium ATPase alpha subunit;; Cation transporting ATPase, C-terminus;; haloacid dehalogenase-like hydrolase;; haloacid dehalogenase-like hydrolase	Sodium/potassium-transporting ATPase subunit alpha GN=Atpalpha OS=Drosophila melanogaster (Fruit fly) PE=1 SV=3	PREDICTED: sodium/potassium-transporting ATPase subunit alpha-1 isoform X1 [Saccoglossus kowalevskii]
mitosis	c18495.graph_c0	1.39372	0	3.84426e-06	4.44544	[O]	Posttranslational modification, protein turnover, chaperones	Molecular Function: ATP binding (GO:0005524);; Cellular Component: lipid particle (GO:0005811);; Cellular Component: chaperonin-containing T-complex (GO:0005832);; Cellular Component: microtubule associated complex (GO:0005875);; Biological Process: protein folding (GO:0006457);; Biological Process: mitotic spindle organization (GO:0007052);; Biological Process: mitosis (GO:0007067);; Biological …	K09498|1e-115|ptr:463421|CCT6A	[O]	Posttranslational modification, protein turnover, chaperones	TCP-1/cpn60 chaperonin family	T-complex protein 1 subunit zeta GN=cct-6 OS=Caenorhabditis elegans PE=1 SV=1	PREDICTED: T-complex protein 1 subunit zeta-like [Strongylocentrotus purpuratus]
	c75825.graph_c0	2.9652	0	9.99201e-16	5.73681	[O]	Posttranslational modification, protein turnover, chaperones	Biological Process: nematode larval development (GO:0002119);; Molecular Function: ubiquitin-protein ligase activity (GO:0004842);; Cellular Component: microtubule associated complex (GO:0005875);; Biological Process: apoptotic process (GO:0006915);; Biological Process: mitosis (GO:0007067);; Biological Process: male meiosis (GO:0007140);; Biological Process: spermatid development (GO:0007286);; …	K06689|7e-98|bfo:BRAFLDRAFT_285353|hypothetical protein	[O]	Posttranslational modification, protein turnover, chaperones	Ubiquitin-conjugating enzyme	Ubiquitin-conjugating enzyme E2-17 kDa GN=eff OS=Drosophila melanogaster (Fruit fly) PE=2 SV=1	hypothetical protein BRAFLDRAFT_285353 [Branchiostoma floridae]
	c35899.graph_c0	2.02776	0	0	5.95255	[RTKL]	--	Cellular Component: chromosome, centromeric region (GO:0000775);; Molecular Function: protein serine/threonine kinase activity (GO:0004674);; Molecular Function: ATP binding (GO:0005524);; Cellular Component: nucleus (GO:0005634);; Cellular Component: cytoplasm (GO:0005737);; Cellular Component: microtubule organizing center (GO:0005815);; Cellular Component: spindle (GO:0005819);; Biological Pro…	K11481|0.0|dre:445246|aurka, zgc:100912	[D]	Cell cycle control, cell division, chromosome partitioning	Protein kinase domain;; Protein tyrosine kinase;; Kinase-like	Aurora kinase {ECO:0000312|EMBL:BAJ10384.1} OS=Patiria pectinifera (Starfish) PE=1 SV=1	PREDICTED: aurora kinase A isoform X1 [Saccoglossus kowalevskii]
	c57892.graph_c0	0.0592677	2.22241	8.7475e-08	-4.18067	--	--	Biological Process: nematode larval development (GO:0002119);; Molecular Function: ubiquitin-protein ligase activity (GO:0004842);; Cellular Component: microtubule associated complex (GO:0005875);; Biological Process: apoptotic process (GO:0006915);; Biological Process: mitosis (GO:0007067);; Biological Process: male meiosis (GO:0007140);; Biological Process: spermatid development (GO:0007286);; …	K06689|3e-88|dre:100001914|ube2d4, MGC162263, zgc:162263	[O]	Posttranslational modification, protein turnover, chaperones	Ubiquitin-conjugating enzyme;; RWD domain	Ubiquitin-conjugating enzyme E2-17 kDa GN=eff OS=Drosophila melanogaster (Fruit fly) PE=2 SV=1	ubiquitinconjugating enzyme E2, putative [Acanthamoeba castellanii str. Neff]
	c18023.graph_c0	1.87022	0	1.23016e-06	4.53737	[T]	Signal transduction mechanisms	Cellular Component: protein phosphatase type 2A complex (GO:0000159);; Molecular Function: protein serine/threonine phosphatase activity (GO:0004722);; Cellular Component: centriole (GO:0005814);; Biological Process: protein dephosphorylation (GO:0006470);; Biological Process: phagocytosis (GO:0006909);; Biological Process: actin filament organization (GO:0007015);; Biological Process: chromosome…	K04382|1e-144|dre:406582|ppp2cb, fb17h07, fc05c02, fk24a01, wu:fb17h07, wu:fc05c02, wu:fk24a01, zgc:55808, zgc:77172	[T]	Signal transduction mechanisms	Calcineurin-like phosphoesterase	Serine/threonine-protein phosphatase PP2A GN=mts OS=Drosophila melanogaster (Fruit fly) PE=2 SV=1	GH10208 [Drosophila grimshawi]
growth	c19239.graph_c0	1.45388	0.0403833	2.1098e-05	3.7526	[TZDR]	--	Cellular Component: spindle pole (GO:0000922);; Molecular Function: calmodulin-dependent protein kinase activity (GO:0004683);; Molecular Function: calcium ion binding (GO:0005509);; Biological Process: detection of calcium ion (GO:0005513);; Molecular Function: calmodulin binding (GO:0005516);; Molecular Function: ATP binding (GO:0005524);; Cellular Component: centriole (GO:0005814);; Cellular C…	K02183|1e-101|mdo:100018191|hypothetical protein LOC100018191	[T]	Signal transduction mechanisms	EF hand;; EF-hand domain pair;; EF-hand domain pair;; EF-hand domain;; EF hand;; EF-hand domain;; Cytoskeletal-regulatory complex EF hand;; Secreted protein acidic and rich in cysteine Ca binding region;; Ca2+ insensitive EF hand;; Uncharacterised protein family (UPF0154)	Calmodulin OS=Stichopus japonicus (Sea cucumber) PE=1 SV=2	Protein CMD-1 [Caenorhabditis elegans]
	c75825.graph_c0	2.9652	0	9.99201e-16	5.73681	[O]	Posttranslational modification, protein turnover, chaperones	Biological Process: nematode larval development (GO:0002119);; Molecular Function: ubiquitin-protein ligase activity (GO:0004842);; Cellular Component: microtubule associated complex (GO:0005875);; Biological Process: apoptotic process (GO:0006915);; Biological Process: mitosis (GO:0007067);; Biological Process: male meiosis (GO:0007140);; Biological Process: spermatid development (GO:0007286);; …	K06689|7e-98|bfo:BRAFLDRAFT_285353|hypothetical protein	[O]	Posttranslational modification, protein turnover, chaperones	Ubiquitin-conjugating enzyme	Ubiquitin-conjugating enzyme E2-17 kDa GN=eff OS=Drosophila melanogaster (Fruit fly) PE=2 SV=1	hypothetical protein BRAFLDRAFT_285353 [Branchiostoma floridae]
	c35104.graph_c0	5.00249	0.0204338	0	6.4624	[J]	Translation, ribosomal structure and biogenesis	Biological Process: nematode larval development (GO:0002119);; Molecular Function: translation elongation factor activity (GO:0003746);; Molecular Function: GTPase activity (GO:0003924);; Molecular Function: GTP binding (GO:0005525);; Cellular Component: cytoplasm (GO:0005737);; Biological Process: GTP catabolic process (GO:0006184);; Biological Process: translational elongation (GO:0006414);; Bi…	--	[J]	Translation, ribosomal structure and biogenesis	Elongation factor Tu GTP binding domain;; Elongation factor Tu C-terminal domain;; Elongation factor Tu domain 2;; Elongation factor Tu domain 4;; 50S ribosome-binding GTPase	Elongation factor 1-alpha GN=eft-4 OS=Caenorhabditis elegans PE=3 SV=1	eukaryotic translation elongation factor 1A [Trichuris trichiura]
	c29064.graph_c0	9.52616	0.111803	0	5.45746	--	--	Biological Process: morphogenesis of an epithelium (GO:0002009);; Biological Process: nematode larval development (GO:0002119);; Molecular Function: motor activity (GO:0003774);; Molecular Function: protein binding (GO:0005515);; Cellular Component: cytoplasmic dynein complex (GO:0005868);; Biological Process: DNA replication (GO:0006260);; Biological Process: receptor-mediated endocytosis (GO:00…	--	[Z]	Cytoskeleton	Dynein light chain type 1	Dynein light chain 2, cytoplasmic GN=Cdlc2 OS=Drosophila melanogaster (Fruit fly) PE=3 SV=1	Chain A, Lc8 - Ana2 (159-168) Complex
	c50617.graph_c0	0	1.41863	7.1433e-06	-4.44352	[G]	Carbohydrate transport and metabolism	Cellular Component: phosphopyruvate hydratase complex (GO:0000015);; Molecular Function: magnesium ion binding (GO:0000287);; Biological Process: nematode larval development (GO:0002119);; Molecular Function: phosphopyruvate hydratase activity (GO:0004634);; Biological Process: glycolysis (GO:0006096);; Biological Process: receptor-mediated endocytosis (GO:0006898);; Biological Process: determina…	K01689|1e-125|hmg:100215404|similar to enolase 3, (beta, muscle)	[G]	Carbohydrate transport and metabolism	Enolase, C-terminal TIM barrel domain;; Methylaspartate ammonia-lyase C-terminus	Enolase OS=Doryteuthis pealeii (Longfin inshore squid) PE=2 SV=1	PREDICTED: beta-enolase-like [Hydra vulgaris]
	c20429.graph_c0	3.87586	0.0461385	6.77236e-14	4.93789	[R]	General function prediction only	Biological Process: nematode larval development (GO:0002119);; Molecular Function: GTPase activity (GO:0003924);; Molecular Function: protein binding (GO:0005515);; Molecular Function: GTP binding (GO:0005525);; Biological Process: GTP catabolic process (GO:0006184);; Biological Process: intracellular protein transport (GO:0006886);; Biological Process: nucleocytoplasmic transport (GO:0006913);; …	K07936|1e-146|dre:30572|ran, fc16b04, wu:fc16b04	[U]	Intracellular trafficking, secretion, and vesicular transport	Ras family;; Miro-like protein;; ADP-ribosylation factor family;; RNA helicase;; Gtr1/RagA G protein conserved region	GTP-binding nuclear protein ran-1 GN=ran-1 OS=Caenorhabditis elegans PE=1 SV=1	PREDICTED: GTP-binding nuclear protein Ran-like [Amphimedon queenslandica]
	c22794.graph_c0	1.94698	0.0207999	2.10942e-15	5.09112	[MJ]	--	Cellular Component: cytoplasm (GO:0005737);; Biological Process: long-term memory (GO:0007616);; Biological Process: axon midline choice point recognition (GO:0016199);; Biological Process: negative regulation of translation (GO:0017148);; Cellular Component: filopodium (GO:0030175);; Molecular Function: translation initiation factor binding (GO:0031369);; Molecular Function: ribosome binding (GO…	--	[J]	Translation, ribosomal structure and biogenesis	eIF4-gamma/eIF5/eIF2-epsilon	Protein krasavietz GN=kra OS=Drosophila melanogaster (Fruit fly) PE=1 SV=1	hypothetical protein BRAFLDRAFT_120788 [Branchiostoma floridae]
	c57892.graph_c0	0.0592677	2.22241	8.7475e-08	-4.18067	--	--	Biological Process: nematode larval development (GO:0002119);; Molecular Function: ubiquitin-protein ligase activity (GO:0004842);; Cellular Component: microtubule associated complex (GO:0005875);; Biological Process: apoptotic process (GO:0006915);; Biological Process: mitosis (GO:0007067);; Biological Process: male meiosis (GO:0007140);; Biological Process: spermatid development (GO:0007286);; …	K06689|3e-88|dre:100001914|ube2d4, MGC162263, zgc:162263	[O]	Posttranslational modification, protein turnover, chaperones	Ubiquitin-conjugating enzyme;; RWD domain	Ubiquitin-conjugating enzyme E2-17 kDa GN=eff OS=Drosophila melanogaster (Fruit fly) PE=2 SV=1	ubiquitinconjugating enzyme E2, putative [Acanthamoeba castellanii str. Neff]
	c15593.graph_c0	4.4496	0.111512	0	4.71087	--	--	Biological Process: action potential (GO:0001508);; Molecular Function: ATP:ADP antiporter activity (GO:0005471);; Cellular Component: mitochondrial inner membrane (GO:0005743);; Cellular Component: lipid particle (GO:0005811);; Biological Process: mitochondrial transport (GO:0006839);; Biological Process: flight behavior (GO:0007629);; Biological Process: determination of adult lifespan (GO:0008…	K05863|0.0|dre:192321|slc25a5, CHUNP6931, SI:bZ46J2.1, SI:bZ46J2.3, SI:bZ46J2.5, SI:bZ46J2.6, SI:bZ46J2.7, SI:bZ46J2.9, si:bz46j2.2, sr:nyz040, wu:fe06b05	[C]	Energy production and conversion	Mitochondrial carrier protein	ADP,ATP carrier protein GN=sesB OS=Drosophila melanogaster (Fruit fly) PE=2 SV=4	ADP/ATP translocase [Latrodectus hesperus]
	c54933.graph_c0	0	1.31527	2.10343e-12	-5.43253	[J]	Translation, ribosomal structure and biogenesis	Biological Process: nematode larval development (GO:0002119);; Molecular Function: translation elongation factor activity (GO:0003746);; Molecular Function: GTPase activity (GO:0003924);; Molecular Function: GTP binding (GO:0005525);; Biological Process: GTP catabolic process (GO:0006184);; Biological Process: translational elongation (GO:0006414);; Biological Process: apoptotic process (GO:00069…	K03234|0.0|xla:100505433|hypothetical protein LOC100505433	[J]	Translation, ribosomal structure and biogenesis	Elongation factor G, domain IV;; Elongation factor G C-terminus;; Elongation factor Tu domain 2;; Elongation Factor G, domain II	Elongation factor 2 GN=eef-2 OS=Caenorhabditis elegans PE=1 SV=4	eukaryotic translation elongation factor 2, putative [Acanthamoeba castellanii str. Neff]
	c42633.graph_c0	6.1537	0	3.02513e-09	4.95913	[M]	Cell wall/membrane/envelope biogenesis	Biological Process: reproduction (GO:0000003);; Biological Process: nematode larval development (GO:0002119);; Biological Process: embryo development ending in birth or egg hatching (GO:0009792);; Molecular Function: transferase activity, transferring glycosyl groups (GO:0016757);; Biological Process: growth (GO:0040007);; Cellular Component: striated muscle dense body (GO:0055120);;	K00750|4e-52|dre:415152|gygl, zgc:86679	[G]	Carbohydrate transport and metabolism	Glycosyl transferase family 8	Glycogenin-1 {ECO:0000312|WormBase:F56B6.4a} OS=Caenorhabditis elegans PE=1 SV=1	PREDICTED: glycogenin-1 isoform X2 [Ciona intestinalis]
	c47995.graph_c0	12.0852	0.0844479	0	6.5426	[J]	Translation, ribosomal structure and biogenesis	Biological Process: nematode larval development (GO:0002119);; Molecular Function: translation elongation factor activity (GO:0003746);; Molecular Function: GTPase activity (GO:0003924);; Molecular Function: GTP binding (GO:0005525);; Biological Process: GTP catabolic process (GO:0006184);; Biological Process: translational elongation (GO:0006414);; Biological Process: apoptotic process (GO:00069…	K03234|0.0|oaa:100085359|similar to eukaryotic translation elongation factor 2	[J]	Translation, ribosomal structure and biogenesis	Elongation factor Tu GTP binding domain;; Elongation factor G, domain IV;; Elongation factor G C-terminus;; Elongation Factor G, domain II;; Elongation factor Tu domain 2;; 50S ribosome-binding GTPase	Elongation factor 2 GN=eef-2 OS=Caenorhabditis elegans PE=1 SV=4	PREDICTED: elongation factor 2-like [Saccoglossus kowalevskii]
	c25551.graph_c0	1.13383	0.0449905	2.95648e-07	3.73307	--	--	Biological Process: embryonic development via the syncytial blastoderm (GO:0001700);; Biological Process: tissue homeostasis (GO:0001894);; Molecular Function: sodium:potassium-exchanging ATPase activity (GO:0005391);; Molecular Function: ATP binding (GO:0005524);; Cellular Component: nucleus (GO:0005634);; Cellular Component: sodium:potassium-exchanging ATPase complex (GO:0005890);; Cellular Com…	K01539|0.0|dre:64612|atp1a1, atp1a1a.1, atp1a1l1, atp[a]1B1, cb70, wu:fa03c03, wu:fb92h10	[P]	Inorganic ion transport and metabolism	haloacid dehalogenase-like hydrolase;; Putative hydrolase of sodium-potassium ATPase alpha subunit;; Cation transporting ATPase, C-terminus;; haloacid dehalogenase-like hydrolase;; haloacid dehalogenase-like hydrolase	Sodium/potassium-transporting ATPase subunit alpha GN=Atpalpha OS=Drosophila melanogaster (Fruit fly) PE=1 SV=3	PREDICTED: sodium/potassium-transporting ATPase subunit alpha-1 isoform X1 [Saccoglossus kowalevskii]
	c15897.graph_c0	3.22049	0	0	6.2117	--	--	Cellular Component: extracellular region (GO:0005576);; Molecular Function: growth factor activity (GO:0008083);; Biological Process: growth (GO:0040007);;	K05495|1e-139|dre:30125|dvr1, DVR-1, VG1, cb556, zDVR-1, zDVR1, zgc:103542	[T]	Signal transduction mechanisms	Transforming growth factor beta like domain;; TGF-beta propeptide	Univin (Precursor) OS=Strongylocentrotus purpuratus (Purple sea urchin) PE=2 SV=2	hypothetical protein BRAFLDRAFT_278638 [Branchiostoma floridae]
	c76626.graph_c0	1.29236	0	3.99625e-07	4.6238	[P]	Inorganic ion transport and metabolism	Molecular Function: calcium-transporting ATPase activity (GO:0005388);; Molecular Function: ATP binding (GO:0005524);; Cellular Component: nuclear envelope (GO:0005635);; Biological Process: cellular calcium ion homeostasis (GO:0006874);; Biological Process: receptor-mediated endocytosis (GO:0006898);; Biological Process: apoptotic process (GO:0006915);; Biological Process: determination of adult…	K05853|0.0|dre:494489|atp2a1l, zgc:154094	[P]	Inorganic ion transport and metabolism	E1-E2 ATPase;; Putative hydrolase of sodium-potassium ATPase alpha subunit	Calcium-transporting ATPase sarcoplasmic/endoplasmic reticulum type OS=Anopheles gambiae (African malaria mosquito) PE=3 SV=5	PREDICTED: sarcoplasmic/endoplasmic reticulum calcium ATPase 1-like isoform X2 [Ciona intestinalis]
development	c19239.graph_c0	1.45388	0.0403833	2.1098e-05	3.7526	[TZDR]	--	Cellular Component: spindle pole (GO:0000922);; Molecular Function: calmodulin-dependent protein kinase activity (GO:0004683);; Molecular Function: calcium ion binding (GO:0005509);; Biological Process: detection of calcium ion (GO:0005513);; Molecular Function: calmodulin binding (GO:0005516);; Molecular Function: ATP binding (GO:0005524);; Cellular Component: centriole (GO:0005814);; Cellular C…	K02183|1e-101|mdo:100018191|hypothetical protein LOC100018191	[T]	Signal transduction mechanisms	EF hand;; EF-hand domain pair;; EF-hand domain pair;; EF-hand domain;; EF hand;; EF-hand domain;; Cytoskeletal-regulatory complex EF hand;; Secreted protein acidic and rich in cysteine Ca binding region;; Ca2+ insensitive EF hand;; Uncharacterised protein family (UPF0154)	Calmodulin OS=Stichopus japonicus (Sea cucumber) PE=1 SV=2	Protein CMD-1 [Caenorhabditis elegans]
	c15430.graph_c0	3.70722	0.149476	1.86274e-10	3.91673	[J]	Translation, ribosomal structure and biogenesis	Biological Process: mitotic spindle elongation (GO:0000022);; Molecular Function: protein tyrosine kinase activity (GO:0004713);; Cellular Component: microtubule associated complex (GO:0005875);; Cellular Component: plasma membrane (GO:0005886);; Biological Process: cellular response to DNA damage stimulus (GO:0006974);; Biological Process: actin filament organization (GO:0007015);; Biological Pr…	K04381|2e-80|dre:550548|stmn1b, fj43c10, wu:fj38b07, wu:fj43c10, zgc:110159	--	--	Stathmin family	Glutamic acid-rich protein (Precursor) GN=GARP OS=Plasmodium falciparum (isolate FC27 / Papua New Guinea) PE=4 SV=1	hypothetical protein BRAFLDRAFT_231109 [Branchiostoma floridae]
	c75825.graph_c0	2.9652	0	9.99201e-16	5.73681	[O]	Posttranslational modification, protein turnover, chaperones	Biological Process: nematode larval development (GO:0002119);; Molecular Function: ubiquitin-protein ligase activity (GO:0004842);; Cellular Component: microtubule associated complex (GO:0005875);; Biological Process: apoptotic process (GO:0006915);; Biological Process: mitosis (GO:0007067);; Biological Process: male meiosis (GO:0007140);; Biological Process: spermatid development (GO:0007286);; …	K06689|7e-98|bfo:BRAFLDRAFT_285353|hypothetical protein	[O]	Posttranslational modification, protein turnover, chaperones	Ubiquitin-conjugating enzyme	Ubiquitin-conjugating enzyme E2-17 kDa GN=eff OS=Drosophila melanogaster (Fruit fly) PE=2 SV=1	hypothetical protein BRAFLDRAFT_285353 [Branchiostoma floridae]
	c51666.graph_c0	0.342072	2.81877	1.66578e-09	-3.02369	--	--	Biological Process: reproduction (GO:0000003);; Molecular Function: binding (GO:0005488);; Biological Process: anatomical structure morphogenesis (GO:0009653);; Biological Process: single-organism cellular process (GO:0044763);; Biological Process: single-organism developmental process (GO:0044767);; Biological Process: organ development (GO:0048513);;	--	[RP]	--	--	Muscle M-line assembly protein unc-89 GN=unc-89 OS=Caenorhabditis elegans PE=1 SV=3	axoneme-associated protein mst101 [Entamoeba dispar SAW760]
	c16640.graph_c0	1.80274	0	2.18657e-05	4.29552	--	--	Cellular Component: pericentriolar material (GO:0000242);; Biological Process: cytokinesis (GO:0000910);; Cellular Component: cytoplasmic mRNA processing body (GO:0000932);; Cellular Component: endoplasmic reticulum (GO:0005783);; Biological Process: mitotic spindle organization (GO:0007052);; Biological Process: cell death (GO:0008219);; Biological Process: embryo development ending in birth or …	--	[U]	Intracellular trafficking, secretion, and vesicular transport	Scd6-like Sm domain	--	Protein LSM14-like protein, partial [Stegodyphus mimosarum]
	c35104.graph_c0	5.00249	0.0204338	0	6.4624	[J]	Translation, ribosomal structure and biogenesis	Biological Process: nematode larval development (GO:0002119);; Molecular Function: translation elongation factor activity (GO:0003746);; Molecular Function: GTPase activity (GO:0003924);; Molecular Function: GTP binding (GO:0005525);; Cellular Component: cytoplasm (GO:0005737);; Biological Process: GTP catabolic process (GO:0006184);; Biological Process: translational elongation (GO:0006414);; Bi…	--	[J]	Translation, ribosomal structure and biogenesis	Elongation factor Tu GTP binding domain;; Elongation factor Tu C-terminal domain;; Elongation factor Tu domain 2;; Elongation factor Tu domain 4;; 50S ribosome-binding GTPase	Elongation factor 1-alpha GN=eft-4 OS=Caenorhabditis elegans PE=3 SV=1	eukaryotic translation elongation factor 1A [Trichuris trichiura]
	c29064.graph_c0	9.52616	0.111803	0	5.45746	--	--	Biological Process: morphogenesis of an epithelium (GO:0002009);; Biological Process: nematode larval development (GO:0002119);; Molecular Function: motor activity (GO:0003774);; Molecular Function: protein binding (GO:0005515);; Cellular Component: cytoplasmic dynein complex (GO:0005868);; Biological Process: DNA replication (GO:0006260);; Biological Process: receptor-mediated endocytosis (GO:00…	--	[Z]	Cytoskeleton	Dynein light chain type 1	Dynein light chain 2, cytoplasmic GN=Cdlc2 OS=Drosophila melanogaster (Fruit fly) PE=3 SV=1	Chain A, Lc8 - Ana2 (159-168) Complex
	c46212.graph_c0	6.96251	0.0707531	0	5.66338	[G]	Carbohydrate transport and metabolism	Biological Process: achiasmate meiosis I (GO:0000705);; Cellular Component: condensed nuclear chromosome outer kinetochore (GO:0000942);; Biological Process: response to hypoxia (GO:0001666);; Molecular Function: fructose-bisphosphate aldolase activity (GO:0004332);; Molecular Function: protein kinase activity (GO:0004672);; Cellular Component: centrosome (GO:0005813);; Cellular Component: spindl…	K01623|0.0|dre:321664|aldob, fb25f09, wu:fb25f09	[G]	Carbohydrate transport and metabolism	Fructose-bisphosphate aldolase class-I	Fructose-bisphosphate aldolase GN=Ald OS=Drosophila melanogaster (Fruit fly) PE=1 SV=5	aldolase class-1 protein [Apostichopus japonicus]
	c35899.graph_c0	2.02776	0	0	5.95255	[RTKL]	--	Cellular Component: chromosome, centromeric region (GO:0000775);; Molecular Function: protein serine/threonine kinase activity (GO:0004674);; Molecular Function: ATP binding (GO:0005524);; Cellular Component: nucleus (GO:0005634);; Cellular Component: cytoplasm (GO:0005737);; Cellular Component: microtubule organizing center (GO:0005815);; Cellular Component: spindle (GO:0005819);; Biological Pro…	K11481|0.0|dre:445246|aurka, zgc:100912	[D]	Cell cycle control, cell division, chromosome partitioning	Protein kinase domain;; Protein tyrosine kinase;; Kinase-like	Aurora kinase {ECO:0000312|EMBL:BAJ10384.1} OS=Patiria pectinifera (Starfish) PE=1 SV=1	PREDICTED: aurora kinase A isoform X1 [Saccoglossus kowalevskii]
	c32187.graph_c0	1.35251	0.0512284	3.31023e-11	4.005	--	--	Biological Process: response to stress (GO:0006950);; Biological Process: signal transduction (GO:0007165);; Biological Process: neurogenesis (GO:0022008);; Cellular Component: intracellular part (GO:0044424);; Biological Process: single-organism developmental process (GO:0044767);;	--	[T]	Signal transduction mechanisms	Regulator of G protein signaling domain;; Raf-like Ras-binding domain;; GoLoco motif	Regulator of G-protein signaling loco GN=loco OS=Drosophila melanogaster (Fruit fly) PE=1 SV=2	hypothetical protein BRAFLDRAFT_84869 [Branchiostoma floridae]
	c50617.graph_c0	0	1.41863	7.1433e-06	-4.44352	[G]	Carbohydrate transport and metabolism	Cellular Component: phosphopyruvate hydratase complex (GO:0000015);; Molecular Function: magnesium ion binding (GO:0000287);; Biological Process: nematode larval development (GO:0002119);; Molecular Function: phosphopyruvate hydratase activity (GO:0004634);; Biological Process: glycolysis (GO:0006096);; Biological Process: receptor-mediated endocytosis (GO:0006898);; Biological Process: determina…	K01689|1e-125|hmg:100215404|similar to enolase 3, (beta, muscle)	[G]	Carbohydrate transport and metabolism	Enolase, C-terminal TIM barrel domain;; Methylaspartate ammonia-lyase C-terminus	Enolase OS=Doryteuthis pealeii (Longfin inshore squid) PE=2 SV=1	PREDICTED: beta-enolase-like [Hydra vulgaris]
	c20429.graph_c0	3.87586	0.0461385	6.77236e-14	4.93789	[R]	General function prediction only	Biological Process: nematode larval development (GO:0002119);; Molecular Function: GTPase activity (GO:0003924);; Molecular Function: protein binding (GO:0005515);; Molecular Function: GTP binding (GO:0005525);; Biological Process: GTP catabolic process (GO:0006184);; Biological Process: intracellular protein transport (GO:0006886);; Biological Process: nucleocytoplasmic transport (GO:0006913);; …	K07936|1e-146|dre:30572|ran, fc16b04, wu:fc16b04	[U]	Intracellular trafficking, secretion, and vesicular transport	Ras family;; Miro-like protein;; ADP-ribosylation factor family;; RNA helicase;; Gtr1/RagA G protein conserved region	GTP-binding nuclear protein ran-1 GN=ran-1 OS=Caenorhabditis elegans PE=1 SV=1	PREDICTED: GTP-binding nuclear protein Ran-like [Amphimedon queenslandica]
	c16255.graph_c0	1.37261	0	1.81298e-11	5.25831	--	--	Biological Process: negative regulation of transcription from RNA polymerase II promoter (GO:0000122);; Molecular Function: RNA polymerase II regulatory region sequence-specific DNA binding (GO:0000977);; Molecular Function: RNA polymerase II transcription corepressor activity (GO:0001106);; Biological Process: mesodermal cell fate commitment (GO:0001710);; Cellular Component: nucleus (GO:0005634…	--	--	--	Fascin domain;; FRG1-like family;; Fibroblast growth factor;; Protein of unknown function (DUF569)	Protein singed GN=sn OS=Drosophila melanogaster (Fruit fly) PE=3 SV=1	PREDICTED: fascin-like [Ciona intestinalis]
	c57892.graph_c0	0.0592677	2.22241	8.7475e-08	-4.18067	--	--	Biological Process: nematode larval development (GO:0002119);; Molecular Function: ubiquitin-protein ligase activity (GO:0004842);; Cellular Component: microtubule associated complex (GO:0005875);; Biological Process: apoptotic process (GO:0006915);; Biological Process: mitosis (GO:0007067);; Biological Process: male meiosis (GO:0007140);; Biological Process: spermatid development (GO:0007286);; …	K06689|3e-88|dre:100001914|ube2d4, MGC162263, zgc:162263	[O]	Posttranslational modification, protein turnover, chaperones	Ubiquitin-conjugating enzyme;; RWD domain	Ubiquitin-conjugating enzyme E2-17 kDa GN=eff OS=Drosophila melanogaster (Fruit fly) PE=2 SV=1	ubiquitinconjugating enzyme E2, putative [Acanthamoeba castellanii str. Neff]
	c36783.graph_c0	0.328712	3.92605	8.65628e-06	-3.24141	[R]	General function prediction only	Molecular Function: GTPase activity (GO:0003924);; Molecular Function: GTP binding (GO:0005525);; Cellular Component: Golgi stack (GO:0005795);; Biological Process: protein ADP-ribosylation (GO:0006471);; Biological Process: post-Golgi vesicle-mediated transport (GO:0006892);; Biological Process: cell adhesion (GO:0007155);; Biological Process: neurotransmitter secretion (GO:0007269);; Biological…	K07977|1e-113|nve:NEMVE_v1g242285|hypothetical protein	[U]	Intracellular trafficking, secretion, and vesicular transport	ADP-ribosylation factor family;; Signal recognition particle receptor beta subunit;; Ras family;; Gtr1/RagA G protein conserved region;; Miro-like protein;; 50S ribosome-binding GTPase	ADP-ribosylation factor 1 GN=ARF1 OS=Locusta migratoria (Migratory locust) PE=2 SV=2	hypothetical protein HELRODRAFT_186077 [Helobdella robusta]
	c77625.graph_c0	0	1.33301	1.19999e-05	-4.39842	[C]	Energy production and conversion	Biological Process: multicellular organismal development (GO:0007275);; Biological Process: ATP synthesis coupled proton transport (GO:0015986);; Biological Process: single-organism developmental process (GO:0044767);;	K02137|1e-15|nve:NEMVE_v1g94346|hypothetical protein	[C]	Energy production and conversion	ATP synthase delta (OSCP) subunit	ATP synthase subunit delta, organellar chromatophore {ECO:0000255|HAMAP-Rule:MF_01416} GN=PCC_0204 OS=Paulinella chromatophora PE=3 SV=1	ATP synthase delta subunit [Bigelowiella natans]
	c18978.graph_c0	13.9617	0.0782562	0	6.73584	[G]	Carbohydrate transport and metabolism	Molecular Function: glyceraldehyde-3-phosphate dehydrogenase (NAD+) (phosphorylating) activity (GO:0004365);; Cellular Component: cytoplasm (GO:0005737);; Biological Process: glycolysis (GO:0006096);; Biological Process: determination of adult lifespan (GO:0008340);; Biological Process: embryo development ending in birth or egg hatching (GO:0009792);; Cellular Component: microtubule cytoskeleton …	K00134|0.0|dre:317743|gapdh, cb609, gapd, mg:bb02e05, wu:fb33a10, wu:ft80f05	[G]	Carbohydrate transport and metabolism	Glyceraldehyde 3-phosphate dehydrogenase, C-terminal domain;; Glyceraldehyde 3-phosphate dehydrogenase, NAD binding domain	Glyceraldehyde-3-phosphate dehydrogenase 3.1 GN=gpd-3.1 OS=Caenorhabditis briggsae PE=3 SV=1	PREDICTED: glyceraldehyde-3-phosphate dehydrogenase-like [Ciona intestinalis]
	c54933.graph_c0	0	1.31527	2.10343e-12	-5.43253	[J]	Translation, ribosomal structure and biogenesis	Biological Process: nematode larval development (GO:0002119);; Molecular Function: translation elongation factor activity (GO:0003746);; Molecular Function: GTPase activity (GO:0003924);; Molecular Function: GTP binding (GO:0005525);; Biological Process: GTP catabolic process (GO:0006184);; Biological Process: translational elongation (GO:0006414);; Biological Process: apoptotic process (GO:00069…	K03234|0.0|xla:100505433|hypothetical protein LOC100505433	[J]	Translation, ribosomal structure and biogenesis	Elongation factor G, domain IV;; Elongation factor G C-terminus;; Elongation factor Tu domain 2;; Elongation Factor G, domain II	Elongation factor 2 GN=eef-2 OS=Caenorhabditis elegans PE=1 SV=4	eukaryotic translation elongation factor 2, putative [Acanthamoeba castellanii str. Neff]
	c32839.graph_c0	3.1108	0	3.02513e-09	4.95913	--	--	Molecular Function: binding (GO:0005488);; Biological Process: cellular process (GO:0009987);; Biological Process: developmental process (GO:0032502);; Biological Process: single-organism process (GO:0044699);;	--	[K]	Transcription	Helix-loop-helix DNA-binding domain	Twist-related protein GN=TWIST OS=Branchiostoma belcheri (Amphioxus) PE=2 SV=1	hypothetical protein BRAFLDRAFT_105675 [Branchiostoma floridae]
	c42633.graph_c0	6.1537	0	3.02513e-09	4.95913	[M]	Cell wall/membrane/envelope biogenesis	Biological Process: reproduction (GO:0000003);; Biological Process: nematode larval development (GO:0002119);; Biological Process: embryo development ending in birth or egg hatching (GO:0009792);; Molecular Function: transferase activity, transferring glycosyl groups (GO:0016757);; Biological Process: growth (GO:0040007);; Cellular Component: striated muscle dense body (GO:0055120);;	K00750|4e-52|dre:415152|gygl, zgc:86679	[G]	Carbohydrate transport and metabolism	Glycosyl transferase family 8	Glycogenin-1 {ECO:0000312|WormBase:F56B6.4a} OS=Caenorhabditis elegans PE=1 SV=1	PREDICTED: glycogenin-1 isoform X2 [Ciona intestinalis]
	c47995.graph_c0	12.0852	0.0844479	0	6.5426	[J]	Translation, ribosomal structure and biogenesis	Biological Process: nematode larval development (GO:0002119);; Molecular Function: translation elongation factor activity (GO:0003746);; Molecular Function: GTPase activity (GO:0003924);; Molecular Function: GTP binding (GO:0005525);; Biological Process: GTP catabolic process (GO:0006184);; Biological Process: translational elongation (GO:0006414);; Biological Process: apoptotic process (GO:00069…	K03234|0.0|oaa:100085359|similar to eukaryotic translation elongation factor 2	[J]	Translation, ribosomal structure and biogenesis	Elongation factor Tu GTP binding domain;; Elongation factor G, domain IV;; Elongation factor G C-terminus;; Elongation Factor G, domain II;; Elongation factor Tu domain 2;; 50S ribosome-binding GTPase	Elongation factor 2 GN=eef-2 OS=Caenorhabditis elegans PE=1 SV=4	PREDICTED: elongation factor 2-like [Saccoglossus kowalevskii]
	c25551.graph_c0	1.13383	0.0449905	2.95648e-07	3.73307	--	--	Biological Process: embryonic development via the syncytial blastoderm (GO:0001700);; Biological Process: tissue homeostasis (GO:0001894);; Molecular Function: sodium:potassium-exchanging ATPase activity (GO:0005391);; Molecular Function: ATP binding (GO:0005524);; Cellular Component: nucleus (GO:0005634);; Cellular Component: sodium:potassium-exchanging ATPase complex (GO:0005890);; Cellular Com…	K01539|0.0|dre:64612|atp1a1, atp1a1a.1, atp1a1l1, atp[a]1B1, cb70, wu:fa03c03, wu:fb92h10	[P]	Inorganic ion transport and metabolism	haloacid dehalogenase-like hydrolase;; Putative hydrolase of sodium-potassium ATPase alpha subunit;; Cation transporting ATPase, C-terminus;; haloacid dehalogenase-like hydrolase;; haloacid dehalogenase-like hydrolase	Sodium/potassium-transporting ATPase subunit alpha GN=Atpalpha OS=Drosophila melanogaster (Fruit fly) PE=1 SV=3	PREDICTED: sodium/potassium-transporting ATPase subunit alpha-1 isoform X1 [Saccoglossus kowalevskii]
	c76626.graph_c0	1.29236	0	3.99625e-07	4.6238	[P]	Inorganic ion transport and metabolism	Molecular Function: calcium-transporting ATPase activity (GO:0005388);; Molecular Function: ATP binding (GO:0005524);; Cellular Component: nuclear envelope (GO:0005635);; Biological Process: cellular calcium ion homeostasis (GO:0006874);; Biological Process: receptor-mediated endocytosis (GO:0006898);; Biological Process: apoptotic process (GO:0006915);; Biological Process: determination of adult…	K05853|0.0|dre:494489|atp2a1l, zgc:154094	[P]	Inorganic ion transport and metabolism	E1-E2 ATPase;; Putative hydrolase of sodium-potassium ATPase alpha subunit	Calcium-transporting ATPase sarcoplasmic/endoplasmic reticulum type OS=Anopheles gambiae (African malaria mosquito) PE=3 SV=5	PREDICTED: sarcoplasmic/endoplasmic reticulum calcium ATPase 1-like isoform X2 [Ciona intestinalis]
collagen	c54738.graph_c0	3.56963	0.506302	1.82808e-08	2.54533	--	--	--	--	--	--	--	--	alpha-2 collagen [Strongylocentrotus purpuratus]
	c38162.graph_c0	3.4657	0	6.66134e-16	5.75607	[J]	Translation, ribosomal structure and biogenesis	Molecular Function: exonuclease activity (GO:0004527);;	--	[R]	General function prediction only	--	Cuticle collagen 2 (Precursor) GN=col-2 OS=Caenorhabditis elegans PE=2 SV=1	hypothetical protein BRAFLDRAFT_156042 [Branchiostoma floridae]
