# Supplementary material for: Comparative transcriptome analysis of papilla and skin in the sea cucumber, Apostichopus japonicus
Source: PeerJ. 2016 Mar 7;4:e1779. doi: 10.7717/peerj.1779 (PMC4793329; doi:10.7717/peerj.1779)
Supplement: Supplemental Information 5 [file peerj-04-1779-s005.xlsx]

## Sheet: Table S5
Supplemental Table S5. The detailed information of KEGG enrichment pathways.
#Pathway	ko_ID	Unigene	gene	Unigene_all	gene_all
Phenylalanine metabolism	ko00360	2	26	296	6718	c14535.graph_c0;c30000.graph_c1	K14455+K11188
Phototransduction - fly	ko04745	2	11	296	6718	c62169.graph_c0;c65694.graph_c1	K02183+K05328
Ether lipid metabolism	ko00565	1	44	296	6718	c50745.graph_c0	K01047
Neurotrophin signaling pathway	ko04722	3	35	296	6718	c15646.graph_c0;c19239.graph_c0;c77885.graph_c0	K06630+K02183+K06630
Regulation of actin cytoskeleton	ko04810	9	90	296	6718	c15110.graph_c0;c33622.graph_c0;c34102.graph_c0;c37832.graph_c0;c64335.graph_c0;c75633.graph_c0;c77247.graph_c0;c78037.graph_c0;c8481.graph_c0	K05764+K10351+K04513+K05692+K05093+K05765+K05759+K04367+K05759
Pentose phosphate pathway	ko00030	6	71	296	6718	c15398.graph_c0;c19097.graph_c0;c20270.graph_c0;c46212.graph_c0;c75748.graph_c0;c76176.graph_c0	K00616+K03841+K01810+K01623+K00615+K01623
Gap junction	ko04540	2	48	296	6718	c14695.graph_c0;c15100.graph_c0	K02087+K07375
Porphyrin and chlorophyll metabolism	ko00860	2	41	296	6718	c27943.graph_c0;c75577.graph_c0	K00522+K00522
Proteasome	ko03050	2	110	296	6718	c18334.graph_c0;c75870.graph_c0	K02727+K02730
Cell cycle	ko04110	16	144	296	6718	c14695.graph_c0;c14826.graph_c0;c15646.graph_c0;c16273.graph_c0;c16284.graph_c0;c16840.graph_c0;c30900.graph_c0;c37291.graph_c0;c38053.graph_c0;c40000.graph_c0;c40875.graph_c0;c75877.graph_c0;c76474.graph_c0;c76859.graph_c0;c77885.graph_c0;c79574.graph_c0	K02087+K06630+K06630+K05868+K02210+K06635+K02537+K06627+K03363+K04802+K05868+K04503+K02212+K04402+K06630+K06631
Dorso-ventral axis formation	ko04320	1	38	296	6718	c78347.graph_c0	K02602
Leishmaniasis	ko05140	1	5	296	6718	c49333.graph_c0	K04011
Amyotrophic lateral sclerosis (ALS)	ko05014	1	9	296	6718	c58901.graph_c0	K04570
NOD-like receptor signaling pathway	ko04621	5	31	296	6718	c19969.graph_c0;c47889.graph_c0;c59278.graph_c0;c76440.graph_c0;c76706.graph_c0	K04079+K04079+K04725+K04734+K09487
Pancreatic cancer	ko05212	1	12	296	6718	c58901.graph_c0	K04570
Fatty acid elongation in mitochondria	ko00062	1	16	296	6718	c37901.graph_c0	K07515
Other glycan degradation	ko00511	1	43	296	6718	c32653.graph_c0	K01206
Prostate cancer	ko05215	1	19	296	6718	c47889.graph_c0	K04079
Nitrogen metabolism	ko00910	5	58	296	6718	c21296.graph_c0;c30364.graph_c0;c32864.graph_c0;c52613.graph_c0;c70814.graph_c0	K00261+K01915+K01915+K01915+K01672
Melanogenesis	ko04916	1	45	296	6718	c19239.graph_c0	K02183
Citrate cycle (TCA cycle)	ko00020	3	97	296	6718	c31397.graph_c0;c76243.graph_c0;c76385.graph_c0	K00026+K00031+K00025
RIG-I-like receptor signaling pathway	ko04622	1	25	296	6718	c76440.graph_c0	K04734
Olfactory transduction	ko04740	1	13	296	6718	c19239.graph_c0	K02183
p53 signaling pathway	ko04115	7	45	296	6718	c14695.graph_c0;c16273.graph_c0;c32726.graph_c0;c40875.graph_c0;c75877.graph_c0;c76406.graph_c0;c76859.graph_c0	K02087+K05868+K10808+K05868+K04503+K08738+K04402
Tyrosine metabolism	ko00350	2	39	296	6718	c14535.graph_c0;c53008.graph_c0	K14455+K00121
Oxidative phosphorylation	ko00190	8	273	296	6718	c16854.graph_c0;c40623.graph_c0;c75766.graph_c0;c75786.graph_c0;c76070.graph_c0;c76271.graph_c0;c76551.graph_c0;c77625.graph_c0	K02128+K02133+K02132+K02129+K02136+K00411+K02128+K02137
Phagosome	ko04145	5	161	296	6718	c15100.graph_c0;c23669.graph_c0;c37832.graph_c0;c43983.graph_c0;c69952.graph_c0	K07375+K08054+K05692+K13885+K05719
mRNA surveillance pathway	ko03015	9	169	296	6718	c14516.graph_c0;c18023.graph_c0;c23834.graph_c0;c29190.graph_c0;c30727.graph_c0;c44406.graph_c0;c66351.graph_c1;c76213.graph_c0;c77423.graph_c0	K13126+K04382+K13126+K12881+K13126+K13171+K13171+K14396+K13126
Glycerolipid metabolism	ko00561	2	70	296	6718	c16099.graph_c0;c47751.graph_c0	K00128+K01046
Purine metabolism	ko00230	7	298	296	6718	c18370.graph_c0;c18370.graph_c1;c32726.graph_c0;c33937.graph_c0;c38928.graph_c0;c75464.graph_c0;c76958.graph_c0	K00602+K00602+K10808+K01587+K00873+K00940+K00873
mTOR signaling pathway	ko04150	2	79	296	6718	c17968.graph_c0;c19325.graph_c0	K03259+K02991
One carbon pool by folate	ko00670	2	48	296	6718	c18370.graph_c0;c18370.graph_c1	K00602+K00602
Proximal tubule bicarbonate reclamation	ko04964	2	21	296	6718	c60365.graph_c0;c62701.graph_c0	K09864+K09864
Mismatch repair	ko03430	3	53	296	6718	c40000.graph_c0;c75712.graph_c0;c79452.graph_c0	K04802+K10755+K07466
Alanine, aspartate and glutamate metabolism	ko00250	5	112	296	6718	c14535.graph_c0;c21296.graph_c0;c30364.graph_c0;c32864.graph_c0;c52613.graph_c0	K14455+K00261+K01915+K01915+K01915
GnRH signaling pathway	ko04912	1	51	296	6718	c19239.graph_c0	K02183
Pyrimidine metabolism	ko00240	2	199	296	6718	c32726.graph_c0;c75464.graph_c0	K10808+K00940
Maturity onset diabetes of the young	ko04950	1	3	296	6718	c77318.graph_c0	K08024
Arginine and proline metabolism	ko00330	8	110	296	6718	c14535.graph_c0;c16099.graph_c0;c21296.graph_c0;c30364.graph_c0;c32864.graph_c0;c37143.graph_c0;c42922.graph_c0;c52613.graph_c0	K14455+K00128+K00261+K01915+K01915+K13253+K01611+K01915
Jak-STAT signaling pathway	ko04630	3	57	296	6718	c58901.graph_c0;c61674.graph_c0;c75877.graph_c0	K04570+K05064+K04503
Glycerophospholipid metabolism	ko00564	1	95	296	6718	c50745.graph_c0	K01047
Ribosome biogenesis in eukaryotes	ko03008	8	209	296	6718	c12901.graph_c0;c15745.graph_c0;c18794.graph_c0;c20429.graph_c0;c42249.graph_c0;c64808.graph_c0;c77037.graph_c0;c78253.graph_c0	K03115+K11129+K03264+K07936+K11131+K14563+K06943+K14570
Glycine, serine and threonine metabolism	ko00260	2	95	296	6718	c57772.graph_c0;c76797.graph_c0	K00544+K00281
Protein export	ko03060	4	59	296	6718	c15469.graph_c0;c37259.graph_c0;c76956.graph_c0;c77212.graph_c0	K12947+K09490+K09647+K09490
DNA replication	ko03030	6	97	296	6718	c16284.graph_c0;c40000.graph_c0;c75090.graph_c0;c75712.graph_c0;c76474.graph_c0;c79452.graph_c0	K02210+K04802+K02542+K10755+K02212+K07466
Starch and sucrose metabolism	ko00500	3	52	296	6718	c14968.graph_c0;c20270.graph_c0;c36751.graph_c0	K00688+K01810+K00688
Basal transcription factors	ko03022	1	72	296	6718	c79530.graph_c0	K03122
Endocytosis	ko04144	6	221	296	6718	c15014.graph_c0;c16531.graph_c0;c16800.graph_c0;c19848.graph_c0;c34102.graph_c0;c64335.graph_c0	K07941+K12490+K12194+K03283+K04513+K05093
Long-term potentiation	ko04720	1	21	296	6718	c19239.graph_c0	K02183
Steroid hormone biosynthesis	ko00140	1	12	296	6718	c28905.graph_c0	K00044
Pyruvate metabolism	ko00620	7	113	296	6718	c16099.graph_c0;c31397.graph_c0;c31903.graph_c0;c32090.graph_c0;c38928.graph_c0;c76385.graph_c0;c76958.graph_c0	K00128+K00026+K00016+K00029+K00873+K00025+K00873
Cytokine-cytokine receptor interaction	ko04060	1	32	296	6718	c61674.graph_c0	K05064
Glioma	ko05214	1	14	296	6718	c19239.graph_c0	K02183
Nucleotide excision repair	ko03420	3	81	296	6718	c40000.graph_c0;c75712.graph_c0;c79452.graph_c0	K04802+K10755+K07466
Cardiac muscle contraction	ko04260	3	51	296	6718	c25551.graph_c0;c28266.graph_c0;c33622.graph_c0	K01539+K09290+K10351
Protein processing in endoplasmic reticulum	ko04141	15	325	296	6718	c18562.graph_c0;c19848.graph_c0;c19969.graph_c0;c23669.graph_c0;c31912.graph_c0;c37259.graph_c0;c47889.graph_c0;c56335.graph_c0;c57892.graph_c0;c60249.graph_c0;c65233.graph_c0;c75825.graph_c0;c75846.graph_c0;c76706.graph_c0;c77212.graph_c0	K10575+K03283+K04079+K08054+K06689+K09490+K04079+K09542+K06689+K13249+K09562+K06689+K09502+K09487+K09490
Bile secretion	ko04976	2	27	296	6718	c60365.graph_c0;c62701.graph_c0	K09864+K09864
Hematopoietic cell lineage	ko04640	1	8	296	6718	c49333.graph_c0	K04011
Calcium signaling pathway	ko04020	4	64	296	6718	c15593.graph_c0;c19239.graph_c0;c76626.graph_c0;c78097.graph_c0	K05863+K02183+K05853+K05862
Complement and coagulation cascades	ko04610	1	7	296	6718	c49333.graph_c0	K04011
Glycolysis / Gluconeogenesis	ko00010	18	174	296	6718	c14614.graph_c0;c16099.graph_c0;c18978.graph_c0;c19097.graph_c0;c19541.graph_c0;c20270.graph_c0;c26393.graph_c0;c27310.graph_c0;c31903.graph_c0;c38928.graph_c0;c46212.graph_c0;c50617.graph_c0;c53008.graph_c0;c56843.graph_c0;c75876.graph_c0;c76176.graph_c0;c76494.graph_c0;c76958.graph_c0	K01689+K00128+K00134+K03841+K01689+K01810+K00927+K00134+K00016+K00873+K01623+K01689+K00121+K00134+K00134+K01623+K00134+K00873
Progesterone-mediated oocyte maturation	ko04914	10	117	296	6718	c14695.graph_c0;c16273.graph_c0;c19969.graph_c0;c30900.graph_c0;c37291.graph_c0;c40875.graph_c0;c47889.graph_c0;c78037.graph_c0;c78347.graph_c0;c79574.graph_c0	K02087+K05868+K04079+K02537+K06627+K05868+K04079+K04367+K02602+K06631
Lysosome	ko04142	7	247	296	6718	c14879.graph_c0;c22655.graph_c0;c22725.graph_c0;c31307.graph_c0;c54164.graph_c0;c73968.graph_c0;c77105.graph_c0	K01136+K12382+K12382+K13443+K01373+K13443+K01363
Biosynthesis of unsaturated fatty acids	ko01040	2	37	296	6718	c37901.graph_c0;c77856.graph_c0	K07515+K10256
Toll-like receptor signaling pathway	ko04620	1	45	296	6718	c76440.graph_c0	K04734
Pathways in cancer	ko05200	2	56	296	6718	c47889.graph_c0;c58901.graph_c0	K04079+K04570
Cytosolic DNA-sensing pathway	ko04623	1	31	296	6718	c76440.graph_c0	K04734
Hypertrophic cardiomyopathy (HCM)	ko05410	1	14	296	6718	c74814.graph_c0	K12567
Histidine metabolism	ko00340	1	41	296	6718	c16099.graph_c0	K00128
Linoleic acid metabolism	ko00591	1	17	296	6718	c50745.graph_c0	K01047
Ubiquitin mediated proteolysis	ko04120	8	268	296	6718	c15985.graph_c0;c18562.graph_c0;c31912.graph_c0;c38053.graph_c0;c57892.graph_c0;c59278.graph_c0;c75794.graph_c0;c75825.graph_c0	K06688+K10575+K06689+K03363+K06689+K04725+K10573+K06689
PPAR signaling pathway	ko03320	4	32	296	6718	c18818.graph_c0;c30533.graph_c0;c51202.graph_c0;c75458.graph_c0	K08762+K08764+K01897+K08752
Base excision repair	ko03410	4	61	296	6718	c15532.graph_c0;c26595.graph_c0;c40000.graph_c0;c42297.graph_c0	K10802+K10802+K04802+K10771
Fatty acid metabolism	ko00071	5	106	296	6718	c16099.graph_c0;c37901.graph_c0;c51202.graph_c0;c53008.graph_c0;c64888.graph_c0	K00128+K07515+K01897+K00121+K13239
Glycosaminoglycan biosynthesis - chondroitin sulfate	ko00532	1	42	296	6718	c73153.graph_c0	K03193
Spliceosome	ko03040	6	285	296	6718	c14530.graph_c0;c19848.graph_c0;c28269.graph_c0;c29190.graph_c0;c65390.graph_c0;c75659.graph_c0	K12832+K03283+K11086+K12881+K12893+K11087
Glutathione metabolism	ko00480	6	99	296	6718	c32726.graph_c0;c54286.graph_c0;c62465.graph_c0;c70389.graph_c0;c75780.graph_c0;c76243.graph_c0	K10808+K00799+K00799+K00432+K00799+K00031
Alzheimer's disease	ko05010	1	41	296	6718	c19239.graph_c0	K02183
Rheumatoid arthritis	ko05323	1	12	296	6718	c68152.graph_c0	K01394
MAPK signaling pathway	ko04010	5	113	296	6718	c15430.graph_c0;c19848.graph_c0;c64335.graph_c0;c76859.graph_c0;c78037.graph_c0	K04381+K03283+K05093+K04402+K04367
Small cell lung cancer	ko05222	1	19	296	6718	c58901.graph_c0	K04570
Apoptosis	ko04210	4	42	296	6718	c58901.graph_c0;c59278.graph_c0;c76406.graph_c0;c76440.graph_c0	K04570+K04725+K08738+K04734
Salivary secretion	ko04970	1	24	296	6718	c19239.graph_c0	K02183
Neuroactive ligand-receptor interaction	ko04080	1	101	296	6718	c71252.graph_c0	K04151
Butanoate metabolism	ko00650	1	64	296	6718	c37901.graph_c0	K07515
Pentose and glucuronate interconversions	ko00040	1	61	296	6718	c16099.graph_c0	K00128
ECM-receptor interaction	ko04512	2	73	296	6718	c58770.graph_c0;c69952.graph_c0	K06584+K05719
Drug metabolism - cytochrome P450	ko00982	4	59	296	6718	c53008.graph_c0;c54286.graph_c0;c62465.graph_c0;c75780.graph_c0	K00121+K00799+K00799+K00799
TGF-beta signaling pathway	ko04350	3	81	296	6718	c18023.graph_c0;c34102.graph_c0;c60333.graph_c0	K04382+K04513+K04661
Tryptophan metabolism	ko00380	6	82	296	6718	c14580.graph_c0;c16099.graph_c0;c19762.graph_c0;c37901.graph_c0;c57223.graph_c0;c73141.graph_c0	K03781+K00128+K03781+K07515+K01867+K01556
Cell adhesion molecules (CAMs)	ko04514	4	40	296	6718	c16773.graph_c0;c19039.graph_c0;c39464.graph_c0;c74345.graph_c0	K05689+K06087+K06087+K06780
Oocyte meiosis	ko04114	17	103	296	6718	c14695.graph_c0;c14826.graph_c0;c15646.graph_c0;c16273.graph_c0;c16840.graph_c0;c18023.graph_c0;c18975.graph_c0;c19239.graph_c0;c19661.graph_c0;c30900.graph_c0;c35899.graph_c0;c38053.graph_c0;c40875.graph_c0;c77885.graph_c0;c78037.graph_c0;c78347.graph_c0;c79574.graph_c0	K02087+K06630+K06630+K05868+K06635+K04382+K10318+K02183+K13056+K02537+K11481+K03363+K05868+K06630+K04367+K02602+K06631
RNA degradation	ko03018	9	161	296	6718	c14516.graph_c0;c14614.graph_c0;c19541.graph_c0;c23834.graph_c0;c28781.graph_c0;c28990.graph_c0;c30727.graph_c0;c50617.graph_c0;c77423.graph_c0	K13126+K01689+K01689+K13126+K14443+K04077+K13126+K01689+K13126
Aminoacyl-tRNA biosynthesis	ko00970	3	93	296	6718	c33372.graph_c0;c33372.graph_c1;c57223.graph_c0	K01893+K01893+K01867
Metabolism of xenobiotics by cytochrome P450	ko00980	4	55	296	6718	c53008.graph_c0;c54286.graph_c0;c62465.graph_c0;c75780.graph_c0	K00121+K00799+K00799+K00799
Retinol metabolism	ko00830	4	43	296	6718	c40353.graph_c0;c41501.graph_c0;c43012.graph_c0;c53008.graph_c0	K11147+K09516+K07437+K00121
Primary bile acid biosynthesis	ko00120	1	9	296	6718	c30533.graph_c0	K08764
Toxoplasmosis	ko05145	1	19	296	6718	c58901.graph_c0	K04570
Adherens junction	ko04520	4	58	296	6718	c12901.graph_c0;c16773.graph_c0;c34102.graph_c0;c37832.graph_c0	K03115+K05689+K04513+K05692
Steroid biosynthesis	ko00100	1	32	296	6718	c50537.graph_c0	K00559
Lysine degradation	ko00310	3	97	296	6718	c16099.graph_c0;c37901.graph_c0;c60068.graph_c0	K00128+K07515+K00471
Adipocytokine signaling pathway	ko04920	2	28	296	6718	c51202.graph_c0;c76440.graph_c0	K01897+K04734
Cysteine and methionine metabolism	ko00270	6	99	296	6718	c14535.graph_c0;c31903.graph_c0;c41160.graph_c0;c42922.graph_c0;c54209.graph_c0;c57772.graph_c0	K14455+K00016+K01251+K01611+K00789+K00544
Glycosaminoglycan degradation	ko00531	1	35	296	6718	c14879.graph_c0	K01136
Homologous recombination	ko03440	1	52	296	6718	c79452.graph_c0	K07466
Ribosome	ko03010	61	534	296	6718	c14806.graph_c0;c14872.graph_c0;c15370.graph_c0;c15431.graph_c0;c15490.graph_c0;c15571.graph_c0;c15599.graph_c0;c15768.graph_c0;c15868.graph_c0;c15894.graph_c0;c15896.graph_c0;c15943.graph_c0;c15969.graph_c0;c15970.graph_c0;c16040.graph_c0;c18142.graph_c0;c18142.graph_c1;c19325.graph_c0;c19530.graph_c0;c19560.graph_c0;c19577.graph_c0;c20356.graph_c0;c20439.graph_c0;c20539.graph_c0;c20617.graph_c0…	K02901+K02955+K02993+K02921+K02974+K02989+K02894+K02984+K02865+K02997+K02893+K02985+K02889+K02930+K02934+K02937+K02937+K02991+K02917+K02995+K02880+K02966+K02947+K02969+K02953+K02936+K02987+K02894+K02929+K02932+K02918+K02925+K02877+K02873+K02962+K02941+K02977+K02998+K02981+K02870+K02951+K02900+K02938+K02971+K02872+K02958+K02942+K02889+K02949+K02910+K02951+K02896+K02915+K02983+K02973+K02866+K02882+…
Propanoate metabolism	ko00640	4	75	296	6718	c16099.graph_c0;c31903.graph_c0;c37901.graph_c0;c47213.graph_c0	K00128+K00016+K07515+K01965
Malaria	ko05144	1	5	296	6718	c49333.graph_c0	K04011
Valine, leucine and isoleucine degradation	ko00280	3	102	296	6718	c16099.graph_c0;c37901.graph_c0;c47213.graph_c0	K00128+K07515+K01965
Wnt signaling pathway	ko04310	6	202	296	6718	c12901.graph_c0;c18023.graph_c0;c34102.graph_c0;c70952.graph_c0;c75169.graph_c0;c75877.graph_c0	K03115+K04382+K04513+K03068+K03068+K04503
Vascular smooth muscle contraction	ko04270	2	49	296	6718	c19239.graph_c0;c34102.graph_c0	K02183+K04513
D-Glutamine and D-glutamate metabolism	ko00471	1	5	296	6718	c21296.graph_c0	K00261
Glycosphingolipid biosynthesis - lacto and neolacto series	ko00601	1	20	296	6718	c68940.graph_c0	K07819
Phenylalanine, tyrosine and tryptophan biosynthesis	ko00400	1	11	296	6718	c14535.graph_c0	K14455
alpha-Linolenic acid metabolism	ko00592	1	23	296	6718	c50745.graph_c0	K01047
Sphingolipid metabolism	ko00600	1	71	296	6718	c67725.graph_c0	K04628
Peroxisome	ko04146	13	213	296	6718	c14580.graph_c0;c19762.graph_c0;c30533.graph_c0;c39023.graph_c0;c40353.graph_c0;c46125.graph_c0;c51202.graph_c0;c52078.graph_c0;c64888.graph_c0;c73649.graph_c0;c75615.graph_c0;c75735.graph_c0;c76243.graph_c0	K03781+K03781+K08764+K04564+K11147+K04565+K01897+K13356+K13239+K06664+K11517+K11187+K00031
Focal adhesion	ko04510	5	98	296	6718	c33622.graph_c0;c34102.graph_c0;c37832.graph_c0;c59278.graph_c0;c75877.graph_c0	K10351+K04513+K05692+K04725+K04503
Phosphatidylinositol signaling system	ko04070	2	109	296	6718	c19239.graph_c0;c62169.graph_c0	K02183+K02183
Glyoxylate and dicarboxylate metabolism	ko00630	4	64	296	6718	c31397.graph_c0;c47213.graph_c0;c75615.graph_c0;c76385.graph_c0	K00026+K01965+K11517+K00025
Dilated cardiomyopathy	ko05414	1	17	296	6718	c74814.graph_c0	K12567
Phototransduction	ko04744	1	7	296	6718	c19239.graph_c0	K02183
Arachidonic acid metabolism	ko00590	2	46	296	6718	c50745.graph_c0;c70389.graph_c0	K01047+K00432
beta-Alanine metabolism	ko00410	2	53	296	6718	c16099.graph_c0;c37901.graph_c0	K00128+K07515
Ascorbate and aldarate metabolism	ko00053	1	33	296	6718	c16099.graph_c0	K00128
Fructose and mannose metabolism	ko00051	3	87	296	6718	c19097.graph_c0;c46212.graph_c0;c76176.graph_c0	K03841+K01623+K01623
Amino sugar and nucleotide sugar metabolism	ko00520	3	79	296	6718	c15583.graph_c0;c20270.graph_c0;c28529.graph_c0	K01183+K01810+K00326
RNA transport	ko03013	26	401	296	6718	c14516.graph_c0;c14627.graph_c0;c15129.graph_c0;c15791.graph_c0;c16065.graph_c0;c16494.graph_c0;c17968.graph_c0;c18115.graph_c0;c20429.graph_c0;c23834.graph_c0;c29190.graph_c0;c30727.graph_c0;c44406.graph_c0;c66351.graph_c1;c69662.graph_c0;c75430.graph_c0;c75476.graph_c0;c75594.graph_c0;c76009.graph_c0;c76376.graph_c0;c76572.graph_c0;c76718.graph_c0;c76755.graph_c0;c77327.graph_c0;c77423.graph_c0…	K13126+K03262+K14303+K03257+K03257+K14295+K03259+K14293+K07936+K13126+K12881+K13126+K13171+K13171+K14305+K03231+K03231+K03113+K12160+K03245+K14293+K05019+K14303+K03242+K13126+K03257
Antigen processing and presentation	ko04612	2	11	296	6718	c47889.graph_c0;c77105.graph_c0	K04079+K01363
Gastric acid secretion	ko04971	1	17	296	6718	c19239.graph_c0	K02183
Tight junction	ko04530	10	87	296	6718	c12901.graph_c0;c14611.graph_c0;c18023.graph_c0;c19039.graph_c0;c33622.graph_c0;c34102.graph_c0;c37832.graph_c0;c39464.graph_c0;c77596.graph_c0;c77661.graph_c0	K03115+K06112+K04382+K06087+K10351+K04513+K05692+K06087+K10352+K10352
Chronic myeloid leukemia	ko05220	1	11	296	6718	c58901.graph_c0	K04570
Insulin signaling pathway	ko04910	5	75	296	6718	c14968.graph_c0;c17968.graph_c0;c19239.graph_c0;c19325.graph_c0;c36751.graph_c0	K00688+K03259+K02183+K02991+K00688
